# Supplementary material for: A Hybrid Computational Framework for Intelligent Inter- continent SARS-CoV-2 Sub-strains Characterization and Prediction
Source: Research Square preprint supplement (doi:10.21203/rs.3.rs-88429/v3), 2021-04-12
Supplement: Supplementary file 3 [file 8625af01c164ef369c1d178f.xlsx]

## Sheet: Male
Selected Unique Records
Continent	Country/Isolate	Dinucleotide transitions																Mutations												Cluster	Classification Targets
		AA	CC	GG	TT	AC	AG	AT	CG	CT	GT	TG	TC	TA	GC	GA	CA	AC	AG	AT	CG	CT	GT	TG	TC	TA	GC	GA	CA		C1	C2	C3	C4	C5	C6	C7
Africa	CMR_1	2436	757	948	2784	1748	1493	1970	390	1817	1727	2248	1216	2048	1015	1387	1771	1464	1532	2488	971	1496	1724	1605	1585	2530	870	1495	1424	7	0	0	0	0	0	0	1
Africa	DZA_1	2844	883	1092	3212	2018	1737	2306	438	2075	1990	2589	1410	2372	1167	1606	2082	1614	1785	2789	1085	1777	1704	1662	1793	2809	1053	1772	1604	6	0	0	0	0	0	1	0
Africa	EGY_1	2836	878	1092	3211	2015	1738	2301	438	2073	1990	2587	1407	2370	1166	1606	2078	1602	1722	2878	1030	1877	1857	2057	1704	2841	1163	1781	1575	3	0	0	1	0	0	0	0
Africa	EGY_10	2845	884	1091	3214	2019	1735	2306	438	2076	1988	2589	1408	2372	1168	1605	2082	1647	1694	2875	1073	1914	1832	2055	1723	2837	1148	1841	1535	7	0	0	0	0	0	0	1
Africa	EGY_11	2845	884	1092	3207	2023	1735	2302	436	2082	1985	2586	1413	2369	1166	1606	2084	1648	1692	2875	1073	1914	1832	2053	1726	2839	1150	1840	1535	7	0	0	0	0	0	0	1
Africa	EGY_13	2848	883	1083	3211	2019	1733	2306	439	2077	1987	2587	1408	2375	1166	1606	2077	1623	1783	2844	1072	1721	1651	1640	1709	2854	1107	1748	1652	3	0	0	1	0	0	0	0
Africa	EGY_16	2845	885	1091	3215	2021	1736	2304	438	2075	1989	2590	1407	2372	1167	1608	2082	1653	1728	2863	1223	1647	2062	1827	1827	2913	1044	1671	1658	3	0	0	1	0	0	0	0
Africa	EGY_17	2837	877	1082	3156	2005	1725	2284	433	2048	1958	2556	1391	2344	1152	1603	2068	1620	1771	2812	1068	1697	1632	1621	1685	2823	1094	1738	1643	7	0	0	0	0	0	0	1
Africa	EGY_19	2833	880	1083	3190	2006	1723	2296	433	2058	1977	2573	1404	2355	1151	1601	2068	1637	1685	2864	1066	1905	1821	2039	1710	2824	1139	1830	1526	3	0	0	1	0	0	0	0
Africa	EGY_2	2846	883	1091	3217	2020	1737	2303	433	2074	1987	2587	1404	2373	1164	1606	2081	1644	1694	2874	1072	1914	1834	2052	1720	2840	1147	1841	1533	7	0	0	0	0	0	0	1
Africa	EGY_20	2846	884	1090	3211	2022	1737	2306	437	2081	1987	2588	1414	2371	1166	1609	2084	1647	1693	2877	1073	1915	1832	2054	1727	2840	1150	1842	1535	7	0	0	0	0	0	0	1
Africa	EGY_21	2829	881	1082	3198	2010	1731	2295	435	2061	1979	2576	1398	2360	1163	1602	2074	1650	1784	2826	1141	1628	2095	1845	1812	2894	977	1692	1676	3	0	0	1	0	0	0	0
Africa	EGY_3	2840	876	1084	3179	2003	1727	2292	434	2058	1971	2567	1399	2355	1159	1598	2069	1622	1732	2829	1021	1784	1703	1859	1670	2810	1134	1769	1629	3	0	0	1	0	0	0	0
Africa	EGY_4	2845	883	1091	3212	2020	1736	2304	439	2078	1989	2588	1409	2374	1167	1606	2080	1625	1787	2842	1071	1722	1650	1646	1709	2853	1107	1746	1652	7	0	0	0	0	0	0	1
Africa	EGY_6	2838	878	1082	3167	2009	1726	2293	436	2059	1965	2567	1399	2351	1159	1603	2073	1638	1686	2856	1067	1900	1815	2035	1708	2822	1143	1835	1526	7	0	0	0	0	0	0	1
Africa	EGY_8	2846	882	1091	3216	2019	1735	2307	438	2075	1991	2589	1411	2373	1164	1606	2082	1645	1695	2878	1073	1915	1834	2055	1723	2838	1148	1843	1535	7	0	0	0	0	0	0	1
Africa	GHA_1	2094	645	801	2375	1496	1268	1731	328	1540	1472	1926	1029	1788	875	1173	1531	1157	1284	2150	774	1300	1291	1330	1292	2156	822	1258	1286	7	0	0	0	0	0	0	1
Africa	GHA_10	2464	768	951	2814	1759	1502	2032	401	1809	1755	2266	1228	2102	1029	1383	1805	1464	1475	2474	906	1649	1655	1807	1476	2472	994	1533	1406	7	0	0	0	0	0	0	1
Africa	GHA_11	1622	468	572	1834	1108	958	1333	235	1168	1086	1462	769	1357	671	896	1145	927	918	1652	579	1002	1094	1173	942	1626	617	994	917	7	0	0	0	0	0	0	1
Africa	GHA_12	2620	796	998	2921	1861	1569	2107	406	1880	1799	2367	1266	2153	1069	1472	1910	1488	1600	2479	999	1540	1524	1460	1530	2544	1002	1538	1511	2	0	1	0	0	0	0	0
Africa	GHA_13	2024	605	732	2181	1334	1149	1634	295	1385	1304	1768	958	1596	801	1105	1411	1141	1116	1965	723	1210	1307	1409	1122	1983	771	1197	1143	7	0	0	0	0	0	0	1
Africa	GHA_2	2787	865	1071	3156	1982	1701	2261	431	2031	1950	2539	1373	2328	1151	1571	2044	1586	1727	2683	1074	1654	1640	1574	1653	2725	1079	1655	1611	2	0	1	0	0	0	0	0
Africa	GHA_3	2776	861	1060	3123	1968	1685	2237	430	2009	1925	2512	1366	2295	1140	1561	2033	1577	1711	2656	1063	1640	1621	1562	1638	2701	1073	1640	1601	3	0	0	1	0	0	0	0
Africa	GHA_4	2409	736	896	2710	1674	1431	1977	341	1722	1645	2175	1163	2010	964	1335	1735	1401	1402	2429	866	1480	1608	1720	1376	2399	949	1466	1398	2	0	1	0	0	0	0	0
Africa	GHA_5	2680	823	1021	2963	1870	1620	2167	404	1914	1845	2412	1306	2209	1086	1506	1943	1512	1640	2712	1000	1583	1642	1622	1594	2708	1008	1614	1587	3	0	0	1	0	0	0	0
Africa	GHA_6	1616	493	568	1752	1121	950	1305	242	1168	1051	1440	788	1305	674	900	1172	931	917	1589	588	973	1061	1136	940	1619	653	973	925	7	0	0	0	0	0	0	1
Africa	GHA_7	1461	457	511	1634	996	837	1187	229	1047	967	1309	702	1190	597	810	1019	842	832	1456	542	911	985	1019	850	1451	575	868	826	7	0	0	0	0	0	0	1
Africa	GHA_8	2472	771	958	2803	1784	1497	2007	380	1813	1724	2271	1204	2068	1025	1399	1819	1422	1535	2372	946	1483	1454	1409	1472	2425	963	1471	1450	2	0	1	0	0	0	0	0
Africa	GHA_9	1940	576	706	2136	1288	1115	1571	287	1336	1268	1711	914	1551	790	1054	1366	1108	1104	1904	695	1168	1272	1353	1097	1914	726	1158	1086	7	0	0	0	0	0	0	1
Africa	GMB_2	2820	872	1072	3175	1999	1725	2268	432	2058	1973	2559	1389	2349	1156	1589	2052	1594	1740	2705	1073	1663	1656	1603	1670	2748	1082	1674	1622	3	0	0	1	0	0	0	0
Africa	GMB_6	2842	874	1085	3202	2009	1734	2300	437	2070	1984	2583	1404	2367	1166	1604	2071	1607	1756	2728	1081	1678	1671	1618	1682	2768	1093	1690	1637	3	0	0	1	0	0	0	0
Africa	GMB_7	2841	879	1090	3206	2015	1737	2302	438	2075	1986	2584	1409	2370	1166	1607	2076	1612	1761	2731	1084	1679	1672	1621	1685	2771	1099	1691	1642	3	0	0	1	0	0	0	0
Africa	MAR_1	2845	885	1092	3218	2020	1737	2306	437	2079	1989	2590	1409	2374	1168	1607	2082	1624	1835	2774	1184	1722	2047	1787	1862	2884	1035	1724	1621	7	0	0	0	0	0	0	1
Africa	MAR_2	2866	883	1090	3222	2019	1738	2307	437	2078	1987	2589	1410	2374	1168	1609	2082	1627	1786	2846	1071	1725	1652	1647	1708	2866	1106	1751	1656	7	0	0	0	0	0	0	1
Africa	MOZ_1	2652	826	1001	2988	1887	1603	2151	420	1926	1867	2425	1306	2209	1083	1497	1931	1559	1641	2631	1054	1622	1903	1755	1704	2680	947	1613	1539	3	0	0	1	0	0	0	0
Africa	MOZ_2	2842	881	1086	3218	2021	1736	2303	438	2079	1989	2590	1409	2372	1167	1608	2079	1682	1750	2839	1145	1738	2043	1887	1836	2882	1013	1729	1654	7	0	0	0	0	0	0	1
Africa	MOZ_3	2605	811	982	2971	1865	1585	2143	409	1899	1852	2404	1288	2204	1065	1480	1908	1537	1613	2616	1029	1606	1889	1740	1702	2658	931	1574	1528	3	0	0	1	0	0	0	0
Africa	MOZ_4	2840	882	1091	3215	2017	1737	2306	436	2079	1987	2589	1409	2374	1168	1607	2078	1681	1752	2836	1145	1739	2045	1888	1837	2881	1011	1729	1653	7	0	0	0	0	0	0	1
Africa	NGA_1	2780	865	1067	3101	1998	1701	2228	433	2034	1947	2535	1374	2300	1147	1578	2046	1586	1688	2767	1078	1638	1744	1681	1771	2704	995	1706	1637	3	0	0	1	0	0	0	0
Africa	NGA_11	2786	871	1078	3147	2001	1716	2263	435	2055	1968	2568	1387	2330	1157	1591	2056	1576	1694	2860	1034	1833	1808	2022	1665	2821	1172	1753	1548	3	0	0	1	0	0	0	0
Africa	NGA_12	2554	813	981	2858	1848	1588	2069	400	1895	1805	2324	1285	2153	1060	1442	1897	1457	1567	2605	954	1683	1653	1825	1553	2595	1087	1603	1434	3	0	0	1	0	0	0	0
Africa	NGA_13	2144	689	849	2448	1616	1374	1771	372	1654	1557	2017	1136	1833	935	1266	1657	1296	1367	2165	870	1363	1297	1313	1368	2166	857	1359	1263	7	0	0	0	0	0	0	1
Africa	NGA_2	2846	886	1092	3215	2022	1738	2306	437	2079	1989	2589	1414	2372	1166	1608	2086	1599	1751	2975	1075	1834	1866	2015	1765	2891	1156	1821	1612	2	0	1	0	0	0	0	0
Africa	NGA_3	2839	882	1090	3213	2013	1739	2304	438	2077	1988	2587	1409	2373	1168	1607	2076	1598	1713	2908	1042	1858	1835	2044	1678	2865	1185	1777	1568	2	0	1	0	0	0	0	0
Africa	NGA_4	2752	850	1060	3095	1979	1686	2241	427	2023	1940	2529	1367	2309	1140	1565	2029	1561	1672	2819	1017	1811	1785	1983	1638	2781	1156	1728	1538	3	0	0	1	0	0	0	0
Africa	NGA_6	2705	845	1054	3049	1952	1656	2208	422	1997	1917	2510	1364	2247	1127	1540	2019	1629	1686	2705	1121	1673	1975	1810	1770	2770	981	1651	1585	3	0	0	1	0	0	0	0
Africa	NGA_7	2586	783	980	2819	1853	1581	2048	402	1872	1815	2330	1256	2145	1070	1439	1888	1488	1511	2583	966	1550	1553	1572	1575	2575	957	1517	1499	3	0	0	1	0	0	0	0
Africa	NGA_8	2812	866	1086	3180	1992	1720	2286	434	2055	1973	2573	1389	2349	1162	1594	2056	1576	1694	2881	1037	1843	1815	2036	1664	2835	1169	1761	1552	3	0	0	1	0	0	0	0
Africa	NGA_9	2832	879	1086	3206	2010	1730	2301	434	2069	1980	2583	1399	2367	1160	1606	2067	1592	1769	2859	1062	1708	1634	1697	1670	2833	1107	1780	1611	3	0	0	1	0	0	0	0
Africa	RWA_1	2563	794	985	2867	1825	1572	2072	403	1856	1794	2314	1260	2147	1038	1456	1864	1462	1599	2454	972	1530	1493	1445	1512	2516	986	1535	1471	7	0	0	0	0	0	0	1
Africa	RWA_10	2579	795	980	2873	1832	1565	2059	394	1876	1804	2351	1260	2126	1047	1458	1869	1465	1575	2461	984	1515	1498	1463	1523	2503	991	1539	1487	7	0	0	0	0	0	0	1
Africa	RWA_11	2553	776	963	2846	1813	1548	2039	385	1852	1794	2331	1237	2115	1037	1432	1850	1447	1555	2436	975	1490	1499	1450	1509	2464	976	1520	1472	7	0	0	0	0	0	0	1
Africa	RWA_12	2245	685	826	2556	1577	1337	1818	331	1604	1568	2028	1082	1883	876	1250	1601	1271	1366	2158	825	1337	1304	1275	1321	2185	836	1332	1282	7	0	0	0	0	0	0	1
Africa	RWA_15	2028	641	799	2308	1460	1244	1671	322	1493	1439	1864	1010	1725	836	1154	1492	1185	1262	1962	778	1251	1197	1190	1210	2019	785	1231	1174	7	0	0	0	0	0	0	1
Africa	RWA_16	2047	636	787	2320	1475	1240	1673	320	1491	1450	1874	993	1746	827	1156	1488	1156	1285	1985	783	1231	1227	1148	1255	2032	760	1236	1172	7	0	0	0	0	0	0	1
Africa	RWA_18	1698	558	677	1917	1278	1059	1397	291	1284	1203	1571	859	1454	727	990	1293	1041	1077	1659	700	1057	1004	996	1022	1673	688	1077	1034	7	0	0	0	0	0	0	1
Africa	RWA_2	2732	849	1045	3035	1935	1668	2181	422	1979	1903	2466	1332	2261	1107	1546	1972	1549	1684	2603	1040	1601	1584	1540	1610	2650	1047	1629	1571	7	0	0	0	0	0	0	1
Africa	RWA_20	2566	801	974	2857	1816	1572	2058	399	1867	1784	2318	1272	2117	1049	1454	1870	1472	1575	2441	978	1527	1496	1459	1514	2496	994	1526	1485	7	0	0	0	0	0	0	1
Africa	RWA_21	2164	676	851	2373	1542	1309	1762	346	1551	1501	1973	1050	1792	900	1225	1596	1257	1329	2138	853	1279	1298	1276	1302	2122	812	1349	1259	7	0	0	0	0	0	0	1
Africa	RWA_22	1506	480	587	1786	1126	938	1265	241	1144	1075	1409	751	1324	630	881	1124	927	941	1499	593	956	927	898	913	1530	580	931	899	7	0	0	0	0	0	0	1
Africa	RWA_24	2511	788	963	2820	1793	1540	2041	395	1826	1775	2291	1240	2111	1030	1419	1842	1444	1553	2411	964	1513	1473	1437	1491	2468	978	1503	1457	7	0	0	0	0	0	0	1
Africa	RWA_25	1604	517	618	1851	1192	978	1342	260	1189	1141	1481	793	1403	656	920	1193	965	1004	1640	629	997	980	961	996	1629	604	1022	959	7	0	0	0	0	0	0	1
Africa	RWA_3	1808	567	703	2093	1329	1087	1498	292	1340	1292	1683	882	1564	742	1027	1326	1062	1131	1775	698	1130	1072	1058	1099	1773	706	1111	1066	7	0	0	0	0	0	0	1
Africa	RWA_5	2732	850	1045	3035	1936	1668	2181	423	1978	1903	2465	1332	2261	1107	1546	1973	1550	1684	2603	1040	1601	1583	1539	1610	2650	1048	1629	1571	7	0	0	0	0	0	0	1
Africa	RWA_7	1620	513	623	1878	1210	995	1357	272	1217	1167	1499	814	1434	664	934	1199	968	1014	1601	636	1018	969	953	989	1614	635	997	971	7	0	0	0	0	0	0	1
Africa	RWA_9	1554	501	613	1744	1131	954	1270	256	1160	1080	1421	767	1327	660	889	1142	938	962	1500	623	950	919	901	912	1520	609	968	914	7	0	0	0	0	0	0	1
Africa	SEN_12	2845	882	1089	3208	2018	1740	2308	438	2079	1991	2590	1412	2374	1167	1609	2083	1625	1786	2844	1074	1722	1652	1648	1711	2857	1107	1749	1652	2	0	1	0	0	0	0	0
Africa	SEN_13	2817	877	1088	3191	2002	1721	2277	437	2059	1971	2567	1394	2346	1157	1596	2057	1674	1731	2811	1139	1722	2028	1881	1816	2850	1001	1715	1637	7	0	0	0	0	0	0	1
Africa	SEN_16	2845	888	1089	3210	2024	1738	2305	439	2079	1989	2588	1412	2372	1165	1611	2083	1621	1743	2860	1063	1840	1903	2098	1712	2792	1180	1823	1610	3	0	0	1	0	0	0	0
Africa	SEN_17	2753	859	1065	3130	1965	1689	2240	423	2019	1940	2521	1372	2306	1127	1567	2019	1574	1655	2800	1075	1668	1939	1871	1805	2735	981	1651	1637	3	0	0	1	0	0	0	0
Africa	SEN_18	2517	797	980	2864	1790	1538	2038	384	1871	1771	2314	1247	2121	1040	1423	1822	1500	1548	2533	1026	1540	1831	1708	1647	2579	903	1526	1470	3	0	0	1	0	0	0	0
Africa	SEN_2	2252	726	888	2557	1633	1388	1837	370	1684	1610	2099	1131	1903	965	1286	1669	1347	1415	2289	867	1416	1390	1363	1451	2293	815	1429	1323	7	0	0	0	0	0	0	1
Africa	SEN_21	2783	859	1073	3155	1982	1690	2268	424	2035	1958	2543	1378	2337	1133	1565	2035	1641	1710	2789	1121	1694	2009	1859	1797	2835	992	1694	1616	7	0	0	0	0	0	0	1
Africa	SEN_22	2125	681	819	2443	1532	1292	1729	348	1627	1531	1989	1085	1804	910	1194	1551	1224	1336	2187	815	1411	1360	1471	1320	2159	897	1368	1229	7	0	0	0	0	0	0	1
Africa	SEN_25	2639	816	1003	2962	1874	1602	2128	393	1930	1862	2401	1298	2217	1060	1478	1912	1519	1609	2640	961	1689	1758	1905	1528	2687	1104	1646	1479	3	0	0	1	0	0	0	0
Africa	SEN_26	2839	882	1092	3215	2016	1736	2304	438	2075	1988	2587	1408	2371	1166	1607	2076	1622	1788	2859	1011	1804	1900	2024	1640	2885	1179	1742	1637	7	0	0	0	0	0	0	1
Africa	SEN_27	2366	765	923	2652	1694	1443	1902	357	1738	1682	2198	1161	1968	973	1343	1734	1373	1420	2356	916	1473	1690	1721	1523	2351	878	1472	1376	3	0	0	1	0	0	0	0
Africa	SEN_28	2841	883	1090	3213	2017	1736	2307	438	2077	1989	2590	1409	2374	1167	1607	2079	1639	1764	2786	1148	1708	2097	1899	1828	2852	1002	1711	1620	7	0	0	0	0	0	0	1
Africa	SEN_30	2807	868	1073	3195	1994	1704	2282	428	2059	1974	2571	1399	2345	1148	1580	2055	1668	1619	2858	1072	1659	1661	1734	1619	2803	1039	1734	1602	3	0	0	1	0	0	0	0
Africa	SEN_32	2846	882	1088	3215	2018	1735	2304	439	2075	1989	2587	1409	2371	1165	1607	2078	1609	1733	2886	1040	1846	1842	2024	1681	2857	1154	1805	1567	3	0	0	1	0	0	0	0
Africa	SEN_34	2840	883	1090	3214	2018	1735	2306	437	2077	1990	2591	1407	2374	1166	1607	2077	1682	1751	2835	1146	1738	2045	1888	1834	2881	1011	1729	1653	7	0	0	0	0	0	0	1
Africa	SEN_35	2722	847	1051	3097	1933	1659	2212	424	2005	1915	2487	1351	2289	1121	1536	1977	1628	1676	2726	1108	1679	1972	1827	1762	2765	980	1659	1591	3	0	0	1	0	0	0	0
Africa	SEN_36	2792	865	1080	3173	1985	1698	2274	426	2038	1961	2555	1382	2336	1147	1573	2048	1598	1692	2843	1053	1654	1675	1675	1723	2785	1023	1717	1638	3	0	0	1	0	0	0	0
Africa	SEN_37	2840	881	1091	3212	2017	1736	2303	438	2075	1989	2587	1409	2371	1166	1606	2079	1650	1732	2824	1036	1734	1733	1758	1736	2786	1052	1740	1676	7	0	0	0	0	0	0	1
Africa	SEN_38	2833	875	1087	3205	2016	1730	2296	439	2073	1983	2579	1411	2362	1161	1603	2075	1674	1743	2834	1140	1733	2029	1885	1833	2877	1009	1722	1647	7	0	0	0	0	0	0	1
Africa	SEN_39	2504	779	978	2861	1803	1541	2041	392	1888	1788	2325	1257	2124	1055	1420	1840	1507	1552	2543	1035	1552	1823	1708	1653	2574	908	1549	1466	3	0	0	1	0	0	0	0
Africa	SEN_4	2840	881	1091	3218	2015	1736	2307	439	2072	1990	2588	1408	2372	1166	1607	2079	1650	1733	2825	1036	1736	1734	1759	1734	2786	1052	1741	1677	7	0	0	0	0	0	0	1
Africa	SEN_40	2632	824	1019	2925	1866	1629	2116	415	1917	1855	2407	1287	2192	1098	1498	1918	1491	1596	2687	973	1710	1688	1908	1550	2644	1109	1655	1474	3	0	0	1	0	0	0	0
Africa	SEN_42	2838	881	1090	3207	2020	1735	2298	437	2078	1985	2586	1409	2366	1166	1606	2079	1668	1736	2846	1060	1732	1714	1678	1762	2851	1006	1750	1645	6	0	0	0	0	0	1	0
Africa	SEN_44	2736	853	1063	3089	1949	1682	2208	423	1994	1927	2501	1344	2285	1124	1554	1996	1547	1670	2794	1015	1780	1774	1969	1616	2769	1143	1711	1511	3	0	0	1	0	0	0	0
Africa	SEN_45	2817	877	1087	3184	2000	1722	2278	436	2059	1967	2563	1395	2345	1157	1596	2057	1672	1730	2808	1139	1722	2024	1879	1816	2850	1001	1716	1637	7	0	0	0	0	0	0	1
Africa	SEN_47	2828	882	1092	3205	2012	1732	2300	437	2070	1983	2585	1401	2367	1165	1605	2072	1601	1773	2855	1064	1714	1637	1699	1670	2822	1109	1787	1610	3	0	0	1	0	0	0	0
Africa	SEN_48	2837	882	1091	3207	2016	1735	2304	438	2076	1986	2584	1413	2368	1164	1607	2079	1681	1748	2834	1145	1737	2040	1887	1836	2879	1012	1729	1650	7	0	0	0	0	0	0	1
Africa	SEN_50	2846	885	1087	3213	2022	1737	2305	436	2077	1991	2590	1409	2374	1165	1607	2083	1610	1808	2912	1158	1617	2061	1824	1789	2969	1027	1707	1654	3	0	0	1	0	0	0	0
Africa	SEN_52	2720	840	1053	3102	1929	1656	2220	414	1986	1925	2510	1336	2284	1112	1543	1978	1539	1668	2752	968	1774	1775	1951	1657	2684	1118	1691	1583	3	0	0	1	0	0	0	0
Africa	SEN_54	2835	879	1091	3208	2017	1734	2300	438	2074	1985	2585	1408	2366	1165	1606	2078	1680	1748	2831	1144	1735	2038	1887	1834	2878	1008	1725	1651	7	0	0	0	0	0	0	1
Africa	SEN_57	2841	882	1090	3209	2019	1736	2305	437	2079	1987	2588	1412	2370	1165	1609	2081	1650	1733	2825	1034	1733	1733	1759	1738	2786	1052	1743	1678	7	0	0	0	0	0	0	1
Africa	SEN_58	2811	869	1081	3185	1996	1710	2283	433	2059	1969	2560	1394	2359	1152	1582	2050	1583	1748	2837	1057	1698	1621	1688	1653	2813	1102	1764	1590	3	0	0	1	0	0	0	0
Africa	SEN_59	2784	861	1075	3162	1977	1697	2262	426	2039	1964	2551	1383	2332	1138	1572	2031	1572	1648	2860	1007	1765	1856	2056	1671	2746	1138	1711	1613	7	0	0	0	0	0	0	1
Africa	SEN_61	2526	807	990	2882	1807	1555	2055	394	1885	1828	2352	1275	2134	1050	1427	1854	1462	1587	2551	967	1570	1771	1763	1558	2574	994	1549	1472	3	0	0	1	0	0	0	0
Africa	SEN_62	2754	857	1060	3128	1957	1684	2223	424	2023	1931	2518	1366	2293	1136	1561	2010	1634	1693	2747	1111	1691	1980	1848	1784	2793	983	1677	1605	3	0	0	1	0	0	0	0
Africa	SEN_63	2780	869	1085	3160	1976	1718	2258	430	2045	1960	2552	1386	2327	1151	1586	2037	1626	1722	2752	1185	1677	2010	1833	1764	2834	1019	1692	1555	3	0	0	1	0	0	0	0
Africa	SEN_65	2822	874	1087	3183	2003	1727	2286	434	2061	1980	2574	1393	2358	1161	1595	2063	1585	1703	2885	1038	1844	1825	2038	1669	2856	1176	1767	1557	3	0	0	1	0	0	0	0
Africa	SEN_66	2839	882	1091	3213	2018	1738	2304	437	2077	1989	2589	1409	2371	1167	1608	2080	1682	1751	2835	1146	1738	2043	1889	1835	2881	1012	1729	1653	7	0	0	0	0	0	0	1
Africa	SEN_69	2743	853	1067	3107	1963	1675	2215	426	2010	1939	2508	1354	2303	1122	1547	2000	1633	1685	2749	1113	1671	1984	1851	1769	2787	982	1673	1596	7	0	0	0	0	0	0	1
Africa	SEN_7	2674	836	1029	3031	1918	1642	2155	412	1983	1884	2449	1329	2246	1105	1516	1953	1605	1645	2685	1093	1639	1932	1801	1738	2722	965	1636	1568	3	0	0	1	0	0	0	0
Africa	SEN_71	2810	867	1080	3169	1995	1709	2280	429	2053	1967	2561	1388	2347	1148	1584	2050	1660	1727	2806	1130	1710	2018	1868	1813	2854	996	1708	1632	3	0	0	1	0	0	0	0
Africa	SEN_72	2845	883	1091	3213	2019	1737	2306	438	2078	1989	2589	1409	2374	1167	1608	2079	1651	1729	2864	1223	1647	2063	1826	1827	2913	1044	1670	1658	7	0	0	0	0	0	0	1
Africa	SEN_73	2768	862	1069	3142	1970	1699	2234	426	2031	1937	2528	1365	2308	1140	1575	2019	1646	1706	2764	1119	1688	1990	1861	1784	2799	992	1685	1621	7	0	0	0	0	0	0	1
Africa	SEN_76	2842	884	1090	3213	2021	1737	2303	438	2077	1991	2589	1409	2373	1167	1607	2082	1653	1729	2862	1223	1647	2064	1826	1828	2913	1044	1669	1658	7	0	0	0	0	0	0	1
Africa	SEN_77	2846	884	1089	3211	2022	1736	2300	439	2077	1988	2586	1408	2371	1167	1606	2081	1590	1793	2828	1076	1737	1684	1644	1785	2816	1094	1738	1658	6	0	0	0	0	0	1	0
Africa	SEN_79	2841	882	1088	3216	2017	1733	2306	440	2076	1988	2588	1408	2373	1168	1605	2077	1668	1730	2795	1189	1715	2039	1850	1780	2903	1030	1702	1583	7	0	0	0	0	0	0	1
Africa	SEN_81	2831	880	1089	3197	2013	1731	2293	437	2069	1985	2580	1403	2364	1162	1602	2071	1678	1747	2824	1142	1737	2031	1884	1829	2866	1008	1729	1650	7	0	0	0	0	0	0	1
Africa	SEN_82	2819	880	1090	3199	2011	1728	2290	438	2070	1977	2576	1400	2359	1163	1603	2065	1679	1742	2820	1143	1729	2036	1884	1823	2863	1010	1722	1646	7	0	0	0	0	0	0	1
Africa	SEN_9	2841	881	1090	3218	2019	1738	2304	437	2081	1987	2585	1410	2376	1167	1606	2079	1654	1731	2827	1035	1735	1735	1758	1736	2788	1051	1741	1677	7	0	0	0	0	0	0	1
Africa	TUN_11	2880	889	1090	3223	2022	1735	2312	435	2080	1989	2590	1407	2383	1167	1605	2080	1599	1733	2907	1177	1681	2009	1885	1853	2848	1022	1775	1623	4	0	0	0	1	0	0	0
Africa	TUN_12	2878	887	1093	3227	2023	1737	2314	436	2079	1985	2587	1410	2381	1165	1611	2083	1622	1729	2857	1092	1678	1786	1717	1802	2791	1014	1747	1675	4	0	0	0	1	0	0	0
Africa	TUN_13	2879	886	1094	3229	2021	1740	2310	438	2076	1989	2587	1406	2382	1167	1609	2080	2	9	13	4	18	10	11	13	7	6	12	11	1	1	0	0	0	0	0	0
Africa	TUN_2	2877	882	1087	3218	2018	1738	2308	439	2078	1988	2589	1408	2375	1167	1611	2079	1606	1718	2900	1111	1703	1705	1763	1747	2796	1056	1840	1609	7	0	0	0	0	0	0	1
Africa	TUN_3	2883	888	1091	3224	2020	1740	2306	438	2080	1989	2587	1411	2377	1168	1609	2081	1663	1761	2872	1201	1667	2103	1837	1814	2986	1030	1672	1644	4	0	0	0	1	0	0	0
Africa	TUN_4	2878	884	1094	3229	2021	1737	2312	437	2079	1988	2590	1411	2378	1165	1612	2081	1682	1768	2856	1195	1661	2128	1851	1784	2996	1041	1649	1662	4	0	0	0	1	0	0	0
Africa	TUN_5	2880	886	1094	3219	2022	1741	2308	438	2080	1991	2590	1412	2378	1168	1610	2084	2022	1741	2310	439	2082	1990	2589	1411	2377	1168	1611	2084	1	1	0	0	0	0	0	0
Africa	TUN_8	2878	882	1093	3222	2022	1740	2306	438	2078	1990	2590	1406	2378	1168	1610	2080	1618	1785	2789	1085	1780	1708	1665	1790	2820	1051	1778	1608	7	0	0	0	0	0	0	1
Africa	TUN_9	2878	886	1095	3219	2020	1739	2309	438	2079	1993	2590	1413	2378	1167	1608	2083	1624	1731	2856	1097	1676	1785	1717	1803	2791	1013	1747	1673	4	0	0	0	1	0	0	0
Africa	ZAF_1	2843	883	1088	3210	2021	1736	2303	439	2077	1989	2589	1410	2369	1167	1608	2082	1604	1719	2899	1110	1698	1703	1761	1749	2783	1056	1832	1604	7	0	0	0	0	0	0	1
Africa	ZAF_10	2869	882	1086	3217	2016	1736	2303	436	2077	1985	2580	1411	2374	1164	1602	2078	1606	1803	2909	1157	1618	2059	1818	1787	2966	1027	1708	1654	2	0	1	0	0	0	0	0
Africa	ZAF_100	2851	885	1089	3222	2021	1738	2309	437	2078	1991	2591	1411	2377	1167	1607	2084	1628	1795	2717	1082	1739	2116	1909	1880	2775	1018	1656	1712	7	0	0	0	0	0	0	1
Africa	ZAF_102	2843	882	1085	3221	2019	1737	2308	438	2077	1989	2588	1411	2375	1165	1609	2079	1605	1716	2902	1110	1703	1706	1761	1749	2785	1055	1832	1603	7	0	0	0	0	0	0	1
Africa	ZAF_106	2848	886	1086	3217	2020	1739	2308	439	2079	1991	2589	1413	2376	1168	1607	2083	1603	1735	2901	1176	1681	2007	1886	1850	2846	1023	1772	1621	6	0	0	0	0	0	1	0
Africa	ZAF_108	2880	885	1089	3221	2022	1738	2306	436	2081	1992	2592	1412	2375	1167	1607	2084	1657	1801	2852	986	1874	1979	2051	1701	2945	1115	1749	1618	7	0	0	0	0	0	0	1
Africa	ZAF_111	2843	882	1087	3217	2020	1738	2304	439	2079	1989	2589	1410	2373	1168	1608	2080	1621	1728	2879	983	1882	1832	2068	1669	2846	1186	1762	1615	2	0	1	0	0	0	0	0
Africa	ZAF_112	2840	878	1085	3217	2015	1738	2305	438	2079	1989	2585	1411	2377	1166	1606	2075	1622	1787	2861	1010	1806	1901	2025	1640	2887	1179	1742	1638	3	0	0	1	0	0	0	0
Africa	ZAF_114	2647	841	1033	3030	1913	1628	2159	423	1955	1884	2444	1322	2232	1106	1504	1963	1514	1623	2737	1050	1619	1600	1661	1650	2629	1004	1708	1510	2	0	1	0	0	0	0	0
Africa	ZAF_115	2842	879	1084	3214	2017	1738	2305	440	2074	1986	2584	1408	2373	1166	1609	2077	1679	1750	2835	1144	1737	2040	1886	1833	2882	1013	1730	1653	7	0	0	0	0	0	0	1
Africa	ZAF_116	2848	884	1088	3220	2023	1738	2307	438	2081	1991	2589	1413	2377	1167	1607	2084	1657	1803	2850	987	1875	1978	2047	1702	2946	1117	1748	1617	7	0	0	0	0	0	0	1
Africa	ZAF_118	2842	883	1087	3217	2020	1737	2303	438	2078	1989	2590	1406	2373	1168	1608	2078	1681	1751	2838	1145	1739	2043	1888	1837	2882	1013	1729	1654	7	0	0	0	0	0	0	1
Africa	ZAF_119	2844	885	1087	3216	2022	1737	2303	439	2078	1989	2589	1407	2373	1168	1608	2080	1604	1719	2901	1110	1699	1705	1762	1751	2785	1056	1832	1604	7	0	0	0	0	0	0	1
Africa	ZAF_12	2880	886	1095	3223	2023	1740	2305	439	2079	1992	2588	1411	2378	1166	1609	2083	2024	1741	2307	439	2083	1991	2588	1410	2376	1167	1610	2084	4	0	0	0	1	0	0	0
Africa	ZAF_120	2852	888	1090	3221	2025	1741	2305	438	2080	1991	2591	1408	2378	1168	1611	2083	1631	1797	2715	1083	1737	2115	1909	1879	2775	1020	1657	1713	1	1	0	0	0	0	0	0
Africa	ZAF_121	2818	872	1075	3181	1998	1721	2278	437	2063	1967	2564	1396	2347	1159	1597	2052	1570	1798	2759	1132	1695	2069	1829	1848	2835	1021	1665	1618	2	0	1	0	0	0	0	0
Africa	ZAF_123	2846	880	1086	3223	2018	1736	2310	438	2077	1988	2590	1409	2375	1168	1608	2080	1605	1776	2897	1196	1679	2032	1839	1863	2889	1048	1737	1651	2	0	1	0	0	0	0	0
Africa	ZAF_124	2879	883	1089	3225	2021	1738	2309	439	2079	1991	2587	1414	2378	1166	1607	2082	1619	1807	2800	1023	1710	1760	1625	1771	2860	995	1707	1659	7	0	0	0	0	0	0	1
Africa	ZAF_125	2844	882	1087	3219	2018	1738	2305	438	2077	1991	2590	1409	2374	1166	1608	2079	1652	1732	2828	1035	1734	1733	1759	1735	2788	1052	1742	1678	2	0	1	0	0	0	0	0
Africa	ZAF_126	2847	887	1088	3221	2022	1738	2306	439	2078	1992	2589	1411	2377	1166	1608	2082	1626	1756	2872	1183	1717	2030	1876	1847	2887	1045	1744	1621	3	0	0	1	0	0	0	0
Africa	ZAF_128	2830	872	1079	3193	2006	1724	2291	437	2064	1979	2578	1400	2356	1162	1596	2068	1675	1744	2820	1135	1732	2028	1875	1823	2872	1008	1719	1641	2	0	1	0	0	0	0	0
Africa	ZAF_129	2850	887	1088	3221	2022	1739	2306	439	2079	1991	2589	1411	2376	1168	1608	2083	2021	1738	2308	439	2082	1991	2588	1411	2376	1169	1609	2083	7	0	0	0	0	0	0	1
Africa	ZAF_13	2847	887	1088	3221	2022	1738	2303	438	2079	1991	2590	1409	2373	1167	1608	2082	1671	1738	2853	1059	1737	1721	1678	1767	2856	1005	1753	1650	7	0	0	0	0	0	0	1
Africa	ZAF_130	2748	841	1033	3071	1929	1645	2197	425	1986	1895	2474	1344	2258	1117	1533	1979	1541	1639	2773	1058	1620	1636	1688	1665	2673	1003	1746	1533	2	0	1	0	0	0	0	0
Africa	ZAF_132	2830	875	1079	3191	2005	1725	2290	438	2063	1973	2573	1398	2355	1164	1598	2065	1644	1792	2827	984	1861	1959	2032	1690	2914	1112	1740	1607	7	0	0	0	0	0	0	1
Africa	ZAF_133	2844	880	1088	3217	2020	1737	2306	437	2080	1989	2590	1412	2373	1166	1608	2081	1611	1752	2804	1084	1738	1677	1656	1740	2811	1069	1749	1604	2	0	1	0	0	0	0	0
Africa	ZAF_136	2815	880	1090	3185	2005	1725	2284	436	2062	1973	2572	1396	2351	1165	1593	2069	1602	1804	2873	1153	1613	2052	1813	1777	2937	1022	1687	1645	2	0	1	0	0	0	0	0
Africa	ZAF_137	2874	881	1086	3217	2020	1736	2306	438	2074	1992	2590	1410	2372	1163	1608	2081	1679	1751	2839	1144	1737	2043	1887	1834	2894	1013	1735	1662	7	0	0	0	0	0	0	1
Africa	ZAF_14	2844	881	1085	3222	2017	1738	2307	437	2076	1991	2590	1407	2376	1167	1607	2079	1614	1733	2887	1040	1851	1847	2026	1682	2859	1151	1805	1567	6	0	0	0	0	0	1	0
Africa	ZAF_141	2851	886	1089	3216	2022	1738	2305	437	2081	1991	2591	1411	2376	1167	1607	2082	1694	1718	2854	1045	1839	1899	2075	1672	2840	1148	1794	1633	7	0	0	0	0	0	0	1
Africa	ZAF_144	2802	874	1079	3173	1998	1712	2275	437	2046	1971	2559	1387	2344	1159	1578	2060	1591	1736	2770	1075	1721	1654	1638	1723	2770	1062	1726	1586	2	0	1	0	0	0	0	0
Africa	ZAF_148	2873	880	1094	3217	2018	1734	2307	439	2078	1988	2588	1412	2373	1167	1607	2079	1624	1789	2863	1010	1803	1904	2028	1642	2898	1178	1748	1645	7	0	0	0	0	0	0	1
Africa	ZAF_149	2792	867	1072	3169	1982	1695	2266	428	2038	1948	2537	1381	2334	1144	1569	2040	1577	1690	2833	1016	1815	1819	1995	1654	2807	1132	1765	1532	2	0	1	0	0	0	0	0
Africa	ZAF_15	2866	882	1090	3216	2023	1738	2304	438	2082	1989	2591	1411	2373	1168	1610	2082	1650	1693	2875	1076	1916	1835	2055	1725	2848	1148	1846	1538	2	0	1	0	0	0	0	0
Africa	ZAF_150	2849	885	1090	3217	2024	1739	2304	440	2081	1991	2588	1410	2377	1168	1608	2081	1619	1809	2797	1023	1708	1755	1625	1770	2861	998	1706	1658	7	0	0	0	0	0	0	1
Africa	ZAF_151	2852	886	1091	3222	2023	1738	2308	438	2078	1992	2590	1411	2378	1164	1610	2082	1562	1732	2829	1070	1719	1705	1683	1750	2812	1081	1704	1611	4	0	0	0	1	0	0	0
Africa	ZAF_16	2651	817	1015	2990	1890	1619	2127	410	1931	1840	2404	1295	2194	1083	1507	1933	1534	1644	2577	1069	1593	1946	1773	1689	2656	933	1590	1513	2	0	1	0	0	0	0	0
Africa	ZAF_161	2802	866	1077	3182	1993	1713	2281	436	2059	1960	2559	1398	2347	1161	1587	2056	1633	1714	2796	1180	1678	2022	1830	1808	2845	1000	1699	1592	3	0	0	1	0	0	0	0
Africa	ZAF_162	2879	884	1094	3222	2024	1739	2305	437	2083	1990	2588	1411	2379	1166	1607	2082	1617	1809	2800	1023	1708	1759	1627	1773	2860	995	1707	1660	7	0	0	0	0	0	0	1
Africa	ZAF_163	2850	885	1090	3222	2023	1739	2307	439	2078	1992	2589	1410	2379	1166	1608	2082	1629	1796	2716	1083	1738	2115	1909	1879	2774	1018	1657	1712	7	0	0	0	0	0	0	1
Africa	ZAF_166	2881	886	1090	3223	2021	1742	2309	438	2078	1991	2589	1412	2378	1168	1610	2085	2021	1742	2310	438	2082	1991	2588	1410	2377	1169	1612	2085	7	0	0	0	0	0	0	1
Africa	ZAF_167	2664	821	1009	3030	1892	1626	2148	412	1932	1885	2437	1311	2219	1090	1502	1951	1499	1612	2737	1045	1605	1600	1647	1639	2624	983	1705	1497	2	0	1	0	0	0	0	0
Africa	ZAF_168	2877	885	1094	3221	2020	1738	2308	437	2079	1991	2589	1409	2380	1167	1605	2080	1654	1803	2852	988	1875	1979	2049	1702	2945	1114	1748	1616	7	0	0	0	0	0	0	1
Africa	ZAF_17	2843	884	1090	3211	2017	1734	2305	439	2076	1987	2589	1409	2371	1168	1607	2079	1692	1715	2852	1043	1838	1896	2076	1669	2835	1146	1790	1630	7	0	0	0	0	0	0	1
Africa	ZAF_170	2878	886	1094	3220	2021	1739	2307	436	2080	1991	2592	1408	2379	1167	1609	2080	1694	1719	2855	1047	1842	1899	2077	1671	2841	1149	1797	1634	7	0	0	0	0	0	0	1
Africa	ZAF_173	2880	886	1089	3218	2021	1738	2307	438	2079	1993	2591	1412	2376	1165	1608	2081	1600	1736	2903	1178	1683	2008	1887	1853	2847	1023	1776	1621	6	0	0	0	0	0	1	0
Africa	ZAF_174	2845	887	1093	3221	2022	1738	2305	438	2078	1991	2590	1410	2374	1167	1608	2083	1627	1757	2871	1185	1715	2032	1877	1848	2886	1042	1744	1620	7	0	0	0	0	0	0	1
Africa	ZAF_175	2847	885	1088	3217	2021	1739	2304	440	2078	1992	2589	1413	2373	1167	1608	2083	1601	1750	2973	1075	1835	1867	2016	1764	2888	1155	1821	1613	2	0	1	0	0	0	0	0
Africa	ZAF_177	2844	883	1087	3221	2021	1737	2303	440	2076	1992	2587	1411	2373	1166	1606	2082	1606	1720	2900	1110	1697	1708	1760	1748	2785	1054	1833	1604	7	0	0	0	0	0	0	1
Africa	ZAF_178	2780	851	1055	3131	1958	1686	2246	426	2022	1935	2525	1368	2313	1137	1562	2018	1577	1655	2776	1056	1660	1666	1656	1678	2737	1038	1668	1594	2	0	1	0	0	0	0	0
Africa	ZAF_179	2842	882	1086	3219	2018	1739	2305	439	2077	1991	2588	1409	2376	1166	1608	2077	1679	1751	2841	1145	1738	2043	1889	1836	2883	1013	1730	1654	7	0	0	0	0	0	0	1
Africa	ZAF_18	2849	886	1088	3219	2022	1739	2306	440	2079	1994	2589	1415	2375	1165	1608	2083	1620	1807	2798	1024	1709	1757	1626	1771	2861	997	1706	1658	7	0	0	0	0	0	0	1
Africa	ZAF_182	2847	885	1089	3222	2022	1738	2306	439	2080	1989	2588	1414	2374	1167	1608	2084	1627	1755	2872	1183	1717	2031	1876	1848	2887	1045	1743	1621	7	0	0	0	0	0	0	1
Africa	ZAF_185	2846	887	1094	3221	2022	1741	2305	438	2079	1993	2590	1409	2378	1167	1609	2081	1671	1791	2855	1189	1674	2132	1860	1808	2988	1049	1656	1671	7	0	0	0	0	0	0	1
Africa	ZAF_186	2848	887	1090	3225	2022	1739	2306	438	2078	1992	2589	1411	2376	1165	1608	2082	1655	1804	2852	986	1877	1978	2050	1702	2945	1117	1748	1617	7	0	0	0	0	0	0	1
Africa	ZAF_19	2849	886	1089	3219	2023	1740	2307	439	2078	1992	2590	1413	2375	1166	1611	2085	1563	1731	2829	1071	1719	1702	1683	1752	2811	1083	1703	1611	6	0	0	0	0	0	1	0
Africa	ZAF_192	2876	882	1091	3221	2021	1737	2304	438	2077	1990	2589	1407	2374	1167	1607	2080	1560	1760	2950	1024	1853	1835	2036	1729	2871	1191	1801	1613	2	0	1	0	0	0	0	0
Africa	ZAF_195	2846	886	1094	3217	2022	1740	2305	439	2079	1991	2588	1411	2376	1168	1608	2083	1630	1796	2715	1083	1736	2115	1911	1880	2771	1018	1655	1712	7	0	0	0	0	0	0	1
Africa	ZAF_196	2846	886	1089	3221	2022	1739	2308	439	2079	1992	2589	1414	2375	1166	1609	2084	0	3	0	0	7	3	0	3	0	1	2	0	7	0	0	0	0	0	0	1
Africa	ZAF_198	2807	879	1080	3184	1997	1721	2277	437	2056	1970	2557	1400	2346	1159	1586	2064	1626	1750	2797	1161	1686	2012	1805	1807	2882	1042	1657	1628	3	0	0	1	0	0	0	0
Africa	ZAF_199	2775	861	1058	3128	1967	1694	2237	429	2017	1949	2529	1368	2304	1139	1564	2029	1567	1725	2819	1168	1629	1972	1806	1807	2795	1027	1695	1616	2	0	1	0	0	0	0	0
Africa	ZAF_2	2820	874	1083	3197	2010	1727	2288	437	2069	1982	2582	1400	2356	1162	1601	2066	1674	1742	2827	1140	1728	2030	1880	1828	2869	1006	1721	1641	7	0	0	0	0	0	0	1
Africa	ZAF_20	2878	886	1093	3221	2024	1739	2304	439	2079	1989	2587	1409	2376	1167	1608	2083	1602	1737	2901	1177	1679	2008	1887	1853	2845	1020	1777	1622	6	0	0	0	0	0	1	0
Africa	ZAF_201	2874	879	1089	3222	2020	1735	2304	438	2079	1991	2591	1405	2377	1166	1607	2074	1680	1751	2840	1145	1739	2046	1888	1835	2893	1009	1735	1660	7	0	0	0	0	0	0	1
Africa	ZAF_203	2821	880	1081	3183	1998	1722	2271	434	2056	1967	2557	1392	2347	1154	1591	2054	1674	1696	2820	1037	1819	1877	2056	1653	2803	1134	1775	1613	7	0	0	0	0	0	0	1
Africa	ZAF_204	2730	844	1039	3102	1932	1655	2232	421	2013	1900	2482	1371	2290	1118	1541	1985	1609	1684	2740	1088	1675	1956	1802	1774	2765	970	1661	1589	2	0	1	0	0	0	0	0
Africa	ZAF_207	2849	876	1088	3210	2005	1724	2295	437	2061	1979	2573	1396	2366	1163	1592	2066	1597	1710	2887	1104	1697	1701	1755	1739	2779	1047	1826	1593	7	0	0	0	0	0	0	1
Africa	ZAF_21	2833	881	1087	3208	2016	1737	2296	436	2070	1987	2582	1406	2365	1164	1604	2078	1619	1728	2874	980	1877	1824	2063	1665	2833	1181	1759	1613	3	0	0	1	0	0	0	0
Africa	ZAF_213	2581	808	994	2902	1850	1596	2078	405	1901	1827	2370	1271	2163	1084	1459	1902	1546	1598	2591	1066	1583	1853	1723	1672	2630	924	1587	1516	3	0	0	1	0	0	0	0
Africa	ZAF_214	2831	882	1088	3209	2014	1736	2299	438	2069	1985	2582	1404	2367	1164	1605	2076	1637	1763	2782	1143	1702	2091	1898	1822	2845	1001	1709	1615	6	0	0	0	0	0	1	0
Africa	ZAF_218	2822	876	1075	3191	1999	1719	2279	435	2061	1970	2555	1403	2351	1154	1586	2061	1634	1710	2806	1023	1717	1718	1741	1724	2766	1043	1717	1665	2	0	1	0	0	0	0	0
Africa	ZAF_219	2839	882	1092	3217	2016	1739	2303	436	2078	1989	2589	1407	2374	1169	1606	2078	1605	1776	2865	1067	1718	1642	1701	1673	2836	1111	1788	1613	7	0	0	0	0	0	0	1
Africa	ZAF_223	2834	878	1084	3215	2009	1735	2301	436	2070	1986	2582	1402	2372	1165	1602	2071	1599	1772	2862	1064	1715	1638	1697	1665	2832	1109	1785	1606	2	0	1	0	0	0	0	0
Africa	ZAF_23	2851	885	1090	3218	2023	1736	2305	435	2082	1990	2591	1409	2377	1168	1605	2082	1622	1730	2854	1095	1676	1783	1713	1804	2789	1013	1747	1672	3	0	0	1	0	0	0	0
Africa	ZAF_231	2777	851	1055	3171	1977	1692	2259	427	2032	1959	2548	1378	2324	1135	1573	2031	1563	1739	2823	1043	1680	1610	1666	1634	2784	1087	1749	1569	2	0	1	0	0	0	0	0
Africa	ZAF_232	2845	889	1091	3220	2022	1737	2307	436	2080	1989	2591	1409	2375	1169	1607	2084	1683	1680	2938	1060	1834	1883	2090	1663	2895	1190	1759	1642	2	0	1	0	0	0	0	0
Africa	ZAF_235	2610	795	993	2880	1837	1576	2081	412	1865	1813	2358	1275	2122	1067	1471	1901	1488	1609	2514	1060	1546	1895	1723	1646	2587	921	1569	1471	2	0	1	0	0	0	0	0
Africa	ZAF_236	2616	831	992	2924	1882	1602	2108	391	1917	1812	2369	1278	2182	1072	1480	1925	1514	1614	2590	1066	1526	1901	1705	1667	2687	950	1562	1526	2	0	1	0	0	0	0	0
Africa	ZAF_239	2754	839	1031	3067	1922	1643	2208	425	1978	1894	2469	1345	2266	1120	1525	1983	1545	1633	2772	1061	1621	1632	1679	1667	2674	1000	1754	1539	2	0	1	0	0	0	0	0
Africa	ZAF_24	2797	869	1074	3179	1994	1710	2276	435	2056	1963	2550	1401	2341	1152	1581	2056	1582	1689	2867	1095	1675	1678	1740	1729	2758	1043	1800	1580	2	0	1	0	0	0	0	0
Africa	ZAF_240	2844	882	1087	3218	2020	1737	2306	439	2077	1989	2589	1410	2373	1168	1608	2082	1607	1719	2899	1110	1699	1706	1762	1746	2786	1056	1833	1604	7	0	0	0	0	0	0	1
Africa	ZAF_244	2734	848	1052	3103	1957	1670	2239	425	2010	1918	2513	1363	2288	1131	1559	2018	1608	1686	2723	1034	1675	1615	1633	1616	2759	1042	1693	1562	3	0	0	1	0	0	0	0
Africa	ZAF_245	2799	860	1059	3124	1969	1693	2234	432	2020	1938	2524	1364	2302	1143	1567	2025	1523	1720	2870	1002	1802	1778	1983	1678	2792	1166	1751	1566	2	0	1	0	0	0	0	0
Africa	ZAF_246	2847	886	1087	3226	2023	1738	2303	439	2077	1993	2590	1410	2373	1167	1607	2084	1627	1756	2872	1184	1716	2032	1876	1847	2886	1044	1744	1621	6	0	0	0	0	0	1	0
Africa	ZAF_25	2835	880	1078	3198	2004	1732	2291	435	2068	1976	2569	1404	2362	1159	1599	2064	1639	1720	2815	1027	1722	1724	1748	1727	2773	1047	1732	1670	2	0	1	0	0	0	0	0
Africa	ZAF_251	2846	886	1093	3221	2021	1743	2304	436	2080	1992	2588	1411	2377	1168	1606	2084	1657	1803	2851	986	1876	1976	2052	1700	2945	1118	1746	1618	7	0	0	0	0	0	0	1
Africa	ZAF_252	2845	887	1087	3215	2020	1736	2297	437	2076	1991	2586	1405	2374	1165	1604	2077	2019	1737	2299	439	2078	1990	2583	1406	2374	1166	1605	2077	6	0	0	0	0	0	1	0
Africa	ZAF_253	2870	882	1092	3219	2015	1739	2308	438	2078	1987	2587	1411	2375	1169	1607	2081	1640	1764	2787	1149	1708	2098	1901	1826	2865	1003	1718	1623	6	0	0	0	0	0	1	0
Africa	ZAF_255	2843	883	1087	3218	2020	1737	2305	440	2077	1992	2589	1413	2371	1165	1609	2081	1564	1760	2946	1022	1855	1836	2035	1728	2862	1192	1792	1611	2	0	1	0	0	0	0	0
Africa	ZAF_256	2587	795	976	2933	1832	1575	2099	400	1902	1813	2364	1288	2158	1067	1455	1888	1522	1609	2580	1033	1582	1855	1705	1683	2615	923	1589	1501	2	0	1	0	0	0	0	0
Africa	ZAF_257	2845	883	1087	3219	2018	1736	2307	437	2077	1992	2590	1410	2375	1165	1606	2080	1612	1734	2890	1039	1847	1848	2026	1683	2860	1151	1805	1567	6	0	0	0	0	0	1	0
Africa	ZAF_259	2827	871	1078	3187	2000	1722	2291	437	2062	1974	2574	1398	2353	1161	1598	2061	1599	1720	2864	1036	1833	1828	2010	1662	2834	1143	1795	1551	6	0	0	0	0	0	1	0
Africa	ZAF_26	2834	884	1082	3202	2011	1733	2291	436	2068	1985	2577	1401	2365	1162	1600	2070	1663	1736	2835	1054	1726	1707	1668	1755	2844	1003	1745	1641	6	0	0	0	0	0	1	0
Africa	ZAF_263	2841	880	1091	3214	2017	1735	2305	436	2077	1990	2591	1405	2376	1167	1605	2076	1585	1765	2800	1139	1716	2084	1876	1838	2870	1012	1682	1594	3	0	0	1	0	0	0	0
Africa	ZAF_264	2842	880	1088	3214	2017	1737	2306	439	2076	1989	2589	1411	2371	1168	1608	2080	1681	1752	2836	1145	1739	2043	1888	1836	2882	1013	1729	1654	7	0	0	0	0	0	0	1
Africa	ZAF_266	2841	870	1073	3188	1991	1717	2286	435	2057	1968	2559	1402	2349	1155	1588	2056	1657	1737	2814	1131	1717	2021	1858	1820	2867	1002	1718	1640	2	0	1	0	0	0	0	0
Africa	ZAF_269	2849	886	1089	3218	2023	1735	2306	437	2081	1989	2590	1411	2375	1167	1607	2082	1618	1806	2795	1022	1707	1755	1624	1771	2858	997	1704	1659	3	0	0	1	0	0	0	0
Africa	ZAF_27	2846	882	1088	3219	2019	1736	2304	437	2082	1988	2590	1409	2374	1168	1607	2078	1613	1734	2889	1039	1846	1846	2026	1683	2858	1152	1805	1568	6	0	0	0	0	0	1	0
Africa	ZAF_270	2840	882	1092	3215	2017	1738	2303	437	2078	1990	2587	1411	2372	1166	1606	2080	1649	1732	2830	1036	1733	1734	1760	1738	2785	1052	1741	1677	7	0	0	0	0	0	0	1
Africa	ZAF_275	2840	882	1090	3221	2017	1738	2305	438	2077	1990	2588	1408	2376	1167	1607	2077	1682	1753	2837	1145	1738	2046	1888	1835	2882	1010	1729	1654	7	0	0	0	0	0	0	1
Africa	ZAF_277	2575	808	1000	2945	1855	1573	2108	404	1891	1836	2385	1263	2184	1066	1461	1888	1467	1567	2650	1018	1563	1568	1641	1588	2531	959	1673	1455	7	0	0	0	0	0	0	1
Africa	ZAF_28	2847	887	1094	3219	2021	1742	2304	438	2077	1993	2587	1410	2377	1168	1606	2083	0	3	0	0	4	1	0	0	1	0	0	0	1	1	0	0	0	0	0	0
Africa	ZAF_284	2842	881	1087	3212	2018	1734	2304	437	2071	1989	2586	1407	2370	1162	1606	2078	1686	1638	2877	1091	1671	1680	1751	1637	2826	1047	1757	1621	3	0	0	1	0	0	0	0
Africa	ZAF_286	2615	794	980	2975	1846	1582	2142	400	1908	1836	2391	1305	2188	1057	1478	1900	1507	1545	2679	952	1662	1682	1883	1526	2579	1056	1638	1484	2	0	1	0	0	0	0	0
Africa	ZAF_287	2841	883	1093	3216	2020	1736	2305	436	2079	1989	2592	1408	2373	1168	1607	2080	1606	1719	2901	1110	1701	1704	1765	1748	2783	1056	1831	1604	7	0	0	0	0	0	0	1
Africa	ZAF_288	2823	875	1079	3201	2007	1726	2289	438	2062	1976	2574	1395	2358	1162	1599	2064	1599	1707	2884	1105	1693	1691	1746	1735	2771	1045	1821	1589	7	0	0	0	0	0	0	1
Africa	ZAF_29	2849	885	1091	3219	2023	1739	2305	438	2082	1991	2591	1410	2378	1168	1608	2081	1628	1796	2717	1083	1737	2114	1910	1879	2774	1020	1655	1712	1	1	0	0	0	0	0	0
Africa	ZAF_290	2847	884	1089	3217	2023	1737	2304	438	2083	1991	2592	1411	2376	1168	1608	2081	1693	1719	2856	1045	1840	1899	2075	1674	2838	1148	1794	1633	7	0	0	0	0	0	0	1
Africa	ZAF_293	2849	884	1086	3227	2018	1740	2312	438	2077	1992	2589	1409	2383	1168	1607	2080	0	1	0	0	13	2	0	0	0	1	4	0	1	1	0	0	0	0	0	0
Africa	ZAF_295	2847	875	1087	3205	2003	1724	2294	436	2058	1979	2570	1396	2364	1159	1591	2064	1610	1780	2855	1007	1790	1888	2007	1630	2882	1171	1735	1630	7	0	0	0	0	0	0	1
Africa	ZAF_297	2839	881	1092	3218	2017	1739	2304	438	2080	1989	2587	1410	2376	1169	1605	2078	1683	1751	2838	1147	1738	2043	1889	1836	2881	1011	1730	1652	7	0	0	0	0	0	0	1
Africa	ZAF_298	2843	883	1088	3215	2017	1735	2307	439	2075	1989	2589	1410	2371	1166	1608	2080	1640	1761	2786	1148	1707	2098	1900	1828	2850	1001	1712	1621	7	0	0	0	0	0	0	1
Africa	ZAF_3	2755	858	1065	3125	1963	1677	2245	432	2025	1931	2524	1374	2305	1143	1559	2023	1640	1672	2690	1063	1745	1573	1675	1645	2681	1060	1781	1545	3	0	0	1	0	0	0	0
Africa	ZAF_301	2607	808	981	2972	1843	1603	2132	396	1904	1828	2372	1286	2206	1058	1482	1888	1493	1638	2551	978	1639	1573	1525	1640	2588	941	1631	1464	3	0	0	1	0	0	0	0
Africa	ZAF_302	2846	886	1087	3222	2020	1740	2307	438	2079	1992	2588	1409	2382	1167	1607	2079	1692	1719	2857	1044	1843	1899	2073	1673	2840	1148	1794	1633	7	0	0	0	0	0	0	1
Africa	ZAF_303	2838	880	1086	3217	2017	1736	2306	438	2076	1986	2587	1407	2374	1169	1607	2078	1679	1749	2837	1145	1736	2040	1887	1834	2878	1013	1729	1654	7	0	0	0	0	0	0	1
Africa	ZAF_304	2848	884	1090	3219	2024	1739	2304	439	2082	1991	2591	1410	2376	1168	1609	2081	1671	1790	2855	1187	1674	2133	1861	1809	2987	1049	1656	1672	7	0	0	0	0	0	0	1
Africa	ZAF_31	2851	885	1091	3221	2023	1739	2306	436	2083	1990	2591	1410	2378	1168	1608	2082	0	1	0	0	6	1	0	0	0	1	3	0	1	1	0	0	0	0	0	0
Africa	ZAF_310	2611	803	992	2983	1844	1594	2143	399	1898	1832	2399	1278	2202	1064	1488	1889	1529	1655	2652	1061	1586	1896	1687	1722	2728	916	1557	1535	2	0	1	0	0	0	0	0
Africa	ZAF_311	2848	884	1089	3217	2023	1738	2304	439	2081	1991	2590	1412	2374	1167	1608	2082	1621	1742	2862	1063	1840	1904	2100	1708	2793	1181	1822	1610	2	0	1	0	0	0	0	0
Africa	ZAF_312	2775	865	1060	3148	1971	1692	2246	432	2038	1946	2540	1378	2313	1150	1568	2029	1590	1733	2776	1087	1729	1670	1642	1699	2824	1087	1695	1580	2	0	1	0	0	0	0	0
Africa	ZAF_313	2879	882	1089	3218	2021	1736	2305	438	2080	1989	2590	1411	2373	1167	1607	2082	1631	1774	2853	1106	1755	1704	1678	1731	2904	1111	1752	1618	3	0	0	1	0	0	0	0
Africa	ZAF_316	2877	880	1087	3219	2015	1738	2309	437	2075	1990	2591	1411	2371	1168	1608	2082	1584	1818	2881	1147	1752	2008	1851	1830	2957	1100	1715	1628	3	0	0	1	0	0	0	0
Africa	ZAF_319	2743	852	1062	3123	1962	1683	2248	430	2021	1930	2512	1366	2319	1138	1553	2018	1602	1686	2736	1006	1689	1690	1709	1689	2707	1023	1691	1635	2	0	1	0	0	0	0	0
Africa	ZAF_32	2848	876	1086	3202	2003	1724	2295	436	2060	1979	2574	1397	2363	1162	1593	2066	1670	1746	2825	1136	1728	2033	1875	1826	2872	1002	1725	1649	7	0	0	0	0	0	0	1
Africa	ZAF_323	2807	871	1077	3169	1988	1717	2278	433	2041	1968	2558	1383	2347	1151	1589	2047	1635	1719	2767	1186	1683	2014	1834	1758	2852	1027	1699	1561	2	0	1	0	0	0	0	0
Africa	ZAF_328	2844	880	1088	3214	2018	1736	2304	438	2079	1989	2590	1408	2374	1168	1607	2077	1605	1776	2864	1066	1719	1641	1699	1672	2839	1112	1789	1613	3	0	0	1	0	0	0	0
Africa	ZAF_329	2843	883	1085	3217	2018	1737	2302	437	2077	1988	2588	1408	2371	1165	1609	2077	1626	1783	2841	1074	1725	1652	1646	1707	2850	1106	1749	1650	3	0	0	1	0	0	0	0
Africa	ZAF_33	2857	885	1090	3222	2023	1741	2308	439	2079	1990	2588	1413	2376	1167	1611	2085	1619	1809	2797	1023	1709	1757	1626	1771	2861	998	1708	1660	7	0	0	0	0	0	0	1
Africa	ZAF_330	2847	886	1094	3219	2022	1739	2305	438	2078	1993	2590	1411	2375	1166	1608	2082	1617	1811	2798	1023	1709	1755	1626	1770	2860	998	1705	1658	7	0	0	0	0	0	0	1
Africa	ZAF_333	2846	886	1094	3223	2022	1742	2304	437	2081	1992	2588	1410	2379	1168	1606	2082	0	3	0	0	6	2	0	1	0	0	0	0	1	1	0	0	0	0	0	0
Africa	ZAF_334	2762	844	1047	3073	1955	1683	2220	435	2007	1921	2499	1362	2284	1135	1560	2012	1567	1669	2782	954	1819	1754	1997	1616	2746	1148	1711	1567	3	0	0	1	0	0	0	0
Africa	ZAF_336	2845	886	1093	3223	2019	1739	2307	438	2075	1990	2590	1409	2374	1167	1609	2082	1611	1813	2912	1160	1619	2063	1825	1789	2971	1026	1707	1655	3	0	0	1	0	0	0	0
Africa	ZAF_337	2842	880	1087	3218	2018	1738	2304	436	2078	1988	2589	1408	2373	1167	1607	2080	1585	1764	2802	1137	1716	2085	1876	1841	2870	1012	1683	1595	3	0	0	1	0	0	0	0
Africa	ZAF_338	2842	880	1087	3221	2015	1738	2308	438	2077	1990	2590	1409	2376	1167	1608	2076	1681	1752	2838	1145	1742	2045	1889	1836	2882	1011	1730	1654	7	0	0	0	0	0	0	1
Africa	ZAF_340	2820	874	1079	3194	2006	1719	2287	437	2067	1971	2570	1402	2354	1161	1593	2065	1584	1733	2948	1067	1823	1854	1996	1753	2866	1148	1797	1600	2	0	1	0	0	0	0	0
Africa	ZAF_341	2840	881	1089	3212	2017	1736	2305	439	2076	1989	2588	1409	2372	1167	1607	2078	1688	1640	2879	1092	1672	1680	1754	1638	2826	1049	1756	1621	2	0	1	0	0	0	0	0
Africa	ZAF_345	2849	887	1089	3221	2021	1739	2307	439	2078	1992	2589	1411	2376	1167	1608	2082	1619	1809	2797	1023	1709	1756	1624	1770	2861	997	1706	1658	7	0	0	0	0	0	0	1
Africa	ZAF_347	2850	886	1087	3221	2023	1740	2305	439	2079	1992	2589	1412	2375	1167	1608	2084	1620	1809	2796	1023	1709	1757	1626	1770	2861	998	1707	1659	7	0	0	0	0	0	0	1
Africa	ZAF_35	2848	886	1090	3219	2021	1739	2307	439	2079	1991	2589	1411	2376	1168	1608	2082	1656	1803	2851	987	1875	1977	2050	1702	2944	1117	1748	1617	7	0	0	0	0	0	0	1
Africa	ZAF_350	2845	887	1092	3215	2022	1739	2305	438	2079	1990	2589	1411	2374	1168	1608	2083	1603	1736	2900	1177	1681	2007	1887	1853	2845	1022	1771	1621	7	0	0	0	0	0	0	1
Africa	ZAF_359	2733	857	1035	3094	1943	1675	2225	412	2005	1912	2485	1362	2290	1114	1549	2003	1619	1686	2745	1092	1664	1962	1812	1773	2776	971	1670	1592	2	0	1	0	0	0	0	0
Africa	ZAF_36	2824	874	1079	3199	2005	1725	2289	438	2061	1976	2574	1397	2356	1162	1599	2063	1610	1775	2846	1002	1798	1885	2015	1635	2860	1172	1734	1627	2	0	1	0	0	0	0	0
Africa	ZAF_362	2590	801	984	2887	1843	1582	2079	400	1866	1822	2371	1252	2146	1066	1467	1887	1479	1581	2595	888	1711	1647	1898	1512	2560	1068	1633	1462	3	0	0	1	0	0	0	0
Africa	ZAF_363	2841	880	1090	3215	2018	1736	2304	437	2079	1989	2592	1407	2373	1167	1608	2077	1604	1777	2864	1066	1718	1642	1701	1671	2837	1111	1789	1613	3	0	0	1	0	0	0	0
Africa	ZAF_364	2876	880	1089	3217	2020	1738	2306	439	2082	1987	2588	1409	2378	1169	1609	2077	1681	1751	2839	1144	1738	2043	1889	1837	2895	1013	1736	1662	7	0	0	0	0	0	0	1
Africa	ZAF_366	2728	859	1054	3113	1943	1672	2208	428	2008	1920	2506	1354	2279	1140	1546	2000	1528	1739	2788	1116	1693	1931	1803	1768	2827	1060	1647	1568	2	0	1	0	0	0	0	0
Africa	ZAF_367	2835	882	1089	3196	2011	1726	2293	432	2069	1980	2586	1399	2357	1166	1599	2075	1569	1721	2844	1034	1833	1801	2062	1624	2788	1248	1760	1583	3	0	0	1	0	0	0	0
Africa	ZAF_368	2842	883	1088	3216	2017	1739	2305	439	2078	1990	2589	1410	2374	1168	1608	2079	1640	1763	2788	1148	1707	2097	1901	1829	2852	1002	1712	1621	7	0	0	0	0	0	0	1
Africa	ZAF_369	2840	882	1090	3217	2018	1738	2304	438	2078	1989	2588	1409	2373	1167	1608	2078	1681	1751	2838	1146	1738	2044	1889	1836	2881	1012	1729	1653	7	0	0	0	0	0	0	1
Africa	ZAF_372	2849	886	1090	3225	2020	1740	2308	438	2078	1991	2590	1407	2381	1168	1608	2079	1629	1795	2716	1083	1738	2118	1910	1878	2774	1016	1655	1712	6	0	0	0	0	0	1	0
Africa	ZAF_373	2844	881	1089	3220	2021	1736	2303	437	2080	1989	2592	1407	2372	1168	1608	2080	1613	1734	2889	1040	1847	1846	2028	1683	2858	1152	1805	1567	7	0	0	0	0	0	0	1
Africa	ZAF_374	2843	882	1089	3217	2022	1734	2306	437	2080	1988	2590	1411	2373	1166	1607	2081	1605	1720	2901	1110	1699	1708	1761	1750	2785	1055	1832	1604	7	0	0	0	0	0	0	1
Africa	ZAF_375	2847	887	1094	3223	2022	1739	2307	437	2079	1988	2589	1410	2376	1168	1608	2084	1630	1796	2715	1083	1737	2115	1909	1880	2773	1018	1655	1712	7	0	0	0	0	0	0	1
Africa	ZAF_377	2632	810	995	2970	1858	1571	2131	413	1919	1824	2379	1298	2194	1076	1467	1900	1517	1615	2571	1043	1610	1919	1756	1681	2651	927	1575	1470	3	0	0	1	0	0	0	0
Africa	ZAF_379	2876	881	1086	3220	2023	1738	2306	439	2079	1988	2588	1412	2373	1165	1612	2082	1619	1726	2884	982	1881	1832	2067	1671	2860	1186	1769	1623	4	0	0	0	1	0	0	0
Africa	ZAF_38	2850	887	1091	3224	2021	1739	2310	439	2078	1991	2588	1412	2380	1165	1609	2081	1629	1796	2718	1082	1738	2117	1909	1879	2774	1018	1657	1712	1	1	0	0	0	0	0	0
Africa	ZAF_380	2841	883	1092	3220	2018	1739	2303	437	2079	1990	2589	1408	2375	1169	1605	2079	1608	1753	2807	1087	1737	1676	1656	1742	2809	1069	1749	1601	2	0	1	0	0	0	0	0
Africa	ZAF_383	2842	881	1088	3218	2019	1736	2305	437	2079	1989	2590	1409	2373	1167	1607	2080	1621	1787	2866	1009	1802	1901	2026	1643	2887	1180	1743	1639	7	0	0	0	0	0	0	1
Africa	ZAF_385	2680	831	1018	3040	1923	1630	2189	419	1961	1912	2460	1334	2267	1091	1510	1965	1588	1654	2695	1083	1644	1936	1791	1731	2719	965	1633	1569	7	0	0	0	0	0	0	1
Africa	ZAF_387	2575	811	982	2979	1839	1577	2128	405	1899	1818	2358	1292	2190	1065	1458	1896	1532	1615	2600	1034	1615	1866	1715	1688	2641	925	1568	1519	3	0	0	1	0	0	0	0
Africa	ZAF_39	2825	870	1077	3187	2002	1723	2287	437	2059	1975	2572	1399	2349	1158	1598	2064	1605	1772	2841	1004	1784	1893	2013	1627	2860	1171	1726	1631	7	0	0	0	0	0	0	1
Africa	ZAF_390	2853	876	1083	3203	2008	1726	2291	435	2063	1977	2575	1396	2359	1162	1596	2071	1633	1753	2771	1142	1697	2085	1888	1813	2847	997	1706	1613	7	0	0	0	0	0	0	1
Africa	ZAF_391	2849	887	1091	3220	2022	1742	2305	439	2079	1992	2589	1411	2377	1168	1610	2083	2021	1742	2308	439	2082	1990	2588	1411	2377	1169	1611	2083	6	0	0	0	0	0	1	0
Africa	ZAF_393	2844	888	1088	3226	2025	1739	2304	438	2081	1988	2587	1409	2378	1167	1608	2082	1628	1756	2871	1183	1716	2033	1874	1848	2887	1044	1743	1621	3	0	0	1	0	0	0	0
Africa	ZAF_396	2849	885	1094	3219	2023	1738	2306	438	2080	1990	2591	1410	2375	1167	1610	2083	1671	1740	2853	1060	1739	1721	1681	1770	2860	1005	1753	1652	2	0	1	0	0	0	0	0
Africa	ZAF_4	2847	885	1088	3222	2023	1741	2306	440	2078	1992	2588	1410	2378	1167	1609	2082	1658	1803	2849	987	1876	1977	2050	1700	2945	1117	1748	1618	7	0	0	0	0	0	0	1
Africa	ZAF_400	2882	885	1088	3222	2024	1739	2307	439	2082	1989	2587	1411	2380	1168	1609	2082	0	1	0	0	5	2	0	0	0	1	4	0	1	1	0	0	0	0	0	0
Africa	ZAF_402	2843	882	1092	3217	2021	1735	2305	438	2080	1988	2590	1410	2373	1168	1607	2081	1586	1818	2879	1146	1752	2007	1854	1831	2943	1103	1709	1626	3	0	0	1	0	0	0	0
Africa	ZAF_403	2820	875	1080	3189	2007	1731	2278	434	2068	1982	2571	1397	2360	1158	1596	2060	1631	1754	2760	1144	1701	2084	1888	1813	2832	995	1703	1601	7	0	0	0	0	0	0	1
Africa	ZAF_407	2851	886	1090	3219	2023	1738	2304	436	2082	1992	2592	1411	2374	1167	1607	2083	1618	1810	2798	1023	1708	1755	1623	1770	2862	998	1706	1658	7	0	0	0	0	0	0	1
Africa	ZAF_408	2830	882	1080	3194	2016	1730	2282	435	2072	1980	2572	1402	2360	1158	1600	2067	1682	1719	2741	1090	1784	1616	1698	1689	2749	1078	1813	1576	3	0	0	1	0	0	0	0
Africa	ZAF_409	2859	872	1078	3193	2006	1729	2290	435	2065	1977	2579	1397	2355	1164	1601	2067	1665	1745	2823	1138	1725	2031	1875	1827	2870	1004	1727	1659	7	0	0	0	0	0	0	1
Africa	ZAF_41	2860	886	1090	3223	2024	1741	2307	438	2078	1992	2589	1412	2377	1165	1611	2085	1629	1795	2719	1082	1737	2116	1910	1880	2775	1019	1657	1714	1	1	0	0	0	0	0	0
Africa	ZAF_412	2843	881	1087	3219	2017	1738	2306	437	2079	1988	2589	1412	2372	1167	1608	2080	1681	1752	2839	1145	1737	2043	1887	1835	2883	1013	1730	1654	7	0	0	0	0	0	0	1
Africa	ZAF_417	2848	885	1089	3213	2023	1738	2304	439	2079	1990	2588	1409	2376	1168	1607	2082	1601	1750	2973	1075	1835	1865	2014	1764	2890	1155	1821	1614	2	0	1	0	0	0	0	0
Africa	ZAF_419	2852	884	1091	3220	2024	1741	2307	439	2082	1991	2589	1411	2380	1168	1610	2082	0	1	0	0	6	0	0	0	0	1	3	0	1	1	0	0	0	0	0	0
Africa	ZAF_42	2812	871	1079	3191	2005	1715	2289	434	2073	1965	2568	1403	2355	1161	1591	2061	1670	1737	2811	1133	1727	2027	1866	1826	2856	1004	1712	1640	7	0	0	0	0	0	0	1
Africa	ZAF_426	2845	880	1088	3218	2017	1736	2306	435	2076	1990	2593	1407	2372	1167	1607	2080	1650	1731	2829	1035	1736	1734	1760	1736	2787	1051	1742	1678	7	0	0	0	0	0	0	1
Africa	ZAF_429	2847	886	1089	3222	2023	1739	2306	438	2077	1994	2589	1412	2376	1164	1608	2084	1623	1729	2857	1095	1677	1785	1717	1805	2788	1012	1747	1673	7	0	0	0	0	0	0	1
Africa	ZAF_43	2815	876	1078	3203	2007	1715	2292	430	2051	1979	2565	1392	2365	1141	1590	2057	1633	1716	2821	1020	1719	1720	1747	1727	2763	1036	1729	1662	3	0	0	1	0	0	0	0
Africa	ZAF_430	2881	884	1086	3226	2024	1741	2307	439	2079	1992	2587	1411	2380	1164	1611	2082	1656	1802	2855	987	1877	1978	2049	1704	2947	1114	1755	1618	1	1	0	0	0	0	0	0
Africa	ZAF_433	2848	884	1087	3220	2023	1738	2306	439	2082	1988	2587	1411	2379	1168	1608	2081	1693	1716	2857	1045	1839	1900	2074	1673	2840	1148	1794	1633	3	0	0	1	0	0	0	0
Africa	ZAF_436	2850	884	1089	3224	2020	1741	2310	438	2078	1992	2589	1410	2382	1166	1610	2080	1626	1795	2719	1082	1740	2116	1909	1879	2775	1018	1657	1712	7	0	0	0	0	0	0	1
Africa	ZAF_438	2596	799	982	2991	1857	1584	2120	400	1907	1828	2364	1292	2195	1055	1463	1898	1466	1562	2687	1016	1568	1575	1630	1621	2567	957	1664	1453	2	0	1	0	0	0	0	0
Africa	ZAF_439	2848	886	1089	3222	2021	1741	2306	438	2080	1991	2589	1410	2378	1168	1608	2081	1655	1803	2853	988	1875	1977	2049	1702	2946	1117	1748	1617	6	0	0	0	0	0	1	0
Africa	ZAF_44	2844	882	1085	3221	2019	1736	2306	438	2078	1988	2587	1413	2372	1166	1607	2081	1611	1751	2805	1084	1738	1677	1653	1741	2811	1069	1749	1603	2	0	1	0	0	0	0	0
Africa	ZAF_440	2849	886	1088	3222	2022	1739	2307	441	2078	1991	2586	1415	2376	1166	1608	2084	1630	1793	2717	1082	1737	2115	1909	1880	2774	1019	1655	1712	6	0	0	0	0	0	1	0
Africa	ZAF_441	2847	888	1095	3219	2022	1741	2306	437	2080	1991	2589	1412	2377	1167	1609	2084	2022	1742	2308	438	2082	1990	2588	1411	2377	1168	1610	2083	6	0	0	0	0	0	1	0
Africa	ZAF_442	2840	882	1093	3217	2018	1737	2305	438	2081	1991	2591	1409	2377	1167	1607	2076	1614	1736	2889	1040	1851	1844	2028	1682	2860	1154	1803	1566	7	0	0	0	0	0	0	1
Africa	ZAF_444	2722	850	1051	3124	1954	1664	2233	425	2026	1920	2507	1369	2302	1136	1539	2007	1559	1654	2783	946	1830	1770	2012	1622	2734	1151	1701	1555	3	0	0	1	0	0	0	0
Africa	ZAF_445	2845	885	1093	3218	2023	1736	2306	438	2081	1989	2590	1411	2375	1168	1607	2083	1602	1736	2901	1177	1680	2009	1887	1853	2844	1021	1771	1621	2	0	1	0	0	0	0	0
Africa	ZAF_446	2759	865	1063	3128	1979	1694	2241	428	2026	1947	2517	1379	2317	1135	1561	2036	1648	1715	2753	1120	1704	1990	1832	1793	2804	991	1682	1626	3	0	0	1	0	0	0	0
Africa	ZAF_449	2843	883	1087	3220	2020	1738	2303	438	2079	1988	2589	1407	2374	1168	1608	2078	1622	1789	2863	1008	1803	1902	2027	1642	2887	1180	1743	1639	7	0	0	0	0	0	0	1
Africa	ZAF_45	2831	874	1084	3214	2005	1731	2300	437	2064	1985	2576	1405	2367	1161	1600	2070	1631	1758	2784	1146	1703	2087	1887	1819	2843	996	1703	1616	2	0	1	0	0	0	0	0
Africa	ZAF_450	2843	883	1088	3216	2020	1737	2305	438	2078	1986	2588	1408	2373	1168	1608	2080	1604	1719	2899	1109	1699	1704	1761	1749	2785	1056	1833	1604	7	0	0	0	0	0	0	1
Africa	ZAF_451	2725	836	1024	3106	1925	1661	2218	416	1998	1900	2473	1357	2284	1110	1538	1980	1534	1630	2790	986	1798	1753	1958	1610	2738	1129	1703	1506	2	0	1	0	0	0	0	0
Africa	ZAF_457	2831	876	1078	3193	2012	1723	2298	438	2063	1981	2577	1403	2363	1157	1600	2067	1598	1764	2859	1059	1705	1631	1684	1664	2830	1103	1780	1606	3	0	0	1	0	0	0	0
Africa	ZAF_46	2447	773	948	2787	1771	1497	2020	384	1824	1737	2277	1240	2066	1034	1385	1831	1407	1496	2523	966	1487	1506	1550	1543	2424	916	1586	1398	2	0	1	0	0	0	0	0
Africa	ZAF_461	2805	872	1081	3184	1997	1716	2282	435	2048	1974	2568	1386	2349	1157	1590	2056	1668	1741	2803	1137	1727	2019	1865	1810	2851	1000	1714	1633	7	0	0	0	0	0	0	1
Africa	ZAF_463	2843	881	1086	3216	2018	1738	2305	438	2078	1990	2589	1412	2372	1167	1608	2081	1622	1788	2863	1008	1802	1901	2026	1642	2887	1180	1743	1640	7	0	0	0	0	0	0	1
Africa	ZAF_464	2877	883	1091	3218	2020	1736	2306	437	2080	1989	2588	1409	2378	1167	1605	2080	1630	1774	2852	1106	1757	1706	1678	1733	2902	1109	1752	1617	2	0	1	0	0	0	0	0
Africa	ZAF_465	2846	885	1089	3219	2020	1736	2308	438	2077	1989	2589	1410	2375	1166	1609	2081	1572	1727	2862	1039	1837	1812	2065	1636	2799	1250	1772	1590	2	0	1	0	0	0	0	0
Africa	ZAF_467	2842	883	1092	3214	2020	1735	2304	439	2078	1989	2590	1407	2374	1167	1607	2077	1623	1728	2877	985	1883	1832	2068	1669	2844	1184	1762	1615	3	0	0	1	0	0	0	0
Africa	ZAF_47	2842	882	1091	3223	2019	1737	2306	439	2077	1988	2589	1407	2375	1169	1607	2079	1604	1718	2903	1110	1700	1705	1764	1746	2784	1056	1831	1604	7	0	0	0	0	0	0	1
Africa	ZAF_470	2588	811	998	2929	1848	1567	2088	397	1879	1822	2369	1263	2156	1040	1470	1877	1537	1590	2577	1040	1555	1873	1731	1653	2632	924	1567	1500	3	0	0	1	0	0	0	0
Africa	ZAF_476	2847	886	1088	3218	2022	1738	2305	440	2079	1992	2588	1414	2374	1166	1608	2083	1603	1735	2901	1177	1681	2008	1887	1852	2845	1023	1772	1621	2	0	1	0	0	0	0	0
Africa	ZAF_479	2815	879	1080	3196	1995	1730	2283	431	2060	1977	2564	1401	2356	1155	1592	2058	1670	1737	2808	1138	1729	2026	1875	1822	2854	1002	1713	1634	3	0	0	1	0	0	0	0
Africa	ZAF_482	2848	888	1089	3223	2024	1739	2304	438	2080	1991	2589	1408	2377	1167	1608	2081	1656	1802	2852	987	1876	1976	2049	1703	2944	1118	1748	1617	6	0	0	0	0	0	1	0
Africa	ZAF_485	2846	887	1094	3221	2019	1741	2306	437	2078	1992	2588	1410	2377	1168	1606	2082	1618	1809	2798	1024	1709	1758	1626	1771	2860	995	1705	1656	7	0	0	0	0	0	0	1
Africa	ZAF_486	2849	883	1090	3221	2019	1740	2309	436	2082	1991	2591	1412	2379	1167	1608	2080	1616	1809	2800	1022	1711	1755	1626	1768	2861	998	1706	1659	7	0	0	0	0	0	0	1
Africa	ZAF_487	2847	886	1094	3221	2022	1739	2305	438	2079	1993	2590	1411	2376	1166	1608	2082	2022	1740	2307	439	2082	1992	2589	1410	2375	1166	1608	2083	6	0	0	0	0	0	1	0
Africa	ZAF_488	2720	858	1054	3110	1940	1670	2206	428	2005	1919	2504	1353	2277	1138	1545	1998	1550	1658	2793	1076	1652	1642	1704	1683	2681	1019	1751	1544	2	0	1	0	0	0	0	0
Africa	ZAF_490	2657	826	1033	3040	1902	1616	2146	415	1948	1880	2436	1313	2226	1094	1494	1944	1551	1627	2656	965	1630	1627	1657	1637	2616	973	1630	1568	2	0	1	0	0	0	0	0
Africa	ZAF_493	2848	886	1089	3222	2023	1740	2305	438	2080	1991	2590	1409	2377	1168	1608	2082	1655	1803	2852	988	1876	1976	2049	1703	2945	1118	1748	1617	6	0	0	0	0	0	1	0
Africa	ZAF_495	2844	881	1086	3218	2018	1736	2308	439	2077	1989	2590	1410	2373	1168	1608	2080	1603	1717	2904	1110	1699	1704	1762	1747	2785	1056	1832	1604	7	0	0	0	0	0	0	1
Africa	ZAF_499	2842	881	1086	3212	2015	1740	2307	437	2074	1990	2588	1411	2373	1167	1608	2081	1653	1744	2799	1196	1711	2037	1855	1790	2890	1039	1721	1585	7	0	0	0	0	0	0	1
Africa	ZAF_5	2848	885	1091	3214	2019	1735	2308	438	2078	1990	2590	1410	2377	1168	1604	2081	0	2	0	0	6	0	0	0	0	1	2	0	2	0	1	0	0	0	0	0
Africa	ZAF_501	2727	836	1027	3082	1924	1657	2213	414	1990	1891	2463	1357	2274	1107	1536	1984	1534	1628	2782	983	1789	1746	1941	1604	2752	1132	1687	1509	2	0	1	0	0	0	0	0
Africa	ZAF_51	2846	886	1090	3217	2022	1738	2304	441	2079	1990	2587	1413	2373	1168	1608	2083	1691	1727	2762	1096	1793	1627	1713	1695	2769	1085	1826	1582	3	0	0	1	0	0	0	0
Africa	ZAF_55	2848	885	1088	3220	2020	1740	2308	438	2077	1992	2589	1413	2375	1167	1608	2084	1657	1802	2850	987	1873	1977	2049	1699	2944	1117	1748	1617	7	0	0	0	0	0	0	1
Africa	ZAF_56	2815	869	1084	3190	2005	1719	2290	436	2070	1967	2569	1401	2356	1162	1595	2064	1636	1716	2799	1026	1724	1727	1751	1730	2759	1040	1724	1663	2	0	1	0	0	0	0	0
Africa	ZAF_57	2820	875	1078	3191	2005	1719	2284	436	2060	1968	2565	1395	2351	1157	1595	2062	1602	1714	2866	1027	1832	1824	2010	1671	2833	1139	1790	1556	3	0	0	1	0	0	0	0
Africa	ZAF_60	2849	883	1088	3218	2022	1736	2304	436	2082	1988	2589	1410	2375	1168	1606	2082	1654	1724	2864	1222	1650	2064	1825	1829	2914	1043	1670	1659	3	0	0	1	0	0	0	0
Africa	ZAF_63	2846	882	1087	3217	2021	1738	2304	438	2079	1990	2590	1411	2372	1168	1608	2083	1647	1693	2877	1073	1916	1833	2055	1725	2838	1149	1842	1536	2	0	1	0	0	0	0	0
Africa	ZAF_64	2844	882	1090	3219	2018	1736	2306	439	2078	1988	2588	1409	2374	1168	1607	2078	1610	1752	2805	1086	1737	1676	1655	1739	2811	1069	1749	1602	2	0	1	0	0	0	0	0
Africa	ZAF_65	2817	865	1076	3168	1994	1715	2284	435	2059	1959	2560	1394	2346	1159	1592	2054	1586	1697	2871	1030	1834	1816	2013	1656	2838	1171	1753	1559	2	0	1	0	0	0	0	0
Africa	ZAF_66	2819	876	1079	3194	2008	1716	2291	437	2073	1967	2569	1402	2360	1164	1591	2064	1646	1782	2831	982	1862	1958	2030	1692	2922	1110	1732	1604	7	0	0	0	0	0	0	1
Africa	ZAF_7	2868	886	1092	3219	2024	1740	2306	440	2080	1991	2591	1411	2375	1168	1612	2083	1657	1804	2852	989	1875	1977	2052	1703	2947	1118	1750	1617	7	0	0	0	0	0	0	1
Africa	ZAF_70	2837	873	1084	3194	2001	1718	2287	436	2057	1974	2570	1392	2356	1161	1590	2061	1665	1743	2817	1137	1725	2030	1869	1825	2862	1000	1721	1645	2	0	1	0	0	0	0	0
Africa	ZAF_72	2849	885	1093	3220	2023	1740	2307	437	2082	1991	2592	1410	2377	1168	1610	2082	0	3	0	0	8	0	0	2	0	1	2	0	1	1	0	0	0	0	0	0
Africa	ZAF_76	2847	887	1088	3219	2020	1739	2309	439	2077	1991	2589	1411	2377	1168	1608	2082	1670	1790	2856	1186	1673	2132	1858	1809	2987	1049	1656	1672	2	0	1	0	0	0	0	0
Africa	ZAF_77	2848	887	1089	3221	2018	1737	2310	439	2078	1991	2591	1409	2379	1168	1607	2078	1601	1736	2902	1177	1682	2010	1887	1851	2845	1019	1773	1619	6	0	0	0	0	0	1	0
Africa	ZAF_78	2878	885	1089	3222	2023	1739	2305	438	2083	1988	2589	1409	2379	1168	1609	2080	1562	1731	2831	1071	1720	1701	1680	1751	2812	1084	1704	1610	4	0	0	0	1	0	0	0
Africa	ZAF_8	2802	871	1073	3166	2000	1712	2263	434	2059	1965	2552	1391	2345	1155	1577	2051	1619	1737	2753	1130	1693	2062	1880	1813	2808	991	1692	1600	3	0	0	1	0	0	0	0
Africa	ZAF_82	2842	878	1092	3218	2020	1736	2304	436	2079	1987	2589	1409	2372	1167	1608	2080	1643	1693	2877	1075	1914	1834	2054	1723	2836	1147	1840	1535	2	0	1	0	0	0	0	0
Africa	ZAF_83	2846	886	1094	3218	2022	1740	2305	438	2079	1992	2590	1411	2376	1166	1610	2082	1693	1719	2856	1047	1839	1899	2077	1673	2840	1148	1793	1633	7	0	0	0	0	0	0	1
Africa	ZAF_84	2847	883	1088	3217	2022	1739	2304	438	2082	1991	2589	1413	2375	1167	1607	2083	1669	1737	2856	1059	1736	1720	1679	1768	2857	1006	1753	1651	7	0	0	0	0	0	0	1
Africa	ZAF_85	2840	883	1089	3215	2020	1733	2302	438	2073	1985	2580	1408	2373	1161	1605	2078	1561	1727	2819	1072	1719	1697	1676	1746	2802	1079	1701	1602	3	0	0	1	0	0	0	0
Africa	ZAF_89	2848	886	1086	3225	2022	1738	2307	438	2077	1991	2587	1412	2376	1166	1606	2084	1657	1801	2851	985	1875	1977	2046	1701	2944	1116	1748	1617	7	0	0	0	0	0	0	1
Africa	ZAF_9	2568	815	1000	2913	1860	1572	2088	404	1899	1830	2384	1271	2157	1069	1464	1895	1483	1560	2614	909	1724	1672	1903	1528	2571	1085	1597	1460	2	0	1	0	0	0	0	0
Africa	ZAF_91	2876	881	1086	3219	2019	1736	2309	438	2075	1990	2589	1408	2376	1165	1609	2079	1603	1718	2901	1111	1701	1705	1761	1746	2795	1055	1840	1607	7	0	0	0	0	0	0	1
Africa	ZAF_94	2877	886	1087	3226	2024	1741	2305	439	2079	1991	2586	1410	2379	1168	1608	2084	1658	1803	2851	987	1875	1978	2047	1703	2945	1116	1750	1618	7	0	0	0	0	0	0	1
Africa	ZAF_96	2849	885	1089	3216	2022	1738	2303	438	2081	1991	2590	1412	2373	1168	1606	2084	1671	1739	2852	1059	1736	1720	1678	1767	2858	1007	1752	1651	3	0	0	1	0	0	0	0
Africa	ZAF_97	2881	885	1091	3223	2023	1736	2309	437	2080	1992	2593	1411	2377	1166	1609	2083	1622	1728	2860	1095	1677	1785	1718	1804	2790	1014	1747	1675	4	0	0	0	1	0	0	0
Africa	ZAF_98	2820	874	1083	3193	2003	1724	2281	435	2064	1974	2568	1395	2356	1160	1593	2059	1627	1751	2763	1139	1695	2081	1889	1807	2824	1001	1703	1606	3	0	0	1	0	0	0	0
Africa	ZAF_99	2849	885	1088	3220	2023	1739	2306	439	2081	1989	2587	1411	2378	1168	1608	2081	1656	1800	2852	987	1875	1976	2049	1703	2944	1118	1748	1617	7	0	0	0	0	0	0	1
Asia	ARE_21	2840	878	1090	3202	2019	1734	2300	436	2074	1984	2583	1407	2368	1162	1606	2079	1599	1775	2884	1186	1704	2029	1902	1819	2897	1047	1782	1584	3	0	0	1	0	0	0	0
Asia	ARE_26	2819	872	1075	3186	1997	1718	2279	435	2055	1959	2552	1392	2348	1154	1592	2052	1596	1739	2713	1074	1665	1654	1597	1669	2749	1091	1674	1630	7	0	0	0	0	0	0	1
Asia	ARE_38	2819	875	1076	3181	2002	1720	2272	435	2055	1961	2552	1392	2343	1153	1593	2056	1597	1739	2711	1074	1664	1652	1598	1673	2749	1092	1673	1630	7	0	0	0	0	0	0	1
Asia	ARE_55	2882	887	1092	3221	2024	1741	2308	440	2078	1991	2588	1410	2379	1167	1611	2083	0	1	0	0	5	0	1	0	0	1	3	0	1	1	0	0	0	0	0	0
Asia	ARE_57	2809	873	1082	3169	1996	1715	2267	434	2047	1958	2545	1387	2339	1152	1584	2053	1633	1736	2770	1085	1676	1680	1650	1698	2769	1035	1759	1608	2	0	1	0	0	0	0	0
Asia	ARE_58	2882	887	1091	3222	2023	1740	2309	439	2079	1990	2589	1411	2378	1168	1610	2084	0	1	0	0	5	2	0	1	0	1	2	0	1	1	0	0	0	0	0	0
Asia	ARE_59	2819	874	1075	3186	1997	1719	2277	433	2057	1960	2552	1394	2347	1151	1593	2051	1595	1737	2716	1074	1666	1654	1597	1672	2749	1090	1674	1629	7	0	0	0	0	0	0	1
Asia	ARE_61	2882	886	1092	3221	2024	1741	2307	439	2079	1992	2590	1410	2378	1167	1611	2083	0	1	0	0	6	0	1	0	0	1	2	0	1	1	0	0	0	0	0	0
Asia	ARE_64	2806	868	1069	3174	1992	1701	2261	429	2047	1948	2541	1383	2330	1143	1580	2042	1588	1724	2699	1069	1654	1641	1586	1665	2733	1085	1663	1624	7	0	0	0	0	0	0	1
Asia	ARE_66	2807	867	1069	3172	1989	1701	2261	430	2046	1949	2543	1385	2326	1146	1579	2044	1588	1721	2701	1071	1654	1641	1588	1667	2733	1084	1662	1622	7	0	0	0	0	0	0	1
Asia	ARE_69	2807	864	1071	3168	1990	1703	2262	427	2048	1949	2543	1384	2330	1145	1579	2044	1588	1722	2698	1070	1654	1641	1589	1664	2733	1084	1662	1624	7	0	0	0	0	0	0	1
Asia	BGD_1	2832	874	1082	3182	2004	1722	2282	429	2063	1960	2565	1384	2355	1162	1594	2059	1593	1738	2843	1168	1699	1995	1855	1840	2854	1039	1723	1614	2	0	1	0	0	0	0	0
Asia	BGD_10	2881	885	1091	3223	2022	1741	2309	437	2082	1991	2590	1412	2380	1166	1611	2081	0	1	1	0	8	2	0	0	0	1	2	0	1	1	0	0	0	0	0	0
Asia	BGD_11	2851	885	1094	3231	2022	1745	2312	439	2079	1995	2591	1413	2381	1167	1613	2084	1640	1686	2896	1035	1868	1847	2091	1712	2785	1138	1821	1592	4	0	0	0	1	0	0	0
Asia	BGD_13	2880	885	1089	3219	2026	1738	2307	439	2085	1990	2590	1417	2375	1166	1611	2085	2	1	6	0	7	2	0	5	3	3	3	1	1	1	0	0	0	0	0	0
Asia	BGD_14	2872	887	1094	3221	2019	1741	2311	437	2079	1992	2590	1410	2382	1168	1609	2081	1672	1794	2855	1189	1675	2137	1859	1810	2989	1046	1659	1672	3	0	0	1	0	0	0	0
Asia	BGD_17	2872	887	1094	3220	2024	1739	2306	439	2081	1991	2591	1412	2375	1168	1611	2084	1630	1797	2717	1083	1737	2115	1912	1881	2772	1021	1655	1713	6	0	0	0	0	0	1	0
Asia	BGD_19	2882	886	1091	3220	2024	1738	2309	439	2081	1991	2591	1411	2379	1168	1609	2083	0	1	2	1	4	2	0	1	0	1	3	0	1	1	0	0	0	0	0	0
Asia	BGD_4	2853	885	1095	3220	2023	1745	2313	439	2082	1992	2589	1421	2377	1165	1615	2088	1617	1833	2900	1157	1767	2022	1865	1834	2977	1075	1753	1600	4	0	0	0	1	0	0	0
Asia	BGD_8	2861	884	1094	3227	2021	1743	2312	439	2077	1997	2594	1410	2382	1166	1614	2081	1621	1733	2902	1039	1869	1791	2046	1718	2779	1181	1838	1623	4	0	0	0	1	0	0	0
Asia	BGD_9	2846	887	1089	3216	2022	1737	2304	439	2077	1991	2589	1408	2375	1166	1608	2081	1613	1810	2910	1158	1619	2060	1824	1789	2970	1028	1706	1656	2	0	1	0	0	0	0	0
Asia	CHN_10	2880	888	1093	3217	2023	1742	2309	439	2080	1988	2587	1413	2377	1168	1612	2085	1334	1117	1579	291	1368	1268	1701	965	1549	792	1051	1432	7	0	0	0	0	0	0	1
Asia	CHN_101	2839	878	1090	3203	2014	1735	2302	435	2068	1985	2584	1404	2367	1162	1606	2077	1609	1756	2728	1084	1675	1673	1618	1686	2770	1093	1690	1641	7	0	0	0	0	0	0	1
Asia	CHN_104	2846	886	1090	3213	2022	1737	2303	438	2078	1990	2588	1410	2373	1167	1607	2082	1624	1730	2851	1093	1676	1782	1715	1803	2787	1013	1745	1671	3	0	0	1	0	0	0	0
Asia	CHN_108	2846	886	1092	3209	2022	1739	2303	439	2079	1989	2586	1412	2373	1167	1608	2082	1618	1808	2794	1022	1706	1753	1625	1771	2858	998	1704	1657	3	0	0	1	0	0	0	0
Asia	CHN_110	2843	883	1088	3210	2019	1736	2303	438	2077	1988	2588	1409	2370	1167	1607	2080	1610	1752	2799	1085	1737	1674	1655	1739	2808	1070	1749	1603	7	0	0	0	0	0	0	1
Asia	CHN_115	2847	911	1094	3210	2026	1743	2305	444	2083	1990	2589	1416	2372	1170	1616	2086	1672	1739	2849	1073	1803	1888	2013	1710	2823	1139	1791	1613	5	0	0	0	0	1	0	0
Asia	CHN_116	2848	886	1093	3209	2023	1741	2305	440	2080	1989	2588	1412	2374	1168	1612	2084	1588	1775	2936	1080	1811	1863	1995	1723	2898	1174	1810	1593	6	0	0	0	0	0	1	0
Asia	CHN_117	2841	878	1088	3212	2016	1735	2301	439	2072	1986	2585	1405	2370	1167	1606	2076	1612	1761	2731	1084	1680	1675	1619	1686	2771	1095	1691	1641	2	0	1	0	0	0	0	0
Asia	CHN_124	2317	731	885	2670	1684	1397	1878	366	1723	1619	2120	1171	1940	969	1295	1736	1337	1447	2409	858	1411	1469	1419	1466	2396	911	1392	1387	2	0	1	0	0	0	0	0
Asia	CHN_125	2865	884	1090	3212	2020	1741	2307	439	2080	1988	2589	1413	2374	1169	1612	2083	1627	1787	2845	1074	1723	1651	1648	1712	2865	1108	1753	1655	7	0	0	0	0	0	0	1
Asia	CHN_127	2846	882	1092	3218	2021	1740	2307	437	2079	1990	2591	1410	2375	1168	1610	2082	1617	1785	2790	1085	1780	1709	1665	1794	2814	1051	1773	1605	2	0	1	0	0	0	0	0
Asia	CHN_13	2848	885	1090	3216	2021	1740	2306	439	2078	1990	2589	1410	2374	1168	1610	2083	1598	1817	2887	1131	1788	1916	1924	1729	2936	1155	1801	1567	6	0	0	0	0	0	1	0
Asia	CHN_135	2849	890	1092	3220	2025	1745	2310	441	2082	1993	2591	1415	2379	1169	1615	2086	1664	1740	2898	1015	1841	1894	2045	1738	2839	1148	1752	1687	4	0	0	0	1	0	0	0
Asia	CHN_14	2880	886	1093	3219	2022	1742	2308	439	2080	1990	2588	1414	2376	1167	1612	2084	1704	1518	2269	606	1733	1834	2064	1392	2377	967	1388	1727	6	0	0	0	0	0	1	0
Asia	CHN_15	2881	888	1095	3214	2022	1741	2311	437	2081	1988	2589	1414	2377	1167	1612	2085	0	0	0	0	1	2	2	1	0	0	1	1	1	1	0	0	0	0	0	0
Asia	CHN_150	2870	888	1093	3217	2023	1744	2308	439	2081	1990	2589	1411	2379	1168	1614	2083	1644	1764	2901	1191	1666	2090	1882	1832	2941	1063	1682	1683	3	0	0	1	0	0	0	0
Asia	CHN_154	2841	880	1088	3211	2016	1736	2302	438	2072	1987	2585	1404	2371	1167	1605	2076	1611	1761	2731	1084	1680	1673	1618	1686	2772	1097	1691	1641	3	0	0	1	0	0	0	0
Asia	CHN_157	2845	886	1093	3214	2023	1740	2307	438	2082	1990	2588	1415	2376	1166	1610	2084	1680	1680	2941	1060	1834	1885	2094	1668	2897	1188	1760	1643	3	0	0	1	0	0	0	0
Asia	CHN_168	2870	889	1091	3207	2021	1743	2311	438	2082	1987	2585	1417	2378	1166	1612	2085	2021	1742	2309	437	2081	1988	2587	1416	2380	1167	1613	2084	3	0	0	1	0	0	0	0
Asia	CHN_17	2842	884	1090	3215	2018	1741	2306	439	2079	1988	2587	1413	2373	1168	1611	2081	1606	1718	2901	1111	1699	1707	1766	1751	2784	1055	1832	1606	7	0	0	0	0	0	0	1
Asia	CHN_182	2848	887	1093	3213	2023	1742	2307	439	2081	1991	2589	1415	2376	1167	1612	2084	1630	1798	2716	1083	1737	2115	1911	1884	2774	1019	1658	1712	6	0	0	0	0	0	1	0
Asia	CHN_183	2838	880	1092	3203	2016	1737	2301	438	2076	1988	2585	1409	2370	1167	1606	2078	1597	1710	2903	1043	1856	1833	2043	1679	2866	1184	1773	1568	3	0	0	1	0	0	0	0
Asia	CHN_184	2846	888	1092	3212	2021	1741	2306	439	2081	1989	2589	1413	2374	1168	1611	2083	1641	1723	2882	1238	1676	2063	1839	1828	2955	1023	1712	1577	2	0	1	0	0	0	0	0
Asia	CHN_189	2843	884	1090	3210	2019	1738	2304	439	2080	1989	2588	1412	2372	1168	1608	2080	1611	1754	2803	1086	1737	1673	1655	1741	2812	1072	1749	1602	7	0	0	0	0	0	0	1
Asia	CHN_19	2839	881	1091	3213	2018	1737	2301	438	2076	1988	2586	1409	2370	1166	1607	2078	1682	1750	2834	1145	1737	2041	1888	1834	2880	1011	1729	1652	3	0	0	1	0	0	0	0
Asia	CHN_20	2846	895	1095	3211	2026	1745	2307	444	2084	1992	2590	1418	2375	1171	1616	2087	1601	1795	2913	1052	1825	1908	2041	1713	2892	1189	1780	1607	6	0	0	0	0	0	1	0
Asia	CHN_22	2846	886	1091	3216	2020	1738	2309	439	2079	1988	2588	1413	2374	1168	1609	2083	1603	1736	2900	1177	1679	2008	1885	1851	2847	1021	1771	1621	6	0	0	0	0	0	1	0
Asia	CHN_23	2844	885	1091	3211	2020	1740	2305	439	2080	1989	2588	1412	2373	1169	1609	2083	1587	1775	2937	1080	1811	1864	1991	1722	2896	1173	1807	1593	6	0	0	0	0	0	1	0
Asia	CHN_24	2846	921	1090	3213	2024	1743	2305	443	2082	1989	2589	1416	2370	1169	1617	2085	1720	1745	2800	1056	1741	1636	1696	1679	2807	1072	1787	1635	2	0	1	0	0	0	0	0
Asia	CHN_25	2845	908	1092	3213	2024	1744	2306	444	2082	1992	2591	1416	2372	1171	1616	2086	1658	1739	2833	1116	1685	1699	1717	1707	2794	1125	1740	1661	7	0	0	0	0	0	0	1
Asia	CHN_26	2880	885	1090	3214	2021	1740	2306	439	2079	1986	2584	1411	2376	1166	1611	2080	1585	1691	2837	1047	1722	1696	1767	1658	2839	1060	1759	1542	7	0	0	0	0	0	0	1
Asia	CHN_27	2842	884	1092	3215	2020	1740	2304	437	2079	1990	2591	1410	2372	1167	1611	2081	1606	1719	2900	1111	1699	1706	1766	1749	2784	1055	1831	1606	7	0	0	0	0	0	0	1
Asia	CHN_29	2881	886	1092	3217	2023	1742	2308	439	2081	1990	2589	1412	2378	1169	1611	2084	0	1	1	1	3	0	1	1	0	1	3	0	1	1	0	0	0	0	0	0
Asia	CHN_3	2876	884	1089	3205	2019	1739	2303	439	2076	1984	2581	1410	2371	1166	1609	2081	1623	1832	2768	1183	1714	2042	1786	1862	2886	1034	1732	1622	2	0	1	0	0	0	0	0
Asia	CHN_35	2866	887	1093	3215	2023	1741	2307	439	2081	1990	2588	1415	2375	1167	1612	2085	1624	1730	2854	1096	1675	1786	1718	1808	2790	1013	1746	1674	3	0	0	1	0	0	0	0
Asia	CHN_38	2859	885	1091	3211	2022	1740	2306	439	2080	1988	2589	1412	2373	1168	1612	2083	1610	1778	2893	1199	1676	2030	1841	1866	2900	1049	1739	1654	2	0	1	0	0	0	0	0
Asia	CHN_5	2847	892	1093	3215	2027	1744	2309	445	2082	1992	2589	1417	2376	1170	1616	2088	1648	1777	2832	1053	1729	1674	1718	1695	2818	1103	1763	1649	3	0	0	1	0	0	0	0
Asia	CHN_51	2881	888	1093	3215	2023	1741	2310	437	2081	1990	2590	1413	2378	1166	1612	2084	0	0	0	0	3	0	0	1	0	0	2	0	1	1	0	0	0	0	0	0
Asia	CHN_52	2861	880	1090	3206	2020	1736	2301	439	2077	1984	2586	1409	2367	1166	1612	2079	1600	1773	2862	1067	1712	1638	1700	1675	2846	1112	1789	1617	3	0	0	1	0	0	0	0
Asia	CHN_57	2842	880	1088	3213	2017	1738	2307	434	2078	1985	2588	1412	2370	1163	1612	2080	1632	1764	2843	1189	1706	2044	1845	1811	2924	1043	1715	1602	7	0	0	0	0	0	0	1
Asia	CHN_6	2846	881	1089	3211	2021	1736	2302	439	2077	1988	2587	1408	2371	1167	1607	2081	1615	1786	2786	1085	1778	1702	1654	1794	2812	1051	1774	1603	2	0	1	0	0	0	0	0
Asia	CHN_64	2880	887	1090	3214	2022	1740	2305	439	2079	1985	2584	1410	2375	1167	1611	2081	1591	1721	2771	1058	1702	1640	1633	1705	2786	1042	1740	1584	7	0	0	0	0	0	0	1
Asia	CHN_7	2842	880	1089	3211	2018	1735	2300	437	2071	1989	2587	1405	2368	1165	1605	2079	1613	1761	2730	1084	1681	1673	1620	1686	2771	1097	1692	1641	7	0	0	0	0	0	0	1
Asia	CHN_70	2846	888	1092	3213	2022	1741	2306	439	2081	1989	2589	1413	2374	1169	1611	2083	1622	1744	2860	1065	1842	1904	2102	1712	2794	1182	1823	1608	2	0	1	0	0	0	0	0
Asia	CHN_71	2866	884	1091	3209	2020	1741	2309	438	2077	1990	2590	1414	2373	1166	1613	2085	1626	1787	2845	1074	1723	1651	1649	1711	2867	1108	1753	1655	7	0	0	0	0	0	0	1
Asia	CHN_74	2862	887	1090	3216	2022	1740	2308	437	2081	1990	2591	1412	2377	1167	1611	2083	1695	1719	2855	1046	1840	1898	2076	1672	2843	1149	1799	1634	3	0	0	1	0	0	0	0
Asia	CHN_79	2853	879	1084	3185	2005	1731	2279	434	2066	1968	2566	1401	2347	1163	1598	2067	1609	1772	2764	1077	1764	1688	1653	1778	2799	1048	1762	1593	3	0	0	1	0	0	0	0
Asia	CHN_8	2866	887	1092	3212	2022	1741	2307	439	2081	1988	2588	1413	2375	1168	1612	2084	1672	1740	2852	1060	1735	1720	1680	1770	2863	1006	1757	1654	2	0	1	0	0	0	0	0
Asia	CHN_90	2868	887	1095	3215	2025	1742	2308	440	2082	1988	2588	1414	2376	1169	1613	2087	1644	1765	2901	1190	1666	2089	1882	1835	2940	1064	1682	1683	3	0	0	1	0	0	0	0
Asia	CHN_96	2867	888	1093	3213	2021	1741	2308	437	2082	1988	2588	1415	2376	1166	1612	2083	1693	1730	2760	1095	1793	1627	1713	1695	2774	1084	1831	1586	7	0	0	0	0	0	0	1
Asia	CHN_98	2879	886	1090	3210	2021	1739	2305	439	2079	1985	2584	1410	2375	1167	1610	2080	1565	1756	2807	995	1692	1745	1754	1724	2780	1033	1734	1642	7	0	0	0	0	0	0	1
Asia	CHN_99	2847	894	1094	3212	2026	1744	2307	444	2085	1992	2591	1419	2374	1170	1617	2086	1600	1794	2915	1053	1824	1908	2040	1713	2892	1189	1780	1607	6	0	0	0	0	0	1	0
Asia	IDN_13	2840	880	1088	3205	2017	1738	2301	436	2075	1986	2586	1407	2369	1167	1607	2079	1613	1760	2730	1083	1679	1672	1621	1686	2771	1098	1691	1642	7	0	0	0	0	0	0	1
Asia	IDN_25	2880	887	1094	3221	2021	1741	2309	438	2078	1991	2590	1410	2378	1168	1610	2083	1618	1811	2797	1023	1708	1756	1627	1769	2860	998	1707	1660	6	0	0	0	0	0	1	0
Asia	IDN_26	2877	885	1092	3218	2022	1742	2306	436	2081	1990	2589	1409	2380	1168	1610	2082	1621	1730	2855	1096	1678	1783	1717	1805	2790	1014	1746	1674	6	0	0	0	0	0	1	0
Asia	IDN_35	2878	886	1091	3214	2023	1740	2309	438	2082	1988	2589	1415	2376	1167	1612	2085	1563	1733	2827	1071	1718	1702	1680	1754	2813	1083	1704	1612	6	0	0	0	0	0	1	0
Asia	IDN_47	2881	886	1091	3210	2022	1738	2304	441	2078	1989	2587	1411	2373	1166	1610	2081	1587	1774	2936	1080	1808	1863	1991	1722	2901	1174	1812	1597	7	0	0	0	0	0	0	1
Asia	IDN_48	2232	698	861	2537	1638	1355	1852	330	1624	1589	2054	1110	1911	907	1216	1690	1316	1319	2318	839	1436	1539	1633	1402	2282	927	1385	1318	2	0	1	0	0	0	0	0
Asia	IDN_5	2863	879	1091	3210	2017	1731	2302	437	2075	1982	2584	1405	2372	1164	1603	2076	1618	1726	2872	981	1884	1821	2063	1663	2852	1187	1763	1619	2	0	1	0	0	0	0	0
Asia	IDN_50	2845	885	1091	3212	2021	1740	2306	439	2080	1988	2588	1413	2373	1167	1612	2081	1564	1761	2947	1025	1853	1833	2038	1730	2863	1194	1796	1613	2	0	1	0	0	0	0	0
Asia	IDN_51	2044	626	761	2171	1405	1228	1611	295	1392	1337	1792	964	1605	831	1129	1486	1180	1233	1978	726	1196	1176	1166	1217	2013	729	1260	1175	7	0	0	0	0	0	0	1
Asia	IDN_52	2818	851	1075	3180	1987	1696	2279	428	2037	1969	2553	1378	2353	1137	1570	2041	1567	1682	2875	1027	1844	1813	2031	1656	2853	1159	1754	1546	2	0	1	0	0	0	0	0
Asia	IDN_53	2839	879	1091	3207	2015	1737	2301	437	2074	1987	2587	1407	2368	1168	1606	2078	1611	1762	2732	1084	1680	1672	1621	1687	2771	1098	1690	1641	7	0	0	0	0	0	0	1
Asia	IDN_57	2859	886	1089	3185	2015	1731	2291	438	2066	1980	2580	1404	2353	1163	1606	2078	1686	1722	2741	1095	1784	1618	1704	1690	2756	1080	1822	1575	2	0	1	0	0	0	0	0
Asia	IDN_6	2839	881	1090	3203	2018	1737	2300	438	2075	1988	2585	1408	2370	1165	1607	2077	1611	1761	2732	1084	1679	1670	1621	1687	2771	1100	1691	1641	7	0	0	0	0	0	0	1
Asia	IDN_9	2874	883	1092	3220	2019	1737	2308	438	2075	1990	2590	1408	2376	1168	1607	2081	1666	1792	2857	1187	1671	2133	1856	1808	2984	1046	1658	1670	6	0	0	0	0	0	1	0
Asia	IND_1	2836	882	1091	3212	2012	1736	2305	438	2075	1987	2587	1410	2371	1168	1606	2077	1603	1775	2863	1066	1715	1642	1700	1672	2836	1111	1785	1611	3	0	0	1	0	0	0	0
Asia	IND_1003	2737	848	1062	3057	1947	1675	2214	432	1996	1924	2503	1362	2276	1137	1549	2012	1591	1648	2757	1048	1838	1791	1973	1656	2736	1114	1778	1476	3	0	0	1	0	0	0	0
Asia	IND_1007	2307	709	914	2660	1690	1423	1938	369	1733	1698	2199	1162	2014	960	1334	1708	1363	1451	2348	988	1437	1715	1558	1526	2382	829	1447	1336	2	0	1	0	0	0	0	0
Asia	IND_101	2835	881	1087	3206	2012	1739	2303	436	2067	1984	2580	1401	2371	1164	1607	2074	1641	1735	2839	1033	1875	1831	2065	1648	2829	1209	1787	1605	2	0	1	0	0	0	0	0
Asia	IND_1010	2537	816	999	2842	1823	1562	2056	400	1846	1793	2330	1260	2111	1060	1448	1891	1539	1561	2550	963	1665	1695	1853	1516	2536	1047	1632	1484	3	0	0	1	0	0	0	0
Asia	IND_1021	2478	794	972	2756	1779	1521	1999	383	1808	1736	2274	1222	2048	1031	1416	1836	1412	1522	2535	990	1476	1500	1559	1538	2432	944	1612	1427	2	0	1	0	0	0	0	0
Asia	IND_1024	2497	805	989	2807	1810	1531	2032	383	1829	1763	2310	1243	2082	1045	1421	1873	1518	1545	2523	949	1648	1680	1825	1502	2512	1033	1607	1466	2	0	1	0	0	0	0	0
Asia	IND_103	2845	882	1091	3218	2018	1737	2308	438	2075	1993	2589	1408	2379	1165	1607	2077	1651	1729	2864	1223	1648	2068	1826	1826	2914	1040	1670	1658	6	0	0	0	0	0	1	0
Asia	IND_1036	2843	882	1091	3214	2016	1738	2305	439	2080	1989	2587	1413	2374	1167	1608	2078	1638	1763	2788	1149	1706	2097	1901	1829	2851	1003	1712	1620	2	0	1	0	0	0	0	0
Asia	IND_1039	2838	881	1089	3202	2012	1732	2303	435	2076	1981	2583	1409	2371	1164	1602	2073	1688	1638	2875	1092	1667	1674	1745	1636	2822	1046	1751	1620	2	0	1	0	0	0	0	0
Asia	IND_107	2855	878	1084	3202	2008	1729	2293	438	2058	1981	2576	1397	2359	1162	1599	2071	1601	1744	2790	1081	1725	1667	1650	1731	2802	1063	1745	1601	7	0	0	0	0	0	0	1
Asia	IND_108	2880	883	1089	3218	2021	1739	2306	439	2077	1990	2589	1409	2376	1166	1611	2080	1626	1785	2846	1074	1725	1650	1647	1708	2866	1108	1754	1656	7	0	0	0	0	0	0	1
Asia	IND_112	2846	881	1088	3213	2023	1735	2301	438	2075	1988	2587	1407	2369	1164	1608	2081	1645	1690	2875	1073	1915	1833	2054	1721	2840	1147	1840	1534	6	0	0	0	0	0	1	0
Asia	IND_115	2845	882	1090	3210	2021	1736	2304	437	2079	1986	2584	1415	2370	1164	1608	2083	1651	1727	2862	1219	1647	2062	1825	1829	2910	1044	1670	1660	6	0	0	0	0	0	1	0
Asia	IND_116	2843	883	1090	3218	2017	1736	2305	437	2076	1987	2585	1408	2375	1166	1605	2077	1584	1813	2877	1147	1754	2007	1852	1830	2941	1101	1708	1624	7	0	0	0	0	0	0	1
Asia	IND_117	2762	855	1047	3149	1967	1676	2250	425	2018	1936	2519	1371	2316	1118	1558	2016	1626	1699	2774	1105	1694	1998	1837	1793	2832	983	1681	1599	2	0	1	0	0	0	0	0
Asia	IND_119	2842	880	1087	3209	2018	1736	2303	439	2077	1989	2588	1408	2373	1166	1608	2076	1623	1761	2852	1081	1690	1692	1693	1737	2793	1055	1789	1653	7	0	0	0	0	0	0	1
Asia	IND_121	2846	886	1090	3219	2022	1740	2306	438	2076	1990	2590	1409	2374	1166	1611	2083	1611	1811	2911	1159	1619	2062	1826	1790	2971	1026	1708	1655	2	0	1	0	0	0	0	0
Asia	IND_123	2843	883	1085	3211	2018	1736	2298	439	2070	1987	2584	1407	2365	1162	1609	2078	1625	1782	2840	1073	1722	1644	1642	1708	2848	1104	1747	1650	7	0	0	0	0	0	0	1
Asia	IND_124	2751	848	1041	3135	1946	1673	2246	423	2006	1945	2518	1359	2317	1122	1543	2005	1538	1647	2836	1011	1817	1787	1996	1632	2804	1153	1726	1511	3	0	0	1	0	0	0	0
Asia	IND_129	2557	818	1007	2861	1839	1569	2068	402	1855	1805	2348	1264	2128	1064	1457	1904	1529	1525	2639	983	1655	1709	1896	1503	2613	1097	1590	1500	2	0	1	0	0	0	0	0
Asia	IND_135	2844	881	1086	3219	2021	1738	2306	438	2080	1989	2590	1410	2375	1167	1609	2080	1605	1718	2902	1110	1700	1707	1763	1749	2785	1055	1833	1605	7	0	0	0	0	0	0	1
Asia	IND_136	2676	834	1051	3015	1915	1645	2178	420	1967	1896	2471	1332	2244	1105	1533	1967	1569	1616	2734	1037	1816	1734	1958	1634	2689	1089	1737	1454	2	0	1	0	0	0	0	0
Asia	IND_139	2876	884	1088	3216	2022	1739	2305	437	2077	1989	2590	1409	2372	1166	1611	2082	1607	1718	2899	1110	1701	1705	1765	1750	2796	1056	1840	1608	7	0	0	0	0	0	0	1
Asia	IND_14	2845	884	1086	3219	2019	1739	2307	437	2078	1991	2589	1410	2377	1165	1608	2079	1604	1717	2904	1110	1699	1705	1762	1748	2785	1056	1833	1606	7	0	0	0	0	0	0	1
Asia	IND_140	2876	880	1088	3221	2014	1739	2312	437	2074	1990	2591	1409	2376	1167	1609	2080	1641	1769	2831	1176	1700	2041	1823	1814	2931	1049	1686	1645	7	0	0	0	0	0	0	1
Asia	IND_143	2876	882	1088	3224	2017	1740	2309	436	2075	1988	2589	1406	2377	1167	1609	2080	1603	1719	2903	1111	1700	1708	1762	1747	2798	1054	1840	1608	7	0	0	0	0	0	0	1
Asia	IND_145	2835	881	1089	3213	2012	1738	2304	434	2068	1984	2582	1400	2375	1163	1606	2073	1636	1735	2845	1033	1877	1831	2066	1649	2829	1210	1787	1604	2	0	1	0	0	0	0	0
Asia	IND_15	2847	886	1090	3222	2020	1740	2309	439	2078	1990	2589	1409	2380	1167	1610	2079	1626	1756	2871	1185	1717	2033	1877	1847	2888	1042	1744	1621	2	0	1	0	0	0	0	0
Asia	IND_150	2842	883	1091	3222	2017	1739	2308	436	2078	1991	2590	1407	2380	1166	1607	2076	1603	1718	2903	1111	1701	1707	1764	1747	2783	1054	1832	1604	7	0	0	0	0	0	0	1
Asia	IND_153	2846	884	1089	3221	2018	1738	2314	438	2078	1991	2590	1413	2380	1164	1611	2079	1600	1737	2903	1175	1682	2013	1887	1851	2846	1019	1771	1624	6	0	0	0	0	0	1	0
Asia	IND_154	2845	887	1089	3219	2020	1739	2306	440	2078	1991	2588	1413	2374	1165	1611	2080	1606	1804	2926	1163	1615	2058	1829	1798	2962	1027	1713	1657	6	0	0	0	0	0	1	0
Asia	IND_162	2845	883	1090	3211	2019	1734	2304	436	2079	1986	2587	1414	2366	1165	1606	2083	1643	1692	2875	1071	1913	1831	2052	1726	2836	1150	1841	1535	3	0	0	1	0	0	0	0
Asia	IND_167	2875	880	1088	3212	2019	1736	2303	439	2075	1989	2587	1409	2371	1165	1608	2079	1640	1769	2825	1176	1701	2034	1818	1817	2927	1051	1686	1644	7	0	0	0	0	0	0	1
Asia	IND_169	2873	884	1092	3214	2017	1739	2309	437	2078	1988	2591	1410	2374	1169	1610	2081	1606	1720	2900	1111	1700	1705	1765	1749	2795	1055	1840	1608	7	0	0	0	0	0	0	1
Asia	IND_17	2845	882	1092	3222	2019	1736	2309	438	2075	1988	2585	1408	2379	1168	1604	2081	1571	1729	2861	1038	1836	1812	2062	1634	2800	1250	1771	1589	3	0	0	1	0	0	0	0
Asia	IND_170	2844	884	1091	3215	2019	1736	2304	437	2074	1989	2587	1409	2371	1165	1606	2081	1645	1694	2876	1073	1914	1834	2053	1722	2839	1148	1840	1535	6	0	0	0	0	0	1	0
Asia	IND_173	2876	884	1088	3212	2020	1736	2303	440	2076	1989	2588	1408	2372	1167	1608	2079	1585	1816	2876	1146	1752	2007	1852	1833	2953	1100	1714	1628	3	0	0	1	0	0	0	0
Asia	IND_174	2865	882	1089	3219	2020	1737	2304	438	2081	1988	2591	1409	2374	1168	1610	2078	1607	1718	2901	1111	1699	1706	1763	1747	2795	1055	1836	1609	7	0	0	0	0	0	0	1
Asia	IND_175	2838	882	1091	3212	2017	1736	2303	439	2074	1990	2588	1407	2372	1166	1607	2077	1621	1763	2853	1080	1692	1690	1695	1738	2790	1057	1788	1653	7	0	0	0	0	0	0	1
Asia	IND_184	2844	884	1087	3220	2017	1738	2310	438	2076	1988	2590	1408	2376	1167	1610	2079	1613	1733	2890	1040	1848	1845	2027	1681	2862	1153	1805	1567	6	0	0	0	0	0	1	0
Asia	IND_189	2443	791	970	2752	1765	1507	1995	381	1805	1742	2284	1219	2043	1034	1397	1831	1435	1526	2500	929	1612	1616	1784	1464	2473	1001	1591	1358	2	0	1	0	0	0	0	0
Asia	IND_190	2780	860	1052	3162	1973	1688	2259	427	2028	1955	2532	1375	2332	1130	1558	2028	1612	1689	2777	999	1706	1693	1724	1704	2743	1030	1707	1644	3	0	0	1	0	0	0	0
Asia	IND_191	2817	872	1079	3191	1999	1720	2284	433	2062	1964	2559	1400	2351	1154	1594	2058	1640	1724	2770	1183	1699	2024	1840	1782	2853	1019	1705	1569	2	0	1	0	0	0	0	0
Asia	IND_192	2881	885	1087	3217	2021	1739	2305	439	2076	1992	2590	1409	2375	1166	1609	2082	1585	1773	2939	1079	1813	1863	1990	1721	2903	1173	1812	1597	6	0	0	0	0	0	1	0
Asia	IND_193	2765	861	1062	3096	1959	1685	2232	422	2015	1929	2513	1358	2302	1134	1557	2014	1572	1702	2650	1059	1633	1620	1570	1641	2693	1070	1644	1602	2	0	1	0	0	0	0	0
Asia	IND_194	2840	882	1091	3210	2016	1735	2305	437	2076	1988	2588	1408	2373	1167	1605	2078	1622	1762	2852	1080	1692	1690	1693	1739	2790	1056	1789	1653	7	0	0	0	0	0	0	1
Asia	IND_195	2494	801	977	2793	1796	1522	2029	393	1825	1763	2309	1243	2077	1046	1425	1858	1441	1588	2522	961	1533	1456	1512	1488	2492	1002	1584	1453	2	0	1	0	0	0	0	0
Asia	IND_199	2838	881	1090	3208	2014	1736	2303	437	2076	1989	2588	1408	2372	1166	1606	2075	1688	1642	2877	1094	1670	1678	1752	1636	2826	1049	1756	1620	3	0	0	1	0	0	0	0
Asia	IND_2	2844	880	1087	3213	2017	1734	2304	435	2074	1983	2584	1406	2372	1162	1608	2076	1612	1774	2834	1077	1733	1655	1635	1713	2860	1089	1748	1618	7	0	0	0	0	0	0	1
Asia	IND_20	2712	827	1012	2988	1898	1618	2145	411	1949	1841	2407	1306	2216	1094	1505	1940	1510	1606	2709	1033	1583	1602	1646	1643	2601	977	1719	1510	2	0	1	0	0	0	0	0
Asia	IND_204	2846	882	1087	3224	2021	1739	2308	437	2075	1991	2590	1407	2377	1165	1610	2081	1650	1726	2868	1224	1650	2065	1824	1827	2917	1042	1670	1659	6	0	0	0	0	0	1	0
Asia	IND_205	2878	886	1090	3216	2020	1740	2308	439	2079	1990	2587	1413	2377	1166	1610	2080	1670	1790	2855	1188	1672	2132	1858	1807	2990	1049	1659	1672	2	0	1	0	0	0	0	0
Asia	IND_206	2848	886	1091	3218	2023	1739	2305	440	2078	1993	2589	1412	2376	1165	1609	2082	1565	1733	2826	1071	1720	1702	1681	1751	2811	1082	1701	1611	3	0	0	1	0	0	0	0
Asia	IND_208	2835	880	1085	3209	2020	1730	2298	436	2072	1979	2581	1403	2363	1165	1603	2078	1605	1769	2882	1193	1675	2023	1833	1858	2883	1047	1734	1646	3	0	0	1	0	0	0	0
Asia	IND_209	2876	882	1090	3218	2016	1738	2311	438	2077	1991	2589	1410	2380	1167	1607	2078	1621	1835	2775	1185	1722	2048	1786	1860	2890	1034	1730	1623	2	0	1	0	0	0	0	0
Asia	IND_210	2836	876	1088	3213	2015	1727	2297	435	2068	1985	2582	1406	2363	1159	1599	2077	1621	1778	2834	1065	1722	1643	1644	1701	2845	1102	1737	1647	7	0	0	0	0	0	0	1
Asia	IND_214	2848	885	1090	3221	2020	1739	2308	438	2080	1988	2588	1411	2377	1166	1611	2080	1670	1740	2853	1059	1737	1721	1679	1764	2860	1007	1753	1651	2	0	1	0	0	0	0	0
Asia	IND_218	2879	887	1094	3220	2022	1742	2306	438	2078	1992	2589	1411	2377	1167	1609	2084	1629	1797	2716	1083	1737	2115	1911	1880	2774	1019	1656	1713	6	0	0	0	0	0	1	0
Asia	IND_219	2849	887	1091	3218	2023	1741	2307	439	2079	1991	2588	1410	2379	1167	1610	2082	1656	1804	2851	987	1875	1976	2051	1703	2946	1118	1750	1619	6	0	0	0	0	0	1	0
Asia	IND_22	2843	884	1091	3213	2019	1737	2306	438	2077	1989	2589	1409	2374	1168	1607	2080	1585	1817	2879	1147	1752	2006	1854	1833	2943	1102	1709	1625	3	0	0	1	0	0	0	0
Asia	IND_223	2879	883	1088	3218	2022	1737	2307	439	2078	1989	2590	1409	2375	1167	1610	2081	1652	1726	2866	1223	1650	2063	1826	1828	2923	1044	1675	1662	6	0	0	0	0	0	1	0
Asia	IND_224	2875	881	1088	3212	2019	1736	2303	439	2075	1989	2587	1409	2371	1165	1608	2079	1612	1733	2885	1040	1848	1842	2025	1680	2872	1154	1810	1570	6	0	0	0	0	0	1	0
Asia	IND_228	2839	879	1090	3217	2014	1735	2307	438	2074	1991	2587	1408	2377	1164	1605	2074	1620	1762	2854	1078	1695	1693	1694	1736	2790	1054	1788	1653	7	0	0	0	0	0	0	1
Asia	IND_229	2883	887	1091	3220	2023	1741	2307	439	2079	1991	2589	1410	2378	1167	1610	2082	0	1	0	0	4	0	0	0	0	1	2	2	1	1	0	0	0	0	0	0
Asia	IND_231	2879	886	1094	3219	2020	1742	2307	438	2079	1992	2589	1412	2378	1167	1609	2083	1626	1797	2719	1083	1737	2115	1911	1882	2773	1019	1656	1713	6	0	0	0	0	0	1	0
Asia	IND_232	2775	861	1056	3156	1970	1687	2255	425	2026	1953	2530	1374	2330	1130	1555	2028	1549	1719	2756	1108	1674	2040	1839	1806	2814	992	1648	1566	2	0	1	0	0	0	0	0
Asia	IND_236	2844	883	1088	3213	2019	1737	2305	439	2080	1986	2588	1409	2374	1168	1610	2077	1688	1635	2887	1105	1663	1681	1741	1643	2839	1048	1753	1616	2	0	1	0	0	0	0	0
Asia	IND_248	2880	887	1090	3217	2024	1740	2306	439	2079	1990	2590	1410	2376	1167	1612	2083	1690	1729	2763	1095	1793	1627	1714	1697	2773	1084	1831	1587	7	0	0	0	0	0	0	1
Asia	IND_249	2843	884	1091	3217	2017	1738	2306	438	2077	1988	2588	1410	2374	1168	1608	2078	1631	1777	2849	1107	1756	1704	1676	1731	2893	1110	1746	1613	7	0	0	0	0	0	0	1
Asia	IND_25	2845	884	1092	3219	2019	1737	2307	438	2075	1991	2589	1407	2376	1167	1607	2080	1571	1729	2862	1039	1834	1812	2066	1633	2799	1250	1771	1589	3	0	0	1	0	0	0	0
Asia	IND_252	2464	801	985	2776	1773	1524	2014	391	1810	1759	2303	1233	2059	1042	1418	1838	1428	1519	2547	1001	1481	1507	1581	1537	2430	941	1610	1431	2	0	1	0	0	0	0	0
Asia	IND_256	2847	886	1090	3217	2024	1740	2306	439	2078	1991	2588	1411	2376	1166	1609	2084	1601	1736	2901	1177	1680	2008	1888	1853	2845	1022	1773	1621	7	0	0	0	0	0	0	1
Asia	IND_257	2824	861	1057	3118	1946	1696	2229	431	2014	1929	2507	1370	2292	1138	1567	2010	1565	1668	2819	1084	1646	1659	1713	1700	2712	1018	1789	1563	2	0	1	0	0	0	0	0
Asia	IND_258	2878	881	1092	3216	2018	1739	2306	439	2078	1991	2588	1413	2374	1164	1610	2078	1623	1752	2915	1134	1708	1823	1812	1770	2866	1066	1814	1629	7	0	0	0	0	0	0	1
Asia	IND_259	2843	879	1088	3205	2019	1735	2301	435	2073	1984	2584	1405	2370	1163	1606	2080	1643	1689	2875	1072	1911	1831	2053	1718	2838	1147	1839	1535	7	0	0	0	0	0	0	1
Asia	IND_261	2878	879	1088	3219	2021	1739	2305	439	2080	1989	2589	1409	2376	1167	1611	2078	1603	1719	2902	1110	1699	1706	1764	1747	2796	1055	1840	1610	7	0	0	0	0	0	0	1
Asia	IND_264	2876	885	1091	3219	2017	1741	2306	439	2075	1991	2587	1408	2377	1166	1609	2078	1642	1769	2831	1177	1698	2038	1823	1816	2930	1050	1686	1646	7	0	0	0	0	0	0	1
Asia	IND_265	2848	886	1090	3217	2021	1740	2307	439	2078	1989	2588	1410	2377	1167	1611	2081	1597	1749	2976	1075	1835	1865	2018	1765	2889	1156	1822	1613	2	0	1	0	0	0	0	0
Asia	IND_27	2879	889	1089	3219	2023	1740	2305	438	2079	1991	2589	1409	2378	1167	1608	2082	1693	1718	2857	1046	1839	1898	2075	1674	2840	1149	1799	1634	3	0	0	1	0	0	0	0
Asia	IND_270	2850	880	1089	3222	2021	1739	2306	439	2079	1990	2588	1409	2378	1166	1610	2079	1621	1836	2777	1183	1724	2048	1787	1861	2890	1034	1727	1621	2	0	1	0	0	0	0	0
Asia	IND_271	2757	863	1048	3064	1958	1679	2217	424	1982	1918	2486	1360	2282	1110	1563	2020	1587	1630	2774	1043	1841	1760	1977	1666	2754	1112	1771	1487	2	0	1	0	0	0	0	0
Asia	IND_273	2857	879	1084	3202	2007	1730	2293	437	2060	1981	2575	1399	2360	1162	1600	2071	1608	1725	2880	1039	1833	1832	2015	1672	2859	1147	1801	1566	7	0	0	0	0	0	0	1
Asia	IND_274	2845	883	1094	3224	2017	1740	2311	437	2081	1989	2589	1411	2381	1169	1608	2080	1653	1805	2854	986	1877	1977	2050	1700	2946	1117	1747	1617	3	0	0	1	0	0	0	0
Asia	IND_277	2840	884	1090	3207	2016	1734	2307	437	2078	1984	2586	1413	2371	1165	1607	2079	1625	1759	2853	1080	1693	1685	1693	1738	2791	1061	1789	1654	7	0	0	0	0	0	0	1
Asia	IND_278	2843	882	1090	3219	2021	1737	2304	440	2077	1991	2591	1409	2372	1166	1611	2078	1606	1719	2900	1112	1699	1708	1766	1749	2783	1053	1833	1604	7	0	0	0	0	0	0	1
Asia	IND_279	2765	851	1046	3138	1957	1680	2250	421	2010	1939	2516	1360	2318	1118	1547	2016	1547	1653	2839	1010	1816	1786	1995	1630	2802	1156	1732	1518	2	0	1	0	0	0	0	0
Asia	IND_282	2878	881	1089	3211	2019	1735	2302	437	2075	1989	2589	1407	2370	1165	1608	2079	1641	1769	2824	1176	1700	2035	1818	1817	2927	1048	1685	1647	7	0	0	0	0	0	0	1
Asia	IND_289	2846	883	1090	3219	2020	1733	2306	437	2076	1985	2585	1409	2374	1166	1603	2081	1647	1690	2876	1070	1916	1832	2053	1721	2838	1149	1839	1535	7	0	0	0	0	0	0	1
Asia	IND_29	2849	884	1091	3215	2020	1741	2308	438	2079	1988	2590	1410	2376	1168	1613	2081	1627	1789	2844	1074	1724	1651	1647	1709	2861	1108	1749	1653	7	0	0	0	0	0	0	1
Asia	IND_3	2840	881	1091	3210	2015	1737	2304	438	2074	1990	2588	1409	2371	1166	1607	2078	1620	1762	2853	1081	1691	1690	1695	1738	2790	1057	1788	1653	7	0	0	0	0	0	0	1
Asia	IND_300	2337	703	877	2735	1683	1439	1940	359	1756	1663	2185	1186	1998	968	1347	1720	1364	1453	2394	978	1431	1712	1557	1549	2428	820	1413	1325	3	0	0	1	0	0	0	0
Asia	IND_304	2846	882	1090	3215	2018	1736	2310	437	2077	1989	2589	1411	2376	1165	1608	2079	1646	1693	2877	1073	1918	1834	2054	1724	2840	1148	1841	1535	6	0	0	0	0	0	1	0
Asia	IND_306	2865	875	1081	3202	2012	1722	2294	434	2070	1980	2578	1405	2360	1158	1596	2073	1580	1759	2921	1082	1803	1865	1972	1719	2899	1162	1791	1583	6	0	0	0	0	0	1	0
Asia	IND_31	2847	885	1092	3226	2019	1741	2309	440	2079	1990	2586	1412	2381	1167	1610	2079	1630	1796	2717	1081	1739	2117	1910	1878	2773	1016	1657	1712	6	0	0	0	0	0	1	0
Asia	IND_312	2848	882	1087	3221	2022	1737	2307	439	2078	1987	2589	1409	2374	1167	1611	2081	1648	1693	2876	1073	1918	1835	2054	1724	2841	1147	1842	1537	6	0	0	0	0	0	1	0
Asia	IND_314	2841	882	1089	3208	2017	1736	2304	439	2075	1989	2588	1408	2372	1166	1608	2077	1623	1761	2852	1082	1691	1690	1694	1738	2792	1056	1790	1652	7	0	0	0	0	0	0	1
Asia	IND_315	2846	885	1093	3218	2019	1742	2310	439	2079	1990	2587	1414	2377	1166	1612	2081	1629	1797	2716	1083	1737	2116	1911	1880	2772	1017	1658	1711	3	0	0	1	0	0	0	0
Asia	IND_317	2849	883	1093	3219	2020	1740	2306	439	2080	1989	2586	1414	2378	1166	1611	2080	2020	1741	2307	439	2083	1991	2587	1413	2377	1166	1611	2082	6	0	0	0	0	0	1	0
Asia	IND_323	2849	886	1088	3218	2022	1739	2307	439	2078	1990	2589	1410	2377	1166	1610	2082	1689	1704	2855	1067	1832	1911	2080	1673	2840	1167	1777	1633	7	0	0	0	0	0	0	1
Asia	IND_324	2840	879	1079	3207	2014	1730	2301	435	2066	1983	2580	1401	2368	1163	1603	2078	1700	1705	2812	1089	1724	1698	1689	1699	2831	1034	1757	1632	2	0	1	0	0	0	0	0
Asia	IND_332	2856	873	1076	3201	2010	1716	2297	431	2055	1981	2571	1393	2369	1144	1594	2060	1594	1742	2788	1072	1724	1671	1643	1729	2809	1052	1745	1593	7	0	0	0	0	0	0	1
Asia	IND_335	2838	883	1090	3207	2015	1735	2307	437	2078	1987	2587	1414	2371	1164	1608	2078	1624	1760	2853	1079	1694	1687	1695	1738	2789	1060	1789	1654	7	0	0	0	0	0	0	1
Asia	IND_346	2873	880	1089	3214	2017	1736	2304	435	2075	1989	2587	1405	2374	1163	1605	2076	1637	1770	2826	1174	1702	2034	1817	1815	2927	1050	1684	1643	3	0	0	1	0	0	0	0
Asia	IND_352	2835	881	1089	3209	2012	1739	2302	436	2066	1986	2580	1402	2372	1162	1607	2075	1641	1735	2839	1032	1877	1832	2067	1646	2828	1210	1786	1605	3	0	0	1	0	0	0	0
Asia	IND_354	2833	884	1083	3210	2014	1735	2296	436	2069	1986	2580	1404	2368	1161	1603	2075	1629	1717	2880	1228	1670	2058	1835	1823	2942	1016	1709	1572	3	0	0	1	0	0	0	0
Asia	IND_356	1747	560	687	2037	1270	1065	1447	270	1312	1257	1650	896	1473	719	1007	1305	1063	1057	1802	640	1163	1212	1333	1069	1744	704	1137	1036	6	0	0	0	0	0	1	0
Asia	IND_357	2849	886	1090	3219	2024	1741	2306	438	2078	1994	2588	1412	2378	1163	1609	2083	1617	1810	2799	1023	1707	1756	1625	1771	2862	998	1706	1661	2	0	1	0	0	0	0	0
Asia	IND_361	2850	884	1092	3216	2020	1741	2307	438	2080	1989	2590	1409	2377	1169	1611	2080	1617	1785	2790	1085	1781	1706	1665	1794	2815	1053	1774	1606	2	0	1	0	0	0	0	0
Asia	IND_362	2304	742	901	2602	1679	1418	1869	362	1711	1637	2157	1148	1914	979	1323	1738	1410	1419	2351	830	1531	1551	1743	1400	2312	948	1477	1369	2	0	1	0	0	0	0	0
Asia	IND_369	2871	884	1092	3217	2019	1739	2306	437	2080	1988	2588	1410	2376	1168	1608	2081	1594	1744	2864	1063	1797	1818	1903	1700	2879	1136	1763	1576	7	0	0	0	0	0	0	1
Asia	IND_37	2845	881	1088	3210	2022	1734	2299	439	2074	1987	2586	1407	2368	1165	1607	2080	1606	1773	2889	1195	1675	2025	1839	1860	2885	1048	1736	1650	7	0	0	0	0	0	0	1
Asia	IND_370	2874	886	1091	3219	2018	1741	2306	439	2075	1991	2587	1408	2377	1166	1609	2078	1605	1719	2901	1111	1700	1706	1766	1748	2795	1055	1840	1607	7	0	0	0	0	0	0	1
Asia	IND_372	2875	884	1090	3217	2018	1738	2308	440	2078	1988	2588	1410	2376	1169	1608	2080	1584	1818	2881	1149	1752	2008	1853	1835	2955	1104	1715	1629	7	0	0	0	0	0	0	1
Asia	IND_374	2845	881	1093	3216	2019	1741	2307	436	2082	1989	2589	1413	2377	1168	1608	2082	1610	1812	2912	1160	1619	2063	1825	1790	2971	1026	1707	1655	7	0	0	0	0	0	0	1
Asia	IND_377	2840	879	1088	3200	2010	1732	2300	435	2073	1983	2584	1402	2370	1165	1602	2070	1592	1708	2902	1042	1854	1830	2035	1676	2861	1177	1772	1567	3	0	0	1	0	0	0	0
Asia	IND_379	2452	789	966	2737	1756	1504	1994	383	1797	1732	2265	1219	2042	1033	1395	1828	1444	1532	2425	1023	1508	1813	1679	1606	2463	889	1488	1413	2	0	1	0	0	0	0	0
Asia	IND_381	2840	879	1089	3206	2015	1735	2308	437	2079	1986	2587	1414	2372	1166	1607	2079	1622	1761	2852	1079	1689	1689	1692	1736	2790	1058	1788	1655	6	0	0	0	0	0	1	0
Asia	IND_394	2501	800	984	2784	1797	1533	2027	389	1823	1763	2307	1233	2080	1048	1420	1862	1450	1600	2499	967	1525	1453	1457	1518	2518	996	1555	1473	2	0	1	0	0	0	0	0
Asia	IND_395	2760	865	1068	3114	1976	1699	2242	432	2044	1951	2536	1387	2315	1140	1574	2026	1978	1699	2245	432	2045	1952	2536	1386	2317	1141	1574	2025	6	0	0	0	0	0	1	0
Asia	IND_396	2873	880	1091	3217	2016	1735	2306	438	2076	1987	2590	1407	2372	1169	1606	2080	1641	1769	2827	1178	1700	2037	1821	1814	2927	1051	1686	1642	7	0	0	0	0	0	0	1
Asia	IND_4	2844	881	1089	3217	2018	1739	2307	439	2077	1990	2589	1411	2374	1166	1610	2080	1640	1769	2833	1175	1700	2036	1824	1818	2917	1052	1680	1643	7	0	0	0	0	0	0	1
Asia	IND_40	2845	883	1091	3217	2018	1737	2307	438	2077	1991	2589	1409	2376	1167	1607	2079	1652	1728	2864	1223	1648	2066	1826	1827	2914	1042	1669	1658	6	0	0	0	0	0	1	0
Asia	IND_406	2845	885	1087	3216	2020	1735	2306	440	2077	1989	2588	1411	2372	1164	1609	2078	1582	1811	2880	1150	1745	2019	1855	1839	2939	1094	1707	1624	6	0	0	0	0	0	1	0
Asia	IND_414	2842	881	1092	3219	2013	1739	2310	438	2077	1989	2588	1411	2377	1167	1609	2078	1604	1719	2902	1111	1701	1705	1764	1746	2784	1056	1832	1605	7	0	0	0	0	0	0	1
Asia	IND_416	1322	452	569	1632	1041	861	1158	253	1097	1034	1338	696	1234	642	783	1023	865	903	1437	571	878	913	883	925	1334	531	893	878	7	0	0	0	0	0	0	1
Asia	IND_42	2833	884	1088	3205	2012	1725	2291	437	2067	1981	2572	1396	2369	1163	1590	2064	1615	1720	2838	1087	1671	1776	1706	1800	2777	1002	1736	1662	3	0	0	1	0	0	0	0
Asia	IND_420	2847	888	1088	3220	2022	1739	2308	439	2077	1990	2591	1409	2376	1167	1612	2082	1691	1720	2858	1047	1838	1898	2073	1674	2842	1148	1796	1632	2	0	1	0	0	0	0	0
Asia	IND_425	2843	884	1090	3211	2020	1736	2302	438	2079	1990	2588	1409	2374	1166	1607	2077	1654	1728	2860	1222	1648	2063	1825	1827	2909	1042	1670	1658	6	0	0	0	0	0	1	0
Asia	IND_426	2856	871	1083	3182	2003	1723	2279	432	2062	1966	2567	1392	2349	1158	1596	2060	1624	1760	2801	1164	1682	2025	1805	1803	2905	1042	1670	1633	7	0	0	0	0	0	0	1
Asia	IND_430	2877	884	1092	3220	2018	1737	2308	437	2078	1988	2590	1409	2375	1168	1607	2080	1607	1719	2899	1111	1701	1707	1764	1747	2796	1055	1839	1607	7	0	0	0	0	0	0	1
Asia	IND_44	2842	883	1089	3216	2022	1737	2303	439	2077	1989	2589	1409	2371	1167	1609	2081	1606	1719	2899	1111	1699	1704	1762	1749	2783	1056	1830	1607	7	0	0	0	0	0	0	1
Asia	IND_442	2855	880	1088	3201	2007	1733	2293	437	2063	1983	2577	1401	2361	1163	1600	2071	1610	1734	2844	1061	1832	1895	2093	1702	2777	1171	1817	1597	3	0	0	1	0	0	0	0
Asia	IND_448	2841	882	1084	3215	2017	1735	2304	440	2069	1986	2586	1406	2367	1164	1609	2077	1604	1718	2895	1111	1698	1706	1759	1748	2781	1050	1829	1601	7	0	0	0	0	0	0	1
Asia	IND_453	2842	883	1092	3221	2019	1739	2307	438	2078	1987	2587	1409	2376	1168	1609	2080	1622	1745	2807	1106	1736	1673	1655	1737	2813	1071	1762	1596	3	0	0	1	0	0	0	0
Asia	IND_458	2847	884	1092	3220	2023	1738	2304	441	2079	1992	2591	1410	2375	1166	1612	2079	1690	1730	2763	1096	1795	1628	1715	1695	2769	1083	1827	1584	3	0	0	1	0	0	0	0
Asia	IND_474	1713	544	659	1982	1264	1032	1445	292	1278	1235	1593	859	1493	738	943	1285	1026	1108	1745	635	1101	1128	1105	1107	1730	634	1106	1038	7	0	0	0	0	0	0	1
Asia	IND_48	2879	883	1090	3217	2022	1739	2305	437	2079	1990	2591	1408	2375	1167	1610	2082	1572	1728	2861	1039	1837	1811	2068	1636	2805	1250	1778	1593	7	0	0	0	0	0	0	1
Asia	IND_480	2844	884	1091	3214	2019	1737	2308	437	2082	1986	2588	1414	2373	1166	1610	2080	1587	1814	2881	1148	1754	2007	1853	1836	2944	1103	1708	1629	7	0	0	0	0	0	0	1
Asia	IND_482	2860	887	1091	3219	2023	1741	2307	439	2080	1991	2590	1411	2378	1168	1611	2083	2022	1741	2309	439	2082	1990	2589	1411	2377	1169	1612	2084	2	0	1	0	0	0	0	0
Asia	IND_484	2878	884	1091	3216	2021	1738	2305	439	2078	1990	2589	1409	2375	1166	1609	2079	1605	1719	2901	1111	1699	1705	1765	1749	2796	1056	1840	1608	7	0	0	0	0	0	0	1
Asia	IND_494	2519	778	968	2808	1769	1532	2019	388	1824	1731	2278	1232	2063	1045	1421	1836	1412	1517	2555	991	1487	1514	1557	1543	2463	933	1616	1396	2	0	1	0	0	0	0	0
Asia	IND_499	2840	882	1091	3209	2016	1735	2305	437	2076	1988	2588	1409	2372	1167	1605	2079	1623	1762	2851	1080	1692	1690	1693	1739	2790	1056	1789	1653	6	0	0	0	0	0	1	0
Asia	IND_502	2849	886	1090	3222	2022	1741	2306	439	2079	1991	2589	1409	2378	1167	1611	2080	1621	1805	2798	1026	1710	1755	1627	1769	2862	996	1707	1657	6	0	0	0	0	0	1	0
Asia	IND_503	2843	883	1090	3219	2017	1737	2310	439	2075	1989	2588	1408	2378	1167	1608	2077	1646	1693	2878	1074	1917	1834	2055	1722	2839	1148	1841	1534	7	0	0	0	0	0	0	1
Asia	IND_505	2841	882	1090	3223	2017	1739	2308	440	2077	1987	2586	1411	2376	1167	1609	2078	1606	1718	2901	1111	1700	1709	1765	1747	2784	1055	1831	1604	7	0	0	0	0	0	0	1
Asia	IND_506	2842	884	1092	3217	2020	1737	2304	439	2079	1988	2588	1410	2372	1168	1608	2080	1606	1719	2900	1111	1699	1706	1764	1749	2784	1056	1831	1603	7	0	0	0	0	0	0	1
Asia	IND_508	2832	872	1082	3190	1997	1715	2287	436	2048	1979	2563	1393	2356	1154	1582	2060	1588	1734	2774	1076	1721	1663	1644	1726	2793	1058	1736	1585	3	0	0	1	0	0	0	0
Asia	IND_514	2847	886	1091	3216	2023	1740	2304	439	2079	1990	2589	1410	2375	1167	1611	2082	1598	1750	2975	1075	1835	1865	2018	1765	2890	1157	1820	1613	6	0	0	0	0	0	1	0
Asia	IND_515	2427	764	968	2737	1729	1492	2002	397	1796	1697	2247	1227	2037	1031	1406	1782	1439	1481	2506	964	1637	1584	1783	1508	2462	982	1594	1317	2	0	1	0	0	0	0	0
Asia	IND_52	2721	851	1043	3032	1938	1664	2182	415	1980	1906	2476	1334	2256	1113	1537	1988	1550	1672	2594	1044	1608	1591	1546	1611	2646	1056	1617	1578	2	0	1	0	0	0	0	0
Asia	IND_520	2821	880	1090	3168	1999	1722	2291	432	2057	1973	2569	1395	2358	1154	1595	2059	1616	1767	2822	1099	1735	1691	1664	1714	2873	1104	1734	1601	7	0	0	0	0	0	0	1
Asia	IND_521	2467	793	978	2766	1781	1530	2003	391	1815	1755	2294	1236	2050	1036	1423	1850	1426	1515	2532	1007	1479	1498	1565	1530	2432	946	1608	1427	2	0	1	0	0	0	0	0
Asia	IND_523	2845	881	1091	3218	2018	1737	2308	436	2075	1992	2591	1409	2375	1165	1607	2080	1645	1695	2877	1073	1916	1834	2055	1720	2839	1148	1841	1535	7	0	0	0	0	0	0	1
Asia	IND_527	2475	793	970	2764	1780	1515	2008	383	1808	1748	2279	1225	2066	1039	1401	1845	1491	1515	2519	896	1616	1653	1850	1491	2466	1007	1580	1459	2	0	1	0	0	0	0	0
Asia	IND_534	2472	798	979	2760	1778	1527	2011	391	1811	1754	2300	1235	2057	1049	1420	1856	1417	1576	2460	1017	1518	1837	1670	1617	2514	911	1475	1414	2	0	1	0	0	0	0	0
Asia	IND_536	2842	884	1092	3218	2019	1738	2305	438	2077	1990	2589	1409	2373	1167	1608	2080	1585	1817	2880	1148	1751	2007	1855	1831	2942	1103	1709	1625	6	0	0	0	0	0	1	0
Asia	IND_537	2883	887	1091	3219	2024	1741	2306	439	2079	1991	2589	1410	2378	1167	1611	2083	1631	1796	2715	1083	1738	2115	1910	1880	2776	1019	1658	1713	7	0	0	0	0	0	0	1
Asia	IND_539	2845	881	1088	3216	2020	1739	2307	436	2080	1989	2592	1409	2375	1167	1611	2080	1605	1719	2900	1111	1700	1706	1763	1748	2785	1055	1833	1607	7	0	0	0	0	0	0	1
Asia	IND_542	2475	799	978	2765	1795	1527	2018	383	1817	1761	2302	1234	2066	1038	1421	1863	1434	1521	2549	999	1483	1508	1571	1530	2447	949	1611	1439	2	0	1	0	0	0	0	0
Asia	IND_543	2847	883	1089	3218	2022	1737	2305	438	2079	1990	2588	1411	2374	1165	1609	2081	1572	1726	2862	1039	1836	1812	2066	1635	2799	1250	1772	1589	2	0	1	0	0	0	0	0
Asia	IND_544	2619	799	996	2954	1873	1600	2112	396	1956	1830	2395	1314	2188	1086	1469	1922	1516	1548	2655	984	1760	1701	1904	1597	2622	1074	1705	1427	2	0	1	0	0	0	0	0
Asia	IND_545	2847	884	1091	3214	2019	1740	2306	438	2079	1989	2587	1411	2375	1166	1609	2080	2081	1609	2375	1168	1413	2588	1988	2078	2305	438	1740	2021	3	0	0	1	0	0	0	0
Asia	IND_547	2874	884	1088	3221	2018	1741	2305	439	2077	1989	2588	1408	2375	1168	1610	2079	1614	1736	2888	1041	1848	1846	2026	1683	2874	1153	1811	1570	7	0	0	0	0	0	0	1
Asia	IND_552	2835	882	1090	3212	2013	1739	2302	435	2065	1984	2582	1399	2370	1163	1608	2076	1640	1735	2841	1034	1877	1829	2067	1648	2828	1210	1788	1604	2	0	1	0	0	0	0	0
Asia	IND_558	2834	881	1091	3210	2012	1732	2299	436	2073	1988	2590	1404	2368	1167	1602	2074	1670	1779	2861	1168	1715	2053	1828	1851	2933	1017	1699	1668	3	0	0	1	0	0	0	0
Asia	IND_56	2879	887	1090	3220	2022	1742	2307	439	2078	1991	2588	1410	2378	1167	1610	2082	1670	1791	2855	1186	1675	2132	1861	1810	2989	1050	1657	1675	3	0	0	1	0	0	0	0
Asia	IND_560	2835	882	1090	3212	2015	1738	2300	436	2065	1982	2580	1400	2370	1163	1607	2076	1641	1735	2840	1034	1876	1829	2066	1649	2829	1209	1787	1604	2	0	1	0	0	0	0	0
Asia	IND_562	2844	882	1091	3212	2019	1737	2306	438	2078	1988	2590	1411	2371	1168	1609	2081	1561	1760	2947	1025	1852	1832	2037	1728	2861	1193	1795	1609	7	0	0	0	0	0	0	1
Asia	IND_563	2848	886	1093	3225	2020	1741	2308	436	2079	1993	2590	1408	2382	1166	1608	2079	1616	1809	2800	1023	1709	1756	1626	1767	2860	997	1706	1659	6	0	0	0	0	0	1	0
Asia	IND_564	2847	885	1094	3222	2019	1740	2309	438	2079	1990	2587	1409	2382	1167	1609	2078	1679	1743	2889	1032	1866	1905	2055	1658	2938	1174	1750	1623	6	0	0	0	0	0	1	0
Asia	IND_567	2878	884	1088	3217	2018	1738	2307	439	2077	1989	2590	1408	2375	1168	1609	2079	1614	1735	2888	1041	1847	1845	2026	1682	2875	1153	1812	1570	7	0	0	0	0	0	0	1
Asia	IND_572	2841	882	1088	3215	2017	1736	2303	438	2075	1989	2587	1409	2371	1166	1607	2079	1606	1775	2861	1066	1714	1642	1698	1672	2835	1110	1789	1612	3	0	0	1	0	0	0	0
Asia	IND_576	2848	884	1090	3211	2021	1736	2307	437	2081	1987	2588	1414	2372	1167	1608	2084	1653	1728	2863	1220	1649	2062	1826	1830	2914	1045	1671	1660	6	0	0	0	0	0	1	0
Asia	IND_579	2877	887	1090	3220	2023	1741	2306	438	2079	1991	2590	1408	2379	1166	1612	2080	1563	1733	2828	1071	1719	1702	1682	1750	2812	1082	1705	1612	6	0	0	0	0	0	1	0
Asia	IND_58	2799	870	1067	3150	1987	1713	2245	430	2041	1948	2527	1378	2328	1142	1580	2034	1583	1724	2689	1067	1647	1636	1586	1656	2728	1083	1657	1617	2	0	1	0	0	0	0	0
Asia	IND_584	1336	442	551	1514	1046	811	1088	236	1056	981	1282	668	1146	594	760	1007	820	913	1385	550	828	871	813	911	1343	521	876	785	6	0	0	0	0	0	1	0
Asia	IND_593	2850	886	1090	3217	2020	1743	2305	439	2082	1988	2586	1416	2374	1167	1612	2082	1657	1805	2849	986	1873	1978	2049	1704	2946	1117	1748	1619	6	0	0	0	0	0	1	0
Asia	IND_595	2810	870	1075	3152	1991	1715	2266	432	2038	1957	2540	1383	2335	1143	1587	2045	1592	1732	2688	1073	1653	1647	1591	1666	2738	1082	1669	1627	2	0	1	0	0	0	0	0
Asia	IND_598	2845	885	1092	3218	2019	1741	2308	438	2079	1988	2587	1413	2377	1167	1612	2081	1625	1757	2873	1185	1715	2029	1876	1846	2890	1044	1745	1620	3	0	0	1	0	0	0	0
Asia	IND_6	2844	882	1089	3210	2018	1736	2304	439	2075	1986	2585	1411	2369	1166	1608	2080	1643	1692	2876	1071	1915	1831	2054	1722	2839	1149	1839	1534	7	0	0	0	0	0	0	1
Asia	IND_61	2845	885	1091	3215	2021	1738	2304	438	2076	1989	2589	1407	2374	1168	1608	2081	1624	1787	2846	1072	1721	1650	1647	1710	2855	1108	1748	1652	7	0	0	0	0	0	0	1
Asia	IND_611	2819	871	1067	3174	1998	1720	2288	434	2059	1959	2557	1399	2350	1154	1597	2057	1626	1674	2850	1059	1895	1817	2020	1705	2827	1133	1821	1518	2	0	1	0	0	0	0	0
Asia	IND_614	2845	884	1092	3217	2018	1737	2310	438	2076	1989	2588	1408	2379	1168	1606	2080	1649	1799	2903	1041	1708	1696	1701	1745	2851	1053	1793	1706	2	0	1	0	0	0	0	0
Asia	IND_616	2693	842	1058	3029	1937	1672	2192	430	1993	1921	2492	1358	2254	1119	1552	1992	1566	1629	2735	1039	1830	1768	1984	1651	2698	1106	1771	1469	3	0	0	1	0	0	0	0
Asia	IND_623	2845	886	1093	3218	2020	1741	2306	438	2078	1991	2588	1411	2377	1166	1610	2081	1599	1751	2975	1076	1835	1867	2018	1763	2890	1155	1821	1612	6	0	0	0	0	0	1	0
Asia	IND_624	2462	795	973	2762	1782	1516	2001	385	1811	1748	2298	1232	2049	1035	1414	1843	1426	1515	2534	993	1478	1502	1561	1527	2428	946	1601	1426	2	0	1	0	0	0	0	0
Asia	IND_625	2875	884	1091	3218	2019	1738	2308	438	2078	1989	2589	1410	2376	1167	1609	2081	1629	1777	2852	1109	1756	1704	1675	1734	2902	1110	1752	1619	3	0	0	1	0	0	0	0
Asia	IND_628	2844	883	1088	3225	2017	1740	2308	436	2076	1987	2588	1407	2376	1167	1610	2080	1640	1769	2832	1173	1702	2037	1823	1815	2918	1053	1679	1643	7	0	0	0	0	0	0	1
Asia	IND_632	2879	883	1090	3216	2021	1738	2304	440	2077	1992	2589	1411	2373	1165	1609	2080	1606	1718	2900	1111	1699	1705	1764	1748	2797	1056	1838	1608	7	0	0	0	0	0	0	1
Asia	IND_634	2843	880	1090	3219	2017	1737	2311	436	2080	1985	2589	1411	2377	1166	1608	2080	1606	1717	2902	1111	1700	1708	1762	1747	2785	1054	1832	1606	7	0	0	0	0	0	0	1
Asia	IND_637	2848	883	1093	3220	2018	1741	2310	438	2078	1989	2586	1414	2376	1167	1612	2082	0	1	1	0	4	1	0	0	0	0	0	3	7	0	0	0	0	0	0	1
Asia	IND_641	2850	884	1092	3216	2019	1740	2308	439	2080	1988	2588	1414	2376	1167	1612	2081	1599	1752	2975	1074	1835	1868	2019	1764	2893	1154	1823	1614	6	0	0	0	0	0	1	0
Asia	IND_649	2845	883	1091	3218	2018	1736	2310	435	2075	1991	2590	1408	2378	1165	1605	2080	1647	1693	2876	1072	1917	1835	2055	1720	2839	1147	1841	1535	7	0	0	0	0	0	0	1
Asia	IND_651	2706	862	1064	3054	1960	1678	2210	423	2008	1918	2493	1352	2285	1123	1557	2002	1535	1764	2775	1111	1689	1938	1787	1774	2823	1060	1645	1563	3	0	0	1	0	0	0	0
Asia	IND_655	2497	808	988	2796	1801	1537	2032	390	1830	1767	2309	1245	2072	1051	1429	1869	1437	1594	2540	1082	1500	1811	1641	1665	2548	951	1545	1476	2	0	1	0	0	0	0	0
Asia	IND_66	2872	883	1092	3218	2017	1739	2307	438	2077	1990	2588	1410	2376	1166	1608	2079	1642	1770	2831	1176	1701	2038	1823	1818	2929	1051	1686	1644	7	0	0	0	0	0	0	1
Asia	IND_663	1818	589	737	2130	1358	1129	1528	301	1396	1314	1743	915	1555	794	1062	1361	1108	1211	1927	786	1132	1432	1256	1228	1904	655	1157	1085	7	0	0	0	0	0	0	1
Asia	IND_664	2846	886	1092	3223	2020	1740	2308	436	2079	1992	2590	1408	2381	1166	1608	2079	1599	1736	2905	1176	1682	2009	1887	1852	2845	1019	1772	1622	2	0	1	0	0	0	0	0
Asia	IND_666	2879	885	1092	3215	2020	1738	2306	439	2076	1990	2586	1412	2376	1166	1609	2080	1680	1679	2942	1063	1832	1881	2089	1661	2902	1189	1761	1643	7	0	0	0	0	0	0	1
Asia	IND_67	2846	887	1093	3221	2022	1740	2308	438	2078	1990	2590	1409	2378	1168	1610	2082	1563	1733	2827	1072	1718	1702	1682	1749	2811	1083	1701	1610	3	0	0	1	0	0	0	0
Asia	IND_678	2438	784	960	2729	1758	1499	1982	382	1794	1727	2268	1215	2030	1031	1392	1819	1425	1515	2487	929	1601	1603	1768	1457	2462	992	1585	1344	2	0	1	0	0	0	0	0
Asia	IND_68	2874	884	1092	3214	2019	1740	2306	438	2078	1990	2588	1410	2376	1166	1609	2079	1605	1718	2901	1111	1700	1704	1766	1748	2795	1056	1839	1607	7	0	0	0	0	0	0	1
Asia	IND_680	2854	878	1083	3197	2010	1723	2297	434	2061	1981	2574	1398	2366	1155	1593	2068	1617	1800	2776	1022	1718	1738	1620	1752	2864	994	1723	1636	6	0	0	0	0	0	1	0
Asia	IND_681	2876	885	1091	3218	2017	1740	2306	439	2078	1988	2588	1410	2374	1169	1610	2079	1606	1718	2901	1111	1701	1705	1766	1749	2796	1056	1839	1607	7	0	0	0	0	0	0	1
Asia	IND_685	2877	880	1090	3221	2018	1736	2310	439	2077	1985	2589	1410	2374	1167	1612	2079	1641	1768	2833	1177	1700	2040	1822	1819	2931	1049	1686	1646	7	0	0	0	0	0	0	1
Asia	IND_69	2845	884	1091	3215	2020	1738	2305	438	2075	1990	2589	1409	2373	1167	1608	2082	1625	1787	2845	1072	1722	1651	1647	1710	2855	1107	1748	1652	7	0	0	0	0	0	0	1
Asia	IND_690	2879	888	1091	3222	2023	1741	2306	438	2078	1991	2589	1409	2378	1166	1611	2082	2017	1722	2364	498	2056	2020	2561	1441	2433	1132	1632	2042	2	0	1	0	0	0	0	0
Asia	IND_697	2842	885	1090	3212	2019	1734	2307	437	2079	1986	2588	1412	2371	1165	1608	2080	1604	1717	2900	1110	1701	1703	1761	1751	2781	1057	1832	1604	7	0	0	0	0	0	0	1
Asia	IND_702	2845	883	1088	3216	2021	1738	2306	438	2078	1989	2590	1409	2373	1166	1611	2080	1604	1719	2901	1111	1699	1707	1764	1750	2785	1056	1833	1607	7	0	0	0	0	0	0	1
Asia	IND_708	2804	864	1074	3148	1992	1699	2262	434	2037	1950	2544	1389	2327	1146	1581	2049	1614	1674	2824	1055	1884	1810	2014	1699	2784	1131	1809	1523	2	0	1	0	0	0	0	0
Asia	IND_71	2877	884	1087	3219	2019	1737	2306	439	2075	1988	2588	1407	2374	1167	1609	2079	1604	1719	2900	1110	1700	1703	1760	1747	2797	1056	1839	1607	7	0	0	0	0	0	0	1
Asia	IND_711	2880	886	1090	3224	2017	1741	2312	436	2076	1990	2591	1411	2376	1167	1610	2083	1670	1789	2855	1188	1676	2136	1862	1809	2988	1047	1658	1673	6	0	0	0	0	0	1	0
Asia	IND_714	2877	885	1088	3219	2022	1739	2303	441	2076	1989	2587	1406	2376	1168	1609	2078	1605	1719	2901	1110	1699	1704	1765	1749	2794	1057	1841	1609	7	0	0	0	0	0	0	1
Asia	IND_716	2532	776	953	2913	1814	1542	2065	386	1878	1784	2337	1265	2127	1035	1444	1849	1498	1587	2588	1045	1549	1840	1645	1674	2646	903	1518	1494	3	0	0	1	0	0	0	0
Asia	IND_717	2388	778	943	2671	1737	1473	1930	372	1775	1698	2222	1194	1987	1013	1363	1788	1388	1472	2458	962	1442	1452	1522	1484	2354	919	1543	1395	2	0	1	0	0	0	0	0
Asia	IND_724	2846	883	1090	3214	2021	1739	2304	438	2078	1989	2586	1409	2377	1168	1606	2081	1626	1787	2844	1070	1723	1651	1647	1710	2855	1107	1749	1653	3	0	0	1	0	0	0	0
Asia	IND_733	2767	854	1049	3139	1960	1669	2239	420	2015	1938	2524	1361	2302	1119	1552	2005	1573	1721	2785	975	1755	1848	1974	1598	2816	1136	1694	1582	2	0	1	0	0	0	0	0
Asia	IND_735	2845	884	1092	3217	2019	1738	2307	437	2078	1990	2589	1410	2376	1167	1606	2081	1647	1695	2876	1075	1915	1836	2054	1724	2839	1147	1841	1536	7	0	0	0	0	0	0	1
Asia	IND_746	2732	848	1055	3071	1937	1676	2215	427	1991	1920	2501	1353	2282	1126	1554	1994	1591	1639	2779	1041	1834	1771	1985	1660	2743	1106	1781	1472	3	0	0	1	0	0	0	0
Asia	IND_760	2824	878	1086	3204	2011	1732	2293	438	2064	1983	2576	1401	2363	1162	1599	2072	1649	1795	2830	981	1868	1966	2042	1693	2925	1110	1739	1609	6	0	0	0	0	0	1	0
Asia	IND_763	2871	883	1095	3220	2020	1739	2308	439	2080	1991	2589	1413	2378	1167	1608	2081	1564	1732	2827	1072	1720	1702	1684	1748	2807	1082	1704	1609	6	0	0	0	0	0	1	0
Asia	IND_767	2843	880	1089	3207	2018	1734	2302	436	2076	1985	2585	1412	2367	1163	1606	2081	1642	1690	2877	1071	1913	1830	2053	1723	2836	1148	1839	1534	3	0	0	1	0	0	0	0
Asia	IND_768	2845	883	1091	3220	2020	1736	2308	438	2079	1987	2586	1409	2378	1168	1605	2080	1647	1694	2876	1072	1918	1836	2054	1725	2839	1148	1841	1535	7	0	0	0	0	0	0	1
Asia	IND_787	2837	882	1091	3211	2016	1734	2306	439	2075	1987	2585	1409	2374	1167	1604	2078	1606	1765	2835	1056	1700	1706	1718	1747	2764	1062	1771	1666	6	0	0	0	0	0	1	0
Asia	IND_79	2858	884	1093	3218	2020	1743	2308	438	2081	1991	2588	1415	2378	1165	1613	2082	2020	1742	2309	439	2082	1992	2588	1413	2377	1165	1613	2084	7	0	0	0	0	0	0	1
Asia	IND_792	2876	887	1093	3218	2020	1741	2308	438	2079	1991	2588	1411	2380	1166	1609	2080	1693	1718	2857	1047	1841	1899	2076	1674	2840	1148	1797	1634	7	0	0	0	0	0	0	1
Asia	IND_794	2844	884	1089	3218	2020	1739	2306	439	2077	1989	2589	1408	2375	1167	1610	2079	1606	1719	2900	1111	1701	1705	1764	1749	2785	1056	1833	1605	7	0	0	0	0	0	0	1
Asia	IND_8	2478	798	976	2776	1778	1520	2013	387	1818	1754	2300	1235	2055	1041	1411	1850	1442	1528	2535	883	1661	1610	1837	1476	2485	1048	1565	1423	2	0	1	0	0	0	0	0
Asia	IND_801	2843	883	1090	3221	2018	1736	2304	436	2075	1990	2587	1409	2373	1164	1606	2079	1652	1727	2862	1221	1649	2066	1825	1825	2909	1041	1669	1658	6	0	0	0	0	0	1	0
Asia	IND_802	2835	879	1081	3198	2012	1729	2298	434	2067	1978	2578	1403	2364	1161	1601	2074	1601	1804	2898	1155	1614	2048	1810	1783	2954	1021	1701	1651	7	0	0	0	0	0	0	1
Asia	IND_808	2879	886	1094	3220	2020	1741	2307	438	2081	1990	2588	1411	2379	1168	1610	2080	1623	1731	2855	1096	1677	1786	1719	1805	2790	1012	1747	1674	7	0	0	0	0	0	0	1
Asia	IND_81	2736	855	1059	3129	1956	1685	2240	428	2023	1926	2511	1370	2308	1144	1553	2020	1538	1705	2722	1108	1666	2034	1832	1800	2785	973	1631	1544	2	0	1	0	0	0	0	0
Asia	IND_815	2874	884	1088	3214	2022	1737	2307	438	2078	1986	2588	1408	2375	1167	1609	2081	1605	1772	2866	1076	1716	1634	1688	1677	2857	1113	1798	1612	7	0	0	0	0	0	0	1
Asia	IND_816	2797	867	1076	3168	1978	1713	2276	436	2050	1960	2559	1392	2336	1156	1590	2039	1650	1757	2823	1159	1697	2031	1803	1831	2900	1003	1675	1643	3	0	0	1	0	0	0	0
Asia	IND_82	2878	884	1087	3223	2018	1740	2305	440	2076	1987	2587	1406	2375	1169	1610	2078	1643	1768	2830	1173	1702	2037	1825	1817	2928	1052	1686	1649	7	0	0	0	0	0	0	1
Asia	IND_823	2813	870	1077	3188	1998	1719	2281	433	2060	1961	2557	1399	2348	1153	1593	2058	1594	1699	2852	1016	1866	1833	2032	1686	2816	1155	1758	1563	2	0	1	0	0	0	0	0
Asia	IND_828	2874	882	1092	3217	2015	1739	2307	439	2079	1990	2588	1410	2378	1167	1608	2076	1606	1719	2901	1110	1701	1705	1766	1746	2795	1055	1839	1607	7	0	0	0	0	0	0	1
Asia	IND_830	2501	803	994	2831	1802	1550	2054	400	1843	1783	2331	1262	2091	1060	1440	1872	1460	1565	2575	952	1661	1653	1829	1505	2544	1032	1622	1398	2	0	1	0	0	0	0	0
Asia	IND_834	2875	887	1093	3219	2017	1741	2310	435	2081	1990	2590	1412	2380	1167	1608	2080	1625	1757	2873	1185	1717	2032	1877	1847	2889	1043	1746	1621	2	0	1	0	0	0	0	0
Asia	IND_838	2846	886	1093	3221	2019	1740	2309	438	2077	1993	2590	1410	2379	1167	1607	2081	1655	1805	2851	988	1875	1978	2050	1700	2945	1116	1747	1617	6	0	0	0	0	0	1	0
Asia	IND_846	2879	887	1088	3217	2019	1739	2307	438	2076	1992	2593	1407	2374	1167	1611	2079	1655	1803	2846	987	1875	1978	2051	1702	2942	1116	1750	1619	6	0	0	0	0	0	1	0
Asia	IND_86	2847	887	1091	3225	2023	1740	2306	438	2078	1992	2591	1408	2377	1165	1611	2080	1653	1804	2855	987	1876	1977	2052	1703	2945	1117	1748	1618	6	0	0	0	0	0	1	0
Asia	IND_861	2848	885	1090	3220	2021	1740	2310	438	2079	1989	2588	1412	2378	1166	1609	2083	1669	1789	2856	1188	1673	2134	1859	1809	2989	1049	1656	1672	6	0	0	0	0	0	1	0
Asia	IND_865	2834	883	1090	3208	2013	1739	2300	435	2067	1982	2582	1400	2370	1166	1607	2077	1640	1735	2841	1034	1875	1829	2067	1650	2828	1211	1787	1604	2	0	1	0	0	0	0	0
Asia	IND_867	2878	887	1090	3218	2024	1740	2306	439	2078	1992	2589	1410	2377	1166	1611	2083	1682	1680	2939	1062	1833	1883	2091	1663	2901	1189	1763	1644	6	0	0	0	0	0	1	0
Asia	IND_869	2842	884	1091	3215	2020	1738	2304	438	2076	1989	2588	1410	2371	1167	1608	2082	1605	1719	2900	1110	1699	1704	1764	1749	2784	1056	1831	1604	7	0	0	0	0	0	0	1
Asia	IND_879	2493	803	989	2803	1798	1546	2030	395	1828	1775	2323	1248	2073	1050	1431	1870	1444	1535	2566	1016	1498	1520	1581	1545	2467	956	1623	1451	2	0	1	0	0	0	0	0
Asia	IND_89	2879	886	1090	3218	2022	1740	2307	438	2078	1991	2589	1410	2376	1166	1610	2082	1601	1736	2901	1177	1682	2008	1888	1853	2846	1021	1776	1622	7	0	0	0	0	0	0	1
Asia	IND_890	2551	820	1018	2888	1847	1585	2099	406	1874	1832	2381	1279	2158	1067	1468	1914	1464	1582	2641	1035	1544	1568	1621	1599	2527	976	1678	1480	3	0	0	1	0	0	0	0
Asia	IND_891	2846	881	1087	3213	2022	1735	2300	437	2074	1986	2584	1406	2368	1163	1608	2080	1644	1690	2874	1072	1914	1832	2053	1720	2839	1147	1840	1534	7	0	0	0	0	0	0	1
Asia	IND_892	2688	811	1014	3060	1913	1637	2199	408	1967	1888	2458	1322	2274	1090	1522	1949	1518	1608	2694	1014	1630	1636	1619	1627	2685	996	1601	1535	3	0	0	1	0	0	0	0
Asia	IND_898	2845	885	1092	3209	2021	1738	2303	437	2081	1987	2588	1413	2371	1166	1610	2082	1633	1777	2847	1109	1755	1703	1677	1734	2893	1110	1748	1615	7	0	0	0	0	0	0	1
Asia	IND_9	2863	882	1082	3206	2011	1734	2295	437	2065	1983	2580	1402	2362	1163	1604	2074	1607	1746	2793	1081	1731	1670	1651	1735	2807	1062	1749	1603	7	0	0	0	0	0	0	1
Asia	IND_908	2458	787	972	2745	1772	1516	1994	383	1799	1727	2267	1220	2043	1032	1402	1834	1417	1505	2534	984	1466	1487	1558	1518	2417	938	1591	1416	2	0	1	0	0	0	0	0
Asia	IND_91	2846	884	1091	3218	2018	1738	2307	437	2074	1991	2589	1407	2376	1166	1607	2079	1645	1695	2876	1073	1916	1835	2055	1723	2839	1147	1841	1535	6	0	0	0	0	0	1	0
Asia	IND_914	2877	883	1090	3212	2018	1736	2305	437	2078	1986	2587	1410	2372	1166	1608	2077	1605	1719	2899	1110	1699	1704	1761	1747	2795	1056	1838	1607	2	0	1	0	0	0	0	0
Asia	IND_93	2841	881	1086	3215	2015	1734	2302	438	2073	1986	2584	1408	2370	1163	1607	2075	1605	1773	2860	1066	1713	1641	1694	1671	2832	1107	1789	1611	3	0	0	1	0	0	0	0
Asia	IND_932	2775	853	1058	3157	1974	1683	2256	426	2030	1956	2532	1375	2333	1132	1559	2028	1630	1696	2792	1115	1699	2003	1856	1802	2838	988	1687	1608	2	0	1	0	0	0	0	0
Asia	IND_933	2879	886	1087	3220	2021	1739	2306	438	2081	1989	2590	1409	2377	1168	1609	2079	1620	1741	2865	1063	1843	1903	2100	1709	2796	1182	1826	1611	3	0	0	1	0	0	0	0
Asia	IND_94	2849	884	1093	3216	2021	1742	2304	440	2079	1991	2585	1413	2378	1163	1611	2078	1653	1805	2852	987	1872	1975	2050	1700	2945	1116	1749	1618	3	0	0	1	0	0	0	0
Asia	IND_946	2845	884	1091	3218	2019	1737	2307	437	2078	1990	2589	1409	2377	1167	1606	2080	1627	1787	2844	1071	1725	1650	1646	1706	2855	1108	1748	1652	3	0	0	1	0	0	0	0
Asia	IND_95	2873	884	1090	3218	2016	1740	2307	438	2078	1988	2588	1410	2375	1168	1609	2080	1612	1734	2891	1039	1847	1844	2029	1683	2871	1154	1811	1570	6	0	0	0	0	0	1	0
Asia	IND_956	2839	880	1091	3213	2015	1736	2304	437	2075	1989	2588	1407	2374	1166	1606	2075	1620	1761	2854	1080	1692	1690	1695	1737	2790	1055	1788	1653	6	0	0	0	0	0	1	0
Asia	IND_960	2848	883	1092	3214	2019	1741	2307	439	2080	1989	2588	1413	2375	1167	1612	2082	1625	1837	2773	1184	1722	2047	1789	1863	2889	1034	1726	1621	3	0	0	1	0	0	0	0
Asia	IND_962	2832	881	1085	3208	2011	1735	2297	436	2069	1982	2580	1403	2366	1164	1604	2073	1602	1806	2904	1154	1612	2051	1820	1778	2960	1025	1703	1646	3	0	0	1	0	0	0	0
Asia	IND_97	2842	883	1091	3219	2018	1736	2308	438	2074	1990	2589	1408	2375	1166	1607	2079	1604	1718	2902	1110	1701	1704	1763	1747	2784	1055	1831	1604	7	0	0	0	0	0	0	1
Asia	IND_976	2505	802	992	2805	1805	1547	2043	389	1830	1769	2317	1243	2095	1051	1439	1869	1440	1543	2588	1005	1508	1513	1585	1549	2474	954	1633	1448	2	0	1	0	0	0	0	0
Asia	IND_978	2566	795	989	2914	1856	1554	2103	400	1897	1815	2382	1283	2145	1063	1457	1907	1465	1548	2650	1016	1544	1559	1618	1592	2539	959	1656	1459	2	0	1	0	0	0	0	0
Asia	IND_981	1542	554	627	1807	1210	958	1336	294	1225	1184	1536	806	1388	707	889	1207	1012	985	1681	669	1028	1172	1151	1090	1646	606	1002	970	7	0	0	0	0	0	0	1
Asia	IND_984	2848	885	1091	3220	2021	1741	2307	438	2080	1991	2590	1410	2378	1167	1609	2081	1653	1804	2853	988	1875	1976	2051	1702	2946	1118	1748	1617	6	0	0	0	0	0	1	0
Asia	IND_987	2846	884	1091	3216	2018	1736	2308	437	2074	1991	2590	1412	2371	1164	1608	2082	1645	1694	2878	1073	1916	1833	2054	1724	2840	1149	1840	1535	7	0	0	0	0	0	0	1
Asia	IND_996	2846	884	1087	3216	2017	1737	2309	437	2077	1989	2589	1410	2376	1168	1606	2080	1646	1692	2879	1073	1916	1833	2052	1725	2840	1148	1841	1535	7	0	0	0	0	0	0	1
Asia	IND_997	2848	886	1092	3220	2019	1741	2308	439	2081	1989	2586	1416	2376	1166	1610	2082	1618	1809	2798	1022	1708	1756	1625	1772	2860	997	1706	1659	6	0	0	0	0	0	1	0
Asia	Iran_1	2846	882	1090	3199	2014	1734	2299	435	2073	1980	2580	1405	2367	1163	1609	2075	1675	1677	2928	1060	1821	1876	2080	1654	2895	1190	1760	1633	3	0	0	1	0	0	0	0
Asia	Iran_2	2848	884	1089	3209	2022	1738	2307	436	2079	1986	2587	1409	2376	1165	1612	2080	1680	1679	2938	1061	1829	1879	2086	1658	2901	1191	1763	1640	3	0	0	1	0	0	0	0
Asia	Iran_3	2762	859	1059	3116	1939	1687	2225	422	2009	1916	2495	1369	2286	1135	1552	2011	1637	1646	2742	1047	1680	1666	1702	1634	2745	1032	1691	1584	2	0	1	0	0	0	0	0
Asia	Iran_5	2850	888	1092	3215	2023	1737	2306	437	2082	1986	2586	1414	2375	1165	1611	2084	1683	1680	2941	1063	1833	1879	2085	1663	2901	1192	1763	1641	6	0	0	0	0	0	1	0
Asia	IRQ_1	2844	880	1086	3205	2013	1729	2296	438	2065	1979	2577	1405	2357	1162	1604	2077	1613	1736	2874	1169	1694	2022	1872	1867	2859	1016	1735	1635	2	0	1	0	0	0	0	0
Asia	ISR_11	2839	879	1090	3208	2015	1735	2305	436	2073	1988	2586	1409	2371	1164	1605	2078	1611	1761	2732	1083	1682	1674	1620	1686	2772	1098	1690	1641	7	0	0	0	0	0	0	1
Asia	JPN_1	2835	879	1091	3203	2015	1733	2297	436	2068	1984	2584	1401	2365	1166	1603	2078	1597	1737	2808	1032	1853	1872	2046	1680	2811	1140	1789	1542	1	1	0	0	0	0	0	0
Asia	JPN_10	2848	884	1089	3223	2020	1739	2307	439	2076	1987	2586	1409	2376	1167	1610	2081	1626	1785	2846	1073	1726	1650	1647	1709	2856	1108	1751	1653	7	0	0	0	0	0	0	1
Asia	JPN_104	2840	880	1084	3212	2020	1737	2300	435	2073	1989	2586	1403	2373	1166	1603	2080	1611	1742	2753	1085	1681	1667	1641	1698	2752	1104	1700	1656	7	0	0	0	0	0	0	1
Asia	JPN_105	2840	880	1082	3212	2018	1737	2301	436	2072	1990	2587	1404	2372	1167	1603	2080	1611	1743	2752	1084	1681	1669	1642	1698	2751	1103	1700	1656	7	0	0	0	0	0	0	1
Asia	JPN_109	2840	879	1086	3216	2017	1734	2302	438	2072	1989	2587	1404	2372	1165	1604	2075	1611	1759	2734	1084	1683	1674	1619	1686	2770	1098	1691	1641	7	0	0	0	0	0	0	1
Asia	JPN_12	2850	887	1091	3230	2021	1741	2310	439	2075	1991	2589	1408	2379	1167	1611	2081	173	123	110	109	120	129	92	122	133	59	139	134	1	1	0	0	0	0	0	0
Asia	JPN_121	2839	879	1083	3211	2019	1735	2301	437	2072	1989	2588	1404	2369	1167	1604	2081	1610	1743	2752	1085	1681	1667	1641	1699	2750	1104	1700	1655	7	0	0	0	0	0	0	1
Asia	JPN_129	2841	881	1088	3216	2013	1736	2305	435	2068	1988	2589	1402	2370	1166	1606	2077	1612	1761	2731	1083	1681	1676	1621	1684	2770	1094	1692	1642	7	0	0	0	0	0	0	1
Asia	JPN_130	2842	878	1088	3213	2016	1733	2304	436	2075	1987	2587	1404	2375	1166	1603	2074	1608	1758	2738	1085	1681	1671	1617	1686	2772	1098	1692	1640	7	0	0	0	0	0	0	1
Asia	JPN_131	2841	877	1088	3220	2017	1734	2301	438	2072	1983	2582	1403	2371	1167	1604	2076	1611	1758	2734	1082	1683	1672	1615	1690	2772	1092	1690	1642	7	0	0	0	0	0	0	1
Asia	JPN_137	2853	883	1085	3220	2024	1738	2307	437	2077	1990	2592	1407	2376	1168	1609	2085	1631	1774	2836	1065	1742	1664	1678	1716	2842	1088	1771	1635	7	0	0	0	0	0	0	1
Asia	JPN_139	2856	881	1085	3222	2024	1735	2308	443	2078	1986	2587	1406	2380	1168	1611	2077	1635	1747	2860	1099	1755	1626	1669	1708	2857	1108	1789	1607	7	0	0	0	0	0	0	1
Asia	JPN_15	2861	872	1083	3202	2011	1722	2291	430	2073	1980	2580	1406	2358	1158	1594	2072	1601	1740	2788	1079	1728	1671	1647	1733	2808	1062	1739	1602	7	0	0	0	0	0	0	1
Asia	JPN_16	2880	887	1090	3217	2023	1740	2306	439	2079	1990	2589	1410	2377	1168	1609	2083	1694	1719	2856	1046	1839	1898	2076	1673	2842	1149	1799	1634	4	0	0	0	1	0	0	0
Asia	JPN_17	2871	884	1089	3213	2019	1736	2303	437	2078	1991	2589	1411	2371	1166	1605	2081	1606	1715	2901	1109	1697	1706	1764	1749	2792	1055	1837	1606	7	0	0	0	0	0	0	1
Asia	JPN_18	2879	884	1089	3221	2021	1737	2307	439	2077	1987	2589	1408	2374	1168	1610	2081	1562	1761	2948	1024	1853	1836	2036	1729	2873	1192	1802	1617	7	0	0	0	0	0	0	1
Asia	JPN_19	2877	884	1086	3217	2020	1735	2306	439	2078	1987	2588	1409	2374	1168	1607	2081	1612	1732	2891	1038	1847	1847	2028	1683	2879	1155	1806	1574	4	0	0	0	1	0	0	0
Asia	JPN_2	2838	882	1088	3204	2016	1735	2300	437	2070	1987	2587	1403	2368	1167	1604	2079	1640	1752	2892	1125	1679	1994	1859	1812	2894	1013	1722	1669	7	0	0	0	0	0	0	1
Asia	JPN_21	2858	888	1093	3214	2023	1742	2307	439	2081	1990	2589	1413	2376	1168	1612	2084	1618	1810	2797	1023	1707	1756	1628	1774	2860	998	1707	1660	7	0	0	0	0	0	0	1
Asia	JPN_22	2878	884	1091	3217	2020	1739	2306	438	2078	1990	2589	1409	2376	1167	1609	2080	1561	1762	2948	1024	1853	1835	2037	1729	2872	1192	1802	1617	7	0	0	0	0	0	0	1
Asia	JPN_24	2843	883	1089	3215	2019	1739	2304	439	2079	1989	2589	1410	2373	1168	1609	2080	1641	1763	2787	1148	1707	2096	1902	1829	2852	1003	1713	1621	4	0	0	0	1	0	0	0
Asia	JPN_26	2843	882	1089	3216	2020	1739	2304	439	2079	1989	2589	1410	2373	1168	1609	2080	1621	1728	2879	983	1882	1831	2068	1669	2847	1186	1762	1615	4	0	0	0	1	0	0	0
Asia	JPN_27	2841	878	1088	3216	2014	1734	2306	438	2072	1985	2585	1404	2374	1167	1605	2074	1608	1760	2736	1084	1682	1674	1618	1687	2772	1097	1691	1641	7	0	0	0	0	0	0	1
Asia	JPN_3	2877	884	1089	3217	2022	1739	2304	439	2078	1990	2589	1409	2374	1167	1610	2081	1605	1719	2901	1111	1699	1705	1764	1750	2796	1056	1840	1609	7	0	0	0	0	0	0	1
Asia	JPN_31	2842	877	1088	3211	2019	1733	2302	438	2075	1986	2585	1405	2373	1165	1604	2074	1611	1760	2733	1084	1681	1673	1618	1686	2772	1098	1692	1641	7	0	0	0	0	0	0	1
Asia	JPN_33	2841	877	1088	3219	2018	1736	2301	437	2071	1986	2585	1401	2372	1167	1605	2077	1611	1760	2733	1084	1682	1673	1618	1684	2773	1097	1691	1641	7	0	0	0	0	0	0	1
Asia	JPN_35	2841	877	1087	3219	2017	1735	2303	437	2071	1986	2586	1401	2373	1167	1605	2076	1611	1760	2733	1084	1682	1674	1617	1684	2773	1096	1691	1641	7	0	0	0	0	0	0	1
Asia	JPN_37	2841	880	1088	3213	2016	1736	2301	438	2071	1988	2586	1405	2369	1166	1606	2077	1611	1760	2733	1084	1681	1672	1619	1686	2772	1098	1690	1641	7	0	0	0	0	0	0	1
Asia	JPN_38	2840	879	1089	3214	2017	1735	2302	439	2071	1988	2584	1405	2372	1165	1605	2076	1610	1761	2734	1084	1680	1672	1618	1685	2772	1098	1691	1641	7	0	0	0	0	0	0	1
Asia	JPN_4	2880	886	1090	3218	2025	1740	2304	439	2080	1990	2589	1410	2375	1168	1610	2084	1601	1736	2902	1177	1681	2007	1888	1855	2848	1023	1776	1623	4	0	0	0	1	0	0	0
Asia	JPN_52	2841	880	1087	3215	2017	1735	2302	439	2071	1987	2584	1405	2371	1165	1606	2076	1611	1759	2734	1083	1682	1672	1619	1686	2772	1098	1691	1641	7	0	0	0	0	0	0	1
Asia	JPN_6	2877	884	1090	3220	2022	1739	2304	439	2078	1988	2588	1408	2374	1168	1610	2081	1586	1817	2880	1148	1752	2008	1854	1833	2957	1103	1715	1631	7	0	0	0	0	0	0	1
Asia	JPN_63	2841	880	1087	3214	2016	1736	2302	438	2071	1988	2585	1405	2371	1165	1606	2076	1611	1760	2733	1084	1680	1673	1618	1685	2772	1097	1691	1641	7	0	0	0	0	0	0	1
Asia	JPN_7	2878	885	1088	3221	2022	1738	2305	438	2077	1988	2590	1407	2373	1168	1610	2082	1586	1817	2880	1147	1752	2008	1853	1832	2958	1103	1715	1631	7	0	0	0	0	0	0	1
Asia	JPN_71	2842	882	1088	3209	2018	1735	2301	438	2072	1987	2583	1405	2373	1166	1603	2077	1610	1760	2734	1084	1681	1671	1617	1690	2772	1099	1692	1641	7	0	0	0	0	0	0	1
Asia	JPN_73	2841	878	1089	3215	2020	1735	2299	440	2075	1984	2581	1404	2373	1167	1605	2075	1609	1760	2734	1084	1682	1671	1617	1690	2771	1099	1691	1641	7	0	0	0	0	0	0	1
Asia	JPN_75	2833	878	1092	3210	2012	1738	2304	438	2073	1989	2586	1409	2371	1166	1607	2075	1610	1762	2734	1083	1684	1671	1624	1685	2768	1100	1689	1641	7	0	0	0	0	0	0	1
Asia	JPN_77	2843	877	1087	3218	2016	1733	2304	438	2075	1985	2582	1405	2377	1166	1602	2073	1609	1758	2737	1083	1683	1676	1618	1689	2771	1096	1692	1642	7	0	0	0	0	0	0	1
Asia	JPN_8	2848	885	1094	3217	2020	1742	2307	439	2081	1991	2587	1415	2377	1166	1611	2081	1655	1806	2851	987	1873	1977	2051	1701	2946	1117	1749	1618	4	0	0	0	1	0	0	0
Asia	JPN_86	2882	885	1091	3232	2020	1738	2313	439	2077	1988	2588	1407	2384	1168	1609	2079	1626	1796	2721	1081	1740	2116	1909	1876	2775	1020	1657	1713	4	0	0	0	1	0	0	0
Asia	JPN_9	2850	887	1090	3223	2023	1740	2306	439	2078	1993	2589	1410	2378	1165	1610	2081	1617	1808	2800	1023	1709	1755	1626	1770	2861	998	1707	1659	7	0	0	0	0	0	0	1
Asia	JPN_90	2841	880	1090	3212	2013	1735	2304	438	2071	1988	2586	1405	2372	1166	1605	2073	1610	1760	2733	1085	1681	1672	1620	1684	2771	1098	1691	1640	7	0	0	0	0	0	0	1
Asia	JPN_94	2841	880	1088	3213	2015	1738	2301	437	2072	1987	2585	1404	2371	1167	1606	2076	1611	1761	2733	1084	1681	1672	1619	1685	2773	1098	1691	1641	7	0	0	0	0	0	0	1
Asia	KAZ_1	2882	889	1093	3216	2021	1741	2311	438	2080	1988	2587	1414	2378	1166	1612	2083	1444	1594	2510	892	1518	1552	1425	1590	2564	855	1508	1481	6	0	0	0	0	0	1	0
Asia	KWT_1	2876	884	1087	3209	2018	1739	2299	437	2075	1986	2587	1409	2367	1167	1609	2077	1685	1728	2759	1094	1788	1624	1710	1695	2768	1082	1830	1583	3	0	0	1	0	0	0	0
Asia	KWT_2	2881	887	1091	3218	2024	1741	2306	439	2080	1991	2590	1411	2376	1168	1611	2084	1658	1804	2851	988	1875	1976	2051	1703	2947	1118	1751	1618	7	0	0	0	0	0	0	1
Asia	KWT_3	2834	878	1077	3185	2000	1728	2284	434	2056	1964	2557	1395	2356	1162	1593	2066	1664	1662	2907	1053	1817	1859	2070	1648	2868	1180	1748	1626	2	0	1	0	0	0	0	0
Asia	LBN_11	2840	882	1091	3216	2018	1737	2305	438	2078	1989	2589	1409	2374	1168	1607	2079	1605	1775	2866	1067	1717	1642	1701	1674	2838	1111	1788	1613	2	0	1	0	0	0	0	0
Asia	LBN_12	2846	889	1091	3218	2021	1738	2308	438	2080	1988	2587	1413	2376	1166	1610	2081	1624	1730	2853	1096	1679	1783	1712	1808	2790	1014	1744	1671	2	0	1	0	0	0	0	0
Asia	LBN_2	2864	881	1086	3202	2011	1731	2297	434	2063	1979	2576	1400	2362	1161	1602	2075	1659	1723	2880	1016	1833	1826	2030	1710	2816	1097	1845	1629	2	0	1	0	0	0	0	0
Asia	LBN_3	1990	625	783	2286	1412	1194	1604	292	1473	1401	1856	979	1635	832	1110	1457	1162	1226	1967	720	1301	1366	1423	1201	1994	806	1173	1192	7	0	0	0	0	0	0	1
Asia	LBN_4	2842	882	1091	3216	2017	1737	2306	438	2078	1989	2589	1409	2374	1168	1607	2078	1624	1788	2861	1011	1803	1902	2027	1640	2887	1180	1742	1638	2	0	1	0	0	0	0	0
Asia	LBN_5	2872	883	1092	3212	2017	1737	2303	436	2076	1990	2590	1407	2372	1167	1606	2080	1598	1712	2907	1043	1858	1835	2044	1681	2878	1184	1783	1576	3	0	0	1	0	0	0	0
Asia	LBN_7	2778	856	1062	3130	1956	1692	2248	422	2024	1925	2515	1374	2309	1133	1571	2017	1623	1721	2710	1143	1637	1991	1807	1717	2801	983	1687	1566	3	0	0	1	0	0	0	0
Asia	LBN_8	2799	862	1078	3176	1974	1717	2271	430	2047	1957	2553	1382	2338	1160	1582	2041	1562	1706	2881	977	1781	1846	2034	1678	2769	1135	1727	1642	3	0	0	1	0	0	0	0
Asia	LBN_9	2871	882	1088	3213	2017	1736	2302	437	2072	1988	2587	1403	2371	1167	1605	2079	1680	1771	2843	1172	1692	2084	1876	1776	2969	993	1747	1597	3	0	0	1	0	0	0	0
Asia	LKA_10	2753	846	1042	3086	1940	1663	2207	422	1982	1891	2462	1342	2272	1111	1549	1987	1586	1637	2755	1033	1831	1767	1960	1646	2731	1098	1765	1488	2	0	1	0	0	0	0	0
Asia	LKA_11	2670	845	1047	3045	1939	1643	2187	425	1975	1890	2468	1329	2251	1113	1530	1977	1578	1627	2738	1036	1824	1746	1944	1648	2686	1094	1744	1464	3	0	0	1	0	0	0	0
Asia	LKA_12	2848	881	1086	3216	2017	1737	2305	435	2083	1986	2583	1413	2381	1164	1606	2073	1570	1721	2862	1036	1835	1816	2063	1637	2798	1246	1772	1590	2	0	1	0	0	0	0	0
Asia	LKA_13	2714	855	1063	3080	1958	1665	2205	431	2004	1917	2494	1349	2284	1126	1549	1994	1601	1646	2780	1047	1842	1766	1968	1667	2728	1110	1768	1477	2	0	1	0	0	0	0	0
Asia	LKA_14	2286	702	830	2591	1642	1377	1857	342	1695	1580	2075	1107	1926	947	1276	1654	1316	1351	2339	861	1543	1502	1627	1380	2310	954	1478	1237	2	0	1	0	0	0	0	0
Asia	LKA_15	1996	615	735	2253	1445	1210	1624	305	1452	1398	1816	958	1667	808	1133	1449	1148	1199	2044	759	1342	1311	1418	1218	2009	819	1326	1092	4	0	0	0	1	0	0	0
Asia	LKA_16	2536	777	942	2847	1795	1531	2030	388	1830	1746	2270	1236	2090	1036	1419	1840	1454	1497	2557	952	1707	1628	1807	1520	2516	1035	1639	1365	2	0	1	0	0	0	0	0
Asia	LKA_17	2437	755	916	2751	1764	1461	1959	388	1770	1687	2202	1191	2009	997	1380	1790	1427	1443	2468	946	1652	1582	1733	1481	2415	993	1599	1330	3	0	0	1	0	0	0	0
Asia	LKA_18	2673	839	1035	3015	1932	1635	2166	420	1958	1880	2445	1315	2236	1105	1520	1968	1564	1609	2720	1029	1803	1735	1925	1641	2678	1088	1743	1460	3	0	0	1	0	0	0	0
Asia	LKA_2	2822	882	1082	3193	2009	1720	2281	436	2060	1973	2560	1397	2354	1154	1591	2063	1635	1678	2856	1067	1901	1821	2034	1714	2817	1138	1823	1521	7	0	0	0	0	0	0	1
Asia	LKA_21	2619	801	962	2940	1851	1572	2092	406	1889	1799	2339	1281	2164	1053	1461	1888	1490	1548	2607	975	1755	1613	1780	1568	2576	1072	1654	1442	2	0	1	0	0	0	0	0
Asia	LKA_22	2819	875	1079	3195	2006	1721	2285	436	2066	1973	2564	1400	2358	1152	1596	2058	1645	1726	2783	1183	1699	2023	1844	1777	2871	1034	1706	1572	2	0	1	0	0	0	0	0
Asia	LKA_23	2882	888	1092	3218	2023	1741	2309	439	2081	1989	2587	1414	2378	1166	1612	2083	0	0	0	0	2	3	1	1	0	1	1	1	1	1	0	0	0	0	0	0
Asia	LKA_3	2673	838	1024	3014	1903	1629	2162	410	1936	1851	2416	1318	2214	1094	1510	1961	1548	1602	2698	1015	1799	1729	1910	1624	2673	1086	1723	1450	2	0	1	0	0	0	0	0
Asia	LKA_5	2846	882	1089	3209	2020	1737	2297	436	2080	1990	2584	1411	2374	1163	1606	2075	1588	1771	2934	1079	1812	1861	1987	1718	2896	1173	1801	1593	2	0	1	0	0	0	0	0
Asia	MNG_1	2846	888	1103	3206	2018	1750	2305	438	2067	1990	2585	1401	2380	1163	1622	2076	1619	1823	2780	1119	1807	1922	1849	1813	2863	1060	1788	1583	3	0	0	1	0	0	0	0
Asia	MNG_2	2857	889	1104	3208	2016	1758	2307	444	2064	1997	2588	1402	2382	1166	1628	2076	1488	1600	2611	1021	1606	1754	1674	1629	2678	926	1582	1432	3	0	0	1	0	0	0	0
Asia	MNG_3	2838	897	1095	3216	2036	1740	2302	445	2086	1989	2585	1419	2374	1168	1614	2090	1670	1784	2758	1063	1754	1713	1657	1759	2806	1043	1744	1625	3	0	0	1	0	0	0	0
Asia	MYS_1	2880	883	1091	3215	2019	1740	2308	439	2079	1987	2588	1412	2374	1168	1612	2081	1609	1777	2895	1199	1676	2031	1841	1864	2902	1048	1743	1656	2	0	1	0	0	0	0	0
Asia	MYS_14	2850	886	1090	3217	2020	1740	2308	438	2076	1992	2589	1409	2378	1166	1610	2080	1678	1674	2942	1055	1838	1880	2089	1671	2895	1177	1761	1641	3	0	0	1	0	0	0	0
Asia	MYS_17	2877	883	1091	3213	2017	1742	2306	439	2079	1988	2586	1412	2375	1166	1613	2077	1672	1767	2836	1134	1736	2054	1896	1837	2900	1013	1734	1665	3	0	0	1	0	0	0	0
Asia	MYS_19	2855	887	1096	3217	2024	1745	2310	441	2081	1990	2590	1412	2379	1170	1616	2084	1584	1837	2776	1084	1698	1713	1629	1793	2761	1097	1730	1691	7	0	0	0	0	0	0	1
Asia	MYS_2	2849	886	1093	3219	2020	1742	2307	440	2080	1989	2586	1413	2377	1168	1611	2081	1656	1805	2850	987	1873	1977	2051	1701	2946	1117	1749	1618	7	0	0	0	0	0	0	1
Asia	MYS_21	2848	886	1087	3223	2021	1740	2309	440	2075	1993	2589	1411	2377	1165	1611	2081	1621	1743	2862	1063	1844	1909	2101	1710	2795	1178	1823	1610	2	0	1	0	0	0	0	0
Asia	MYS_23	2840	882	1090	3209	2017	1737	2305	439	2078	1989	2588	1412	2372	1166	1609	2079	1650	1733	2826	1035	1734	1733	1759	1739	2786	1052	1741	1678	2	0	1	0	0	0	0	0
Asia	MYS_29	2858	886	1088	3225	2026	1741	2314	440	2078	1993	2593	1410	2381	1168	1613	2087	1569	1736	2840	1070	1719	1702	1682	1750	2813	1081	1706	1612	7	0	0	0	0	0	0	1
Asia	MYS_3	2848	885	1091	3217	2019	1741	2307	440	2079	1987	2586	1413	2375	1168	1612	2081	1599	1750	2975	1075	1835	1867	2020	1765	2889	1155	1823	1613	2	0	1	0	0	0	0	0
Asia	MYS_30	2842	882	1092	3217	2017	1738	2307	438	2078	1989	2589	1409	2376	1168	1608	2078	1622	1790	2863	1011	1803	1902	2026	1642	2889	1180	1743	1638	2	0	1	0	0	0	0	0
Asia	MYS_31	2854	885	1093	3224	2022	1743	2312	438	2085	1994	2593	1416	2381	1167	1613	2082	1642	1689	2890	1032	1871	1846	2088	1714	2784	1140	1819	1595	4	0	0	0	1	0	0	0
Asia	MYS_32	2851	895	1094	3216	2021	1745	2310	439	2084	1992	2591	1418	2378	1170	1612	2086	1666	1805	2816	1048	1730	1685	1665	1695	2862	1093	1734	1664	4	0	0	0	1	0	0	0
Asia	MYS_34	2842	880	1090	3210	2017	1737	2303	439	2078	1986	2585	1411	2371	1167	1608	2077	1622	1727	2873	984	1883	1828	2065	1666	2844	1187	1761	1616	3	0	0	1	0	0	0	0
Asia	MYS_35	2855	887	1094	3220	2023	1740	2308	438	2078	1990	2590	1410	2376	1168	1610	2085	1602	1737	2902	1178	1681	2008	1888	1853	2848	1022	1774	1622	6	0	0	0	0	0	1	0
Asia	MYS_37	2868	873	1079	3190	2001	1724	2290	433	2060	1970	2570	1396	2354	1157	1600	2061	1667	1737	2818	1138	1724	2027	1872	1823	2879	997	1725	1646	2	0	1	0	0	0	0	0
Asia	MYS_4	2866	877	1083	3206	2011	1722	2298	435	2073	1978	2578	1409	2360	1160	1598	2074	1580	1804	2870	1140	1743	2003	1847	1829	2947	1095	1701	1624	7	0	0	0	0	0	0	1
Asia	MYS_41	2846	888	1092	3213	2022	1740	2308	439	2080	1989	2589	1413	2376	1168	1611	2084	1693	1729	2761	1096	1793	1627	1713	1697	2773	1083	1827	1584	2	0	1	0	0	0	0	0
Asia	MYS_42	2877	885	1088	3213	2018	1739	2305	437	2078	1989	2589	1409	2373	1166	1611	2078	1602	1719	2902	1110	1699	1705	1764	1749	2796	1056	1839	1610	7	0	0	0	0	0	0	1
Asia	MYS_8	2844	887	1089	3212	2021	1740	2304	439	2077	1987	2586	1411	2371	1168	1610	2084	1609	1735	2876	1039	1853	1882	2090	1715	2806	1166	1818	1596	3	0	0	1	0	0	0	0
Asia	MYS_9	2841	882	1090	3206	2018	1737	2303	439	2078	1988	2586	1412	2371	1166	1608	2079	1613	1733	2884	1040	1846	1842	2027	1681	2858	1154	1803	1567	6	0	0	0	0	0	1	0
Asia	OMN_17	2847	884	1087	3216	2022	1738	2305	439	2080	1990	2588	1409	2378	1167	1607	2080	1654	1723	2865	1224	1650	2063	1826	1829	2914	1044	1670	1659	6	0	0	0	0	0	1	0
Asia	OMN_19	2845	883	1091	3216	2019	1736	2308	438	2079	1989	2589	1411	2377	1168	1606	2081	1653	1727	2865	1223	1649	2064	1826	1827	2914	1044	1670	1659	6	0	0	0	0	0	1	0
Asia	OMN_20	2847	884	1088	3218	2022	1738	2306	438	2080	1989	2589	1409	2376	1168	1608	2081	1610	1810	2911	1159	1619	2061	1823	1788	2971	1029	1706	1655	7	0	0	0	0	0	0	1
Asia	OMN_22	2847	884	1087	3217	2022	1738	2304	439	2079	1989	2587	1410	2375	1167	1608	2082	1629	1784	2843	1072	1724	1652	1647	1710	2855	1107	1749	1653	3	0	0	1	0	0	0	0
Asia	OMN_24	2849	884	1089	3217	2022	1739	2305	439	2080	1991	2591	1411	2374	1168	1610	2082	1615	1837	2789	1174	1725	2035	1797	1866	2882	1040	1733	1625	2	0	1	0	0	0	0	0
Asia	OMN_3	2847	886	1088	3216	2023	1740	2305	438	2079	1990	2589	1409	2376	1169	1609	2083	1654	1725	2864	1224	1649	2064	1827	1832	2916	1044	1670	1659	6	0	0	0	0	0	1	0
Asia	OMN_5	2851	883	1090	3221	2023	1744	2310	438	2081	1995	2592	1411	2383	1167	1611	2083	1672	1796	2859	1188	1676	2133	1858	1808	2989	1049	1659	1672	6	0	0	0	0	0	1	0
Asia	SAU_106	2879	887	1094	3221	2020	1742	2310	438	2079	1991	2590	1410	2380	1169	1610	2082	0	2	0	0	6	1	0	0	0	0	0	0	1	1	0	0	0	0	0	0
Asia	SAU_115	2852	888	1100	3219	2023	1743	2307	441	2081	1997	2593	1412	2380	1172	1609	2085	1700	1697	2892	1044	1828	1812	2003	1688	2831	1134	1783	1647	3	0	0	1	0	0	0	0
Asia	SAU_121	2843	882	1092	3214	2018	1739	2305	437	2077	1989	2590	1407	2375	1168	1609	2079	1623	1765	2817	1031	1715	1689	1722	1688	2803	1072	1753	1646	2	0	1	0	0	0	0	0
Asia	SAU_123	2880	886	1095	3217	2023	1740	2309	438	2080	1992	2591	1412	2378	1167	1610	2084	0	2	0	0	4	1	0	1	0	0	0	1	1	1	0	0	0	0	0	0
Asia	SAU_126	2858	880	1093	3192	2008	1729	2294	437	2063	1975	2576	1396	2360	1166	1601	2070	0	1	0	0	6	2	0	0	0	0	0	0	1	1	0	0	0	0	0	0
Asia	SAU_15	2880	886	1093	3215	2024	1743	2308	437	2082	1990	2588	1415	2377	1166	1612	2086	0	1	0	0	2	1	0	1	1	0	2	0	1	1	0	0	0	0	0	0
Asia	SAU_196	2880	887	1094	3219	2021	1741	2310	438	2080	1991	2590	1411	2380	1168	1610	2082	0	1	0	0	5	1	0	0	0	0	0	0	1	1	0	0	0	0	0	0
Asia	SAU_200	2882	887	1091	3221	2024	1741	2307	439	2079	1991	2590	1410	2377	1168	1611	2084	0	1	0	0	4	0	0	0	0	1	2	0	1	1	0	0	0	0	0	0
Asia	SAU_207	2880	885	1093	3220	2022	1741	2310	438	2080	1992	2590	1412	2380	1166	1611	2082	0	0	0	0	7	1	0	0	0	0	0	0	1	1	0	0	0	0	0	0
Asia	SAU_250	2880	887	1093	3219	2022	1741	2310	438	2080	1991	2589	1413	2379	1166	1611	2083	0	0	0	0	4	2	0	0	0	0	0	0	1	1	0	0	0	0	0	0
Asia	SAU_273	2878	887	1094	3218	2023	1741	2307	438	2080	1990	2589	1409	2379	1168	1610	2082	1530	1699	2774	1028	1685	1663	1641	1708	2772	1037	1669	1567	6	0	0	0	0	0	1	0
Asia	SAU_305	2881	888	1092	3217	2024	1741	2309	437	2081	1989	2589	1414	2376	1166	1612	2086	1	0	0	0	2	1	0	1	0	0	3	0	1	1	0	0	0	0	0	0
Asia	SAU_322	2880	887	1093	3218	2022	1741	2310	438	2080	1990	2590	1412	2378	1168	1611	2084	0	0	0	0	4	1	0	1	0	0	0	0	1	1	0	0	0	0	0	0
Asia	SAU_335	2880	887	1093	3221	2020	1741	2312	437	2079	1990	2591	1410	2380	1168	1611	2082	0	0	0	0	7	1	0	0	0	0	0	0	1	1	0	0	0	0	0	0
Asia	SAU_349	2885	886	1090	3219	2024	1740	2308	439	2080	1990	2590	1411	2377	1168	1611	2084	0	0	0	0	3	0	0	0	0	1	3	1	1	1	0	0	0	0	0	0
Asia	SAU_360	2849	887	1091	3212	2024	1739	2309	436	2083	1988	2590	1415	2376	1166	1611	2086	1697	1718	2854	1042	1843	1896	2077	1674	2842	1151	1795	1636	2	0	1	0	0	0	0	0
Asia	SAU_378	2845	887	1092	3218	2020	1738	2306	438	2079	1990	2589	1410	2376	1168	1607	2082	1640	1722	2883	1236	1678	2063	1838	1826	2953	1022	1712	1577	3	0	0	1	0	0	0	0
Asia	SAU_381	2816	898	1129	3215	2013	1740	2298	433	2094	2005	2605	1433	2359	1172	1602	2090	1648	1803	2850	1162	1730	2035	1863	1837	2897	1030	1718	1599	5	0	0	0	0	1	0	0
Asia	SAU_385	2846	886	1093	3219	2020	1740	2306	438	2077	1990	2589	1408	2376	1168	1609	2082	1651	1801	2902	1041	1710	1697	1703	1747	2855	1053	1793	1706	2	0	1	0	0	0	0	0
Asia	SAU_71	2880	886	1094	3219	2017	1739	2310	438	2078	1989	2589	1409	2378	1167	1610	2078	0	1	0	0	8	2	0	0	0	0	0	0	1	1	0	0	0	0	0	0
Asia	SGP_104	2806	873	1078	3167	1992	1706	2286	433	2048	1955	2549	1398	2342	1149	1586	2056	0	0	0	0	0	0	0	0	0	0	0	0	2	0	1	0	0	0	0	0
Asia	SGP_130	2839	880	1092	3207	2017	1736	2300	438	2074	1987	2586	1406	2369	1167	1606	2077	1612	1761	2731	1084	1680	1672	1622	1687	2770	1098	1690	1641	7	0	0	0	0	0	0	1
Asia	SGP_141	2841	879	1087	3206	2016	1735	2303	435	2074	1987	2587	1406	2372	1166	1604	2077	1610	1760	2733	1083	1681	1673	1618	1687	2772	1097	1691	1641	7	0	0	0	0	0	0	1
Asia	SGP_156	2846	879	1089	3208	2015	1736	2303	438	2073	1988	2583	1408	2373	1162	1607	2073	1610	1761	2731	1083	1682	1671	1620	1684	2772	1099	1693	1642	7	0	0	0	0	0	0	1
Asia	SGP_162	2842	878	1089	3209	2012	1735	2307	438	2073	1986	2586	1408	2372	1165	1608	2073	1611	1760	2733	1084	1680	1673	1621	1683	2771	1097	1692	1642	7	0	0	0	0	0	0	1
Asia	SGP_169	2839	879	1088	3212	2016	1736	2305	438	2072	1986	2584	1404	2375	1166	1606	2075	1610	1760	2733	1084	1680	1676	1619	1688	2771	1095	1691	1642	7	0	0	0	0	0	0	1
Asia	SGP_194	2842	878	1090	3208	2014	1737	2303	437	2074	1987	2585	1409	2370	1164	1608	2075	1611	1761	2731	1084	1680	1672	1621	1683	2771	1099	1691	1642	7	0	0	0	0	0	0	1
Asia	SGP_2	2842	878	1090	3208	2015	1737	2302	436	2076	1986	2586	1407	2371	1165	1608	2074	1610	1761	2732	1084	1680	1672	1621	1684	2771	1099	1691	1642	7	0	0	0	0	0	0	1
Asia	SGP_201	2837	880	1091	3206	2016	1737	2304	438	2074	1985	2582	1411	2370	1164	1608	2078	1612	1759	2732	1085	1679	1671	1620	1686	2771	1099	1691	1640	7	0	0	0	0	0	0	1
Asia	SGP_211	2816	872	1077	3177	2001	1717	2276	432	2062	1969	2566	1394	2347	1159	1587	2059	1597	1739	2707	1076	1668	1659	1606	1672	2745	1091	1676	1629	2	0	1	0	0	0	0	0
Asia	SGP_22	2839	882	1090	3203	2017	1737	2301	438	2074	1986	2585	1407	2369	1167	1607	2078	0	0	0	0	0	0	0	0	0	0	0	0	7	0	0	0	0	0	0	1
Asia	SGP_239	2815	871	1081	3189	1999	1724	2286	436	2054	1975	2567	1392	2355	1158	1595	2059	1598	1754	2708	1070	1674	1659	1610	1667	2748	1093	1676	1627	2	0	1	0	0	0	0	0
Asia	SGP_276	2842	877	1089	3208	2012	1735	2307	438	2072	1986	2585	1408	2372	1165	1607	2073	1611	1760	2733	1084	1680	1672	1621	1682	2771	1097	1692	1642	2	0	1	0	0	0	0	0
Asia	SGP_302	2842	879	1090	3209	2013	1737	2303	436	2074	1987	2587	1407	2370	1165	1608	2074	1611	1761	2731	1085	1681	1672	1621	1683	2771	1099	1691	1641	7	0	0	0	0	0	0	1
Asia	SGP_31	2841	879	1090	3207	2016	1737	2302	438	2075	1985	2584	1408	2370	1165	1609	2075	1611	1761	2731	1085	1679	1672	1621	1685	2771	1099	1692	1641	7	0	0	0	0	0	0	1
Asia	SGP_410	2839	879	1091	3206	2017	1736	2301	437	2074	1987	2584	1406	2371	1166	1605	2078	1611	1761	2730	1082	1681	1672	1621	1687	2771	1098	1690	1642	2	0	1	0	0	0	0	0
Asia	SGP_90	2842	879	1091	3210	2014	1737	2302	436	2075	1985	2585	1407	2370	1166	1607	2075	1611	1761	2731	1084	1680	1675	1622	1686	2770	1097	1691	1642	7	0	0	0	0	0	0	1
Asia	South Korea_1	2843	885	1091	3214	2020	1737	2304	437	2080	1990	2587	1410	2376	1166	1605	2080	1670	1739	2849	1060	1736	1718	1676	1765	2853	1006	1753	1647	2	0	1	0	0	0	0	0
Asia	South Korea_3	2862	887	1091	3218	2021	1741	2307	439	2079	1987	2587	1413	2374	1168	1612	2084	1601	1751	2974	1075	1835	1867	2019	1764	2895	1156	1827	1614	6	0	0	0	0	0	1	0
Asia	South Korea_7	2859	888	1090	3215	2020	1741	2306	439	2075	1984	2583	1411	2373	1167	1612	2083	1599	1749	2970	1074	1834	1866	2018	1763	2893	1156	1827	1612	2	0	1	0	0	0	0	0
Asia	South Korea_8	2859	887	1089	3216	2020	1741	2305	438	2075	1985	2584	1410	2372	1167	1612	2083	1598	1749	2971	1074	1834	1866	2018	1763	2892	1156	1827	1612	6	0	0	0	0	0	1	0
Asia	TUR_1	2841	883	1091	3210	2013	1736	2308	438	2080	1983	2586	1411	2375	1168	1608	2074	1639	1768	2829	1175	1699	2036	1820	1816	2914	1051	1678	1640	2	0	1	0	0	0	0	0
Asia	TUR_12	2831	873	1082	3198	2013	1723	2285	437	2065	1971	2570	1395	2356	1161	1598	2068	1577	1765	2784	1129	1707	2068	1851	1844	2869	994	1675	1586	2	0	1	0	0	0	0	0
Asia	TUR_14	2840	882	1092	3211	2018	1735	2304	437	2077	1989	2591	1409	2370	1168	1605	2082	1643	1768	2826	1178	1699	2036	1821	1816	2915	1051	1678	1639	7	0	0	0	0	0	0	1
Asia	TUR_16	2841	881	1091	3217	2017	1734	2308	438	2076	1987	2588	1408	2374	1167	1606	2079	1642	1768	2828	1177	1699	2039	1819	1815	2916	1049	1678	1640	7	0	0	0	0	0	0	1
Asia	TUR_17	2592	791	965	2896	1825	1562	2083	398	1899	1774	2314	1287	2149	1054	1447	1877	1440	1581	2635	1040	1505	1724	1598	1650	2570	943	1597	1471	2	0	1	0	0	0	0	0
Asia	TUR_24	2878	883	1089	3219	2025	1743	2308	438	2079	1998	2590	1411	2383	1165	1609	2084	1636	1729	2776	1073	1806	1937	1875	1801	2833	1071	1671	1637	4	0	0	0	1	0	0	0
Asia	TUR_32	2882	883	1083	3214	2023	1744	2317	430	2080	1984	2584	1410	2385	1163	1612	2086	2	1	3	0	14	5	2	4	8	4	11	6	2	0	1	0	0	0	0	0
Asia	TUR_35	2833	876	1083	3190	2012	1729	2288	438	2066	1976	2572	1399	2358	1163	1600	2071	1636	1765	2804	1170	1695	2026	1808	1808	2903	1045	1672	1629	7	0	0	0	0	0	0	1
Asia	TUR_47	2799	863	1064	3156	1979	1702	2258	421	2033	1942	2527	1377	2327	1142	1574	2043	1612	1765	2844	1102	1666	1877	1778	1702	2905	1033	1746	1561	2	0	1	0	0	0	0	0
Asia	TUR_48	2834	876	1087	3194	2008	1729	2293	436	2064	1979	2578	1398	2362	1161	1602	2066	1636	1760	2811	1172	1690	2033	1818	1800	2904	1043	1673	1628	7	0	0	0	0	0	0	1
Asia	TUR_5	2843	882	1091	3213	2018	1734	2306	438	2076	1989	2589	1408	2374	1165	1606	2078	1641	1768	2827	1177	1699	2036	1820	1814	2916	1051	1679	1640	7	0	0	0	0	0	0	1
Asia	TUR_53	2840	881	1084	3204	2015	1730	2298	437	2076	1986	2587	1404	2367	1164	1604	2072	1636	1764	2818	1173	1696	2036	1816	1815	2907	1049	1674	1639	7	0	0	0	0	0	0	1
Asia	TUR_61	2789	867	1080	3141	1971	1689	2259	430	2041	1948	2542	1392	2319	1145	1568	2037	1644	1702	2767	1111	1735	2009	1880	1788	2820	1016	1666	1591	3	0	0	1	0	0	0	0
Asia	TUR_69	2841	883	1092	3223	2021	1735	2302	439	2076	1987	2586	1403	2375	1166	1607	2076	1641	1768	2829	1177	1700	2039	1820	1817	2915	1049	1678	1640	7	0	0	0	0	0	0	1
Asia	TUR_7	2878	884	1089	3216	2020	1740	2304	439	2077	1991	2590	1408	2375	1167	1612	2078	1680	1680	2939	1063	1833	1881	2089	1658	2900	1190	1763	1638	6	0	0	0	0	0	1	0
Asia	TUR_79	2843	888	1089	3210	2017	1735	2305	438	2074	1987	2587	1410	2369	1164	1608	2080	1683	1757	2832	1141	1746	2049	1888	1844	2888	1010	1729	1654	2	0	1	0	0	0	0	0
Asia	TWN_10	2876	889	1093	3217	2023	1741	2306	438	2082	1989	2591	1414	2374	1169	1611	2086	1712	1657	2777	1020	1883	1912	2115	1739	2715	1085	1795	1630	3	0	0	1	0	0	0	0
Asia	TWN_12	2849	893	1095	3214	2022	1746	2308	438	2083	1992	2591	1413	2379	1169	1613	2083	1662	1812	2854	989	1873	1977	2051	1703	2947	1120	1748	1618	6	0	0	0	0	0	1	0
Asia	TWN_18	2855	889	1095	3217	2024	1744	2310	439	2083	1993	2592	1415	2378	1168	1614	2086	1656	1764	2868	1005	1772	1681	1720	1738	2854	1061	1740	1673	3	0	0	1	0	0	0	0
Asia	TWN_23	2859	889	1094	3217	2025	1743	2311	438	2083	1992	2592	1414	2379	1167	1614	2085	1608	1744	2910	1178	1681	2008	1887	1855	2848	1021	1776	1622	2	0	1	0	0	0	0	0
Asia	TWN_3	2850	887	1094	3218	2022	1741	2308	440	2082	1990	2588	1412	2380	1167	1612	2078	0	1	0	0	5	1	0	2	0	0	0	1	1	1	0	0	0	0	0	0
Asia	TWN_4	2848	888	1091	3221	2021	1743	2309	440	2076	1992	2587	1412	2378	1166	1612	2082	1535	1713	2669	940	1611	1655	1529	1667	2735	911	1617	1566	6	0	0	0	0	0	1	0
Asia	TWN_9	2848	886	1094	3219	2022	1741	2309	437	2081	1990	2591	1412	2377	1168	1611	2083	0	2	0	0	5	0	0	0	0	1	1	0	1	1	0	0	0	0	0	0
Asia	VNM_1	2875	887	1095	3219	2022	1741	2308	438	2080	1991	2591	1411	2377	1168	1611	2083	2021	1740	2307	439	2081	1988	2590	1410	2372	1168	1611	2083	2	0	1	0	0	0	0	0
Asia	VNM_15	2844	886	1093	3217	2021	1740	2304	437	2080	1989	2590	1410	2374	1168	1609	2082	1599	1751	2975	1076	1835	1866	2018	1764	2888	1156	1821	1612	6	0	0	0	0	0	1	0
Asia	VNM_2	2850	885	1091	3213	2021	1740	2306	437	2079	1986	2587	1412	2373	1168	1610	2085	1629	1730	2886	1044	1836	1848	2025	1676	2868	1149	1805	1577	7	0	0	0	0	0	0	1
Asia	VNM_22	2840	882	1090	3217	2018	1738	2305	438	2078	1989	2588	1409	2374	1168	1607	2079	1683	1752	2836	1146	1739	2043	1888	1836	2881	1012	1730	1653	2	0	1	0	0	0	0	0
Asia	VNM_29	2845	882	1092	3215	2020	1738	2303	439	2079	1990	2589	1410	2373	1168	1608	2080	1561	1762	2947	1024	1853	1834	2038	1728	2862	1193	1795	1610	2	0	1	0	0	0	0	0
Asia	VNM_30	2791	864	1075	3172	1985	1695	2269	427	2042	1967	2557	1385	2337	1140	1572	2041	1591	1676	2793	1061	1681	1686	1684	1704	2773	1050	1684	1605	2	0	1	0	0	0	0	0
Asia	VNM_34	2842	883	1088	3210	2019	1736	2302	439	2077	1988	2588	1409	2370	1167	1607	2080	1640	1761	2784	1148	1707	2095	1900	1828	2850	1003	1711	1621	2	0	1	0	0	0	0	0
Asia	VNM_4	2843	882	1089	3215	2019	1739	2304	439	2079	1989	2589	1410	2373	1168	1609	2080	1652	1732	2828	1035	1733	1733	1761	1738	2787	1052	1742	1678	2	0	1	0	0	0	0	0
Asia	VNM_6	2847	887	1090	3218	2024	1739	2305	439	2080	1990	2588	1411	2376	1168	1608	2084	1682	1680	2939	1061	1833	1882	2090	1664	2897	1190	1761	1642	6	0	0	0	0	0	1	0
Europe	AUT_9	2837	883	1086	3203	2018	1731	2295	437	2069	1982	2577	1405	2364	1159	1605	2073	1617	1779	2853	1005	1798	1887	2023	1634	2876	1183	1739	1636	2	0	1	0	0	0	0	0
Europe	BEL_1	2847	883	1086	3215	2020	1738	2306	439	2078	1989	2589	1409	2374	1168	1609	2080	1625	1785	2845	1072	1724	1650	1647	1710	2855	1108	1750	1652	7	0	0	0	0	0	0	1
Europe	BEL_5	2813	871	1083	3187	2001	1723	2287	436	2051	1976	2568	1392	2354	1160	1591	2064	1638	1723	2805	1183	1677	2023	1840	1806	2843	1000	1716	1597	2	0	1	0	0	0	0	0
Europe	BIH_3	2848	886	1091	3202	2020	1734	2305	437	2068	1987	2583	1406	2371	1166	1601	2087	1646	1761	2818	1107	1709	1749	1691	1761	2830	1036	1777	1630	2	0	1	0	0	0	0	0
Europe	CHE_1	2843	884	1092	3215	2019	1739	2306	438	2079	1989	2589	1410	2375	1168	1609	2080	1585	1818	2880	1149	1751	2008	1855	1833	2944	1103	1709	1628	6	0	0	0	0	0	1	0
Europe	CYP_1	2852	887	1095	3222	2022	1740	2308	439	2078	1991	2590	1410	2378	1167	1611	2082	2083	1612	2378	1168	1413	2590	1990	2077	2307	438	1741	2023	3	0	0	1	0	0	0	0
Europe	CZE_1	2833	877	1089	3200	2016	1732	2295	439	2073	1982	2580	1408	2362	1165	1604	2077	1630	1783	2805	1138	1713	2033	1897	1845	2816	1017	1756	1644	7	0	0	0	0	0	0	1
Europe	CZE_17	2834	876	1089	3213	2016	1728	2297	435	2071	1986	2585	1402	2367	1162	1600	2074	1651	1735	2815	1185	1694	2042	1854	1822	2865	1004	1721	1611	7	0	0	0	0	0	0	1
Europe	CZE_18	2836	874	1086	3205	2016	1729	2299	438	2073	1982	2581	1407	2366	1165	1601	2077	1650	1735	2816	1186	1689	2042	1853	1824	2868	1005	1723	1611	7	0	0	0	0	0	0	1
Europe	CZE_19	2833	878	1087	3206	2016	1733	2295	434	2072	1983	2586	1403	2361	1165	1605	2078	1650	1737	2815	1186	1689	2040	1855	1823	2867	1005	1723	1610	7	0	0	0	0	0	0	1
Europe	CZE_2	2836	877	1085	3204	2018	1729	2297	437	2073	1982	2583	1405	2364	1165	1602	2078	1651	1733	2816	1187	1688	2039	1853	1823	2868	1007	1723	1610	7	0	0	0	0	0	0	1
Europe	CZE_24	2839	879	1091	3210	2017	1736	2301	437	2073	1986	2585	1405	2370	1167	1605	2078	1652	1735	2822	1189	1691	2046	1857	1826	2869	1006	1726	1614	7	0	0	0	0	0	0	1
Europe	CZE_25	2835	881	1089	3207	2014	1731	2298	434	2069	1979	2582	1401	2362	1165	1603	2077	1619	1728	2828	1191	1664	2033	1845	1851	2833	1032	1689	1653	7	0	0	0	0	0	0	1
Europe	CZE_3	2835	874	1084	3211	2013	1734	2299	437	2069	1982	2582	1405	2363	1164	1607	2076	1650	1737	2814	1184	1692	2041	1853	1821	2869	1003	1723	1611	2	0	1	0	0	0	0	0
Europe	CZE_31	2833	876	1088	3206	2016	1733	2298	437	2070	1982	2579	1406	2365	1164	1603	2079	1650	1733	2817	1187	1690	2039	1855	1825	2867	1006	1723	1611	7	0	0	0	0	0	0	1
Europe	CZE_35	2833	877	1091	3207	2014	1732	2297	437	2070	1983	2583	1403	2364	1165	1604	2075	1649	1737	2816	1188	1689	2040	1856	1823	2866	1005	1723	1610	7	0	0	0	0	0	0	1
Europe	CZE_38	2835	877	1087	3209	2017	1729	2298	438	2071	1981	2581	1404	2365	1164	1603	2076	1651	1736	2814	1186	1689	2040	1851	1822	2868	1005	1723	1610	7	0	0	0	0	0	0	1
Europe	CZE_41	2832	875	1088	3206	2013	1733	2299	439	2072	1982	2581	1404	2368	1166	1605	2072	1648	1735	2819	1189	1687	2040	1856	1820	2868	1006	1723	1609	7	0	0	0	0	0	0	1
Europe	CZE_49	2832	873	1088	3211	2016	1733	2294	435	2073	1982	2583	1403	2363	1166	1604	2077	1649	1736	2815	1188	1689	2041	1855	1822	2865	1005	1723	1610	7	0	0	0	0	0	0	1
Europe	CZE_5	2839	878	1091	3210	2016	1736	2302	436	2073	1986	2586	1405	2370	1167	1605	2077	1652	1735	2822	1189	1691	2046	1857	1825	2869	1005	1726	1614	2	0	1	0	0	0	0	0
Europe	CZE_50	2832	876	1090	3208	2016	1732	2296	437	2072	1986	2580	1405	2369	1161	1602	2073	1651	1736	2814	1188	1689	2041	1853	1820	2866	1005	1722	1610	2	0	1	0	0	0	0	0
Europe	CZE_56	2815	874	1086	3192	2008	1725	2288	431	2054	1973	2570	1395	2350	1155	1596	2068	1602	1761	2780	1003	1758	1655	1715	1701	2778	1086	1731	1634	7	0	0	0	0	0	0	1
Europe	CZE_64	2836	876	1088	3208	2017	1732	2296	437	2072	1982	2579	1405	2366	1162	1604	2075	1649	1735	2817	1187	1688	2040	1853	1823	2868	1004	1725	1610	2	0	1	0	0	0	0	0
Europe	CZE_69	2835	877	1088	3203	2014	1732	2294	436	2070	1983	2582	1403	2361	1165	1604	2076	1649	1736	2814	1188	1688	2039	1854	1823	2868	1005	1723	1610	7	0	0	0	0	0	0	1
Europe	CZE_73	2835	877	1085	3206	2018	1729	2297	437	2072	1982	2584	1404	2363	1165	1603	2078	1651	1734	2816	1187	1688	2040	1853	1823	2868	1006	1723	1610	7	0	0	0	0	0	0	1
Europe	CZE_82	2834	880	1087	3206	2016	1729	2297	435	2069	1981	2583	1403	2361	1164	1603	2079	1619	1727	2829	1191	1665	2031	1844	1853	2832	1033	1690	1653	7	0	0	0	0	0	0	1
Europe	CZE_85	2832	877	1089	3208	2012	1732	2298	438	2071	1983	2583	1403	2366	1167	1603	2073	1649	1734	2818	1189	1688	2039	1857	1821	2864	1006	1723	1609	7	0	0	0	0	0	0	1
Europe	CZE_9	2836	878	1091	3212	2015	1735	2301	437	2071	1986	2585	1405	2369	1167	1605	2078	1625	1800	2810	1136	1713	2049	1898	1842	2823	1027	1752	1657	7	0	0	0	0	0	0	1
Europe	ESP_1	2839	880	1091	3215	2016	1736	2303	436	2076	1987	2588	1409	2370	1164	1608	2077	1680	1749	2836	1145	1737	2041	1887	1833	2880	1010	1729	1652	2	0	1	0	0	0	0	0
Europe	ESP_10	2851	883	1094	3215	2021	1741	2306	438	2080	1989	2591	1411	2374	1169	1612	2083	1650	1804	2903	1041	1709	1695	1704	1746	2859	1055	1794	1708	2	0	1	0	0	0	0	0
Europe	ESP_101	2844	887	1093	3210	2023	1741	2309	440	2082	1991	2588	1416	2378	1167	1610	2084	2085	1611	2377	1168	1414	2588	1990	2082	2308	439	1742	2022	1	1	0	0	0	0	0	0
Europe	ESP_103	2816	876	1083	3191	2006	1727	2289	436	2056	1979	2570	1398	2355	1158	1596	2070	1608	1727	2889	973	1841	1809	2031	1727	2773	1167	1750	1695	7	0	0	0	0	0	0	1
Europe	ESP_108	2880	888	1092	3218	2023	1742	2308	440	2081	1989	2586	1415	2377	1167	1612	2084	2084	1612	2377	1168	1413	2588	1987	2081	2308	440	1742	2023	1	1	0	0	0	0	0	0
Europe	ESP_11	2872	884	1093	3220	2020	1738	2307	439	2077	1988	2587	1410	2375	1168	1608	2082	1586	1817	2880	1150	1752	2009	1854	1834	2955	1102	1716	1630	6	0	0	0	0	0	1	0
Europe	ESP_113	2751	859	1060	3127	1973	1690	2239	428	2022	1936	2513	1375	2308	1131	1562	2028	1584	1741	2782	987	1753	1849	1962	1608	2811	1139	1700	1595	2	0	1	0	0	0	0	0
Europe	ESP_116	2846	885	1094	3215	2021	1738	2303	438	2077	1990	2588	1410	2373	1167	1607	2082	0	2	0	0	4	0	0	0	0	0	0	0	7	0	0	0	0	0	0	1
Europe	ESP_12	2861	889	1095	3214	2024	1742	2306	436	2081	1992	2591	1411	2377	1167	1610	2085	2085	1611	2376	1168	1412	2590	1991	2080	2308	437	1742	2023	1	1	0	0	0	0	0	0
Europe	ESP_134	2818	876	1084	3194	2004	1727	2291	436	2057	1979	2571	1398	2358	1160	1595	2070	1608	1728	2891	971	1844	1811	2033	1728	2774	1166	1750	1697	7	0	0	0	0	0	0	1
Europe	ESP_136	2851	885	1094	3215	2021	1740	2306	438	2080	1989	2591	1410	2374	1168	1612	2082	1612	1814	2910	1160	1619	2061	1827	1790	2975	1028	1708	1657	2	0	1	0	0	0	0	0
Europe	ESP_141	2827	871	1083	3202	2007	1720	2290	430	2068	1976	2577	1403	2356	1156	1594	2068	1678	1628	2867	1085	1663	1669	1742	1630	2817	1040	1747	1609	7	0	0	0	0	0	0	1
Europe	ESP_142	2815	868	1080	3164	1994	1718	2265	434	2052	1970	2563	1391	2342	1150	1593	2045	1594	1787	2752	1013	1690	1732	1608	1746	2819	986	1682	1627	2	0	1	0	0	0	0	0
Europe	ESP_147	2852	887	1095	3220	2023	1739	2307	438	2080	1991	2592	1411	2376	1167	1611	2083	2023	1741	2308	439	2083	1991	2590	1411	2376	1167	1611	2083	7	0	0	0	0	0	0	1
Europe	ESP_16	2817	876	1086	3196	2005	1725	2290	436	2057	1979	2575	1395	2355	1161	1596	2068	1608	1730	2892	973	1843	1810	2032	1726	2773	1167	1750	1696	7	0	0	0	0	0	0	1
Europe	ESP_17	2845	883	1092	3217	2020	1737	2305	438	2080	1989	2590	1410	2373	1168	1608	2080	1625	1788	2845	1072	1726	1650	1647	1710	2855	1108	1748	1652	7	0	0	0	0	0	0	1
Europe	ESP_2	2881	887	1095	3219	2023	1741	2307	438	2080	1991	2590	1411	2377	1168	1610	2084	2084	1611	2377	1168	1413	2590	1991	2079	2307	438	1741	2023	1	1	0	0	0	0	0	0
Europe	ESP_20	2880	885	1094	3220	2021	1742	2308	439	2079	1993	2590	1413	2377	1167	1611	2083	2084	1612	2377	1169	1414	2590	1991	2077	2307	438	1742	2022	1	1	0	0	0	0	0	0
Europe	ESP_21	2841	879	1091	3207	2023	1734	2296	440	2075	1987	2580	1413	2365	1162	1604	2083	2083	1605	2365	1163	1413	2580	1986	2074	2297	440	1734	2022	1	1	0	0	0	0	0	0
Europe	ESP_24	2778	871	1076	3166	1997	1713	2271	434	2046	1965	2553	1386	2343	1152	1582	2055	1597	1768	2823	1002	1777	1874	1988	1626	2844	1160	1720	1612	2	0	1	0	0	0	0	0
Europe	ESP_25	2822	871	1083	3167	2001	1730	2287	434	2049	1980	2567	1398	2351	1153	1599	2068	1608	1735	2883	968	1836	1807	2028	1718	2767	1163	1757	1694	7	0	0	0	0	0	0	1
Europe	ESP_26	2820	875	1086	3195	2003	1721	2285	429	2053	1970	2569	1394	2347	1155	1594	2069	1628	1704	2773	1062	1713	1687	1718	1685	2768	1085	1707	1632	2	0	1	0	0	0	0	0
Europe	ESP_3	2842	880	1089	3212	2023	1733	2297	439	2074	1987	2581	1409	2368	1162	1603	2081	2081	1605	2368	1163	1412	2582	1986	2073	2297	439	1736	2022	1	1	0	0	0	0	0	0
Europe	ESP_30	2883	884	1091	3224	2022	1741	2309	438	2081	1990	2590	1409	2381	1168	1611	2080	2080	1612	2380	1168	1414	2591	1990	2078	2307	438	1744	2023	1	1	0	0	0	0	0	0
Europe	ESP_33	2799	866	1079	3159	1991	1719	2277	433	2031	1972	2558	1385	2338	1148	1590	2059	1596	1725	2874	966	1826	1795	2018	1709	2750	1157	1745	1683	7	0	0	0	0	0	0	1
Europe	ESP_34	2880	886	1094	3222	2021	1740	2311	437	2080	1990	2591	1412	2378	1166	1612	2082	2082	1613	2378	1168	1414	2590	1988	2078	2307	438	1742	2023	1	1	0	0	0	0	0	0
Europe	ESP_35	2816	876	1086	3196	2005	1726	2290	436	2057	1979	2576	1395	2355	1161	1597	2068	1608	1730	2892	974	1843	1810	2033	1726	2773	1167	1750	1695	7	0	0	0	0	0	0	1
Europe	ESP_37	2878	888	1094	3215	2022	1742	2305	439	2081	1990	2586	1413	2377	1168	1609	2083	1618	1796	2722	1095	1697	2137	1889	1873	2797	989	1656	1689	6	0	0	0	0	0	1	0
Europe	ESP_4	2880	887	1094	3225	2019	1741	2311	437	2078	1992	2592	1408	2381	1167	1611	2079	2079	1612	2382	1168	1414	2592	1991	2078	2307	437	1741	2023	1	1	0	0	0	0	0	0
Europe	ESP_41	2879	888	1093	3218	2022	1744	2309	439	2078	1989	2586	1414	2376	1168	1612	2087	2085	1612	2376	1168	1412	2586	1988	2079	2307	439	1744	2023	1	1	0	0	0	0	0	0
Europe	ESP_48	2832	876	1086	3203	2012	1723	2294	433	2071	1981	2579	1407	2361	1159	1594	2074	1665	1731	2836	1053	1728	1710	1672	1757	2841	998	1743	1644	2	0	1	0	0	0	0	0
Europe	ESP_49	2848	876	1084	3194	2001	1717	2282	425	2054	1966	2568	1394	2342	1153	1591	2069	1681	1741	2764	1038	1710	1669	1693	1665	2783	1050	1764	1660	2	0	1	0	0	0	0	0
Europe	ESP_5	2848	876	1083	3194	2004	1726	2290	437	2059	1978	2574	1399	2355	1161	1597	2068	1589	1766	2855	1058	1705	1626	1688	1666	2830	1105	1781	1611	2	0	1	0	0	0	0	0
Europe	ESP_50	2844	886	1090	3209	2019	1738	2306	438	2078	1989	2585	1413	2376	1166	1606	2081	526	487	746	320	557	528	540	508	779	334	488	491	7	0	0	0	0	0	0	1
Europe	ESP_52	2848	875	1083	3192	2002	1726	2293	436	2057	1980	2574	1399	2357	1160	1595	2068	1641	1760	2767	1160	1739	1995	1840	1759	2900	1039	1727	1556	2	0	1	0	0	0	0	0
Europe	ESP_55	2846	885	1092	3209	2022	1739	2303	440	2079	1988	2584	1412	2374	1168	1607	2082	2083	1607	2374	1167	1411	2584	1989	2079	2303	440	1740	2022	1	1	0	0	0	0	0	0
Europe	ESP_57	2847	888	1090	3211	2021	1739	2305	438	2080	1990	2587	1414	2375	1166	1607	2083	0	0	0	0	1	4	0	1	1	0	0	0	7	0	0	0	0	0	0	1
Europe	ESP_6	2817	875	1086	3199	2006	1725	2291	437	2059	1979	2575	1396	2357	1161	1597	2066	1610	1782	2849	1007	1791	1889	2009	1632	2869	1171	1731	1625	3	0	0	1	0	0	0	0
Europe	ESP_61	2816	875	1085	3196	2004	1725	2292	437	2054	1979	2572	1396	2355	1160	1595	2069	1609	1728	2891	972	1843	1811	2032	1726	2772	1165	1751	1695	7	0	0	0	0	0	0	1
Europe	ESP_65	2846	889	1093	3210	2018	1740	2305	438	2080	1992	2590	1412	2375	1170	1605	2083	2084	1610	2373	1168	1412	2590	1992	2081	2303	437	1740	2020	7	0	0	0	0	0	0	1
Europe	ESP_68	2882	887	1090	3226	2022	1741	2309	439	2078	1991	2589	1408	2381	1168	1610	2081	2081	1611	2381	1168	1413	2590	1990	2077	2307	439	1744	2023	1	1	0	0	0	0	0	0
Europe	ESP_69	2875	886	1096	3217	2018	1741	2317	439	2079	1987	2588	1413	2382	1170	1611	2083	2082	1612	2381	1169	1415	2590	1988	2081	2311	437	1741	2021	1	1	0	0	0	0	0	0
Europe	ESP_7	2880	889	1092	3217	2023	1742	2310	439	2078	1989	2589	1411	2377	1168	1613	2085	2085	1612	2376	1168	1413	2589	1989	2079	2310	439	1742	2023	1	1	0	0	0	0	0	0
Europe	ESP_70	2880	886	1092	3222	2021	1742	2309	437	2080	1991	2592	1411	2377	1167	1613	2082	2082	1613	2378	1168	1414	2592	1990	2079	2307	437	1742	2023	1	1	0	0	0	0	0	0
Europe	ESP_72	2818	876	1084	3197	2006	1726	2292	437	2058	1978	2572	1400	2355	1160	1597	2070	1610	1780	2849	1007	1790	1886	2008	1631	2870	1175	1731	1625	3	0	0	1	0	0	0	0
Europe	ESP_73	2798	863	1076	3152	1988	1717	2274	434	2031	1967	2549	1388	2335	1146	1587	2056	1657	1733	2801	1128	1704	2016	1856	1804	2843	989	1707	1626	6	0	0	0	0	0	1	0
Europe	ESP_74	2879	886	1096	3222	2022	1741	2308	438	2079	1991	2590	1412	2376	1167	1611	2084	2084	1613	2377	1167	1415	2590	1991	2078	2307	438	1741	2023	7	0	0	0	0	0	0	1
Europe	ESP_75	2816	877	1085	3192	2004	1725	2290	435	2057	1979	2574	1396	2354	1161	1594	2069	1579	1804	2765	1136	1700	2080	1832	1850	2848	1021	1666	1622	2	0	1	0	0	0	0	0
Europe	ESP_77	2851	883	1094	3216	2021	1739	2306	438	2080	1990	2592	1410	2375	1168	1611	2081	1586	1776	2937	1080	1813	1865	1993	1721	2899	1172	1808	1595	2	0	1	0	0	0	0	0
Europe	ESP_81	2880	887	1094	3217	2023	1741	2308	439	2081	1990	2589	1413	2377	1168	1611	2084	2084	1612	2377	1168	1413	2589	1990	2080	2307	439	1742	2023	1	1	0	0	0	0	0	0
Europe	ESP_83	2852	886	1094	3216	2023	1740	2306	438	2081	1990	2591	1411	2375	1168	1611	2084	1601	1737	2902	1178	1680	2007	1889	1854	2847	1023	1774	1622	6	0	0	0	0	0	1	0
Europe	ESP_87	2816	877	1086	3194	2005	1725	2289	436	2056	1979	2575	1395	2354	1161	1595	2068	1580	1804	2765	1136	1700	2080	1834	1850	2849	1020	1665	1622	2	0	1	0	0	0	0	0
Europe	ESP_88	2880	887	1092	3219	2023	1742	2308	439	2083	1988	2587	1413	2379	1168	1612	2082	2082	1612	2379	1168	1413	2589	1987	2082	2308	439	1742	2023	1	1	0	0	0	0	0	0
Europe	ESP_89	2841	885	1091	3211	2020	1740	2304	439	2080	1988	2587	1412	2373	1169	1608	2082	1636	1777	2820	1165	1699	2029	1832	1804	2910	1058	1686	1633	2	0	1	0	0	0	0	0
Europe	ESP_9	2845	882	1092	3215	2020	1735	2301	438	2078	1988	2588	1410	2369	1166	1607	2079	1651	1728	2862	1223	1648	2062	1824	1828	2910	1044	1669	1658	7	0	0	0	0	0	0	1
Europe	ESP_90	2820	877	1084	3193	2006	1729	2290	438	2059	1978	2572	1398	2357	1162	1598	2068	1580	1803	2767	1138	1700	2076	1835	1850	2852	1024	1667	1626	2	0	1	0	0	0	0	0
Europe	ESP_95	2840	882	1092	3213	2017	1737	2304	438	2077	1989	2590	1409	2371	1167	1608	2079	1682	1753	2835	1146	1738	2043	1889	1835	2881	1012	1729	1653	6	0	0	0	0	0	1	0
Europe	ESP_97	2879	887	1094	3218	2022	1741	2309	438	2080	1992	2590	1412	2379	1168	1609	2084	2084	1610	2379	1168	1413	2590	1992	2079	2306	438	1742	2023	1	1	0	0	0	0	0	0
Europe	ESP_98	2816	875	1085	3196	2005	1724	2291	437	2058	1977	2572	1398	2356	1161	1595	2069	1609	1779	2849	1007	1790	1886	2008	1632	2868	1173	1732	1625	3	0	0	1	0	0	0	0
Europe	FRA_1	2851	886	1094	3220	2021	1741	2309	438	2079	1992	2591	1412	2377	1168	1610	2084	2084	1611	2378	1168	1414	2590	1992	2078	2306	438	1742	2023	7	0	0	0	0	0	0	1
Europe	FRA_10	2838	879	1090	3217	2016	1733	2308	435	2075	1981	2584	1405	2375	1164	1607	2074	1649	1733	2827	1189	1692	2046	1855	1824	2869	1008	1727	1614	7	0	0	0	0	0	0	1
Europe	FRA_11	2839	879	1091	3206	2015	1737	2301	437	2073	1987	2587	1406	2369	1168	1606	2077	1652	1736	2822	1189	1691	2044	1859	1825	2868	1007	1726	1614	2	0	1	0	0	0	0	0
Europe	FRA_13	2844	883	1092	3212	2022	1736	2300	438	2075	1988	2586	1406	2370	1166	1606	2082	1646	1799	2898	1040	1707	1693	1701	1746	2846	1054	1793	1705	2	0	1	0	0	0	0	0
Europe	FRA_14	2845	885	1093	3216	2019	1739	2307	439	2077	1991	2588	1411	2376	1167	1607	2082	1649	1801	2903	1041	1710	1695	1702	1747	2852	1055	1793	1706	2	0	1	0	0	0	0	0
Europe	FRA_16	2839	880	1091	3207	2017	1735	2300	437	2073	1987	2585	1405	2370	1167	1604	2078	1650	1782	2853	1138	1640	2039	1838	1824	2867	1018	1694	1723	7	0	0	0	0	0	0	1
Europe	FRA_18	2839	880	1090	3218	2015	1733	2309	436	2071	1982	2582	1407	2373	1163	1606	2077	1649	1733	2827	1189	1692	2044	1855	1822	2870	1011	1727	1614	4	0	0	0	1	0	0	0
Europe	FRA_19	2878	886	1092	3217	2021	1740	2307	437	2081	1990	2591	1411	2376	1168	1610	2083	1620	1743	2863	1065	1842	1904	2101	1710	2797	1181	1827	1609	7	0	0	0	0	0	0	1
Europe	FRA_2	2845	884	1094	3215	2020	1740	2306	438	2078	1991	2588	1411	2376	1167	1607	2082	1621	1837	2775	1183	1722	2046	1789	1863	2885	1035	1726	1621	7	0	0	0	0	0	0	1
Europe	FRA_32	2840	877	1090	3218	2013	1734	2307	436	2070	1986	2586	1408	2369	1163	1607	2077	1651	1735	2824	1187	1693	2044	1857	1818	2869	1008	1727	1614	4	0	0	0	1	0	0	0
Europe	FRA_35	2846	887	1094	3217	2022	1741	2307	438	2080	1991	2590	1410	2378	1168	1611	2082	1672	1792	2854	1189	1674	2133	1861	1809	2988	1049	1658	1671	7	0	0	0	0	0	0	1
Europe	FRA_36	2840	880	1090	3218	2017	1731	2307	436	2074	1981	2583	1407	2372	1163	1606	2076	1651	1732	2825	1189	1692	2046	1854	1824	2869	1009	1726	1614	7	0	0	0	0	0	0	1
Europe	FRA_37	2846	885	1094	3218	2021	1740	2308	439	2081	1991	2590	1412	2378	1169	1610	2081	1672	1792	2855	1189	1673	2134	1860	1809	2988	1048	1657	1671	1	1	0	0	0	0	0	0
Europe	FRA_38	2857	887	1094	3217	2022	1741	2309	438	2081	1991	2590	1412	2379	1168	1610	2083	2083	1611	2379	1168	1413	2590	1991	2080	2307	438	1742	2023	2	0	1	0	0	0	0	0
Europe	FRA_39	2873	881	1091	3213	2017	1738	2308	437	2079	1989	2591	1409	2376	1168	1610	2078	1604	1722	2885	1029	1879	1857	2057	1706	2862	1166	1786	1584	1	1	0	0	0	0	0	0
Europe	FRA_4	2841	882	1090	3213	2015	1735	2302	435	2072	1987	2588	1404	2369	1166	1605	2077	1651	1737	2822	1188	1692	2046	1856	1825	2869	1007	1726	1614	7	0	0	0	0	0	0	1
Europe	FRA_40	2856	887	1094	3223	2023	1740	2310	438	2079	1990	2589	1410	2380	1168	1609	2084	2084	1610	2380	1168	1413	2590	1990	2078	2307	438	1742	2023	2	0	1	0	0	0	0	0
Europe	FRA_42	2835	882	1092	3209	2016	1739	2302	436	2072	1985	2586	1403	2371	1168	1608	2079	1645	1664	2847	1051	1733	1732	1735	1742	2831	1039	1672	1652	2	0	1	0	0	0	0	0
Europe	FRA_43	2848	886	1093	3216	2021	1740	2309	438	2080	1990	2590	1412	2377	1168	1610	2083	1602	1737	2899	1178	1681	2010	1888	1854	2846	1020	1773	1621	1	1	0	0	0	0	0	0
Europe	FRA_44	2848	886	1094	3221	2018	1741	2312	438	2078	1991	2589	1412	2379	1168	1609	2082	2082	1610	2379	1168	1414	2590	1991	2077	2307	438	1742	2022	7	0	0	0	0	0	0	1
Europe	FRA_47	2839	880	1090	3207	2016	1738	2301	437	2075	1986	2584	1406	2372	1168	1605	2077	1653	1735	2821	1189	1691	2045	1858	1825	2869	1008	1726	1614	7	0	0	0	0	0	0	1
Europe	FRA_49	2844	884	1092	3211	2020	1737	2304	437	2077	1990	2590	1408	2373	1167	1606	2081	1621	1835	2773	1184	1717	2046	1788	1862	2882	1034	1724	1621	3	0	0	1	0	0	0	0
Europe	FRA_5	2839	879	1091	3210	2016	1735	2303	436	2074	1986	2586	1409	2368	1164	1607	2078	1652	1735	2823	1188	1691	2043	1857	1822	2869	1009	1726	1614	2	0	1	0	0	0	0	0
Europe	FRA_51	2836	880	1090	3207	2017	1737	2301	437	2073	1987	2586	1405	2369	1166	1608	2077	1611	1761	2732	1084	1680	1670	1622	1686	2769	1098	1691	1641	1	1	0	0	0	0	0	0
Europe	FRA_52	2873	887	1093	3217	2020	1743	2308	438	2078	1991	2589	1410	2378	1167	1611	2082	2082	1612	2378	1168	1412	2589	1991	2077	2306	438	1740	2022	7	0	0	0	0	0	0	1
Europe	FRA_54	2840	878	1092	3209	2017	1735	2303	438	2074	1986	2585	1410	2368	1165	1606	2080	1619	1833	2768	1184	1715	2045	1786	1856	2879	1034	1721	1621	2	0	1	0	0	0	0	0
Europe	FRA_55	2844	886	1093	3217	2018	1741	2307	439	2077	1990	2588	1409	2377	1168	1609	2080	1586	1774	2936	1080	1814	1865	1993	1721	2895	1173	1806	1593	1	1	0	0	0	0	0	0
Europe	FRA_56	2867	889	1094	3219	2021	1742	2309	438	2081	1991	2589	1412	2380	1169	1609	2083	2084	1611	2380	1168	1414	2589	1991	2080	2306	439	1742	2022	7	0	0	0	0	0	0	1
Europe	FRA_57	2878	886	1094	3220	2020	1741	2310	438	2081	1991	2590	1413	2379	1168	1610	2082	1	3	4	0	6	3	2	1	2	0	2	1	1	1	0	0	0	0	0	0
Europe	FRA_59	2845	886	1093	3215	2021	1738	2305	438	2078	1989	2587	1409	2376	1168	1606	2081	2081	1607	2377	1167	1411	2587	1990	2077	2303	438	1739	2022	2	0	1	0	0	0	0	0
Europe	FRA_60	2627	801	1008	2937	1837	1584	2138	398	1899	1833	2393	1286	2192	1076	1464	1897	1461	1659	2577	1015	1595	1779	1696	1672	2598	949	1628	1490	7	0	0	0	0	0	0	1
Europe	FRA_61	2838	879	1090	3219	2017	1733	2305	435	2075	1983	2584	1407	2372	1162	1607	2075	1650	1732	2827	1189	1692	2048	1856	1824	2869	1008	1725	1614	2	0	1	0	0	0	0	0
Europe	FRA_63	2840	880	1090	3207	2018	1735	2296	438	2073	1989	2586	1405	2368	1166	1604	2076	1569	1727	2854	1037	1831	1808	2064	1630	2787	1249	1767	1588	7	0	0	0	0	0	0	1
Europe	FRA_65	2844	886	1094	3219	2021	1742	2307	439	2080	1992	2590	1411	2378	1169	1610	2082	1673	1794	2853	1191	1674	2134	1858	1809	2989	1049	1657	1670	7	0	0	0	0	0	0	1
Europe	FRA_7	2835	883	1090	3207	2014	1739	2303	437	2069	1983	2582	1402	2371	1167	1608	2077	1637	1818	2832	1127	1716	2050	1872	1835	2891	1013	1746	1652	7	0	0	0	0	0	0	1
Europe	FRA_71	2838	880	1089	3217	2018	1732	2306	437	2075	1981	2583	1406	2373	1164	1607	2075	1650	1732	2827	1189	1692	2046	1855	1826	2869	1009	1726	1614	7	0	0	0	0	0	0	1
Europe	FRA_72	2848	887	1094	3218	2020	1740	2307	436	2080	1991	2589	1412	2376	1167	1608	2084	1671	1791	2855	1188	1673	2132	1860	1809	2988	1048	1658	1671	3	0	0	1	0	0	0	0
Europe	FRA_76	2841	882	1091	3216	2017	1736	2308	438	2075	1989	2589	1410	2372	1166	1608	2081	1602	1719	2902	1109	1699	1703	1762	1747	2783	1056	1830	1605	7	0	0	0	0	0	0	1
Europe	FRA_8	2840	878	1091	3216	2014	1734	2306	436	2071	1985	2585	1409	2368	1163	1607	2078	1652	1735	2823	1188	1691	2044	1856	1819	2869	1008	1727	1614	7	0	0	0	0	0	0	1
Europe	FRO_1	2723	841	1049	3109	1954	1676	2228	419	2023	1933	2512	1358	2313	1132	1542	2000	1592	1667	2739	1156	1640	1983	1809	1777	2773	970	1669	1558	2	0	1	0	0	0	0	0
Europe	FRO_2	2839	878	1091	3208	2016	1733	2302	437	2073	1985	2585	1405	2369	1166	1604	2077	1652	1735	2821	1189	1691	2042	1855	1824	2869	1005	1726	1613	7	0	0	0	0	0	0	1
Europe	FRO_3	2839	878	1091	3208	2015	1734	2302	437	2072	1985	2585	1406	2367	1166	1605	2078	1651	1736	2821	1189	1691	2042	1855	1825	2869	1005	1726	1613	7	0	0	0	0	0	0	1
Europe	FRO_4	2839	879	1091	3210	2017	1735	2299	437	2072	1985	2584	1405	2366	1165	1606	2078	1652	1736	2820	1189	1691	2042	1855	1825	2869	1005	1726	1613	7	0	0	0	0	0	0	1
Europe	FRO_7	2726	848	1051	3087	1963	1672	2215	425	2005	1925	2498	1354	2291	1129	1541	2015	1592	1669	2720	1153	1644	1968	1790	1778	2758	972	1673	1559	2	0	1	0	0	0	0	0
Europe	GEO_1	2841	883	1093	3212	2017	1741	2304	437	2078	1988	2590	1407	2374	1170	1609	2079	1635	1800	2795	1135	1736	2051	1882	1850	2845	1016	1743	1637	2	0	1	0	0	0	0	0
Europe	GEO_2	2851	882	1087	3203	2017	1740	2306	435	2073	1980	2579	1409	2372	1162	1611	2080	1624	1785	2835	1068	1719	1644	1641	1707	2859	1106	1748	1653	7	0	0	0	0	0	0	1
Europe	GEO_3	2840	883	1091	3212	2018	1739	2304	438	2076	1987	2587	1409	2372	1167	1610	2079	1634	1800	2793	1133	1737	2050	1880	1850	2842	1017	1744	1638	2	0	1	0	0	0	0	0
Europe	GRC_1	2602	814	982	2907	1840	1570	2112	408	1897	1804	2359	1313	2140	1069	1461	1920	1548	1588	2597	1006	1620	1832	1744	1646	2655	966	1561	1521	2	0	1	0	0	0	0	0
Europe	GRC_10	2204	734	911	2380	1641	1397	1779	380	1669	1622	2146	1124	1790	996	1307	1717	1371	1418	2284	848	1474	1455	1675	1386	2176	951	1438	1323	2	0	1	0	0	0	0	0
Europe	GRC_11	2601	820	991	2904	1852	1575	2113	413	1892	1813	2366	1303	2145	1068	1474	1919	1512	1587	2589	977	1603	1821	1789	1590	2626	1003	1540	1521	2	0	1	0	0	0	0	0
Europe	GRC_12	2688	851	1055	3040	1957	1661	2170	427	2003	1915	2495	1349	2241	1135	1537	2012	1958	1666	2174	427	2008	1916	2494	1352	2241	1136	1538	2014	2	0	1	0	0	0	0	0
Europe	GRC_13	2781	875	1069	3143	1989	1698	2262	434	2030	1948	2538	1380	2321	1140	1579	2048	1617	1735	2803	982	1755	1746	1831	1657	2806	1086	1728	1624	2	0	1	0	0	0	0	0
Europe	GRC_15	2341	754	897	2602	1681	1431	1905	374	1728	1608	2128	1191	1920	979	1344	1750	1360	1458	2359	913	1440	1472	1455	1443	2373	902	1460	1359	2	0	1	0	0	0	0	0
Europe	GRC_16	2809	876	1081	3169	2002	1716	2268	431	2051	1965	2560	1395	2330	1153	1590	2068	1582	1713	2857	1167	1654	1985	1866	1830	2810	1012	1747	1597	2	0	1	0	0	0	0	0
Europe	GRC_17	2826	881	1084	3197	2010	1723	2284	434	2058	1974	2568	1400	2351	1156	1595	2071	1607	1791	2775	1014	1689	1740	1615	1755	2836	990	1692	1649	2	0	1	0	0	0	0	0
Europe	GRC_2	2817	880	1084	3193	2006	1723	2282	434	2058	1974	2568	1398	2350	1155	1595	2067	2005	1723	2283	434	2061	1973	2567	1398	2349	1156	1597	2068	2	0	1	0	0	0	0	0
Europe	GRC_3	2822	878	1083	3186	2007	1722	2277	433	2053	1968	2561	1398	2341	1153	1595	2070	2006	1723	2278	433	2056	1967	2560	1399	2342	1154	1596	2070	2	0	1	0	0	0	0	0
Europe	GRC_4	2653	845	1048	2985	1937	1654	2144	424	1978	1896	2467	1339	2205	1119	1528	1995	1545	1718	2626	983	1619	1652	1540	1672	2680	960	1621	1575	2	0	1	0	0	0	0	0
Europe	GRC_5	2806	876	1083	3175	2000	1718	2274	433	2053	1966	2560	1396	2336	1153	1593	2063	2065	1594	2337	1153	1399	2560	1967	2053	2274	433	1721	1999	2	0	1	0	0	0	0	0
Europe	GRC_6	2822	877	1084	3181	2008	1723	2279	435	2054	1972	2566	1399	2344	1156	1595	2072	1583	1733	2948	1065	1815	1849	2004	1752	2862	1145	1806	1598	2	0	1	0	0	0	0	0
Europe	GRC_7	2868	887	1094	3219	2023	1742	2307	438	2080	1991	2589	1411	2377	1168	1610	2084	2084	1611	2377	1168	1413	2590	1991	2079	2307	438	1742	2023	1	1	0	0	0	0	0	0
Europe	GRC_8	1449	509	649	1644	1152	968	1218	306	1195	1145	1502	828	1223	722	908	1202	980	973	1578	613	1034	996	1199	977	1540	679	989	890	4	0	0	0	1	0	0	0
Europe	GRC_9	2797	873	1082	3180	1995	1716	2271	431	2044	1965	2562	1388	2333	1153	1591	2061	1636	1705	2863	988	1837	1825	2035	1695	2793	1128	1765	1637	2	0	1	0	0	0	0	0
Europe	HRV_5	2847	886	1090	3214	2023	1736	2304	439	2079	1991	2588	1411	2374	1168	1606	2083	1670	1789	2855	1187	1672	2131	1859	1810	2986	1050	1655	1672	7	0	0	0	0	0	0	1
Europe	HRV_6	2845	886	1091	3214	2025	1738	2305	439	2079	1991	2588	1413	2375	1166	1609	2084	1671	1789	2855	1188	1672	2130	1858	1811	2987	1050	1656	1671	3	0	0	1	0	0	0	0
Europe	HUN_1	2800	864	1073	3187	1992	1702	2278	429	2046	1958	2555	1385	2342	1148	1581	2048	1622	1708	2794	1176	1667	2014	1828	1797	2827	997	1705	1587	7	0	0	0	0	0	0	1
Europe	HUN_17	2839	880	1086	3204	2018	1738	2302	435	2076	1987	2585	1410	2370	1164	1607	2080	1653	1735	2821	1186	1692	2043	1855	1826	2870	1009	1726	1616	7	0	0	0	0	0	0	1
Europe	HUN_25	2841	879	1086	3215	2016	1735	2303	436	2073	1986	2587	1405	2370	1166	1606	2077	1650	1734	2826	1188	1691	2045	1854	1824	2871	1007	1726	1614	7	0	0	0	0	0	0	1
Europe	HUN_36	2838	879	1091	3207	2015	1737	2302	437	2074	1987	2586	1407	2370	1168	1605	2078	1653	1736	2821	1189	1691	2045	1858	1825	2868	1007	1726	1614	1	1	0	0	0	0	0	0
Europe	HUN_5	2840	881	1088	3212	2017	1735	2302	436	2073	1986	2587	1405	2369	1166	1606	2078	1652	1737	2822	1188	1692	2044	1853	1825	2871	1008	1726	1614	7	0	0	0	0	0	0	1
Europe	ITA_1	2859	888	1092	3219	2027	1741	2307	440	2080	1991	2591	1411	2376	1168	1614	2085	1647	1765	2901	1191	1666	2091	1880	1832	2943	1062	1681	1682	3	0	0	1	0	0	0	0
Europe	ITA_10	2857	887	1093	3219	2025	1742	2306	440	2080	1991	2590	1411	2376	1168	1613	2085	1644	1765	2900	1191	1666	2091	1880	1833	2942	1062	1681	1682	3	0	0	1	0	0	0	0
Europe	ITA_101	2860	887	1093	3219	2022	1741	2307	438	2079	1990	2590	1411	2376	1168	1611	2084	1682	1680	2941	1063	1833	1882	2091	1663	2900	1190	1763	1643	2	0	1	0	0	0	0	0
Europe	ITA_102	2829	870	1076	3182	2008	1719	2283	434	2058	1966	2563	1394	2350	1157	1593	2066	1628	1704	2853	1224	1664	2046	1817	1811	2933	1006	1696	1561	2	0	1	0	0	0	0	0
Europe	ITA_107	2880	888	1094	3226	2024	1741	2305	436	2081	1990	2589	1410	2378	1166	1610	2083	1	1	0	1	7	4	0	2	0	1	0	0	7	0	0	0	0	0	0	1
Europe	ITA_108	2846	886	1089	3219	2021	1740	2306	439	2079	1990	2589	1410	2376	1168	1610	2083	1625	1757	2871	1185	1716	2030	1876	1848	2888	1046	1745	1620	7	0	0	0	0	0	0	1
Europe	ITA_116	2872	881	1092	3222	2017	1737	2307	435	2073	1987	2588	1404	2374	1165	1608	2079	1621	1761	2817	1031	1714	1691	1722	1684	2813	1070	1758	1652	2	0	1	0	0	0	0	0
Europe	ITA_118	2869	885	1088	3224	2021	1741	2310	439	2076	1992	2590	1410	2380	1165	1611	2082	2082	1611	2380	1167	1414	2590	1991	2074	2307	439	1745	2023	6	0	0	0	0	0	1	0
Europe	ITA_12	2847	884	1088	3215	2022	1737	2304	439	2079	1989	2589	1410	2373	1168	1608	2082	1654	1725	2863	1223	1649	2063	1826	1829	2914	1044	1670	1658	7	0	0	0	0	0	0	1
Europe	ITA_120	2872	880	1090	3226	2015	1734	2314	437	2079	1984	2587	1411	2378	1164	1610	2075	1682	1750	2839	1144	1743	2044	1884	1834	2894	1011	1736	1660	6	0	0	0	0	0	1	0
Europe	ITA_121	2844	882	1090	3214	2018	1737	2303	437	2077	1988	2587	1409	2372	1166	1606	2079	1627	1785	2841	1071	1724	1648	1646	1704	2853	1106	1748	1649	6	0	0	0	0	0	1	0
Europe	ITA_125	2826	875	1085	3184	2013	1725	2276	436	2060	1976	2571	1394	2347	1160	1596	2070	1632	1711	2849	1229	1662	2053	1825	1810	2930	1015	1696	1565	7	0	0	0	0	0	0	1
Europe	ITA_126	2850	882	1088	3216	2019	1738	2306	439	2079	1989	2591	1409	2373	1168	1610	2079	1651	1732	2828	1035	1734	1734	1761	1739	2790	1051	1744	1682	7	0	0	0	0	0	0	1
Europe	ITA_129	2880	886	1090	3223	2022	1741	2310	438	2078	1994	2592	1411	2379	1164	1613	2081	2081	1613	2379	1167	1414	2591	1990	2076	2307	438	1743	2023	1	1	0	0	0	0	0	0
Europe	ITA_130	2879	883	1090	3217	2022	1742	2304	437	2078	1994	2591	1411	2374	1166	1610	2085	1651	1804	2903	1039	1710	1699	1704	1747	2862	1053	1798	1711	2	0	1	0	0	0	0	0
Europe	ITA_135	2883	887	1097	3221	2019	1741	2307	437	2080	1991	2591	1410	2377	1169	1609	2081	2081	1611	2379	1169	1413	2589	1991	2079	2306	437	1742	2022	1	1	0	0	0	0	0	0
Europe	ITA_142	2872	890	1094	3219	2026	1742	2306	439	2080	1991	2590	1410	2377	1168	1612	2086	1637	1797	2842	1151	1674	2078	1898	1841	2853	1046	1720	1696	3	0	0	1	0	0	0	0
Europe	ITA_143	2839	878	1091	3213	2019	1733	2301	436	2076	1985	2584	1409	2368	1162	1606	2078	1623	1782	2838	1070	1722	1649	1643	1705	2850	1104	1742	1650	7	0	0	0	0	0	0	1
Europe	ITA_147	2831	874	1085	3192	2014	1724	2284	434	2063	1977	2576	1395	2354	1160	1596	2071	1633	1710	2857	1230	1666	2054	1825	1810	2936	1014	1700	1566	2	0	1	0	0	0	0	0
Europe	ITA_149	2817	876	1084	3183	2001	1723	2280	431	2050	1973	2570	1387	2347	1155	1597	2064	1633	1740	2766	1137	1685	2038	1898	1766	2835	1031	1691	1620	3	0	0	1	0	0	0	0
Europe	ITA_15	2831	874	1084	3186	2014	1726	2282	438	2065	1975	2571	1399	2353	1161	1598	2070	1611	1808	2869	1138	1617	2046	1819	1757	2958	1031	1691	1643	2	0	1	0	0	0	0	0
Europe	ITA_153	2846	888	1093	3218	2022	1740	2308	438	2078	1989	2590	1411	2374	1168	1611	2084	1695	1719	2854	1047	1840	1900	2077	1675	2842	1148	1793	1633	1	1	0	0	0	0	0	0
Europe	ITA_155	2881	887	1088	3225	2024	1741	2307	439	2080	1992	2589	1410	2380	1167	1610	2082	2082	1611	2380	1167	1414	2592	1991	2079	2306	439	1744	2023	4	0	0	0	1	0	0	0
Europe	ITA_158	2879	887	1090	3227	2023	1737	2307	436	2080	1988	2588	1411	2375	1166	1607	2085	1617	1810	2799	1021	1710	1757	1622	1772	2861	998	1707	1659	1	1	0	0	0	0	0	0
Europe	ITA_160	2880	884	1090	3224	2019	1738	2313	437	2078	1991	2589	1415	2377	1164	1609	2083	2083	1609	2377	1167	1416	2590	1988	2075	2307	438	1741	2023	3	0	0	1	0	0	0	0
Europe	ITA_164	2840	881	1088	3210	2020	1729	2297	437	2073	1981	2579	1408	2363	1162	1602	2080	1667	1649	2978	1043	1810	1853	2125	1667	2846	1181	1785	1665	7	0	0	0	0	0	0	1
Europe	ITA_165	2876	879	1091	3221	2016	1735	2311	438	2076	1989	2590	1412	2373	1163	1611	2077	1579	1819	2883	1149	1752	2008	1851	1830	2954	1102	1715	1630	7	0	0	0	0	0	0	1
Europe	ITA_169	2833	874	1082	3190	2014	1725	2283	438	2063	1977	2573	1397	2354	1160	1598	2069	1632	1711	2857	1228	1665	2053	1825	1810	2937	1015	1700	1567	7	0	0	0	0	0	0	1
Europe	ITA_17	2872	883	1092	3211	2016	1730	2299	438	2076	1983	2585	1406	2367	1165	1604	2075	1559	1759	2939	1021	1850	1832	2030	1725	2868	1192	1794	1609	2	0	1	0	0	0	0	0
Europe	ITA_171	2831	874	1086	3190	2014	1725	2282	438	2063	1976	2573	1397	2352	1161	1598	2070	1632	1711	2857	1231	1665	2053	1826	1812	2936	1015	1700	1565	2	0	1	0	0	0	0	0
Europe	ITA_172	2845	887	1094	3224	2020	1741	2305	436	2077	1991	2588	1408	2376	1167	1607	2082	1655	1805	2850	989	1876	1977	2050	1701	2942	1117	1747	1617	2	0	1	0	0	0	0	0
Europe	ITA_173	2772	870	1078	3139	1988	1704	2252	428	2035	1957	2548	1380	2318	1152	1572	2054	1631	1703	2836	985	1820	1816	2016	1691	2774	1126	1749	1634	2	0	1	0	0	0	0	0
Europe	ITA_176	2847	884	1088	3215	2022	1737	2303	439	2079	1990	2590	1410	2372	1168	1608	2082	1654	1725	2863	1223	1649	2063	1827	1829	2913	1044	1670	1658	2	0	1	0	0	0	0	0
Europe	ITA_177	2769	875	1065	3117	1970	1694	2250	427	2021	1944	2525	1375	2315	1133	1564	2034	1582	1743	2795	987	1763	1857	1977	1607	2823	1155	1705	1600	7	0	0	0	0	0	0	1
Europe	ITA_179	2849	888	1090	3219	2024	1739	2306	440	2080	1991	2589	1411	2376	1168	1609	2084	1675	1747	2789	1012	1808	1721	1782	1677	2856	1094	1730	1625	7	0	0	0	0	0	0	1
Europe	ITA_18	2878	885	1092	3221	2021	1740	2308	437	2079	1991	2590	1412	2377	1166	1610	2083	1601	1734	2905	1178	1681	2008	1888	1852	2848	1021	1775	1623	6	0	0	0	0	0	1	0
Europe	ITA_181	2852	891	1093	3219	2025	1742	2307	439	2080	1991	2591	1410	2377	1168	1613	2084	1677	1749	2790	1014	1808	1721	1784	1678	2854	1094	1730	1624	2	0	1	0	0	0	0	0
Europe	ITA_182	2849	884	1093	3215	2022	1739	2305	438	2080	1990	2592	1410	2373	1168	1612	2082	1573	1729	2860	1040	1837	1811	2071	1636	2800	1251	1774	1589	2	0	1	0	0	0	0	0
Europe	ITA_183	2847	884	1090	3219	2022	1738	2304	439	2078	1990	2588	1409	2375	1167	1609	2081	1617	1784	2789	1085	1781	1706	1662	1794	2813	1053	1773	1605	4	0	0	0	1	0	0	0
Europe	ITA_184	2878	887	1091	3220	2022	1741	2307	439	2079	1990	2590	1410	2375	1168	1611	2084	2084	1612	2376	1168	1412	2590	1991	2078	2307	439	1744	2022	7	0	0	0	0	0	0	1
Europe	ITA_186	2831	874	1086	3190	2014	1726	2281	438	2063	1976	2572	1397	2352	1162	1597	2071	1632	1711	2857	1230	1664	2053	1827	1812	2935	1015	1700	1566	2	0	1	0	0	0	0	0
Europe	ITA_189	2839	882	1092	3209	2017	1737	2301	438	2076	1990	2588	1409	2370	1167	1606	2079	1591	1724	2919	988	1801	1873	2070	1706	2808	1149	1756	1665	2	0	1	0	0	0	0	0
Europe	ITA_195	2845	886	1092	3222	2021	1740	2305	438	2080	1990	2592	1409	2374	1169	1611	2082	1632	1769	2840	1097	1745	1956	1900	1761	2875	1069	1738	1625	2	0	1	0	0	0	0	0
Europe	ITA_2	2847	883	1088	3222	2021	1737	2305	439	2077	1988	2587	1410	2373	1167	1608	2082	1653	1724	2865	1222	1651	2064	1826	1829	2914	1043	1670	1658	7	0	0	0	0	0	0	1
Europe	ITA_200	2845	884	1091	3212	2021	1737	2305	439	2078	1988	2588	1411	2372	1168	1608	2082	1637	1703	2901	1160	1699	1711	1708	1746	2854	1081	1780	1606	1	1	0	0	0	0	0	0
Europe	ITA_201	2881	889	1092	3227	2020	1741	2310	439	2077	1989	2588	1409	2379	1169	1610	2082	2082	1612	2379	1169	1413	2590	1989	2077	2307	439	1744	2021	2	0	1	0	0	0	0	0
Europe	ITA_206	2847	884	1089	3217	2022	1739	2304	439	2078	1988	2588	1409	2374	1168	1610	2082	1634	1768	2818	1129	1756	1927	1851	1784	2861	1063	1759	1602	7	0	0	0	0	0	0	1
Europe	ITA_207	2880	885	1093	3223	2019	1740	2312	438	2080	1990	2589	1413	2381	1166	1611	2080	2019	1739	2313	438	2084	1992	2589	1411	2377	1166	1611	2083	4	0	0	0	1	0	0	0
Europe	ITA_213	2878	884	1093	3232	2020	1738	2315	438	2080	1986	2587	1412	2383	1164	1613	2078	0	3	0	0	14	7	0	1	0	1	2	0	2	0	1	0	0	0	0	0
Europe	ITA_216	2847	884	1087	3215	2020	1737	2306	440	2079	1989	2589	1410	2375	1168	1609	2079	1653	1725	2864	1224	1650	2063	1825	1829	2915	1044	1670	1657	6	0	0	0	0	0	1	0
Europe	ITA_223	2843	882	1088	3217	2017	1739	2306	439	2078	1990	2591	1409	2373	1168	1610	2079	1639	1764	2788	1147	1708	2096	1903	1828	2850	1003	1714	1622	7	0	0	0	0	0	0	1
Europe	ITA_225	2879	885	1093	3230	2021	1738	2314	437	2080	1986	2587	1412	2381	1164	1612	2080	1630	1793	2719	1083	1741	2118	1909	1878	2775	1018	1657	1712	1	1	0	0	0	0	0	0
Europe	ITA_226	2879	885	1092	3223	2023	1743	2307	438	2080	1991	2589	1411	2378	1168	1611	2084	2084	1611	2378	1168	1413	2591	1991	2077	2307	438	1742	2023	4	0	0	0	1	0	0	0
Europe	ITA_227	2878	885	1092	3221	2023	1740	2307	437	2080	1991	2590	1413	2375	1164	1612	2083	1695	1718	2855	1046	1841	1901	2077	1672	2843	1147	1797	1634	6	0	0	0	0	0	1	0
Europe	ITA_23	2881	885	1092	3223	2020	1741	2309	437	2079	1992	2589	1412	2378	1166	1609	2083	1627	1795	2720	1084	1738	2116	1910	1880	2774	1020	1657	1713	6	0	0	0	0	0	1	0
Europe	ITA_235	2846	882	1088	3221	2019	1733	2308	435	2077	1990	2589	1411	2375	1162	1606	2080	1618	1722	2863	1020	1797	1722	1840	1750	2774	1087	1780	1648	5	0	0	0	0	1	0	0
Europe	ITA_238	2882	886	1091	3221	2023	1737	2309	438	2079	1990	2591	1410	2377	1168	1609	2084	1623	1729	2856	1094	1677	1785	1719	1805	2789	1014	1748	1676	7	0	0	0	0	0	0	1
Europe	ITA_243	2884	887	1091	3222	2023	1740	2307	439	2079	1991	2589	1411	2377	1166	1611	2082	1630	1797	2715	1083	1737	2115	1908	1879	2775	1019	1658	1713	7	0	0	0	0	0	0	1
Europe	ITA_245	2851	885	1094	3219	2023	1741	2309	438	2080	1992	2590	1414	2377	1165	1612	2084	1674	1748	2791	1014	1809	1721	1783	1675	2857	1094	1730	1624	7	0	0	0	0	0	0	1
Europe	ITA_247	2876	884	1092	3221	2019	1737	2305	436	2077	1988	2589	1406	2374	1168	1606	2081	1613	1735	2889	1039	1848	1843	2028	1680	2872	1156	1810	1572	7	0	0	0	0	0	0	1
Europe	ITA_249	2856	882	1095	3216	2018	1741	2309	438	2078	1990	2591	1411	2375	1169	1611	2082	1653	1733	2830	1037	1737	1733	1765	1739	2796	1052	1747	1681	2	0	1	0	0	0	0	0
Europe	ITA_255	2845	882	1089	3218	2019	1739	2305	439	2078	1990	2590	1411	2372	1167	1610	2081	1619	1728	2882	983	1882	1831	2069	1670	2847	1186	1762	1619	7	0	0	0	0	0	0	1
Europe	ITA_259	2877	887	1091	3217	2024	1741	2307	438	2080	1991	2590	1410	2377	1168	1610	2084	2084	1611	2377	1168	1413	2590	1991	2079	2307	438	1744	2023	7	0	0	0	0	0	0	1
Europe	ITA_26	2847	884	1090	3219	2022	1738	2303	439	2078	1991	2588	1409	2375	1167	1607	2081	1571	1727	2862	1039	1836	1812	2068	1636	2798	1251	1771	1590	2	0	1	0	0	0	0	0
Europe	ITA_266	2857	887	1096	3219	2023	1741	2308	439	2080	1991	2590	1411	2378	1169	1611	2084	1674	1749	2791	1014	1808	1721	1786	1676	2854	1094	1730	1624	7	0	0	0	0	0	0	1
Europe	ITA_269	2834	876	1086	3196	2016	1727	2288	438	2067	1979	2577	1402	2356	1161	1601	2074	1634	1713	2866	1234	1667	2053	1827	1815	2944	1016	1702	1566	2	0	1	0	0	0	0	0
Europe	ITA_270	2844	885	1092	3215	2022	1739	2305	437	2084	1989	2590	1410	2378	1169	1608	2080	1653	1787	2879	1063	1733	1687	1702	1745	2846	1045	1820	1650	2	0	1	0	0	0	0	0
Europe	ITA_273	2846	883	1087	3220	2016	1733	2309	435	2077	1990	2590	1412	2373	1163	1605	2078	1626	1784	2846	1071	1724	1652	1641	1705	2855	1104	1748	1651	2	0	1	0	0	0	0	0
Europe	ITA_274	2831	881	1082	3184	2015	1731	2290	438	2066	1980	2579	1403	2353	1162	1604	2077	1579	1815	2858	1144	1745	1997	1839	1826	2932	1099	1705	1617	7	0	0	0	0	0	0	1
Europe	ITA_28	2820	876	1082	3193	2004	1721	2282	431	2052	1972	2568	1394	2345	1155	1594	2068	1633	1738	2769	1137	1684	2041	1895	1768	2832	1033	1691	1622	2	0	1	0	0	0	0	0
Europe	ITA_281	2833	873	1082	3192	2015	1725	2282	437	2064	1975	2572	1398	2352	1161	1597	2072	1633	1709	2858	1228	1665	2054	1825	1812	2937	1014	1700	1567	6	0	0	0	0	0	1	0
Europe	ITA_285	2840	882	1092	3215	2017	1741	2305	438	2079	1989	2590	1410	2372	1168	1610	2079	1609	1754	2804	1088	1737	1675	1658	1740	2812	1070	1750	1602	7	0	0	0	0	0	0	1
Europe	ITA_289	2881	887	1090	3228	2024	1740	2307	436	2080	1989	2589	1412	2376	1165	1611	2085	2023	1740	2308	438	2083	1992	2586	1410	2376	1168	1612	2084	5	0	0	0	0	1	0	0
Europe	ITA_29	2873	887	1092	3220	2024	1741	2307	440	2080	1991	2590	1411	2377	1169	1612	2084	1675	1749	2790	1013	1808	1721	1784	1676	2855	1094	1730	1625	2	0	1	0	0	0	0	0
Europe	ITA_290	2878	886	1093	3229	2021	1737	2315	437	2079	1986	2587	1413	2381	1162	1612	2080	1619	1810	2797	1021	1711	1758	1622	1767	2860	996	1708	1660	7	0	0	0	0	0	0	1
Europe	ITA_291	2834	874	1082	3192	2015	1725	2282	438	2062	1976	2573	1396	2352	1161	1598	2071	1631	1711	2858	1228	1665	2052	1825	1811	2938	1016	1700	1567	7	0	0	0	0	0	0	1
Europe	ITA_292	2866	884	1092	3216	2020	1740	2306	438	2078	1990	2590	1410	2374	1168	1610	2082	1627	1787	2843	1074	1724	1651	1648	1709	2864	1108	1752	1655	4	0	0	0	1	0	0	0
Europe	ITA_294	2878	885	1092	3227	2023	1742	2307	436	2081	1992	2591	1410	2380	1164	1613	2080	0	2	0	1	13	4	0	3	0	1	0	0	2	0	1	0	0	0	0	0
Europe	ITA_295	2845	884	1087	3217	2021	1738	2305	439	2079	1988	2586	1410	2376	1169	1605	2083	1587	1772	2936	1076	1813	1863	1989	1721	2895	1174	1806	1594	2	0	1	0	0	0	0	0
Europe	ITA_297	2847	882	1083	3213	2018	1735	2303	437	2075	1984	2584	1405	2373	1166	1606	2076	1627	1780	2840	1069	1722	1644	1644	1702	2852	1105	1749	1648	7	0	0	0	0	0	0	1
Europe	ITA_299	2831	874	1085	3191	2012	1726	2284	436	2062	1977	2574	1397	2353	1160	1598	2071	1630	1711	2859	1230	1665	2054	1826	1812	2936	1014	1701	1566	7	0	0	0	0	0	0	1
Europe	ITA_3	2832	874	1084	3190	2014	1725	2285	437	2065	1975	2574	1399	2353	1161	1598	2072	1633	1710	2862	1234	1666	2051	1823	1810	2943	1015	1697	1563	7	0	0	0	0	0	0	1
Europe	ITA_300	2877	880	1086	3219	2018	1737	2308	439	2080	1988	2589	1408	2378	1168	1609	2076	1584	1815	2881	1146	1753	2007	1853	1828	2956	1103	1715	1628	2	0	1	0	0	0	0	0
Europe	ITA_301	2834	874	1085	3194	2018	1727	2283	439	2066	1978	2573	1399	2356	1161	1599	2073	1632	1713	2861	1229	1668	2053	1827	1813	2938	1017	1701	1569	2	0	1	0	0	0	0	0
Europe	ITA_303	2845	885	1089	3214	2021	1738	2305	439	2080	1987	2587	1412	2372	1168	1609	2082	1627	1785	2844	1072	1723	1649	1646	1711	2855	1109	1748	1652	7	0	0	0	0	0	0	1
Europe	ITA_34	2847	884	1088	3218	2021	1737	2305	439	2078	1989	2589	1408	2375	1168	1608	2080	1652	1725	2865	1223	1649	2063	1826	1828	2914	1044	1670	1658	7	0	0	0	0	0	0	1
Europe	ITA_35	2831	874	1086	3191	2014	1725	2281	438	2062	1978	2574	1397	2351	1160	1598	2070	1631	1711	2858	1231	1665	2053	1827	1812	2935	1015	1700	1565	7	0	0	0	0	0	0	1
Europe	ITA_37	2843	884	1091	3214	2021	1737	2303	438	2076	1990	2589	1409	2371	1166	1608	2082	1646	1695	2876	1073	1914	1833	2055	1724	2839	1148	1840	1535	2	0	1	0	0	0	0	0
Europe	ITA_38	2879	885	1093	3225	2021	1740	2308	434	2081	1991	2592	1410	2378	1165	1609	2082	2082	1610	2378	1168	1414	2592	1988	2078	2306	435	1741	2022	1	1	0	0	0	0	0	0
Europe	ITA_4	2873	883	1089	3217	2018	1740	2305	438	2078	1987	2587	1410	2374	1168	1610	2081	1620	1729	2880	983	1881	1830	2066	1668	2861	1187	1769	1619	2	0	1	0	0	0	0	0
Europe	ITA_40	2856	887	1091	3222	2023	1740	2305	437	2080	1993	2592	1410	2376	1166	1611	2082	2082	1612	2379	1167	1414	2590	1992	2078	2305	438	1744	2023	7	0	0	0	0	0	0	1
Europe	ITA_41	2845	887	1090	3216	2022	1741	2306	439	2080	1990	2590	1411	2375	1168	1610	2083	1565	1732	2825	1072	1718	1702	1683	1751	2811	1082	1701	1610	7	0	0	0	0	0	0	1
Europe	ITA_46	2837	881	1088	3204	2015	1738	2302	440	2075	1987	2588	1407	2367	1168	1610	2077	1582	1820	2873	1148	1750	2000	1851	1829	2939	1101	1708	1624	2	0	1	0	0	0	0	0
Europe	ITA_48	2873	882	1090	3226	2018	1734	2312	437	2079	1984	2586	1411	2377	1164	1609	2078	1587	1816	2879	1147	1754	2011	1850	1830	2954	1102	1715	1629	6	0	0	0	0	0	1	0
Europe	ITA_5	2859	887	1091	3218	2024	1741	2306	439	2080	1991	2590	1411	2376	1168	1611	2084	1630	1797	2715	1083	1737	2115	1910	1881	2775	1020	1657	1713	6	0	0	0	0	0	1	0
Europe	ITA_50	2875	882	1091	3230	2019	1736	2313	437	2077	1984	2587	1409	2379	1163	1612	2077	1561	1759	2950	1023	1860	1834	2034	1726	2872	1193	1801	1616	2	0	1	0	0	0	0	0
Europe	ITA_55	2831	874	1086	3190	2014	1726	2282	436	2063	1978	2573	1397	2354	1159	1597	2070	1631	1712	2858	1230	1665	2054	1825	1812	2937	1014	1700	1566	7	0	0	0	0	0	0	1
Europe	ITA_56	2872	885	1091	3222	2022	1740	2305	437	2080	1993	2591	1412	2375	1166	1608	2084	0	3	0	0	5	2	0	0	0	2	3	0	2	0	1	0	0	0	0	0
Europe	ITA_6	2882	887	1090	3219	2023	1740	2306	439	2079	1990	2590	1409	2377	1168	1611	2082	1564	1732	2825	1071	1719	1702	1683	1750	2812	1083	1705	1612	2	0	1	0	0	0	0	0
Europe	ITA_61	2881	887	1091	3218	2024	1740	2306	439	2079	1991	2589	1410	2375	1167	1611	2084	2084	1612	2376	1167	1413	2590	1992	2078	2306	439	1743	2023	2	0	1	0	0	0	0	0
Europe	ITA_62	2878	884	1094	3230	2021	1737	2314	436	2080	1986	2589	1413	2379	1163	1612	2081	1628	1793	2721	1083	1741	2118	1910	1879	2774	1018	1657	1712	6	0	0	0	0	0	1	0
Europe	ITA_63	2837	878	1083	3207	2012	1728	2299	433	2070	1983	2578	1408	2368	1155	1601	2070	1645	1722	2856	1215	1644	2054	1814	1816	2899	1040	1664	1655	2	0	1	0	0	0	0	0
Europe	ITA_70	2883	887	1095	3219	2021	1742	2306	438	2080	1991	2590	1411	2377	1168	1611	2082	0	2	0	0	4	0	0	0	1	0	0	1	7	0	0	0	0	0	0	1
Europe	ITA_72	2850	887	1092	3221	2024	1741	2307	440	2080	1991	2589	1412	2377	1167	1612	2084	1670	1661	2992	1049	1812	1861	2130	1675	2855	1188	1792	1673	2	0	1	0	0	0	0	0
Europe	ITA_73	2869	882	1089	3209	2017	1738	2304	436	2074	1984	2582	1406	2372	1166	1609	2081	1598	1715	2906	1040	1855	1836	2040	1679	2883	1184	1781	1575	2	0	1	0	0	0	0	0
Europe	ITA_77	2871	882	1089	3210	2018	1739	2306	438	2080	1987	2586	1410	2373	1167	1609	2080	1625	1790	2861	1009	1802	1902	2026	1642	2900	1179	1751	1644	2	0	1	0	0	0	0	0
Europe	ITA_79	2828	870	1080	3185	2005	1718	2280	431	2062	1969	2569	1395	2348	1158	1590	2064	1626	1704	2850	1224	1661	2049	1822	1806	2929	1013	1693	1562	7	0	0	0	0	0	0	1
Europe	ITA_84	2831	873	1085	3190	2014	1726	2282	436	2064	1977	2574	1397	2353	1160	1598	2070	1632	1711	2857	1230	1665	2054	1826	1811	2936	1014	1700	1566	7	0	0	0	0	0	0	1
Europe	ITA_9	2847	884	1088	3223	2022	1737	2304	439	2077	1988	2587	1408	2373	1167	1608	2081	1627	1785	2844	1072	1725	1652	1646	1710	2855	1107	1749	1652	7	0	0	0	0	0	0	1
Europe	ITA_91	2877	883	1086	3217	2019	1738	2306	439	2075	1989	2589	1408	2373	1167	1609	2080	1648	1693	2875	1072	1917	1835	2055	1724	2848	1145	1847	1538	2	0	1	0	0	0	0	0
Europe	ITA_92	2839	881	1091	3217	2015	1735	2308	439	2079	1989	2589	1413	2374	1167	1606	2077	1638	1762	2790	1148	1709	2096	1900	1829	2850	1003	1710	1620	2	0	1	0	0	0	0	0
Europe	ITA_94	2846	884	1089	3220	2020	1735	2307	439	2079	1990	2589	1410	2377	1166	1608	2078	1615	1783	2792	1084	1783	1706	1662	1794	2811	1053	1773	1604	2	0	1	0	0	0	0	0
Europe	ITA_95	2844	885	1093	3210	2022	1739	2303	436	2077	1990	2589	1408	2374	1165	1608	2082	1631	1740	2873	1103	1767	1946	1939	1766	2879	1086	1747	1617	2	0	1	0	0	0	0	0
Europe	ITA_98	2841	882	1088	3214	2018	1736	2305	439	2078	1989	2589	1409	2372	1168	1606	2079	1621	1726	2879	983	1882	1830	2068	1668	2844	1186	1762	1615	6	0	0	0	0	0	1	0
Europe	POL_2	2880	888	1090	3215	2025	1743	2308	438	2081	1990	2589	1413	2377	1166	1614	2085	2084	1612	2377	1166	1413	2589	1990	2081	2308	439	1743	2025	1	1	0	0	0	0	0	0
Europe	POL_4	2815	870	1080	3186	2002	1720	2280	437	2060	1970	2562	1396	2352	1154	1595	2054	1643	1722	2794	1177	1685	2026	1843	1805	2846	997	1715	1600	7	0	0	0	0	0	0	1
Europe	POL_5	2840	879	1087	3215	2014	1737	2304	437	2073	1985	2584	1406	2372	1166	1607	2075	1652	1736	2822	1187	1692	2049	1856	1824	2870	1005	1726	1615	7	0	0	0	0	0	0	1
Europe	POL_6	2805	865	1077	3175	1995	1705	2268	432	2053	1962	2555	1392	2335	1148	1582	2050	1633	1711	2780	1174	1675	2016	1835	1803	2834	993	1705	1591	2	0	1	0	0	0	0	0
Europe	ROU_1	2878	889	1095	3218	2023	1740	2305	439	2077	1990	2590	1409	2373	1168	1611	2084	1691	1730	2761	1096	1793	1627	1716	1697	2772	1083	1831	1585	2	0	1	0	0	0	0	0
Europe	ROU_10	2843	884	1095	3214	2023	1738	2300	438	2077	1991	2588	1409	2371	1166	1607	2083	2082	1609	2373	1167	1412	2588	1989	2077	2303	438	1736	2021	1	1	0	0	0	0	0	0
Europe	ROU_12	2852	889	1094	3216	2022	1740	2305	438	2079	1990	2591	1410	2373	1168	1611	2084	1622	1745	2860	1065	1842	1904	2102	1711	2796	1181	1826	1608	2	0	1	0	0	0	0	0
Europe	ROU_13	2880	887	1095	3222	2022	1741	2308	439	2078	1991	2591	1409	2377	1168	1612	2082	2082	1613	2378	1168	1412	2589	1991	2076	2307	439	1741	2023	1	1	0	0	0	0	0	0
Europe	ROU_14	2880	887	1090	3217	2023	1740	2306	439	2079	1990	2590	1411	2375	1168	1611	2084	1602	1736	2901	1178	1680	2007	1888	1853	2848	1023	1776	1623	6	0	0	0	0	0	1	0
Europe	ROU_15	2882	887	1089	3222	2023	1742	2308	439	2079	1990	2589	1411	2377	1168	1612	2084	2084	1612	2377	1168	1413	2590	1990	2078	2307	439	1745	2023	1	1	0	0	0	0	0	0
Europe	ROU_16	2885	886	1095	3220	2023	1738	2307	438	2080	1990	2592	1411	2374	1168	1611	2084	1622	1731	2856	1096	1677	1785	1719	1806	2790	1014	1746	1673	2	0	1	0	0	0	0	0
Europe	ROU_17	2850	888	1091	3218	2026	1739	2304	441	2081	1992	2589	1411	2377	1168	1609	2083	2025	1739	2307	439	2082	1990	2589	1411	2377	1169	1611	2082	2	0	1	0	0	0	0	0
Europe	ROU_2	2882	887	1091	3219	2025	1741	2306	439	2080	1991	2590	1411	2376	1168	1611	2085	0	1	1	0	3	0	0	1	1	1	2	0	7	0	0	0	0	0	0	1
Europe	ROU_4	2880	886	1094	3219	2023	1741	2308	438	2081	1991	2590	1412	2378	1167	1611	2083	2083	1612	2378	1167	1414	2590	1991	2079	2307	438	1742	2023	1	1	0	0	0	0	0	0
Europe	ROU_5	2878	891	1095	3216	2023	1743	2307	441	2079	1991	2585	1413	2379	1167	1611	2083	2084	1613	2377	1167	1414	2586	1992	2079	2307	441	1744	2021	7	0	0	0	0	0	0	1
Europe	ROU_6	2849	888	1094	3217	2024	1738	2308	442	2079	1991	2590	1412	2376	1168	1611	2083	1713	1658	2775	1019	1883	1912	2117	1737	2714	1083	1798	1631	2	0	1	0	0	0	0	0
Europe	ROU_8	2883	887	1095	3218	2023	1741	2305	438	2080	1993	2592	1411	2375	1167	1611	2083	1618	1812	2797	1023	1708	1756	1629	1771	2859	998	1707	1660	2	0	1	0	0	0	0	0
Europe	ROU_9	2845	881	1092	3212	2021	1734	2302	437	2074	1990	2589	1407	2369	1165	1605	2082	1649	1727	2861	1222	1648	2061	1825	1827	2910	1042	1670	1658	7	0	0	0	0	0	0	1
Europe	RUS_10	2830	878	1085	3199	2002	1730	2293	425	2056	1970	2572	1388	2359	1156	1602	2065	1610	1738	2836	1155	1648	2074	1904	1812	2847	1036	1680	1676	7	0	0	0	0	0	0	1
Europe	RUS_19	2835	876	1086	3208	2019	1728	2293	442	2073	1984	2580	1408	2362	1162	1604	2074	1636	1763	2820	1173	1695	2030	1819	1815	2910	1048	1670	1635	2	0	1	0	0	0	0	0
Europe	RUS_2	2836	877	1085	3206	2019	1729	2294	439	2072	1984	2581	1408	2361	1162	1603	2078	1635	1763	2820	1173	1695	2028	1817	1816	2911	1049	1671	1635	7	0	0	0	0	0	0	1
Europe	RUS_22	2487	757	946	2931	1787	1519	2052	377	1848	1783	2299	1241	2142	1004	1407	1806	1415	1541	2554	1024	1531	1799	1627	1622	2629	910	1479	1387	2	0	1	0	0	0	0	0
Europe	RUS_24	2844	883	1092	3216	2020	1739	2305	438	2080	1989	2591	1410	2373	1168	1611	2080	1561	1762	2949	1025	1854	1834	2039	1729	2862	1193	1796	1612	2	0	1	0	0	0	0	0
Europe	RUS_25	2849	884	1089	3215	2022	1739	2305	439	2079	1989	2590	1410	2373	1168	1611	2082	1631	1775	2850	1108	1756	1704	1678	1734	2896	1111	1747	1617	7	0	0	0	0	0	0	1
Europe	RUS_28	2842	883	1092	3218	2019	1740	2306	438	2079	1989	2590	1409	2375	1168	1611	2079	1584	1819	2881	1149	1753	2007	1855	1832	2945	1103	1709	1627	7	0	0	0	0	0	0	1
Europe	RUS_29	2845	883	1089	3215	2021	1739	2305	439	2080	1989	2590	1410	2374	1168	1611	2080	1585	1819	2880	1148	1752	2007	1853	1833	2947	1103	1709	1628	7	0	0	0	0	0	0	1
Europe	RUS_30	2836	876	1085	3205	2016	1729	2295	438	2071	1983	2581	1406	2362	1162	1603	2076	1620	1755	2846	1077	1683	1683	1692	1734	2786	1052	1783	1651	7	0	0	0	0	0	0	1
Europe	RUS_36	2836	876	1085	3206	2018	1729	2295	439	2073	1984	2581	1408	2363	1162	1603	2076	1635	1763	2820	1173	1696	2029	1817	1816	2911	1048	1671	1635	7	0	0	0	0	0	0	1
Europe	RUS_38	2842	884	1092	3217	2019	1740	2306	438	2079	1989	2590	1409	2375	1168	1611	2079	1584	1819	2881	1149	1753	2007	1855	1833	2945	1103	1709	1627	1	1	0	0	0	0	0	0
Europe	RUS_42	2848	887	1095	3221	2023	1741	2307	438	2079	1991	2591	1410	2376	1168	1611	2084	2084	1612	2377	1168	1413	2590	1991	2078	2307	438	1741	2023	7	0	0	0	0	0	0	1
Europe	RUS_7	2838	876	1085	3207	2019	1728	2294	438	2074	1984	2580	1409	2363	1161	1601	2077	1635	1762	2821	1173	1695	2029	1816	1816	2911	1048	1672	1635	7	0	0	0	0	0	0	1
Europe	RUS_9	2835	878	1086	3207	2019	1726	2295	440	2072	1983	2580	1408	2362	1161	1602	2076	1630	1762	2813	1175	1702	2027	1818	1823	2901	1040	1683	1618	2	0	1	0	0	0	0	0
Europe	SVK_1	2880	887	1093	3218	2022	1740	2309	438	2080	1991	2591	1411	2378	1168	1610	2083	1630	1798	2715	1081	1739	2115	1911	1880	2774	1019	1657	1713	7	0	0	0	0	0	0	1
Europe	SWE_1	2863	885	1094	3220	2021	1740	2311	438	2079	1992	2590	1414	2378	1166	1610	2084	2084	1611	2378	1167	1416	2590	1991	2078	2307	438	1742	2023	2	0	1	0	0	0	0	0
Europe	UKR_1	2829	876	1087	3199	2013	1733	2301	436	2067	1982	2580	1402	2368	1164	1604	2074	1615	1717	2865	1001	1832	1844	2065	1665	2801	1150	1791	1608	7	0	0	0	0	0	0	1
Europe	UKR_2	2875	886	1091	3220	2024	1741	2305	439	2079	1993	2590	1411	2376	1166	1611	2083	1630	1797	2715	1083	1737	2115	1910	1879	2775	1019	1658	1713	3	0	0	1	0	0	0	0
Europe	UKR_3	2845	881	1087	3222	2021	1739	2306	438	2079	1988	2590	1409	2374	1168	1611	2082	1604	1718	2903	1112	1701	1705	1762	1749	2787	1056	1834	1605	2	0	1	0	0	0	0	0
Europe	UKR_4	2848	883	1088	3219	2022	1740	2305	437	2079	1989	2590	1409	2374	1167	1611	2082	1630	1774	2852	1108	1756	1705	1678	1732	2896	1111	1747	1617	7	0	0	0	0	0	0	1
Europe	UKR_5	2853	887	1090	3222	2024	1741	2306	440	2080	1989	2586	1412	2377	1168	1611	2084	1673	1791	2854	1188	1674	2134	1859	1811	2989	1050	1659	1673	6	0	0	0	0	0	1	0
Europe	UKR_7	2848	881	1089	3219	2020	1739	2304	437	2081	1989	2591	1408	2375	1168	1610	2078	1605	1719	2900	1112	1701	1706	1763	1748	2788	1055	1833	1606	1	1	0	0	0	0	0	0
North America	CAN_10	2849	885	1093	3220	2015	1741	2311	436	2078	1993	2592	1411	2382	1164	1610	2075	1628	1796	2717	1082	1738	2117	1912	1874	2773	1016	1656	1712	4	0	0	0	1	0	0	0
North America	CAN_14	2846	884	1091	3215	2020	1737	2306	438	2077	1989	2589	1409	2374	1168	1607	2081	1654	1728	2862	1223	1648	2065	1826	1828	2915	1043	1670	1658	7	0	0	0	0	0	0	1
North America	CAN_8	2846	884	1091	3215	2020	1738	2306	438	2079	1990	2589	1410	2376	1168	1607	2082	1586	1773	2937	1079	1815	1863	1991	1721	2896	1174	1807	1593	4	0	0	0	1	0	0	0
North America	CRI_1	2839	878	1092	3211	2016	1736	2302	437	2075	1988	2588	1407	2370	1167	1606	2077	1588	1814	2778	1140	1712	2089	1841	1860	2869	1025	1675	1634	3	0	0	1	0	0	0	0
North America	CRI_10	2845	883	1093	3217	2021	1739	2304	438	2079	1992	2590	1411	2373	1168	1608	2083	1617	1785	2789	1085	1781	1707	1666	1794	2811	1054	1772	1605	6	0	0	0	0	0	1	0
North America	CRI_12	2841	879	1088	3213	2017	1735	2303	439	2075	1987	2586	1407	2372	1167	1606	2077	1589	1722	2920	987	1801	1872	2067	1706	2809	1147	1757	1665	7	0	0	0	0	0	0	1
North America	CRI_13	2845	880	1092	3211	2021	1736	2301	438	2077	1989	2588	1409	2370	1167	1607	2081	1615	1785	2786	1085	1778	1704	1660	1792	2810	1053	1771	1604	7	0	0	0	0	0	0	1
North America	CRI_15	2746	853	1058	3108	1960	1674	2251	429	2010	1923	2513	1369	2298	1136	1558	2028	1563	1705	2736	1055	1691	1637	1602	1695	2743	1034	1708	1557	3	0	0	1	0	0	0	0
North America	CRI_16	2801	872	1082	3159	1985	1717	2279	429	2044	1961	2557	1386	2343	1148	1590	2047	1616	1745	2745	1132	1681	2072	1880	1802	2813	987	1697	1595	7	0	0	0	0	0	0	1
North America	CRI_17	2753	848	1064	3132	1964	1681	2248	423	2016	1935	2527	1371	2302	1133	1564	2026	1564	1703	2747	1063	1695	1639	1609	1695	2744	1028	1707	1561	3	0	0	1	0	0	0	0
North America	CRI_18	2820	876	1091	3199	2001	1730	2293	436	2066	1976	2578	1401	2357	1163	1601	2064	1627	1758	2777	1145	1696	2088	1894	1820	2830	996	1705	1611	7	0	0	0	0	0	0	1
North America	CRI_19	2845	883	1092	3213	2021	1737	2304	438	2079	1988	2586	1411	2375	1167	1606	2081	1624	1756	2870	1184	1713	2030	1874	1846	2887	1043	1743	1618	3	0	0	1	0	0	0	0
North America	CRI_2	2747	849	1065	3117	1962	1673	2242	426	2013	1928	2519	1368	2293	1136	1557	2029	1636	1712	2767	1112	1684	1990	1832	1791	2798	978	1684	1614	3	0	0	1	0	0	0	0
North America	CRI_20	2869	882	1092	3207	2020	1735	2301	438	2076	1987	2586	1411	2368	1165	1607	2082	1669	1737	2846	1060	1733	1715	1677	1762	2862	1006	1757	1650	3	0	0	1	0	0	0	0
North America	CRI_22	2834	879	1080	3208	2005	1729	2293	434	2067	1975	2571	1401	2363	1158	1603	2063	1611	1716	2866	982	1875	1822	2053	1661	2839	1181	1752	1610	3	0	0	1	0	0	0	0
North America	CRI_23	2722	835	1045	3090	1947	1657	2220	422	1984	1905	2494	1353	2270	1117	1544	2008	1537	1680	2718	1050	1677	1621	1589	1685	2722	1019	1693	1543	3	0	0	1	0	0	0	0
North America	CRI_24	2568	792	1011	2882	1854	1584	2094	412	1919	1823	2392	1295	2145	1100	1467	1919	1491	1607	2579	1006	1598	1519	1530	1587	2557	985	1628	1468	2	0	1	0	0	0	0	0
North America	CRI_25	2703	845	1041	3084	1938	1663	2218	425	1996	1904	2491	1354	2270	1124	1544	2001	1545	1681	2718	1047	1677	1622	1591	1681	2713	1019	1695	1542	3	0	0	1	0	0	0	0
North America	CRI_26	2738	845	1060	3097	1951	1662	2229	427	2000	1915	2500	1355	2287	1132	1540	2012	1622	1700	2751	1109	1680	1979	1817	1782	2788	977	1676	1608	3	0	0	1	0	0	0	0
North America	CRI_27	2822	876	1087	3197	2001	1727	2294	435	2066	1972	2574	1401	2357	1161	1603	2061	1624	1758	2770	1141	1697	2087	1889	1820	2831	995	1707	1611	3	0	0	1	0	0	0	0
North America	CRI_28	2839	878	1091	3208	2016	1736	2302	437	2075	1988	2587	1408	2371	1167	1605	2078	1583	1763	2799	1137	1715	2079	1878	1837	2869	1013	1682	1593	6	0	0	0	0	0	1	0
North America	CRI_29	2844	883	1092	3210	2020	1737	2303	438	2077	1989	2587	1411	2372	1167	1606	2082	1599	1750	2971	1075	1833	1865	2015	1763	2886	1154	1820	1611	6	0	0	0	0	0	1	0
North America	CRI_30	2816	874	1088	3195	1999	1725	2278	435	2062	1973	2568	1395	2354	1159	1592	2061	1625	1754	2769	1142	1690	2085	1890	1815	2826	994	1700	1608	3	0	0	1	0	0	0	0
North America	CRI_32	2846	880	1092	3207	2021	1737	2303	437	2078	1990	2587	1408	2375	1166	1605	2080	1620	1835	2772	1183	1717	2046	1786	1860	2883	1034	1724	1623	3	0	0	1	0	0	0	0
North America	CRI_33	2847	883	1086	3209	2021	1737	2305	439	2078	1992	2591	1412	2372	1168	1607	2084	1539	1756	2858	1028	1877	1787	1975	1717	2827	1198	1776	1550	3	0	0	1	0	0	0	0
North America	CRI_34	2839	880	1090	3209	2017	1738	2300	436	2076	1988	2587	1407	2371	1167	1606	2078	1584	1762	2799	1138	1714	2079	1878	1838	2869	1013	1682	1593	6	0	0	0	0	0	1	0
North America	CRI_35	2828	877	1090	3201	2009	1732	2297	437	2071	1979	2581	1403	2364	1164	1605	2068	1631	1761	2778	1144	1700	2090	1895	1821	2840	997	1709	1615	3	0	0	1	0	0	0	0
North America	CRI_36	2844	883	1091	3213	2018	1736	2307	438	2077	1989	2589	1410	2373	1167	1607	2081	1607	1777	2894	1196	1677	2029	1841	1864	2887	1048	1737	1651	3	0	0	1	0	0	0	0
North America	CRI_37	2839	878	1091	3206	2016	1736	2302	437	2075	1988	2587	1408	2371	1167	1605	2078	1596	1711	2903	1043	1856	1834	2042	1678	2866	1183	1775	1568	3	0	0	1	0	0	0	0
North America	CRI_38	2664	825	1048	3018	1919	1634	2180	419	1970	1888	2475	1339	2226	1108	1527	1982	1540	1667	2664	1036	1653	1596	1578	1646	2660	1014	1673	1524	3	0	0	1	0	0	0	0
North America	CRI_39	2839	877	1090	3210	2009	1736	2300	436	2069	1984	2579	1408	2368	1161	1605	2074	1617	1725	2874	983	1877	1830	2064	1662	2841	1181	1759	1618	3	0	0	1	0	0	0	0
North America	CRI_5	2857	881	1094	3218	2019	1740	2306	437	2077	1990	2593	1408	2373	1170	1610	2083	1591	1727	2928	989	1801	1875	2074	1707	2823	1150	1760	1671	7	0	0	0	0	0	0	1
North America	CRI_6	2841	881	1092	3220	2014	1739	2309	436	2077	1990	2592	1408	2376	1167	1609	2077	1680	1753	2839	1146	1738	2045	1890	1834	2882	1010	1731	1653	7	0	0	0	0	0	0	1
North America	CRI_7	2842	881	1091	3212	2021	1736	2303	438	2077	1991	2586	1408	2376	1164	1606	2078	1569	1727	2859	1037	1836	1810	2065	1633	2796	1251	1769	1590	3	0	0	1	0	0	0	0
North America	CRI_8	2844	883	1092	3216	2021	1737	2304	438	2079	1989	2590	1410	2372	1168	1608	2082	1653	1729	2863	1223	1648	2063	1826	1828	2913	1044	1670	1658	7	0	0	0	0	0	0	1
North America	CRI_9	2731	842	1067	3100	1949	1667	2223	426	2012	1921	2511	1363	2280	1133	1552	2012	1566	1691	2719	1057	1680	1629	1601	1678	2733	1032	1698	1537	3	0	0	1	0	0	0	0
North America	DOM_1	1782	659	787	1947	1376	1174	1424	333	1428	1364	1806	954	1454	874	1083	1440	1185	1212	1902	709	1219	1223	1432	1220	1802	800	1168	1108	6	0	0	0	0	0	1	0
North America	GLP_4	2842	883	1092	3217	2018	1739	2306	438	2079	1989	2589	1409	2376	1168	1608	2079	1603	1719	2903	1111	1699	1705	1765	1749	2784	1056	1832	1604	3	0	0	1	0	0	0	0
North America	GLP_5	2840	880	1090	3208	2015	1736	2303	437	2072	1988	2586	1407	2370	1166	1605	2078	1652	1736	2822	1189	1692	2045	1857	1826	2869	1007	1727	1614	7	0	0	0	0	0	0	1
North America	GLP_6	2845	884	1088	3216	2021	1743	2306	439	2079	1991	2590	1410	2376	1168	1613	2082	1652	1801	2902	1040	1710	1696	1703	1746	2856	1054	1793	1707	4	0	0	0	1	0	0	0
North America	GLP_7	2843	882	1091	3210	2019	1737	2302	437	2077	1988	2588	1409	2370	1167	1607	2080	1628	1776	2846	1107	1755	1703	1675	1733	2890	1108	1746	1614	3	0	0	1	0	0	0	0
North America	MEX_1	2789	868	1076	3162	1984	1705	2260	432	2035	1946	2538	1375	2327	1149	1580	2040	1619	1705	2783	1171	1660	1999	1818	1793	2813	990	1702	1582	7	0	0	0	0	0	0	1
North America	MEX_10	2849	886	1086	3224	2018	1739	2312	439	2077	1992	2590	1410	2380	1167	1609	2079	2079	1609	2380	1167	1414	2590	1991	2075	2306	439	1743	2022	1	1	0	0	0	0	0	0
North America	MEX_11	2764	869	1078	3139	1976	1694	2254	434	2033	1943	2537	1374	2316	1154	1569	2038	1588	1759	2793	990	1775	1856	1984	1612	2816	1160	1707	1597	2	0	1	0	0	0	0	0
North America	MEX_12	2751	858	1062	3128	1960	1693	2223	427	2022	1929	2507	1361	2303	1140	1557	2014	1594	1721	2707	1119	1662	2035	1846	1767	2764	980	1660	1572	2	0	1	0	0	0	0	0
North America	MEX_13	2761	862	1065	3140	1959	1698	2230	426	2029	1940	2515	1376	2307	1135	1562	2016	1606	1721	2712	1129	1663	2049	1856	1777	2775	975	1665	1569	2	0	1	0	0	0	0	0
North America	MEX_16	2818	875	1086	3190	1999	1720	2282	435	2060	1963	2561	1396	2348	1157	1595	2056	1607	1770	2836	998	1789	1882	2013	1623	2856	1171	1727	1623	2	0	1	0	0	0	0	0
North America	MEX_17	2846	886	1093	3219	2022	1736	2305	440	2079	1991	2588	1413	2375	1166	1607	2081	1627	1758	2869	1185	1715	2032	1877	1847	2885	1043	1746	1619	2	0	1	0	0	0	0	0
North America	MEX_18	2856	888	1090	3223	2024	1739	2303	437	2079	1989	2592	1405	2374	1168	1611	2082	1610	1811	2913	1159	1621	2061	1826	1792	2976	1029	1709	1656	7	0	0	0	0	0	0	1
North America	MEX_19	2864	886	1094	3222	2021	1740	2306	436	2083	1992	2590	1412	2380	1165	1608	2080	2021	1742	2309	437	2085	1991	2589	1410	2375	1168	1608	2084	3	0	0	1	0	0	0	0
North America	MEX_2	2846	886	1092	3225	2021	1736	2311	438	2078	1991	2587	1411	2382	1164	1606	2079	1630	1795	2715	1080	1741	2117	1908	1878	2772	1017	1655	1712	6	0	0	0	0	0	1	0
North America	MEX_20	2781	872	1072	3155	1985	1702	2240	429	2038	1956	2537	1375	2321	1141	1572	2034	1615	1735	2720	1127	1677	2056	1864	1791	2787	979	1682	1591	2	0	1	0	0	0	0	0
North America	MEX_21	2848	886	1089	3217	2023	1740	2303	440	2079	1989	2587	1412	2373	1168	1610	2084	1602	1749	2972	1075	1835	1866	2017	1765	2890	1156	1821	1613	2	0	1	0	0	0	0	0
North America	MEX_23	2835	881	1081	3197	2012	1731	2294	437	2066	1987	2580	1402	2364	1159	1601	2072	1598	1708	2883	1107	1693	1697	1755	1742	2776	1050	1827	1599	2	0	1	0	0	0	0	0
North America	MEX_24	2811	874	1081	3183	2001	1719	2288	438	2047	1972	2566	1390	2351	1157	1593	2062	1635	1721	2803	1182	1675	2020	1838	1807	2843	1000	1715	1596	7	0	0	0	0	0	0	1
North America	MEX_25	2848	887	1094	3222	2023	1738	2306	436	2079	1992	2591	1408	2377	1167	1606	2083	2082	1607	2378	1168	1413	2590	1991	2078	2306	437	1739	2022	1	1	0	0	0	0	0	0
North America	MEX_28	2851	885	1093	3218	2022	1742	2308	439	2080	1993	2590	1414	2377	1167	1611	2084	2084	1612	2378	1168	1415	2589	1991	2079	2307	439	1742	2023	1	1	0	0	0	0	0	0
North America	MEX_3	2840	882	1093	3215	2018	1736	2304	438	2077	1989	2591	1409	2369	1168	1608	2080	1624	1790	2861	1011	1802	1902	2027	1641	2886	1179	1742	1638	2	0	1	0	0	0	0	0
North America	MEX_31	2843	880	1089	3209	2017	1730	2307	439	2076	1986	2588	1407	2372	1168	1604	2078	1605	1718	2897	1107	1697	1702	1761	1744	2779	1057	1829	1604	2	0	1	0	0	0	0	0
North America	MEX_32	2843	884	1086	3214	2022	1737	2303	441	2077	1989	2586	1410	2372	1167	1608	2080	1586	1816	2878	1146	1752	2004	1851	1833	2945	1103	1708	1625	2	0	1	0	0	0	0	0
North America	MEX_33	2853	885	1092	3220	2023	1740	2307	440	2081	1991	2589	1412	2379	1169	1609	2083	2023	1741	2308	440	2083	1990	2587	1411	2377	1169	1611	2083	3	0	0	1	0	0	0	0
North America	MEX_34	2841	883	1092	3224	2014	1738	2308	435	2075	1991	2587	1409	2378	1164	1604	2077	0	3	2	0	12	3	0	0	0	0	3	0	2	0	1	0	0	0	0	0
North America	MEX_36	2832	878	1091	3201	2010	1735	2298	437	2073	1984	2582	1407	2365	1166	1604	2074	1633	1761	2778	1147	1700	2090	1897	1821	2841	1002	1709	1616	2	0	1	0	0	0	0	0
North America	MEX_39	2845	886	1092	3215	2021	1737	2307	439	2080	1990	2589	1413	2374	1168	1607	2083	1693	1718	2854	1045	1840	1898	2075	1675	2838	1149	1792	1633	2	0	1	0	0	0	0	0
North America	MEX_4	2867	888	1098	3222	2024	1740	2306	438	2079	1991	2590	1410	2376	1167	1610	2084	2084	1612	2377	1167	1414	2590	1991	2079	2307	438	1739	2023	1	1	0	0	0	0	0	0
North America	MEX_41	2845	888	1092	3214	2021	1736	2306	437	2076	1989	2587	1410	2375	1165	1606	2082	1601	1734	2900	1175	1681	2006	1887	1852	2844	1021	1771	1621	3	0	0	1	0	0	0	0
North America	MEX_42	2770	870	1068	3154	1968	1695	2271	434	2036	1944	2529	1394	2328	1145	1571	2034	1591	1741	2799	992	1770	1861	1984	1617	2829	1163	1697	1601	2	0	1	0	0	0	0	0
North America	MEX_43	2723	849	1046	3091	1935	1663	2204	428	2009	1903	2478	1365	2273	1126	1539	1989	1580	1696	2683	1105	1645	2009	1829	1759	2740	967	1650	1549	2	0	1	0	0	0	0	0
North America	MEX_44	2850	888	1091	3219	2024	1741	2304	439	2079	1991	2589	1410	2375	1168	1610	2084	1631	1796	2713	1083	1737	2115	1910	1881	2774	1019	1657	1712	6	0	0	0	0	0	1	0
North America	MEX_46	2746	850	1058	3106	1958	1680	2206	428	2010	1922	2497	1357	2282	1132	1550	2010	1575	1729	2756	980	1746	1831	1958	1582	2785	1142	1683	1586	2	0	1	0	0	0	0	0
North America	MEX_47	2828	884	1090	3191	2013	1730	2294	439	2073	1978	2576	1405	2364	1164	1604	2069	1555	1721	2808	1070	1707	1695	1676	1744	2790	1081	1690	1602	2	0	1	0	0	0	0	0
North America	MEX_48	2843	883	1091	3224	2017	1737	2310	437	2080	1989	2590	1412	2378	1167	1608	2080	1624	1757	2874	1185	1715	2031	1874	1844	2886	1043	1744	1620	2	0	1	0	0	0	0	0
North America	MEX_5	2591	821	1025	2980	1879	1599	2119	412	1941	1846	2407	1297	2198	1100	1473	1924	1538	1637	2559	1080	1592	1954	1773	1697	2625	942	1580	1497	2	0	1	0	0	0	0	0
North America	MEX_51	2832	885	1086	3200	2016	1732	2289	433	2071	1982	2579	1401	2363	1162	1599	2073	1592	1732	2881	1168	1677	2000	1879	1846	2832	1018	1762	1611	2	0	1	0	0	0	0	0
North America	MEX_52	2837	884	1087	3204	2016	1736	2294	436	2073	1987	2580	1403	2368	1165	1603	2076	1619	1832	2763	1181	1717	2041	1784	1855	2879	1033	1721	1615	2	0	1	0	0	0	0	0
North America	MEX_53	2835	880	1091	3213	2013	1738	2303	435	2082	1985	2585	1412	2373	1165	1607	2074	1604	1808	2914	1158	1616	2061	1822	1788	2966	1024	1704	1650	7	0	0	0	0	0	0	1
North America	MEX_54	2795	864	1072	3148	1983	1701	2252	436	2032	1943	2530	1381	2315	1146	1578	2043	1570	1691	2835	1082	1673	1666	1729	1715	2738	1038	1789	1576	2	0	1	0	0	0	0	0
North America	MEX_55	2812	872	1083	3194	2002	1723	2286	437	2052	1975	2567	1389	2357	1160	1592	2061	1638	1723	2807	1181	1679	2023	1842	1806	2842	1000	1717	1598	7	0	0	0	0	0	0	1
North America	MEX_56	2846	885	1094	3217	2021	1738	2307	437	2081	1988	2590	1412	2374	1168	1608	2082	1619	1810	2796	1023	1709	1758	1626	1771	2860	996	1704	1658	3	0	0	1	0	0	0	0
North America	MEX_57	2845	885	1092	3216	2021	1740	2306	439	2080	1993	2589	1414	2375	1167	1608	2083	1615	1810	2800	1023	1707	1754	1626	1771	2859	999	1705	1658	3	0	0	1	0	0	0	0
North America	MEX_59	2846	881	1093	3222	2020	1738	2304	437	2080	1991	2590	1407	2378	1168	1606	2078	1616	1784	2791	1086	1782	1709	1664	1793	2811	1050	1773	1604	2	0	1	0	0	0	0	0
North America	MEX_6	2754	861	1072	3103	1957	1688	2237	427	2001	1952	2532	1350	2308	1140	1555	2018	1601	1692	2743	1161	1637	1984	1812	1766	2783	984	1684	1565	7	0	0	0	0	0	0	1
North America	MEX_61	2769	867	1067	3153	1972	1702	2235	428	2030	1944	2522	1370	2317	1139	1568	2023	1608	1727	2715	1126	1668	2055	1858	1783	2787	980	1668	1575	2	0	1	0	0	0	0	0
North America	MEX_62	2852	887	1088	3227	2026	1740	2305	440	2078	1992	2588	1410	2378	1166	1610	2084	0	1	1	0	6	5	0	3	0	1	2	1	2	0	1	0	0	0	0	0
North America	MEX_8	2839	882	1091	3218	2018	1738	2304	439	2077	1988	2589	1407	2372	1169	1609	2079	1640	1764	2785	1151	1708	2096	1899	1827	2852	1003	1711	1618	2	0	1	0	0	0	0	0
North America	MEX_9	2828	880	1092	3201	2010	1734	2300	437	2077	1984	2585	1410	2365	1164	1607	2071	1619	1788	2853	1007	1797	1899	2024	1639	2877	1174	1737	1631	2	0	1	0	0	0	0	0
North America	PAN_1	2798	864	1074	3166	1979	1699	2269	423	2035	1961	2551	1380	2334	1137	1575	2037	1595	1769	2693	1032	1741	1738	1642	1744	2798	1018	1688	1594	6	0	0	0	0	0	1	0
North America	PAN_10	2634	816	1023	2958	1883	1603	2112	398	1918	1869	2421	1291	2195	1074	1485	1926	1500	1675	2529	979	1645	1624	1565	1645	2636	982	1604	1500	3	0	0	1	0	0	0	0
North America	PAN_100	2779	853	1068	3158	1974	1690	2258	419	2028	1955	2543	1374	2325	1133	1567	2030	1583	1766	2686	1030	1733	1735	1636	1738	2785	1014	1680	1583	7	0	0	0	0	0	0	1
North America	PAN_102	2717	839	1038	3079	1926	1656	2217	404	1988	1902	2491	1346	2269	1109	1539	1989	1555	1690	2716	976	1635	1693	1690	1692	2696	966	1704	1606	3	0	0	1	0	0	0	0
North America	PAN_105	2485	773	955	2807	1793	1523	2018	378	1825	1773	2299	1231	2089	1028	1398	1847	1470	1521	2464	1010	1491	1807	1659	1625	2516	873	1524	1467	3	0	0	1	0	0	0	0
North America	PAN_107	2592	807	987	2911	1853	1582	2096	385	1898	1813	2365	1277	2165	1065	1457	1906	1486	1595	2579	935	1542	1598	1605	1624	2580	916	1625	1525	3	0	0	1	0	0	0	0
North America	PAN_108	2670	837	1030	3016	1886	1619	2170	397	1948	1871	2443	1306	2238	1092	1499	1943	1515	1592	2725	1021	1683	1773	1873	1586	2782	1097	1625	1469	3	0	0	1	0	0	0	0
North America	PAN_112	2733	851	1059	3114	1944	1667	2238	403	2002	1923	2515	1352	2296	1116	1544	2006	1564	1694	2720	984	1647	1628	1690	1678	2657	1005	1730	1616	3	0	0	1	0	0	0	0
North America	PAN_113	2587	808	1004	2911	1840	1569	2118	391	1888	1813	2376	1286	2157	1069	1460	1908	1521	1586	2566	1030	1550	1863	1721	1687	2627	909	1560	1511	3	0	0	1	0	0	0	0
North America	PAN_114	2715	844	1049	3116	1934	1640	2222	412	1988	1905	2482	1345	2287	1114	1515	1991	1607	1561	2703	1020	1636	1650	1682	1628	2694	1005	1629	1573	3	0	0	1	0	0	0	0
North America	PAN_116	2789	866	1072	3159	1979	1696	2261	424	2029	1957	2548	1374	2325	1138	1572	2038	1594	1767	2687	1031	1740	1731	1641	1743	2792	1020	1687	1588	7	0	0	0	0	0	0	1
North America	PAN_117	2533	776	982	2876	1790	1546	2083	391	1860	1781	2331	1267	2120	1048	1429	1867	1452	1605	2481	1019	1558	1868	1717	1679	2568	936	1555	1486	2	0	1	0	0	0	0	0
North America	PAN_119	2785	862	1073	3173	1979	1691	2265	423	2031	1961	2549	1377	2331	1134	1568	2035	1590	1768	2691	1030	1738	1735	1639	1739	2790	1020	1683	1586	7	0	0	0	0	0	0	1
North America	PAN_122	2798	863	1072	3169	1982	1697	2263	423	2035	1960	2551	1375	2330	1138	1574	2037	1594	1767	2693	1031	1740	1735	1642	1740	2798	1020	1687	1593	7	0	0	0	0	0	0	1
North America	PAN_124	2704	847	1055	3076	1941	1649	2209	416	1988	1912	2492	1339	2279	1114	1527	1989	1557	1720	2617	1011	1701	1691	1606	1700	2721	1000	1644	1542	3	0	0	1	0	0	0	0
North America	PAN_125	2732	850	1052	3119	1945	1654	2225	421	1998	1922	2494	1359	2291	1120	1529	2003	1568	1749	2638	1003	1716	1695	1602	1717	2734	998	1660	1554	3	0	0	1	0	0	0	0
North America	PAN_128	2680	848	1045	3051	1913	1636	2172	406	1969	1886	2459	1324	2242	1100	1513	1962	1499	1731	2679	1094	1592	1990	1740	1761	2764	985	1583	1560	3	0	0	1	0	0	0	0
North America	PAN_130	2769	852	1061	3142	1960	1677	2259	410	2017	1938	2535	1363	2319	1124	1557	2019	1610	1702	2748	1104	1643	2001	1819	1788	2812	968	1657	1622	3	0	0	1	0	0	0	0
North America	PAN_131	2777	863	1072	3163	1972	1691	2265	423	2029	1960	2547	1377	2328	1133	1569	2032	1539	1751	2817	1117	1621	2002	1852	1818	2781	1024	1685	1644	3	0	0	1	0	0	0	0
North America	PAN_133	2231	724	909	2553	1614	1377	1837	340	1679	1592	2118	1131	1861	949	1300	1667	1299	1417	2231	847	1378	1427	1421	1448	2254	815	1412	1321	3	0	0	1	0	0	0	0
North America	PAN_134	2604	805	998	2965	1861	1584	2121	392	1918	1841	2400	1285	2193	1081	1461	1913	1504	1617	2621	940	1571	1627	1624	1634	2596	921	1631	1533	3	0	0	1	0	0	0	0
North America	PAN_136	2682	835	1038	3055	1909	1616	2184	407	1973	1880	2456	1339	2241	1102	1494	1966	1532	1699	2595	989	1675	1673	1590	1698	2680	990	1624	1538	3	0	0	1	0	0	0	0
North America	PAN_137	2768	852	1056	3124	1956	1670	2243	408	2013	1921	2519	1353	2304	1127	1546	2017	1612	1689	2732	1102	1635	1993	1808	1784	2796	963	1656	1622	3	0	0	1	0	0	0	0
North America	PAN_139	2629	820	1010	2972	1884	1598	2134	394	1929	1843	2406	1291	2205	1080	1482	1928	1549	1607	2599	1053	1560	1904	1740	1709	2674	927	1592	1550	3	0	0	1	0	0	0	0
North America	PAN_14	2722	837	1039	3081	1929	1652	2214	408	1990	1901	2483	1343	2279	1113	1528	1988	1561	1685	2728	974	1629	1684	1688	1692	2696	961	1708	1603	3	0	0	1	0	0	0	0
North America	PAN_140	2737	840	1054	3113	1945	1655	2220	408	1994	1922	2501	1343	2291	1111	1535	1993	1552	1692	2717	979	1639	1624	1680	1671	2657	1008	1712	1612	3	0	0	1	0	0	0	0
North America	PAN_141	2687	842	1058	3082	1917	1643	2197	416	1980	1906	2483	1348	2258	1110	1523	1978	1542	1716	2624	1011	1702	1680	1611	1705	2717	1001	1633	1533	3	0	0	1	0	0	0	0
North America	PAN_144	2503	791	979	2890	1801	1538	2064	382	1860	1785	2320	1271	2120	1037	1420	1864	1496	1553	2493	1011	1530	1860	1684	1661	2564	884	1509	1485	3	0	0	1	0	0	0	0
North America	PAN_145	2801	868	1075	3173	1983	1705	2270	424	2041	1962	2556	1385	2330	1141	1582	2044	1621	1711	2756	1105	1745	2017	1899	1822	2810	983	1714	1580	3	0	0	1	0	0	0	0
North America	PAN_146	2403	764	974	2753	1746	1477	2010	371	1811	1721	2281	1236	2025	1018	1394	1815	1417	1522	2440	901	1473	1545	1539	1550	2454	875	1499	1436	3	0	0	1	0	0	0	0
North America	PAN_147	2777	861	1063	3137	1963	1681	2255	412	2022	1934	2536	1363	2312	1134	1563	2025	1619	1706	2747	1109	1640	2002	1819	1793	2805	969	1663	1626	3	0	0	1	0	0	0	0
North America	PAN_148	2709	837	1041	3072	1917	1651	2202	403	1985	1902	2488	1339	2263	1108	1532	1978	1552	1692	2712	976	1627	1690	1684	1684	2692	959	1689	1590	3	0	0	1	0	0	0	0
North America	PAN_16	2690	839	1039	3061	1921	1637	2210	404	1974	1887	2467	1339	2264	1105	1518	1983	1546	1671	2709	968	1619	1680	1678	1692	2683	956	1687	1591	3	0	0	1	0	0	0	0
North America	PAN_17	2758	852	1054	3130	1944	1674	2244	409	2010	1924	2514	1363	2304	1121	1551	2008	1607	1689	2736	1100	1635	1988	1807	1781	2792	963	1651	1617	3	0	0	1	0	0	0	0
North America	PAN_19	2725	846	1049	3076	1940	1662	2218	417	1980	1924	2504	1347	2272	1116	1541	2006	1511	1720	2765	1091	1582	1961	1819	1782	2728	1009	1665	1621	3	0	0	1	0	0	0	0
North America	PAN_2	2748	850	1054	3103	1939	1666	2232	410	2000	1915	2511	1352	2287	1124	1548	2006	1605	1691	2719	1095	1624	1981	1804	1774	2784	961	1649	1608	3	0	0	1	0	0	0	0
North America	PAN_23	2759	863	1068	3144	1964	1677	2244	421	2016	1944	2531	1363	2312	1129	1555	2019	1517	1691	2818	1101	1639	1970	1820	1781	2829	1035	1613	1594	3	0	0	1	0	0	0	0
North America	PAN_24	2753	856	1060	3145	1949	1678	2249	416	2015	1940	2523	1367	2314	1124	1553	2010	1522	1758	2761	1118	1636	2043	1797	1812	2845	998	1629	1580	3	0	0	1	0	0	0	0
North America	PAN_25	2756	845	1060	3110	1942	1668	2238	407	2004	1918	2517	1346	2296	1123	1552	2000	1600	1698	2712	1098	1633	1984	1804	1775	2790	957	1648	1607	3	0	0	1	0	0	0	0
North America	PAN_29	2782	863	1074	3153	1978	1695	2251	423	2033	1954	2541	1376	2320	1134	1570	2032	1595	1765	2678	1031	1731	1733	1640	1740	2788	1021	1682	1582	3	0	0	1	0	0	0	0
North America	PAN_3	2386	762	946	2728	1719	1473	1965	361	1778	1703	2238	1207	1998	1004	1367	1785	1426	1489	2378	976	1446	1767	1606	1576	2437	855	1431	1445	3	0	0	1	0	0	0	0
North America	PAN_31	2735	841	1049	3101	1939	1664	2213	404	1993	1927	2506	1339	2285	1111	1537	1991	1584	1688	2702	1086	1625	1978	1803	1770	2765	954	1642	1601	3	0	0	1	0	0	0	0
North America	PAN_32	2628	817	1013	2998	1874	1592	2143	391	1936	1841	2413	1309	2197	1084	1474	1938	1543	1619	2608	1049	1573	1907	1738	1717	2664	935	1592	1549	3	0	0	1	0	0	0	0
North America	PAN_33	2718	841	1041	3095	1928	1650	2223	401	1987	1906	2485	1341	2283	1108	1525	1991	1563	1660	2698	1165	1558	2042	1743	1751	2833	946	1586	1544	3	0	0	1	0	0	0	0
North America	PAN_34	2565	810	1002	2920	1835	1567	2087	384	1891	1826	2374	1288	2143	1059	1435	1905	1427	1624	2599	1006	1548	1852	1729	1673	2667	966	1522	1484	3	0	0	1	0	0	0	0
North America	PAN_36	2736	854	1054	3105	1949	1665	2229	417	1998	1926	2505	1359	2287	1115	1545	2010	1567	1730	2641	1017	1704	1709	1618	1721	2738	1005	1660	1568	3	0	0	1	0	0	0	0
North America	PAN_38	2707	844	1052	3097	1923	1654	2212	418	1989	1913	2494	1342	2278	1123	1529	1980	1553	1724	2632	1003	1703	1700	1608	1703	2728	996	1637	1546	3	0	0	1	0	0	0	0
North America	PAN_39	2773	859	1064	3154	1963	1691	2252	422	2025	1947	2530	1376	2319	1133	1564	2024	1591	1756	2675	1030	1730	1729	1634	1737	2775	1010	1680	1581	3	0	0	1	0	0	0	0
North America	PAN_45	2747	856	1058	3139	1947	1675	2245	416	2006	1936	2515	1365	2307	1121	1548	2011	1586	1694	2709	1107	1651	2005	1864	1734	2778	1013	1647	1576	3	0	0	1	0	0	0	0
North America	PAN_46	2686	830	1031	3040	1905	1632	2188	400	1953	1879	2458	1318	2240	1096	1519	1966	1569	1610	2705	965	1719	1739	1906	1563	2745	1057	1679	1503	3	0	0	1	0	0	0	0
North America	PAN_47	2751	858	1064	3140	1966	1677	2244	418	2011	1946	2533	1365	2302	1129	1555	2027	1605	1724	2764	1114	1634	1964	1836	1777	2749	995	1709	1626	3	0	0	1	0	0	0	0
North America	PAN_49	2800	866	1071	3163	1978	1699	2263	417	2033	1954	2551	1374	2326	1134	1579	2037	1606	1735	2795	1069	1659	2018	1839	1808	2846	967	1657	1662	2	0	1	0	0	0	0	0
North America	PAN_51	2582	812	1008	2970	1852	1587	2121	387	1921	1828	2396	1294	2183	1072	1471	1910	1543	1603	2585	1041	1556	1896	1732	1696	2646	910	1555	1531	3	0	0	1	0	0	0	0
North America	PAN_53	2711	851	1054	3120	1938	1659	2212	409	1997	1914	2497	1350	2279	1109	1534	1989	1555	1729	2639	1008	1702	1701	1613	1714	2732	1004	1646	1552	3	0	0	1	0	0	0	0
North America	PAN_55	2704	842	1040	3081	1927	1646	2190	403	1983	1909	2485	1332	2268	1100	1525	1977	1594	1604	2656	1047	1672	1622	1643	1647	2674	995	1663	1522	3	0	0	1	0	0	0	0
North America	PAN_57	2315	739	922	2647	1680	1411	1852	351	1724	1665	2179	1147	1913	971	1310	1716	1389	1444	2293	934	1392	1692	1585	1529	2344	830	1397	1386	3	0	0	1	0	0	0	0
North America	PAN_58	2489	783	984	2872	1792	1525	2028	368	1856	1772	2329	1244	2079	1034	1420	1844	1474	1567	2490	998	1514	1824	1661	1642	2532	887	1491	1489	3	0	0	1	0	0	0	0
North America	PAN_59	2496	801	988	2835	1815	1526	2049	381	1844	1762	2322	1243	2097	1042	1421	1872	1448	1576	2452	1029	1530	1837	1694	1686	2526	935	1544	1472	2	0	1	0	0	0	0	0
North America	PAN_6	2786	864	1072	3167	1979	1694	2263	423	2033	1959	2544	1379	2330	1133	1569	2035	1590	1767	2690	1031	1737	1735	1639	1743	2791	1020	1683	1585	7	0	0	0	0	0	0	1
North America	PAN_62	2594	816	1006	2928	1867	1577	2106	393	1895	1820	2383	1268	2170	1066	1470	1911	1474	1588	2591	956	1566	1601	1613	1637	2544	955	1587	1549	3	0	0	1	0	0	0	0
North America	PAN_64	2805	867	1073	3177	1985	1704	2270	422	2040	1961	2556	1383	2334	1138	1583	2045	1601	1772	2700	1035	1744	1739	1645	1748	2801	1022	1692	1598	3	0	0	1	0	0	0	0
North America	PAN_65	2713	832	1043	3060	1927	1645	2204	405	1976	1898	2486	1324	2265	1110	1524	1983	1545	1686	2699	1082	1612	1887	1779	1751	2731	977	1659	1585	3	0	0	1	0	0	0	0
North America	PAN_67	2765	858	1061	3141	1963	1683	2240	411	2016	1941	2525	1360	2314	1121	1559	2016	1567	1697	2811	1134	1599	1994	1776	1810	2839	961	1651	1612	3	0	0	1	0	0	0	0
North America	PAN_68	2770	854	1064	3149	1961	1680	2258	411	2017	1943	2535	1362	2322	1126	1557	2021	1532	1775	2783	1088	1637	2009	1821	1810	2820	1002	1674	1621	3	0	0	1	0	0	0	0
North America	PAN_7	2732	850	1055	3114	1939	1660	2225	415	1981	1930	2506	1342	2289	1115	1533	1997	1559	1697	2777	1111	1651	1983	1846	1808	2763	946	1721	1553	3	0	0	1	0	0	0	0
North America	PAN_70	2422	769	945	2763	1711	1477	1995	362	1789	1725	2259	1217	2033	1018	1364	1787	1413	1507	2418	972	1476	1763	1632	1595	2447	874	1455	1449	3	0	0	1	0	0	0	0
North America	PAN_71	2724	843	1051	3081	1936	1657	2222	409	1990	1906	2501	1338	2280	1117	1545	1991	1558	1695	2709	984	1634	1697	1690	1706	2702	960	1704	1602	3	0	0	1	0	0	0	0
North America	PAN_73	2683	826	1041	3026	1902	1628	2175	399	1951	1874	2455	1303	2240	1097	1510	1953	1521	1686	2613	1092	1631	1955	1780	1777	2692	966	1622	1549	3	0	0	1	0	0	0	0
North America	PAN_79	2664	828	1038	3004	1898	1635	2161	405	1951	1895	2456	1316	2239	1091	1507	1948	1526	1673	2674	1083	1595	1909	1792	1693	2733	1008	1605	1558	2	0	1	0	0	0	0	0
North America	PAN_8	2692	840	1041	3069	1920	1642	2200	414	1975	1909	2483	1340	2260	1109	1528	1972	1534	1700	2715	1129	1609	1943	1757	1748	2777	977	1647	1524	3	0	0	1	0	0	0	0
North America	PAN_81	2725	858	1053	3093	1946	1660	2221	417	1991	1922	2510	1349	2275	1120	1541	2010	1554	1719	2724	1096	1631	1963	1824	1738	2778	1044	1633	1592	2	0	1	0	0	0	0	0
North America	PAN_86	2611	807	1019	2985	1878	1597	2139	398	1928	1856	2425	1298	2199	1079	1489	1927	1555	1621	2610	1053	1563	1907	1747	1706	2664	906	1583	1543	3	0	0	1	0	0	0	0
North America	PAN_87	2768	856	1060	3130	1968	1681	2247	418	2019	1944	2537	1364	2307	1128	1562	2024	1513	1692	2816	1099	1641	1970	1824	1782	2837	1035	1607	1597	3	0	0	1	0	0	0	0
North America	PAN_9	2719	842	1043	3061	1935	1654	2200	405	1987	1897	2486	1336	2260	1116	1532	1996	1547	1628	2790	1035	1707	1793	1902	1621	2821	1111	1658	1510	3	0	0	1	0	0	0	0
North America	PAN_91	2741	848	1059	3145	1946	1667	2243	419	2008	1936	2512	1365	2308	1120	1544	2005	1568	1736	2660	1017	1715	1722	1627	1718	2752	1009	1657	1566	3	0	0	1	0	0	0	0
North America	PAN_93	2655	823	1024	2980	1892	1615	2153	395	1936	1865	2447	1305	2198	1090	1504	1955	1519	1653	2647	958	1590	1639	1653	1666	2643	934	1658	1565	3	0	0	1	0	0	0	0
North America	PAN_94	2778	861	1070	3163	1968	1691	2267	419	2028	1959	2546	1378	2328	1132	1567	2031	1577	1739	2800	1152	1645	2001	1805	1786	2859	999	1689	1575	3	0	0	1	0	0	0	0
North America	PAN_96	2759	854	1060	3140	1963	1672	2244	411	2011	1938	2529	1355	2308	1123	1550	2019	1612	1698	2738	1101	1639	1995	1818	1786	2798	967	1655	1617	3	0	0	1	0	0	0	0
North America	PAN_99	2803	866	1074	3172	1983	1703	2272	423	2041	1961	2555	1384	2334	1140	1582	2043	1601	1772	2697	1035	1741	1739	1645	1747	2800	1022	1692	1596	3	0	0	1	0	0	0	0
North America	Saint Martin_2	2845	887	1093	3216	2022	1741	2304	438	2080	1990	2589	1411	2374	1168	1609	2083	1691	1730	2761	1096	1793	1627	1713	1696	2771	1083	1826	1582	7	0	0	0	0	0	0	1
North America	Saint Martin_3	2835	878	1089	3203	2016	1732	2296	435	2070	1983	2583	1403	2363	1163	1604	2077	1656	1695	2837	1019	1844	1886	2080	1672	2820	1154	1742	1627	3	0	0	1	0	0	0	0
North America	Saint Martin_4	2846	887	1094	3218	2023	1741	2306	438	2080	1991	2590	1411	2376	1168	1611	2083	1672	1792	2855	1189	1673	2133	1861	1810	2988	1049	1658	1671	4	0	0	0	1	0	0	0
North America	USA_1	2839	879	1091	3207	2016	1735	2302	438	2074	1987	2586	1408	2369	1167	1605	2078	1654	1736	2821	1189	1691	2045	1857	1825	2869	1007	1726	1614	7	0	0	0	0	0	0	1
North America	USA_10	2880	886	1094	3219	2021	1741	2311	438	2079	1991	2590	1411	2380	1168	1610	2083	2083	1611	2379	1168	1414	2590	1991	2078	2308	438	1742	2023	1	1	0	0	0	0	0	0
North America	USA_100	2830	876	1090	3201	2011	1736	2298	435	2070	1985	2581	1401	2370	1166	1601	2073	1649	1734	2816	1189	1688	2043	1851	1820	2859	1005	1723	1612	7	0	0	0	0	0	0	1
North America	USA_106	2843	881	1088	3223	2018	1736	2306	439	2079	1987	2587	1411	2373	1168	1607	2079	1642	1767	2832	1176	1700	2037	1819	1817	2917	1052	1677	1641	2	0	1	0	0	0	0	0
North America	USA_11	2842	882	1089	3215	2018	1735	2306	439	2079	1989	2591	1411	2371	1168	1608	2080	1622	1727	2878	983	1882	1833	2069	1669	2844	1185	1761	1615	6	0	0	0	0	0	1	0
North America	USA_111	2879	890	1093	3217	2025	1741	2308	438	2081	1989	2588	1413	2377	1166	1612	2085	2085	1612	2377	1167	1414	2589	1988	2082	2309	439	1742	2023	1	1	0	0	0	0	0	0
North America	USA_114	2862	887	1091	3219	2024	1742	2307	439	2079	1991	2591	1411	2376	1167	1614	2084	1682	1682	2942	1063	1833	1882	2091	1663	2900	1190	1764	1642	6	0	0	0	0	0	1	0
North America	USA_116	2879	887	1093	3215	2022	1744	2308	439	2082	1990	2587	1415	2378	1167	1613	2083	2083	1613	2378	1168	1415	2587	1989	2082	2308	440	1743	2023	1	1	0	0	0	0	0	0
North America	USA_118	2806	860	1071	3174	1984	1720	2281	427	2047	1958	2552	1390	2343	1148	1594	2050	1652	1764	2838	1145	1697	2029	1802	1818	2910	1009	1680	1656	2	0	1	0	0	0	0	0
North America	USA_12	2823	870	1081	3171	1998	1722	2286	434	2050	1973	2566	1391	2351	1159	1593	2063	1589	1700	2910	1043	1793	1839	2008	1699	2845	1162	1743	1626	2	0	1	0	0	0	0	0
North America	USA_121	2803	865	1063	3153	1993	1709	2277	428	2043	1959	2552	1384	2349	1144	1582	2051	1597	1702	2842	971	1855	1804	2023	1638	2815	1167	1744	1591	2	0	1	0	0	0	0	0
North America	USA_122	2818	874	1082	3177	1999	1720	2276	434	2056	1958	2550	1393	2346	1155	1591	2056	1635	1716	2797	1177	1673	2020	1832	1811	2841	996	1713	1599	7	0	0	0	0	0	0	1
North America	USA_123	2842	884	1090	3209	2021	1735	2304	438	2077	1989	2589	1408	2373	1167	1605	2081	1586	1815	2876	1147	1750	2007	1854	1832	2940	1101	1709	1626	2	0	1	0	0	0	0	0
North America	USA_124	2846	883	1093	3219	2020	1740	2308	437	2081	1990	2591	1411	2377	1168	1610	2082	1618	1744	2864	1065	1842	1905	2101	1709	2795	1180	1823	1608	2	0	1	0	0	0	0	0
North America	USA_127	2882	888	1092	3219	2023	1742	2308	439	2077	1992	2589	1410	2378	1168	1610	2085	2084	1612	2377	1168	1413	2590	1992	2078	2308	439	1744	2023	1	1	0	0	0	0	0	0
North America	USA_129	2802	863	1069	3158	1987	1715	2275	431	2041	1957	2544	1385	2346	1148	1587	2047	1594	1724	2760	1074	1716	1655	1647	1710	2765	1055	1740	1586	2	0	1	0	0	0	0	0
North America	USA_13	2880	885	1092	3216	2022	1740	2306	439	2079	1991	2589	1409	2378	1166	1611	2080	1599	1753	2974	1076	1836	1867	2017	1764	2897	1155	1827	1615	7	0	0	0	0	0	0	1
North America	USA_133	2813	872	1086	3189	2007	1722	2286	436	2053	1972	2566	1391	2358	1158	1591	2065	1611	1705	2876	1034	1860	1774	1996	1710	2813	1134	1809	1577	2	0	1	0	0	0	0	0
North America	USA_137	2841	883	1091	3215	2017	1735	2307	438	2076	1988	2589	1409	2373	1167	1607	2079	1609	1754	2803	1086	1738	1673	1653	1738	2811	1071	1749	1602	7	0	0	0	0	0	0	1
North America	USA_139	2823	877	1083	3184	2005	1727	2282	434	2063	1969	2560	1401	2352	1154	1597	2063	1642	1721	2803	1181	1682	2026	1840	1816	2852	999	1713	1604	7	0	0	0	0	0	0	1
North America	USA_14	2841	883	1091	3215	2016	1735	2307	438	2076	1988	2589	1409	2373	1167	1607	2079	1621	1728	2878	984	1883	1831	2066	1668	2845	1185	1762	1615	6	0	0	0	0	0	1	0
North America	USA_140	2880	887	1092	3222	2021	1742	2311	437	2078	1991	2589	1411	2380	1167	1610	2084	2084	1610	2378	1169	1414	2590	1988	2077	2309	438	1742	2022	1	1	0	0	0	0	0	0
North America	USA_141	2839	878	1091	3207	2016	1734	2301	437	2070	1986	2585	1404	2369	1167	1603	2079	1641	1757	2811	1099	1685	1710	1671	1719	2813	1047	1763	1634	7	0	0	0	0	0	0	1
North America	USA_142	2840	879	1089	3217	2016	1737	2308	437	2077	1990	2590	1410	2374	1166	1608	2078	1608	1753	2806	1086	1740	1675	1653	1738	2812	1069	1748	1602	7	0	0	0	0	0	0	1
North America	USA_144	2833	875	1089	3203	2016	1729	2295	437	2069	1982	2580	1405	2362	1163	1600	2078	1659	1728	2846	1085	1684	1654	1678	1719	2790	1040	1789	1652	2	0	1	0	0	0	0	0
North America	USA_149	2838	876	1088	3203	2015	1734	2301	435	2072	1988	2586	1407	2369	1163	1603	2077	1652	1737	2814	1187	1694	2044	1855	1823	2867	1006	1723	1614	7	0	0	0	0	0	0	1
North America	USA_151	2842	882	1089	3215	2018	1734	2309	439	2079	1989	2591	1413	2373	1167	1608	2080	1610	1752	2805	1084	1739	1676	1656	1742	2810	1070	1749	1603	7	0	0	0	0	0	0	1
North America	USA_152	2833	875	1090	3203	2016	1729	2296	437	2070	1983	2581	1406	2362	1163	1601	2078	1609	1756	2726	1079	1677	1667	1619	1686	2766	1094	1682	1639	7	0	0	0	0	0	0	1
North America	USA_153	2833	875	1089	3205	2016	1729	2295	437	2067	1983	2580	1402	2364	1163	1599	2077	1637	1752	2810	1095	1683	1706	1670	1720	2811	1046	1756	1630	7	0	0	0	0	0	0	1
North America	USA_155	2881	883	1093	3217	2020	1740	2306	437	2081	1992	2590	1411	2378	1166	1609	2080	1610	1814	2912	1158	1622	2062	1826	1791	2977	1027	1712	1659	7	0	0	0	0	0	0	1
North America	USA_157	2845	884	1091	3216	2020	1737	2306	438	2078	1990	2589	1410	2374	1167	1607	2081	1627	1787	2843	1071	1725	1650	1647	1708	2855	1108	1748	1652	7	0	0	0	0	0	0	1
North America	USA_159	2798	866	1074	3120	1976	1707	2253	430	2023	1945	2522	1376	2319	1136	1579	2033	1616	1700	2762	1165	1645	1996	1815	1786	2813	987	1697	1588	7	0	0	0	0	0	0	1
North America	USA_16	2825	877	1083	3188	2005	1727	2286	436	2062	1971	2561	1400	2356	1157	1596	2064	1643	1723	2807	1181	1683	2028	1842	1815	2853	1001	1715	1605	7	0	0	0	0	0	0	1
North America	USA_161	2868	882	1088	3209	2018	1735	2301	439	2073	1987	2587	1405	2369	1167	1607	2078	1590	1733	2880	1025	1882	1809	2015	1742	2819	1162	1804	1600	2	0	1	0	0	0	0	0
North America	USA_163	2841	883	1089	3208	2016	1735	2303	437	2077	1988	2587	1406	2375	1167	1604	2075	1619	1728	2879	1021	1822	1866	2038	1683	2838	1129	1791	1596	2	0	1	0	0	0	0	0
North America	USA_164	2841	882	1089	3215	2016	1733	2308	438	2076	1991	2591	1410	2374	1166	1605	2079	1621	1727	2879	982	1885	1832	2068	1667	2844	1185	1762	1615	6	0	0	0	0	0	1	0
North America	USA_165	2832	874	1090	3204	2013	1729	2298	437	2067	1981	2580	1405	2362	1164	1600	2078	1638	1751	2810	1096	1682	1706	1671	1719	2810	1046	1756	1630	7	0	0	0	0	0	0	1
North America	USA_167	2881	886	1092	3220	2020	1743	2309	438	2078	1995	2591	1412	2379	1165	1612	2081	2081	1612	2380	1168	1414	2590	1991	2077	2308	438	1742	2023	1	1	0	0	0	0	0	0
North America	USA_169	2833	875	1089	3206	2016	1729	2295	437	2068	1984	2581	1403	2364	1163	1599	2077	1646	1756	2826	1019	1802	1934	2024	1686	2851	1130	1726	1648	2	0	1	0	0	0	0	0
North America	USA_173	2832	873	1088	3201	2013	1725	2297	437	2069	1980	2578	1403	2365	1162	1598	2072	1637	1750	2808	1096	1682	1708	1669	1720	2810	1042	1756	1629	7	0	0	0	0	0	0	1
North America	USA_175	2880	887	1094	3219	2022	1741	2309	438	2080	1991	2590	1411	2379	1168	1610	2083	2083	1611	2379	1168	1414	2590	1991	2080	2307	438	1742	2023	1	1	0	0	0	0	0	0
North America	USA_176	2879	886	1093	3220	2023	1740	2309	439	2080	1991	2590	1412	2378	1168	1610	2084	2084	1611	2378	1168	1414	2591	1991	2079	2307	439	1741	2023	1	1	0	0	0	0	0	0
North America	USA_177	2832	874	1090	3204	2013	1729	2298	437	2068	1981	2580	1406	2362	1164	1600	2078	1585	1726	2877	1022	1874	1804	2016	1737	2803	1159	1792	1590	2	0	1	0	0	0	0	0
North America	USA_18	2880	885	1093	3221	2020	1740	2309	437	2081	1990	2590	1411	2380	1167	1610	2080	1680	1680	2942	1063	1833	1883	2089	1661	2900	1189	1763	1643	6	0	0	0	0	0	1	0
North America	USA_181	2880	886	1091	3218	2021	1741	2312	439	2079	1989	2588	1413	2379	1168	1611	2084	1630	1788	2718	1077	1738	2115	1920	1891	2756	1016	1658	1726	6	0	0	0	0	0	1	0
North America	USA_187	2774	866	1073	3134	1985	1689	2243	425	2030	1941	2538	1374	2302	1147	1562	2052	1623	1686	2830	980	1820	1810	2008	1682	2768	1116	1743	1621	2	0	1	0	0	0	0	0
North America	USA_191	2832	875	1089	3205	2015	1730	2298	438	2068	1982	2580	1405	2363	1165	1601	2079	1609	1758	2725	1078	1678	1667	1620	1685	2767	1095	1683	1639	7	0	0	0	0	0	0	1
North America	USA_198	2704	859	1067	3073	1964	1678	2203	426	2015	1926	2519	1358	2264	1144	1555	2026	1609	1679	2778	971	1792	1787	1994	1674	2723	1108	1713	1599	2	0	1	0	0	0	0	0
North America	USA_199	2839	880	1091	3204	2017	1736	2301	438	2075	1987	2585	1408	2370	1166	1605	2077	1652	1736	2821	1189	1691	2043	1857	1826	2869	1009	1726	1614	7	0	0	0	0	0	0	1
North America	USA_200	2878	888	1093	3220	2021	1742	2309	439	2080	1994	2587	1415	2381	1164	1610	2081	2081	1612	2380	1165	1415	2589	1991	2078	2306	439	1742	2022	1	1	0	0	0	0	0	0
North America	USA_203	2840	878	1086	3207	2016	1734	2303	436	2071	1987	2585	1405	2372	1164	1605	2077	1671	1782	2862	1162	1714	2055	1825	1849	2938	1016	1701	1673	2	0	1	0	0	0	0	0
North America	USA_205	2839	879	1091	3207	2015	1734	2300	437	2073	1986	2583	1406	2370	1167	1602	2077	1650	1780	2852	1138	1640	2038	1837	1822	2866	1018	1694	1722	2	0	1	0	0	0	0	0
North America	USA_209	2805	865	1080	3171	1991	1702	2272	432	2041	1960	2555	1385	2332	1146	1584	2050	1585	1736	2697	1065	1661	1652	1604	1663	2731	1083	1663	1624	7	0	0	0	0	0	0	1
North America	USA_21	2839	879	1091	3208	2016	1736	2302	436	2074	1987	2587	1406	2370	1167	1605	2078	1653	1736	2821	1189	1691	2045	1857	1824	2869	1007	1726	1614	7	0	0	0	0	0	0	1
North America	USA_219	2828	876	1087	3194	2010	1733	2294	437	2071	1981	2574	1406	2366	1160	1603	2068	1648	1733	2815	1185	1689	2037	1850	1819	2861	1005	1721	1610	7	0	0	0	0	0	0	1
North America	USA_227	2773	854	1055	3132	1967	1688	2247	426	2015	1943	2520	1373	2314	1124	1567	2021	1630	1719	2716	1047	1789	1885	1857	1685	2823	1040	1703	1531	2	0	1	0	0	0	0	0
North America	USA_229	2839	877	1091	3210	2016	1736	2303	438	2075	1988	2586	1408	2373	1167	1606	2076	1636	1762	2783	1148	1709	2095	1900	1825	2848	1003	1711	1620	2	0	1	0	0	0	0	0
North America	USA_231	2846	885	1091	3212	2021	1737	2305	439	2081	1987	2587	1413	2372	1167	1609	2081	1625	1787	2845	1071	1723	1649	1646	1713	2855	1109	1748	1653	7	0	0	0	0	0	0	1
North America	USA_234	2878	886	1093	3218	2022	1740	2307	437	2080	1990	2591	1410	2376	1168	1610	2083	1689	1730	2763	1096	1793	1627	1713	1696	2773	1083	1831	1585	2	0	1	0	0	0	0	0
North America	USA_237	2846	883	1089	3215	2021	1736	2308	439	2079	1989	2591	1412	2373	1169	1609	2084	1650	1798	2903	1040	1709	1697	1703	1747	2853	1054	1792	1706	2	0	1	0	0	0	0	0
North America	USA_238	2880	886	1093	3218	2022	1741	2311	439	2081	1988	2588	1414	2378	1167	1613	2083	2083	1614	2377	1166	1416	2591	1989	2080	2311	439	1741	2023	1	1	0	0	0	0	0	0
North America	USA_244	2848	887	1093	3217	2021	1741	2307	438	2079	1990	2590	1411	2376	1168	1611	2083	1602	1737	2901	1178	1680	2009	1888	1854	2847	1020	1773	1622	3	0	0	1	0	0	0	0
North America	USA_25	2841	881	1090	3210	2015	1737	2305	437	2074	1989	2587	1407	2374	1168	1605	2078	1611	1762	2734	1083	1682	1675	1622	1687	2772	1099	1692	1642	7	0	0	0	0	0	0	1
North America	USA_251	2879	885	1094	3220	2022	1741	2310	436	2081	1990	2591	1411	2379	1169	1609	2085	2085	1611	2378	1168	1414	2591	1990	2078	2308	437	1742	2023	1	1	0	0	0	0	0	0
North America	USA_255	2843	884	1088	3221	2021	1737	2305	440	2077	1990	2587	1411	2374	1166	1607	2081	1611	1752	2807	1084	1740	1673	1656	1741	2812	1073	1750	1604	7	0	0	0	0	0	0	1
North America	USA_257	2879	889	1093	3224	2024	1740	2307	438	2081	1991	2589	1410	2380	1166	1610	2081	2082	1612	2380	1167	1414	2590	1990	2079	2306	439	1743	2022	1	1	0	0	0	0	0	0
North America	USA_26	2841	881	1091	3210	2016	1736	2305	437	2078	1986	2587	1410	2372	1168	1606	2079	1613	1734	2883	1039	1846	1843	2026	1678	2858	1153	1803	1567	2	0	1	0	0	0	0	0
North America	USA_260	2821	875	1087	3200	2011	1727	2292	436	2062	1980	2574	1402	2358	1160	1596	2075	1597	1779	2814	1129	1688	1994	1881	1798	2822	1064	1721	1647	2	0	1	0	0	0	0	0
North America	USA_261	2786	867	1069	3156	1977	1710	2275	428	2035	1958	2546	1384	2335	1144	1585	2043	1591	1702	2834	965	1852	1797	2034	1636	2793	1162	1740	1594	2	0	1	0	0	0	0	0
North America	USA_262	2844	884	1090	3212	2020	1737	2305	438	2076	1989	2588	1409	2372	1167	1607	2082	1626	1787	2841	1071	1723	1650	1646	1709	2854	1107	1747	1652	7	0	0	0	0	0	0	1
North America	USA_266	2843	883	1088	3217	2018	1738	2306	439	2079	1989	2589	1410	2375	1168	1608	2079	1585	1817	2880	1147	1751	2009	1853	1833	2943	1101	1709	1626	2	0	1	0	0	0	0	0
North America	USA_267	2845	886	1092	3221	2020	1737	2309	438	2085	1989	2594	1412	2378	1173	1607	2082	1633	1794	2846	1152	1672	2080	1895	1839	2853	1045	1718	1694	4	0	0	0	1	0	0	0
North America	USA_27	2754	849	1047	3110	1958	1678	2246	425	2011	1919	2505	1367	2305	1126	1564	2020	1592	1668	2744	1005	1681	1699	1715	1696	2692	1000	1706	1619	2	0	1	0	0	0	0	0
North America	USA_274	2877	886	1092	3214	2023	1741	2305	439	2080	1992	2590	1414	2373	1167	1611	2085	1692	1731	2760	1096	1792	1626	1713	1695	2773	1084	1831	1585	6	0	0	0	0	0	1	0
North America	USA_276	2841	882	1090	3219	2018	1738	2306	437	2078	1990	2588	1409	2376	1167	1606	2079	1609	1754	2805	1086	1739	1675	1654	1740	2811	1070	1750	1602	3	0	0	1	0	0	0	0
North America	USA_277	2844	880	1090	3218	2018	1738	2307	437	2077	1991	2590	1411	2375	1166	1608	2081	1598	1750	2974	1074	1834	1868	2016	1760	2887	1152	1821	1612	6	0	0	0	0	0	1	0
North America	USA_278	2882	890	1093	3218	2019	1740	2313	437	2080	1987	2589	1414	2377	1168	1611	2084	2084	1612	2377	1167	1414	2591	1987	2081	2310	438	1741	2023	1	1	0	0	0	0	0	0
North America	USA_28	2847	890	1093	3215	2022	1743	2306	440	2080	1990	2588	1413	2375	1167	1613	2083	1658	1805	2850	989	1872	1976	2051	1704	2946	1119	1748	1618	2	0	1	0	0	0	0	0
North America	USA_282	2878	887	1094	3221	2024	1741	2308	438	2079	1991	2590	1410	2378	1168	1610	2085	2085	1611	2378	1168	1413	2590	1991	2078	2307	438	1742	2023	1	1	0	0	0	0	0	0
North America	USA_285	2839	879	1091	3209	2013	1736	2305	436	2072	1987	2587	1407	2370	1167	1605	2078	1652	1736	2822	1189	1691	2046	1857	1824	2869	1006	1726	1614	7	0	0	0	0	0	0	1
North America	USA_286	2835	873	1083	3195	2013	1731	2294	433	2066	1981	2578	1399	2365	1160	1603	2072	1591	1708	2896	1039	1851	1827	2026	1667	2864	1179	1773	1561	2	0	1	0	0	0	0	0
North America	USA_288	2879	887	1095	3219	2023	1741	2309	439	2078	1991	2590	1409	2379	1169	1610	2084	2084	1611	2378	1168	1413	2589	1992	2077	2308	439	1741	2023	1	1	0	0	0	0	0	0
North America	USA_289	2882	888	1094	3218	2022	1743	2308	437	2078	1993	2589	1413	2377	1164	1612	2084	2084	1612	2377	1168	1414	2589	1990	2078	2309	438	1743	2023	1	1	0	0	0	0	0	0
North America	USA_290	2820	877	1082	3199	2010	1723	2300	437	2071	1978	2575	1405	2368	1164	1592	2071	1633	1751	2775	1145	1701	2084	1885	1824	2829	997	1704	1614	3	0	0	1	0	0	0	0
North America	USA_294	2831	875	1089	3203	2016	1730	2295	437	2069	1982	2579	1405	2363	1163	1600	2078	1586	1726	2876	1022	1874	1803	2015	1737	2804	1160	1792	1589	3	0	0	1	0	0	0	0
North America	USA_295	2840	879	1091	3217	2016	1740	2308	437	2079	1990	2587	1411	2379	1165	1608	2077	1682	1752	2838	1146	1739	2045	1889	1835	2883	1010	1731	1654	7	0	0	0	0	0	0	1
North America	USA_298	2880	886	1094	3220	2022	1741	2308	437	2080	1992	2592	1411	2377	1168	1610	2084	2084	1611	2378	1168	1414	2591	1992	2079	2306	437	1742	2023	1	1	0	0	0	0	0	0
North America	USA_299	2880	886	1093	3221	2020	1740	2313	438	2077	1992	2591	1411	2380	1167	1610	2083	2083	1611	2379	1168	1414	2591	1991	2076	2308	438	1742	2023	1	1	0	0	0	0	0	0
North America	USA_3	2790	874	1083	3161	1994	1713	2265	429	2045	1960	2559	1383	2327	1154	1586	2060	1638	1705	2850	986	1838	1823	2031	1691	2791	1127	1761	1633	2	0	1	0	0	0	0	0
North America	USA_301	2853	887	1092	3216	2024	1741	2306	437	2081	1990	2591	1411	2376	1168	1611	2084	1564	1733	2825	1072	1718	1703	1683	1751	2812	1083	1704	1610	4	0	0	0	1	0	0	0
North America	USA_310	2880	888	1093	3216	2023	1742	2308	439	2081	1990	2587	1416	2376	1166	1612	2085	2085	1612	2376	1167	1414	2589	1989	2081	2308	439	1742	2023	1	1	0	0	0	0	0	0
North America	USA_311	2879	888	1094	3218	2021	1741	2310	438	2081	1988	2589	1412	2378	1171	1609	2085	2085	1611	2377	1169	1414	2590	1989	2080	2309	438	1742	2020	1	1	0	0	0	0	0	0
North America	USA_312	2822	877	1083	3183	2006	1728	2280	435	2064	1968	2561	1399	2351	1156	1599	2062	1641	1721	2804	1181	1682	2024	1842	1816	2852	1001	1712	1604	7	0	0	0	0	0	0	1
North America	USA_314	2841	884	1091	3209	2019	1736	2304	439	2077	1989	2588	1408	2373	1168	1605	2079	1585	1816	2876	1148	1751	2007	1854	1833	2940	1101	1709	1624	3	0	0	1	0	0	0	0
North America	USA_315	2840	881	1091	3207	2015	1737	2303	437	2073	1986	2584	1408	2370	1165	1607	2077	1654	1736	2820	1188	1692	2044	1858	1823	2870	1008	1727	1614	7	0	0	0	0	0	0	1
North America	USA_318	2811	871	1079	3154	1992	1713	2265	434	2045	1949	2540	1386	2331	1149	1589	2046	1612	1740	2800	1153	1695	2021	1847	1776	2892	1025	1691	1572	3	0	0	1	0	0	0	0
North America	USA_33	2877	886	1092	3213	2023	1740	2304	438	2078	1989	2587	1408	2376	1168	1608	2083	1684	1796	2727	1034	1825	2079	1991	1757	2893	1055	1693	1644	2	0	1	0	0	0	0	0
North America	USA_35	2839	878	1091	3209	2015	1736	2303	437	2072	1987	2586	1407	2370	1166	1605	2078	1652	1736	2821	1189	1691	2046	1857	1824	2869	1006	1726	1614	7	0	0	0	0	0	0	1
North America	USA_37	2846	883	1087	3210	2021	1737	2303	439	2077	1989	2588	1410	2371	1167	1607	2082	1627	1784	2841	1072	1723	1650	1646	1710	2853	1107	1747	1652	7	0	0	0	0	0	0	1
North America	USA_38	2873	885	1094	3220	2018	1738	2307	437	2074	1990	2591	1406	2374	1168	1608	2081	1942	1619	2560	1107	1466	2443	2051	1992	2428	607	1729	1982	1	1	0	0	0	0	0	0
North America	USA_40	2904	882	1090	3219	2018	1738	2307	438	2080	1988	2587	1413	2376	1168	1607	2081	1653	1728	2864	1223	1649	2065	1824	1827	2926	1044	1676	1663	2	0	1	0	0	0	0	0
North America	USA_41	2858	886	1093	3218	2022	1741	2309	439	2080	1991	2591	1412	2377	1169	1611	2084	1617	1812	2799	1023	1708	1756	1628	1773	2858	998	1707	1660	7	0	0	0	0	0	0	1
North America	USA_43	2844	883	1091	3212	2020	1736	2305	438	2077	1989	2589	1410	2371	1167	1607	2082	1626	1787	2841	1071	1723	1650	1646	1709	2854	1107	1746	1652	7	0	0	0	0	0	0	1
North America	USA_44	2879	886	1094	3222	2023	1741	2308	438	2079	1991	2591	1410	2377	1168	1611	2084	2084	1612	2378	1168	1413	2590	1991	2077	2307	438	1742	2023	1	1	0	0	0	0	0	0
North America	USA_46	2880	887	1094	3222	2023	1741	2307	437	2079	1993	2592	1409	2378	1167	1610	2083	2083	1611	2379	1168	1413	2591	1992	2078	2306	437	1742	2023	1	1	0	0	0	0	0	0
North America	USA_48	2853	887	1095	3219	2022	1741	2312	440	2085	1992	2594	1415	2380	1171	1612	2084	1611	1841	2800	1057	1755	1768	1709	1700	2900	1112	1720	1607	4	0	0	0	1	0	0	0
North America	USA_49	2839	877	1090	3208	2015	1734	2300	437	2071	1989	2583	1405	2372	1165	1602	2075	1647	1780	2854	1138	1640	2038	1837	1821	2866	1017	1694	1722	2	0	1	0	0	0	0	0
North America	USA_50	2832	875	1089	3204	2014	1727	2294	437	2069	1983	2581	1406	2359	1162	1600	2076	1677	1768	2802	1080	1712	1716	1662	1656	2915	1077	1706	1622	2	0	1	0	0	0	0	0
North America	USA_60	2839	879	1091	3209	2017	1735	2302	438	2074	1988	2585	1406	2373	1165	1605	2075	1652	1735	2822	1190	1691	2046	1856	1825	2869	1006	1726	1613	7	0	0	0	0	0	0	1
North America	USA_66	2845	883	1089	3217	2019	1734	2309	438	2078	1992	2591	1411	2377	1167	1605	2081	1572	1727	2862	1038	1838	1811	2064	1634	2799	1251	1770	1590	2	0	1	0	0	0	0	0
North America	USA_68	2845	883	1089	3208	2014	1734	2303	438	2079	1988	2587	1408	2375	1166	1605	2071	1619	1701	2924	1041	1843	1829	2033	1682	2871	1149	1798	1575	2	0	1	0	0	0	0	0
North America	USA_70	2824	878	1080	3185	2002	1728	2284	436	2062	1966	2559	1401	2351	1157	1599	2062	1643	1720	2803	1179	1685	2022	1841	1814	2853	1001	1714	1603	7	0	0	0	0	0	0	1
North America	USA_72	2828	875	1083	3201	2010	1729	2295	434	2069	1980	2579	1398	2369	1162	1599	2067	1614	1725	2872	975	1874	1826	2058	1657	2832	1178	1754	1609	2	0	1	0	0	0	0	0
North America	USA_78	2831	880	1091	3205	2010	1729	2304	438	2076	1984	2584	1410	2369	1163	1603	2072	1606	1805	2903	1158	1614	2060	1824	1786	2957	1024	1700	1651	7	0	0	0	0	0	0	1
North America	USA_79	2853	884	1093	3221	2020	1739	2307	439	2079	1989	2589	1412	2374	1168	1610	2083	1612	1813	2910	1159	1621	2062	1826	1791	2973	1028	1709	1657	7	0	0	0	0	0	0	1
North America	USA_8	2880	886	1093	3221	2022	1740	2310	438	2080	1990	2590	1412	2378	1168	1610	2084	2084	1611	2378	1168	1414	2591	1990	2079	2307	438	1742	2023	7	0	0	0	0	0	0	1
North America	USA_80	2879	885	1094	3221	2019	1740	2308	438	2080	1991	2588	1413	2379	1167	1609	2081	1670	1790	2858	1189	1673	2133	1860	1808	2989	1049	1659	1672	6	0	0	0	0	0	1	0
North America	USA_81	2859	887	1095	3219	2024	1743	2309	438	2081	1992	2592	1413	2377	1169	1613	2087	1625	1752	2893	1045	1851	1877	2031	1714	2869	1185	1760	1627	2	0	1	0	0	0	0	0
North America	USA_85	2810	869	1076	3180	2001	1713	2286	431	2056	1967	2566	1388	2357	1153	1587	2058	1598	1712	2855	970	1862	1814	2045	1652	2825	1167	1742	1592	2	0	1	0	0	0	0	0
North America	USA_89	2844	884	1091	3217	2018	1736	2309	438	2078	1988	2590	1410	2375	1168	1607	2081	1606	1778	2896	1197	1676	2031	1840	1864	2889	1048	1737	1651	2	0	1	0	0	0	0	0
North America	USA_9	2839	876	1090	3208	2016	1735	2301	437	2071	1989	2585	1406	2371	1165	1604	2077	1646	1763	2832	1020	1805	1938	2025	1687	2854	1133	1731	1656	2	0	1	0	0	0	0	0
North America	USA_90	2847	885	1092	3217	2021	1742	2307	438	2080	1990	2588	1410	2379	1168	1609	2082	1600	1736	2902	1178	1680	2008	1888	1853	2846	1021	1772	1622	6	0	0	0	0	0	1	0
North America	USA_92	2722	859	1065	3105	1952	1670	2216	420	2005	1903	2487	1356	2280	1128	1545	2012	1595	1693	2716	1068	1634	1643	1607	1664	2719	1015	1699	1580	7	0	0	0	0	0	0	1
North America	USA_94	2835	879	1088	3202	2018	1733	2295	439	2070	1982	2582	1403	2363	1166	1606	2077	1640	1756	2809	1096	1683	1704	1670	1721	2812	1047	1759	1634	7	0	0	0	0	0	0	1
North America	USA_97	2826	874	1089	3201	2012	1726	2292	437	2066	1981	2575	1402	2363	1161	1594	2073	1637	1747	2807	1094	1680	1704	1669	1716	2806	1045	1755	1628	7	0	0	0	0	0	0	1
North America	USA_99	2843	883	1088	3213	2018	1737	2308	440	2077	1985	2586	1413	2370	1168	1610	2082	1626	1784	2842	1072	1722	1649	1645	1710	2853	1108	1746	1652	7	0	0	0	0	0	0	1
Oceania	AUS_1	2814	868	1073	3182	1995	1708	2279	420	2047	1954	2557	1383	2341	1145	1585	2055	1571	1742	2811	1057	1721	1717	1695	1732	2827	1071	1717	1599	7	0	0	0	0	0	0	1
Oceania	AUS_2	2814	869	1072	3183	1993	1709	2280	418	2049	1953	2558	1383	2341	1146	1585	2055	1572	1743	2810	1056	1724	1717	1695	1733	2827	1071	1718	1599	7	0	0	0	0	0	0	1
Oceania	AUS_3	2841	882	1090	3204	2018	1735	2302	437	2076	1984	2584	1409	2369	1165	1607	2078	1654	1735	2821	1189	1691	2043	1855	1827	2871	1009	1727	1614	7	0	0	0	0	0	0	1
Oceania	AUS_4	2839	881	1090	3204	2017	1737	2301	437	2074	1987	2586	1408	2368	1166	1607	2079	1653	1736	2821	1189	1691	2043	1857	1826	2870	1009	1726	1614	7	0	0	0	0	0	0	1
Oceania	AUS_6	2839	880	1090	3202	2017	1737	2301	438	2075	1987	2585	1410	2368	1166	1607	2079	1654	1736	2820	1189	1691	2043	1857	1826	2870	1009	1726	1614	7	0	0	0	0	0	0	1
Oceania	AUS_7	2812	869	1073	3179	1994	1710	2278	420	2049	1956	2557	1385	2341	1145	1585	2055	1572	1744	2810	1057	1720	1717	1695	1732	2827	1071	1717	1599	7	0	0	0	0	0	0	1
Oceania	GUM_1	2882	885	1093	3218	2020	1742	2310	439	2081	1990	2588	1415	2378	1167	1612	2082	2082	1612	2378	1168	1414	2589	1989	2079	2308	439	1742	2023	1	1	0	0	0	0	0	0
Oceania	GUM_2	2880	886	1092	3216	2021	1741	2307	439	2081	1989	2587	1414	2376	1167	1611	2082	1691	1729	2762	1096	1793	1628	1713	1697	2774	1082	1832	1585	1	1	0	0	0	0	0	0
Oceania	NZL_1	2791	861	1065	3144	1976	1696	2266	436	2035	1943	2537	1386	2322	1149	1577	2038	1627	1697	2772	1172	1659	2003	1818	1785	2818	992	1694	1589	1	1	0	0	0	0	0	0
South America	ARG_1	2837	876	1091	3210	2020	1731	2301	438	2077	1983	2582	1408	2371	1163	1604	2076	1581	1810	2875	1146	1749	2004	1853	1828	2938	1099	1704	1623	2	0	1	0	0	0	0	0
South America	BRA_1	2852	883	1089	3220	2023	1738	2307	438	2080	1988	2590	1408	2377	1168	1611	2081	1652	1726	2867	1223	1650	2065	1827	1830	2919	1043	1671	1660	7	0	0	0	0	0	0	1
South America	BRA_10	2835	876	1087	3207	2019	1730	2294	438	2073	1985	2583	1407	2362	1162	1604	2078	1596	1772	2858	1064	1710	1635	1697	1672	2832	1109	1781	1610	2	0	1	0	0	0	0	0
South America	BRA_102	2343	709	896	2592	1651	1402	1879	326	1670	1613	2111	1112	1937	942	1285	1708	0	0	0	0	0	0	0	0	0	1	2	0	2	0	1	0	0	0	0	0
South America	BRA_103	2846	888	1089	3213	2026	1737	2301	439	2078	1990	2589	1409	2372	1167	1608	2084	1692	1726	2759	1095	1792	1626	1713	1695	2768	1084	1826	1582	3	0	0	1	0	0	0	0
South America	BRA_104	2777	868	1069	3168	1988	1711	2256	426	2040	1952	2538	1385	2327	1139	1583	2046	1646	1649	2887	1044	1802	1841	2052	1639	2841	1167	1732	1608	3	0	0	1	0	0	0	0
South America	BRA_105	2848	883	1088	3218	2021	1735	2309	438	2078	1989	2594	1410	2373	1167	1610	2082	1627	1787	2846	1073	1726	1652	1647	1709	2857	1108	1750	1653	7	0	0	0	0	0	0	1
South America	BRA_107	1404	471	590	1636	1054	900	1179	223	1085	1060	1381	736	1209	634	805	1124	845	912	1492	586	877	894	906	910	1439	583	923	843	7	0	0	0	0	0	0	1
South America	BRA_108	2849	883	1092	3220	2021	1738	2308	439	2081	1991	2593	1413	2375	1169	1610	2083	1627	1758	2874	1186	1715	2032	1878	1846	2889	1044	1746	1621	2	0	1	0	0	0	0	0
South America	BRA_11	2847	884	1089	3215	2024	1739	2303	438	2079	1989	2589	1410	2372	1168	1609	2085	1648	1694	2876	1074	1916	1833	2055	1727	2840	1149	1843	1537	7	0	0	0	0	0	0	1
South America	BRA_111	2847	886	1090	3215	2025	1739	2302	439	2080	1991	2589	1410	2374	1168	1608	2084	1624	1745	2860	1054	1687	1813	1779	1784	2795	1012	1754	1679	4	0	0	0	1	0	0	0
South America	BRA_113	2848	888	1091	3215	2024	1742	2307	439	2081	1990	2588	1413	2377	1166	1613	2083	0	0	0	0	0	0	0	0	0	0	2	0	1	1	0	0	0	0	0	0
South America	BRA_114	2847	885	1089	3217	2021	1737	2306	439	2078	1991	2589	1411	2375	1166	1608	2082	1651	1799	2902	1040	1709	1697	1701	1747	2852	1053	1793	1707	2	0	1	0	0	0	0	0
South America	BRA_118	2593	792	994	2869	1831	1572	2072	408	1876	1775	2335	1262	2121	1078	1463	1885	1477	1610	2468	978	1520	1509	1447	1512	2499	993	1540	1513	6	0	0	0	0	0	1	0
South America	BRA_119	2848	884	1090	3216	2022	1738	2305	439	2079	1988	2589	1410	2373	1169	1608	2083	1617	1783	2789	1085	1780	1706	1663	1796	2812	1053	1773	1605	6	0	0	0	0	0	1	0
South America	BRA_12	2848	881	1088	3223	2022	1735	2307	439	2077	1992	2591	1408	2377	1163	1609	2077	1625	1786	2845	1073	1727	1653	1646	1707	2855	1106	1749	1653	7	0	0	0	0	0	0	1
South America	BRA_122	2845	883	1090	3216	2025	1737	2303	440	2081	1990	2589	1410	2375	1167	1608	2082	1623	1835	2775	1182	1721	2046	1788	1862	2886	1035	1725	1620	7	0	0	0	0	0	0	1
South America	BRA_123	2408	760	954	2645	1742	1487	1939	392	1760	1715	2214	1190	2007	999	1387	1779	1373	1545	2398	931	1449	1407	1464	1429	2408	978	1537	1392	3	0	0	1	0	0	0	0
South America	BRA_125	2853	886	1090	3220	2024	1739	2308	440	2079	1992	2591	1411	2377	1166	1612	2082	1618	1810	2798	1022	1710	1756	1627	1771	2861	998	1708	1660	4	0	0	0	1	0	0	0
South America	BRA_126	2657	831	1012	3037	1906	1632	2154	405	1953	1855	2414	1319	2230	1090	1505	1953	1523	1656	2582	1010	1585	1565	1508	1575	2623	1041	1573	1547	3	0	0	1	0	0	0	0
South America	BRA_127	2847	884	1088	3220	2022	1736	2306	438	2079	1988	2590	1409	2374	1168	1607	2082	1648	1693	2877	1073	1919	1834	2054	1726	2839	1148	1842	1536	7	0	0	0	0	0	0	1
South America	BRA_13	2775	862	1072	3165	1990	1709	2258	434	2038	1956	2543	1378	2330	1150	1580	2043	1586	1741	2680	1063	1664	1649	1592	1656	2717	1081	1658	1616	7	0	0	0	0	0	0	1
South America	BRA_134	2848	884	1088	3217	2022	1736	2305	440	2077	1988	2588	1409	2372	1168	1608	2082	1627	1785	2844	1072	1724	1650	1647	1710	2855	1109	1749	1652	7	0	0	0	0	0	0	1
South America	BRA_137	2843	875	1078	3190	2009	1724	2274	434	2065	1970	2558	1401	2350	1152	1594	2063	1576	1792	2858	1139	1740	1990	1835	1817	2937	1089	1694	1614	2	0	1	0	0	0	0	0
South America	BRA_139	2842	883	1089	3209	2025	1732	2294	440	2073	1986	2581	1408	2365	1163	1604	2083	1627	1791	2705	1082	1731	2110	1905	1877	2765	1018	1651	1708	3	0	0	1	0	0	0	0
South America	BRA_142	2850	887	1090	3222	2025	1741	2305	439	2079	1992	2588	1410	2378	1166	1610	2083	0	1	0	0	6	1	0	2	0	1	3	0	1	1	0	0	0	0	0	0
South America	BRA_144	2847	887	1092	3214	2020	1741	2309	438	2080	1993	2590	1414	2378	1167	1608	2083	0	1	0	0	4	1	0	1	1	0	0	0	1	1	0	0	0	0	0	0
South America	BRA_145	2847	884	1090	3217	2019	1739	2307	439	2078	1991	2589	1410	2377	1166	1610	2077	1614	1783	2793	1086	1780	1707	1663	1795	2812	1052	1773	1605	7	0	0	0	0	0	0	1
South America	BRA_147	2852	884	1089	3219	2022	1738	2307	439	2079	1988	2590	1408	2376	1168	1611	2081	1655	1725	2865	1224	1650	2064	1827	1829	2919	1043	1671	1659	7	0	0	0	0	0	0	1
South America	BRA_149	2380	732	927	2682	1701	1456	1925	349	1690	1686	2167	1146	1987	953	1335	1759	1407	1468	2357	851	1533	1518	1697	1372	2436	947	1509	1375	2	0	1	0	0	0	0	0
South America	BRA_15	2847	883	1088	3217	2022	1735	2305	439	2078	1990	2589	1411	2373	1165	1609	2082	1627	1785	2844	1072	1725	1651	1647	1710	2855	1108	1749	1653	7	0	0	0	0	0	0	1
South America	BRA_156	2846	883	1088	3216	2022	1735	2304	439	2077	1988	2588	1409	2371	1166	1608	2081	1647	1693	2876	1073	1914	1834	2053	1724	2839	1147	1841	1535	7	0	0	0	0	0	0	1
South America	BRA_158	2848	884	1087	3220	2019	1737	2309	438	2078	1990	2591	1410	2376	1166	1610	2079	1622	1836	2773	1183	1721	2053	1784	1863	2887	1030	1725	1621	7	0	0	0	0	0	0	1
South America	BRA_16	2860	882	1088	3213	2022	1742	2302	438	2077	1989	2586	1406	2376	1167	1611	2080	1648	1693	2871	1072	1914	1833	2056	1724	2844	1147	1843	1542	7	0	0	0	0	0	0	1
South America	BRA_160	2848	883	1088	3218	2021	1739	2303	439	2080	1995	2591	1410	2378	1166	1606	2079	1627	1785	2846	1075	1726	1653	1648	1711	2855	1107	1749	1652	7	0	0	0	0	0	0	1
South America	BRA_163	2848	883	1088	3218	2022	1736	2305	439	2078	1989	2589	1410	2373	1167	1609	2082	1627	1786	2844	1072	1725	1651	1647	1710	2855	1108	1749	1654	7	0	0	0	0	0	0	1
South America	BRA_17	2847	885	1089	3217	2024	1739	2302	438	2078	1990	2590	1408	2373	1167	1610	2083	1627	1785	2845	1074	1723	1649	1648	1709	2855	1109	1750	1653	7	0	0	0	0	0	0	1
South America	BRA_170	2562	791	992	2878	1837	1575	2072	394	1886	1795	2356	1278	2117	1068	1462	1902	1511	1565	2650	965	1677	1647	1858	1515	2617	1054	1648	1432	3	0	0	1	0	0	0	0
South America	BRA_173	2841	882	1093	3216	2020	1739	2302	438	2078	1988	2588	1408	2372	1167	1610	2079	1653	1756	2896	1133	1708	2037	1902	1834	2898	1011	1738	1664	6	0	0	0	0	0	1	0
South America	BRA_174	2847	884	1089	3215	2023	1736	2305	439	2078	1988	2588	1409	2374	1166	1611	2081	1627	1786	2842	1073	1724	1651	1647	1710	2856	1108	1748	1653	3	0	0	1	0	0	0	0
South America	BRA_176	2845	884	1089	3218	2022	1739	2302	439	2077	1989	2588	1408	2372	1167	1610	2081	1611	1752	2804	1085	1737	1676	1657	1742	2812	1069	1750	1603	2	0	1	0	0	0	0	0
South America	BRA_179	2832	878	1090	3206	2016	1731	2296	439	2071	1984	2582	1407	2363	1163	1605	2076	1588	1720	2912	983	1799	1864	2066	1703	2805	1145	1748	1661	3	0	0	1	0	0	0	0
South America	BRA_18	2850	885	1087	3213	2025	1734	2302	439	2077	1986	2587	1408	2369	1167	1607	2084	1628	1784	2841	1071	1721	1649	1645	1710	2856	1109	1749	1652	7	0	0	0	0	0	0	1
South America	BRA_187	2859	883	1087	3215	2024	1737	2301	439	2076	1987	2587	1407	2369	1167	1608	2083	1645	1691	2877	1073	1913	1830	2054	1725	2846	1149	1843	1536	7	0	0	0	0	0	0	1
South America	BRA_188	2848	882	1090	3215	2025	1739	2304	439	2079	1990	2590	1410	2373	1168	1611	2085	1575	1728	2858	1039	1837	1811	2069	1636	2801	1251	1773	1590	7	0	0	0	0	0	0	1
South America	BRA_19	2848	885	1089	3218	2023	1738	2304	440	2078	1989	2588	1409	2375	1166	1611	2080	1628	1785	2844	1073	1724	1652	1649	1709	2856	1107	1750	1653	7	0	0	0	0	0	0	1
South America	BRA_190	2849	885	1088	3216	2025	1739	2303	439	2080	1989	2590	1409	2373	1168	1610	2084	1623	1837	2774	1183	1721	2046	1786	1865	2890	1036	1726	1621	7	0	0	0	0	0	0	1
South America	BRA_191	2847	887	1089	3215	2024	1737	2303	439	2079	1989	2589	1409	2372	1168	1607	2084	1640	1721	2883	1235	1676	2062	1837	1827	2953	1022	1712	1578	3	0	0	1	0	0	0	0
South America	BRA_193	2848	882	1088	3215	2021	1736	2306	438	2080	1988	2590	1411	2373	1168	1608	2082	1647	1693	2877	1073	1915	1834	2054	1725	2840	1148	1842	1536	7	0	0	0	0	0	0	1
South America	BRA_194	2849	884	1090	3218	2021	1737	2306	439	2078	1992	2590	1412	2374	1166	1608	2082	1637	1725	2883	1235	1677	2065	1835	1827	2956	1021	1711	1578	4	0	0	0	1	0	0	0
South America	BRA_202	2847	884	1087	3216	2021	1736	2306	439	2080	1988	2589	1411	2374	1168	1608	2081	1654	1724	2865	1223	1650	2062	1825	1829	2914	1045	1670	1658	7	0	0	0	0	0	0	1
South America	BRA_209	2291	701	870	2524	1613	1402	1851	331	1634	1598	2101	1104	1884	937	1296	1686	1318	1424	2263	826	1466	1471	1595	1383	2242	906	1421	1321	2	0	1	0	0	0	0	0
South America	BRA_210	2839	881	1089	3207	2015	1737	2303	439	2074	1984	2583	1408	2370	1168	1607	2077	1612	1760	2732	1084	1680	1671	1621	1687	2771	1100	1691	1641	6	0	0	0	0	0	1	0
South America	BRA_211	2811	874	1068	3167	1991	1713	2264	426	2050	1951	2538	1392	2336	1139	1586	2047	1589	1787	2862	1135	1594	2027	1791	1762	2927	1002	1680	1628	2	0	1	0	0	0	0	0
South America	BRA_216	2848	883	1089	3223	2023	1737	2306	440	2077	1988	2590	1409	2372	1167	1612	2082	1654	1725	2866	1224	1650	2063	1827	1829	2916	1044	1671	1659	7	0	0	0	0	0	0	1
South America	BRA_217	2856	888	1091	3219	2026	1738	2305	441	2078	1990	2588	1410	2375	1167	1610	2084	1601	1735	2902	1178	1680	2006	1887	1855	2848	1024	1774	1622	4	0	0	0	1	0	0	0
South America	BRA_218	2847	885	1088	3213	2025	1737	2301	440	2079	1989	2588	1408	2371	1169	1608	2084	1655	1726	2861	1223	1646	2063	1826	1830	2914	1044	1670	1658	7	0	0	0	0	0	0	1
South America	BRA_22	2855	884	1090	3218	2023	1739	2306	439	2078	1991	2590	1409	2376	1166	1611	2082	1622	1837	2776	1183	1721	2047	1787	1863	2893	1034	1727	1623	7	0	0	0	0	0	0	1
South America	BRA_220	2704	824	1015	3001	1904	1636	2163	411	1936	1848	2424	1309	2212	1097	1526	1961	1518	1656	2727	1002	1606	1655	1614	1626	2742	1021	1625	1588	2	0	1	0	0	0	0	0
South America	BRA_225	2863	884	1086	3217	2018	1731	2306	437	2074	1986	2587	1407	2372	1165	1605	2079	1648	1688	2876	1072	1912	1834	2053	1721	2844	1147	1843	1535	3	0	0	1	0	0	0	0
South America	BRA_226	2844	888	1089	3212	2022	1737	2296	439	2076	1986	2581	1408	2370	1166	1605	2081	1631	1791	2707	1082	1733	2112	1906	1878	2768	1015	1654	1708	3	0	0	1	0	0	0	0
South America	BRA_227	2852	884	1089	3222	2023	1738	2307	439	2078	1987	2589	1408	2375	1168	1611	2082	1571	1726	2863	1038	1837	1812	2068	1638	2801	1250	1774	1590	7	0	0	0	0	0	0	1
South America	BRA_229	2848	883	1087	3216	2023	1735	2306	438	2077	1988	2589	1410	2371	1166	1609	2084	1626	1784	2845	1072	1723	1651	1647	1710	2855	1108	1750	1652	7	0	0	0	0	0	0	1
South America	BRA_231	2853	885	1089	3215	2025	1738	2305	439	2079	1989	2591	1409	2373	1168	1611	2084	1619	1783	2788	1085	1780	1706	1663	1796	2816	1053	1774	1606	4	0	0	0	1	0	0	0
South America	BRA_235	2847	883	1089	3217	2021	1738	2305	438	2078	1989	2589	1409	2373	1167	1609	2082	1647	1694	2876	1075	1915	1835	2054	1725	2839	1147	1842	1537	3	0	0	1	0	0	0	0
South America	BRA_236	2850	883	1088	3218	2022	1737	2309	438	2076	1990	2590	1411	2373	1166	1609	2086	1621	1836	2775	1183	1721	2048	1784	1864	2890	1034	1726	1621	7	0	0	0	0	0	0	1
South America	BRA_237	2737	843	1046	3015	1928	1669	2183	422	1958	1897	2457	1322	2260	1105	1544	1973	1531	1706	2716	1025	1626	1552	1614	1574	2701	1067	1718	1535	2	0	1	0	0	0	0	0
South America	BRA_24	2857	886	1091	3221	2022	1740	2308	440	2077	1992	2590	1412	2375	1167	1611	2085	1627	1798	2718	1082	1738	2115	1911	1882	2774	1020	1657	1713	4	0	0	0	1	0	0	0
South America	BRA_241	2389	733	900	2687	1706	1468	1924	372	1745	1663	2159	1178	1995	976	1357	1741	1378	1473	2292	913	1432	1397	1355	1392	2355	933	1413	1378	3	0	0	1	0	0	0	0
South America	BRA_247	2852	884	1088	3217	2023	1734	2307	440	2075	1987	2588	1409	2374	1166	1608	2083	1628	1785	2843	1073	1724	1652	1646	1710	2859	1107	1750	1653	7	0	0	0	0	0	0	1
South America	BRA_250	2847	883	1088	3217	2022	1736	2305	439	2077	1990	2589	1409	2374	1166	1608	2081	1627	1785	2844	1072	1724	1652	1647	1709	2855	1107	1749	1652	7	0	0	0	0	0	0	1
South America	BRA_253	2854	884	1090	3219	2023	1740	2307	439	2080	1988	2589	1413	2373	1168	1612	2085	1600	1737	2901	1178	1681	2007	1886	1855	2847	1022	1776	1621	4	0	0	0	1	0	0	0
South America	BRA_256	2869	887	1091	3220	2024	1741	2307	439	2080	1991	2590	1410	2378	1168	1611	2083	0	1	0	0	4	0	0	0	0	1	2	0	1	1	0	0	0	0	0	0
South America	BRA_257	2840	880	1091	3209	2015	1737	2302	437	2074	1988	2587	1407	2371	1167	1606	2077	1619	1739	2905	976	1853	1822	2045	1734	2793	1172	1761	1708	2	0	1	0	0	0	0	0
South America	BRA_29	2721	844	1044	3115	1936	1669	2203	411	1997	1899	2477	1349	2272	1111	1546	1990	1513	1738	2774	1091	1684	1915	1784	1754	2833	1051	1639	1541	2	0	1	0	0	0	0	0
South America	BRA_3	2309	724	858	2504	1632	1412	1826	358	1641	1582	2043	1122	1882	918	1313	1672	1328	1426	2170	870	1350	1329	1275	1336	2220	884	1384	1340	3	0	0	1	0	0	0	0
South America	BRA_32	2424	743	960	2683	1737	1485	1951	385	1774	1713	2216	1194	2026	1001	1376	1771	1352	1467	2470	914	1588	1577	1766	1424	2432	1047	1537	1337	2	0	1	0	0	0	0	0
South America	BRA_33	2848	882	1089	3219	2022	1738	2307	439	2077	1989	2589	1411	2374	1166	1612	2083	1651	1726	2868	1223	1648	2063	1826	1829	2919	1043	1670	1660	7	0	0	0	0	0	0	1
South America	BRA_36	2840	876	1086	3207	2020	1729	2295	434	2072	1982	2582	1403	2364	1160	1603	2075	1639	1689	2867	1068	1912	1828	2047	1718	2835	1144	1837	1529	7	0	0	0	0	0	0	1
South America	BRA_4	2850	883	1089	3217	2023	1738	2307	440	2077	1989	2590	1410	2374	1167	1612	2082	1652	1725	2866	1224	1649	2063	1828	1830	2918	1044	1671	1659	7	0	0	0	0	0	0	1
South America	BRA_40	2848	886	1087	3214	2024	1734	2304	439	2079	1986	2588	1407	2374	1168	1607	2081	1628	1784	2842	1072	1723	1648	1645	1711	2854	1108	1749	1653	3	0	0	1	0	0	0	0
South America	BRA_44	2847	883	1090	3217	2022	1737	2305	439	2079	1989	2589	1410	2374	1168	1608	2082	1573	1728	2860	1038	1837	1812	2067	1636	2799	1250	1771	1590	7	0	0	0	0	0	0	1
South America	BRA_46	2832	878	1090	3205	2016	1731	2296	439	2071	1984	2582	1407	2363	1163	1605	2076	1648	1742	2789	1191	1709	2030	1854	1791	2883	1036	1709	1582	3	0	0	1	0	0	0	0
South America	BRA_48	2847	884	1088	3214	2022	1735	2304	440	2076	1988	2588	1409	2371	1167	1608	2082	1648	1693	2875	1073	1914	1833	2054	1724	2839	1148	1842	1535	7	0	0	0	0	0	0	1
South America	BRA_5	2846	887	1089	3211	2024	1737	2299	439	2077	1989	2587	1409	2370	1167	1607	2084	1601	1749	2971	1074	1833	1863	2015	1765	2888	1156	1820	1612	3	0	0	1	0	0	0	0
South America	BRA_51	2847	883	1088	3216	2022	1736	2305	439	2076	1989	2589	1408	2373	1167	1609	2081	1651	1725	2866	1223	1649	2062	1826	1829	2915	1043	1669	1659	7	0	0	0	0	0	0	1
South America	BRA_52	2846	884	1088	3220	2021	1737	2304	440	2076	1992	2587	1409	2376	1165	1607	2079	1626	1784	2846	1072	1724	1653	1647	1710	2854	1106	1748	1652	7	0	0	0	0	0	0	1
South America	BRA_53	2839	878	1089	3203	2014	1737	2305	437	2077	1989	2587	1411	2374	1166	1606	2076	1620	1738	2904	976	1853	1825	2045	1736	2792	1169	1762	1708	2	0	1	0	0	0	0	0
South America	BRA_55	2714	857	1047	3036	1935	1666	2185	425	1984	1893	2467	1336	2260	1127	1541	1988	1636	1676	2693	1097	1663	1951	1804	1751	2747	968	1660	1583	2	0	1	0	0	0	0	0
South America	BRA_56	2660	815	995	2941	1868	1603	2119	401	1901	1798	2366	1282	2167	1077	1493	1923	1484	1620	2660	979	1582	1624	1577	1601	2698	1004	1591	1560	2	0	1	0	0	0	0	0
South America	BRA_58	2846	882	1087	3218	2020	1736	2305	439	2079	1989	2590	1410	2373	1167	1608	2078	1573	1725	2858	1038	1839	1812	2066	1635	2795	1249	1771	1589	7	0	0	0	0	0	0	1
South America	BRA_59	2191	679	837	2428	1562	1336	1773	345	1590	1494	1969	1066	1823	905	1250	1594	1272	1346	2100	830	1302	1266	1255	1263	2138	859	1310	1285	3	0	0	1	0	0	0	0
South America	BRA_6	2882	888	1091	3222	2025	1741	2305	439	2079	1990	2589	1410	2376	1168	1611	2085	2024	1741	2307	439	2082	1990	2588	1411	2377	1169	1612	2084	4	0	0	0	1	0	0	0
South America	BRA_64	2846	887	1089	3214	2023	1738	2299	439	2076	1989	2585	1409	2370	1165	1608	2082	1616	1807	2792	1022	1704	1754	1624	1772	2853	996	1704	1659	3	0	0	1	0	0	0	0
South America	BRA_65	2844	887	1088	3213	2021	1737	2298	439	2077	1987	2583	1407	2371	1167	1605	2079	1601	1732	2897	1176	1676	2005	1883	1849	2842	1021	1769	1620	3	0	0	1	0	0	0	0
South America	BRA_66	2849	886	1089	3220	2021	1736	2308	440	2077	1988	2589	1409	2374	1168	1610	2081	1572	1728	2861	1036	1838	1811	2067	1637	2799	1251	1772	1591	7	0	0	0	0	0	0	1
South America	BRA_67	2842	882	1087	3216	2020	1737	2303	439	2078	1990	2589	1408	2374	1168	1607	2078	1683	1752	2836	1144	1739	2043	1888	1835	2882	1013	1729	1654	6	0	0	0	0	0	1	0
South America	BRA_69	2853	885	1089	3217	2022	1738	2306	439	2078	1990	2591	1410	2373	1167	1611	2083	1588	1773	2937	1078	1814	1864	1993	1720	2900	1174	1808	1594	3	0	0	1	0	0	0	0
South America	BRA_7	2849	883	1088	3216	2024	1735	2307	439	2081	1989	2589	1412	2375	1167	1607	2083	1647	1692	2878	1073	1916	1834	2053	1727	2842	1148	1843	1536	7	0	0	0	0	0	0	1
South America	BRA_71	2849	885	1089	3215	2024	1739	2303	439	2079	1989	2590	1409	2373	1167	1611	2082	1628	1786	2844	1074	1723	1651	1648	1710	2857	1108	1750	1653	7	0	0	0	0	0	0	1
South America	BRA_73	2776	866	1068	3165	1987	1710	2255	427	2037	1951	2538	1383	2324	1139	1583	2045	1577	1747	2843	1173	1647	1987	1802	1833	2833	1026	1694	1622	3	0	0	1	0	0	0	0
South America	BRA_74	2847	883	1088	3217	2021	1736	2306	439	2079	1987	2588	1409	2375	1168	1607	2081	1627	1785	2845	1072	1723	1651	1647	1710	2854	1108	1750	1652	7	0	0	0	0	0	0	1
South America	BRA_75	2847	883	1089	3220	2020	1738	2309	437	2074	1989	2590	1407	2376	1167	1610	2082	1585	1775	2933	1078	1815	1863	1989	1719	2897	1172	1806	1594	3	0	0	1	0	0	0	0
South America	BRA_76	2848	884	1090	3217	2022	1736	2305	439	2078	1989	2590	1410	2372	1167	1608	2083	1655	1725	2864	1225	1649	2064	1826	1829	2915	1043	1670	1658	7	0	0	0	0	0	0	1
South America	BRA_79	2849	884	1090	3219	2022	1738	2306	439	2078	1989	2591	1408	2375	1168	1611	2081	1628	1786	2844	1075	1726	1653	1649	1711	2858	1107	1750	1652	7	0	0	0	0	0	0	1
South America	BRA_8	2857	887	1091	3220	2023	1741	2308	439	2080	1990	2590	1411	2377	1168	1610	2084	0	3	0	0	3	1	0	0	0	1	2	0	7	0	0	0	0	0	0	1
South America	BRA_81	2854	885	1089	3216	2030	1739	2303	439	2080	1989	2590	1409	2374	1168	1611	2088	1567	1731	2824	1070	1717	1701	1683	1750	2813	1083	1705	1612	2	0	1	0	0	0	0	0
South America	BRA_83	2852	882	1089	3221	2023	1737	2305	439	2078	1986	2588	1408	2373	1167	1612	2081	1652	1725	2864	1223	1649	2063	1827	1827	2918	1044	1671	1659	7	0	0	0	0	0	0	1
South America	BRA_88	1718	544	718	1992	1297	1066	1415	299	1279	1257	1593	851	1505	720	979	1292	1038	1103	1739	752	1102	1285	1163	1119	1834	629	1107	989	7	0	0	0	0	0	0	1
South America	BRA_89	2234	711	865	2593	1598	1355	1850	332	1648	1601	2080	1123	1898	919	1245	1657	1290	1383	2274	863	1403	1601	1529	1492	2305	816	1337	1326	2	0	1	0	0	0	0	0
South America	BRA_9	2848	887	1094	3219	2022	1742	2306	438	2080	1991	2589	1411	2377	1168	1610	2083	0	1	0	0	3	0	0	0	0	0	0	0	1	1	0	0	0	0	0	0
South America	BRA_92	2847	882	1089	3219	2022	1736	2304	440	2077	1991	2588	1411	2373	1166	1607	2082	1646	1693	2878	1073	1915	1835	2055	1726	2838	1147	1842	1536	7	0	0	0	0	0	0	1
South America	BRA_94	2848	884	1088	3217	2022	1735	2306	439	2078	1988	2590	1410	2372	1167	1608	2082	1647	1693	2877	1074	1915	1834	2053	1726	2840	1148	1842	1535	7	0	0	0	0	0	0	1
South America	BRA_99	2851	885	1089	3215	2025	1739	2303	440	2079	1989	2590	1409	2372	1168	1612	2084	1656	1726	2863	1224	1648	2063	1828	1830	2919	1044	1671	1659	7	0	0	0	0	0	0	1
South America	CHL_1	2845	887	1092	3215	2023	1737	2307	439	2078	1991	2588	1414	2374	1165	1609	2085	1	2	0	0	3	3	1	2	0	0	1	0	1	1	0	0	0	0	0	0
South America	COL_1	2833	876	1090	3204	2016	1730	2296	436	2068	1981	2580	1402	2363	1163	1601	2078	1639	1752	2809	1097	1682	1706	1669	1720	2812	1046	1757	1630	2	0	1	0	0	0	0	0
South America	COL_10	2802	867	1081	3159	1995	1715	2267	436	2051	1967	2558	1390	2335	1157	1583	2057	1610	1754	2810	1098	1722	1682	1650	1709	2857	1100	1723	1596	2	0	1	0	0	0	0	0
South America	COL_103	2833	876	1090	3204	2016	1729	2294	438	2067	1983	2580	1402	2363	1163	1600	2076	1631	1684	2880	1033	1807	1816	2048	1658	2801	1158	1780	1611	7	0	0	0	0	0	0	1
South America	COL_104	2814	873	1085	3188	2002	1721	2282	437	2051	1975	2570	1386	2350	1160	1592	2060	1598	1755	2708	1071	1675	1659	1610	1669	2748	1092	1674	1627	7	0	0	0	0	0	0	1
South America	COL_106	2836	881	1085	3202	2015	1735	2301	438	2069	1987	2584	1409	2364	1162	1607	2078	1689	1638	2874	1092	1668	1675	1750	1636	2824	1044	1756	1616	3	0	0	1	0	0	0	0
South America	COL_107	2773	858	1058	3125	1970	1698	2250	428	2022	1947	2513	1375	2328	1134	1558	2031	0	1	0	0	4	1	0	0	0	0	0	0	3	0	0	1	0	0	0	0
South America	COL_108	2865	875	1086	3208	2016	1725	2295	434	2073	1979	2577	1408	2362	1159	1597	2076	1599	1708	2889	1108	1694	1695	1756	1743	2786	1051	1833	1596	3	0	0	1	0	0	0	0
South America	COL_11	2832	874	1088	3203	2016	1728	2295	436	2068	1983	2580	1406	2361	1161	1601	2077	1685	1680	2822	1028	1882	1874	2048	1686	2847	1118	1753	1583	7	0	0	0	0	0	0	1
South America	COL_12	2833	876	1090	3205	2017	1729	2294	437	2068	1983	2580	1403	2362	1163	1600	2078	1659	1729	2846	1086	1683	1654	1678	1718	2790	1040	1789	1652	2	0	1	0	0	0	0	0
South America	COL_13	2838	878	1091	3206	2016	1735	2301	437	2073	1987	2586	1407	2369	1167	1605	2078	1611	1761	2732	1083	1680	1671	1621	1686	2771	1098	1690	1641	7	0	0	0	0	0	0	1
South America	COL_14	2699	830	1050	3043	1945	1657	2186	422	1990	1906	2498	1349	2234	1127	1542	2010	1629	1612	2691	1014	1806	1808	1960	1619	2734	1077	1673	1522	3	0	0	1	0	0	0	0
South America	COL_15	2758	855	1065	3133	1968	1700	2231	429	2023	1953	2528	1361	2317	1144	1560	2022	1567	1721	2659	1058	1651	1630	1585	1636	2699	1077	1646	1594	3	0	0	1	0	0	0	0
South America	COL_18	2778	859	1060	3120	1970	1697	2253	423	2012	1936	2525	1363	2312	1135	1574	2031	1580	1730	2663	1048	1645	1624	1574	1638	2706	1067	1655	1602	3	0	0	1	0	0	0	0
South America	COL_2	2409	721	908	2659	1692	1468	1932	360	1736	1655	2143	1168	2009	976	1343	1744	1364	1471	2397	953	1433	1686	1577	1545	2460	866	1427	1392	2	0	1	0	0	0	0	0
South America	COL_22	2217	688	844	2518	1585	1333	1811	342	1615	1537	1994	1092	1880	906	1227	1624	1245	1367	2253	804	1343	1391	1358	1350	2287	859	1335	1338	3	0	0	1	0	0	0	0
South America	COL_24	2099	648	802	2332	1468	1267	1698	327	1498	1442	1898	1015	1725	851	1200	1505	1214	1297	1990	773	1245	1218	1171	1203	2054	802	1239	1210	3	0	0	1	0	0	0	0
South America	COL_25	2774	855	1061	3122	1970	1703	2240	429	2007	1947	2519	1358	2315	1135	1569	2028	1576	1727	2666	1053	1645	1623	1575	1633	2707	1066	1654	1594	3	0	0	1	0	0	0	0
South America	COL_27	2759	862	1062	3140	1964	1691	2238	428	2015	1932	2516	1369	2300	1134	1569	2022	1572	1717	2663	1051	1646	1632	1575	1641	2709	1074	1635	1605	3	0	0	1	0	0	0	0
South America	COL_28	2757	863	1068	3138	1972	1694	2226	428	2027	1938	2515	1367	2306	1138	1564	2018	0	2	0	0	3	0	0	0	0	0	0	0	2	0	1	0	0	0	0	0
South America	COL_29	2647	818	999	2945	1878	1623	2137	391	1919	1839	2417	1278	2200	1090	1502	1936	1499	1639	2698	991	1577	1629	1597	1604	2695	1008	1604	1567	2	0	1	0	0	0	0	0
South America	COL_3	2831	877	1089	3202	2017	1727	2291	437	2068	1981	2579	1403	2359	1162	1600	2076	1630	1754	2827	1156	1724	2053	1891	1794	2927	1036	1699	1581	7	0	0	0	0	0	0	1
South America	COL_30	2175	672	845	2519	1565	1357	1788	328	1633	1539	2003	1102	1855	910	1241	1613	1299	1323	2245	796	1408	1429	1575	1316	2173	902	1352	1302	3	0	0	1	0	0	0	0
South America	COL_31	2862	872	1090	3204	2016	1729	2296	437	2068	1982	2581	1403	2362	1163	1601	2078	1597	1773	2881	1181	1703	2025	1902	1818	2905	1042	1783	1581	2	0	1	0	0	0	0	0
South America	COL_32	2833	877	1091	3203	2018	1728	2293	437	2070	1984	2583	1404	2360	1163	1601	2078	1686	1681	2822	1032	1881	1875	2048	1686	2847	1120	1753	1583	7	0	0	0	0	0	0	1
South America	COL_33	2833	874	1089	3202	2017	1730	2295	437	2068	1982	2579	1407	2360	1161	1602	2080	1632	1755	2828	1155	1725	2054	1890	1793	2929	1036	1702	1583	7	0	0	0	0	0	0	1
South America	COL_34	2838	878	1087	3204	2015	1737	2301	440	2073	1990	2586	1409	2370	1168	1605	2077	1612	1761	2731	1085	1681	1669	1621	1685	2769	1100	1692	1639	7	0	0	0	0	0	0	1
South America	COL_36	2833	875	1090	3202	2016	1730	2295	437	2068	1982	2580	1404	2362	1163	1601	2078	1631	1684	2880	1032	1808	1816	2048	1660	2801	1158	1780	1612	2	0	1	0	0	0	0	0
South America	COL_4	2321	733	884	2616	1656	1414	1899	354	1690	1642	2136	1137	1960	955	1308	1701	1333	1461	2402	875	1410	1465	1400	1408	2367	904	1415	1374	2	0	1	0	0	0	0	0
South America	COL_42	2812	871	1083	3188	1998	1722	2287	434	2053	1975	2572	1389	2354	1160	1592	2060	1598	1754	2708	1071	1675	1661	1610	1667	2748	1090	1675	1627	7	0	0	0	0	0	0	1
South America	COL_43	2840	880	1092	3215	2017	1737	2304	437	2079	1988	2589	1410	2370	1166	1607	2079	1682	1753	2836	1145	1738	2044	1888	1835	2881	1010	1729	1653	3	0	0	1	0	0	0	0
South America	COL_44	2824	874	1086	3190	2014	1726	2290	438	2066	1981	2577	1402	2358	1162	1597	2073	1596	1769	2872	1182	1700	2019	1898	1817	2884	1041	1772	1575	2	0	1	0	0	0	0	0
South America	COL_45	2839	880	1089	3205	2016	1736	2302	438	2072	1988	2586	1409	2368	1165	1607	2078	1610	1761	2732	1084	1679	1672	1621	1687	2771	1099	1691	1640	7	0	0	0	0	0	0	1
South America	COL_48	2739	852	1062	3123	1976	1692	2239	434	2034	1944	2524	1379	2316	1146	1561	2035	1592	1653	2809	1009	1763	1779	2004	1624	2731	1137	1738	1580	2	0	1	0	0	0	0	0
South America	COL_5	2799	873	1072	3172	1995	1715	2273	428	2054	1970	2557	1388	2348	1142	1592	2044	1578	1693	2873	1025	1842	1807	2021	1657	2828	1167	1752	1546	2	0	1	0	0	0	0	0
South America	COL_50	2833	876	1090	3204	2016	1729	2294	438	2068	1983	2580	1403	2363	1163	1600	2076	1631	1755	2830	1156	1725	2054	1891	1793	2928	1036	1702	1582	7	0	0	0	0	0	0	1
South America	COL_51	2841	883	1092	3214	2017	1736	2306	437	2079	1989	2591	1410	2372	1168	1607	2080	1640	1764	2786	1149	1709	2096	1900	1829	2852	1003	1711	1619	2	0	1	0	0	0	0	0
South America	COL_52	2623	820	1029	3007	1899	1613	2131	415	1951	1859	2413	1311	2214	1095	1487	1939	1587	1620	2648	1074	1630	1897	1775	1716	2669	945	1617	1541	3	0	0	1	0	0	0	0
South America	COL_53	2144	656	793	2415	1513	1268	1754	330	1538	1473	1920	1055	1795	857	1189	1553	1189	1297	2178	760	1282	1350	1295	1291	2203	822	1268	1295	3	0	0	1	0	0	0	0
South America	COL_55	2710	832	1041	3059	1932	1660	2196	426	1968	1901	2472	1328	2264	1127	1530	1991	1534	1662	2723	961	1790	1776	1991	1585	2706	1143	1686	1530	3	0	0	1	0	0	0	0
South America	COL_56	2819	867	1087	3173	2004	1722	2277	437	2060	1968	2563	1393	2348	1160	1595	2061	1677	1676	2804	1027	1867	1867	2037	1671	2838	1113	1742	1576	7	0	0	0	0	0	0	1
South America	COL_6	2627	820	1017	2985	1867	1614	2134	401	1915	1841	2390	1289	2212	1080	1484	1918	1495	1645	2538	999	1567	1539	1493	1546	2583	1025	1561	1523	6	0	0	0	0	0	1	0
South America	COL_60	2813	873	1086	3193	2006	1723	2288	437	2057	1977	2573	1396	2353	1160	1596	2067	1608	1780	2846	1006	1791	1884	2009	1631	2866	1172	1730	1624	2	0	1	0	0	0	0	0
South America	COL_62	2677	836	1044	3072	1937	1655	2180	422	1992	1897	2462	1335	2268	1118	1525	1977	1551	1696	2739	965	1718	1802	1940	1567	2730	1128	1659	1569	2	0	1	0	0	0	0	0
South America	COL_65	2526	794	997	2928	1850	1575	2072	399	1903	1805	2349	1271	2159	1066	1453	1884	1462	1581	2481	986	1543	1516	1485	1534	2511	1006	1514	1494	3	0	0	1	0	0	0	0
South America	COL_69	1631	519	606	1768	1165	966	1332	262	1154	1099	1458	789	1341	655	931	1191	906	978	1632	591	979	1020	982	987	1667	636	988	977	7	0	0	0	0	0	0	1
South America	COL_7	2671	821	1041	3035	1916	1636	2165	418	1959	1886	2462	1343	2204	1112	1518	1993	1542	1589	2723	997	1706	1748	1958	1579	2645	1095	1696	1523	2	0	1	0	0	0	0	0
South America	COL_70	1845	590	706	2051	1346	1119	1524	326	1366	1304	1710	930	1555	793	1055	1374	1089	1146	1801	730	1122	1097	1071	1099	1819	738	1115	1116	7	0	0	0	0	0	0	1
South America	COL_73	2835	876	1087	3205	2017	1729	2293	438	2068	1982	2581	1403	2360	1164	1601	2078	1586	1728	2876	1021	1874	1804	2014	1739	2805	1159	1792	1591	2	0	1	0	0	0	0	0
South America	COL_74	2701	841	1050	3086	1945	1653	2191	422	1995	1902	2475	1349	2262	1118	1532	1994	1621	1666	2718	1095	1670	1942	1817	1757	2751	970	1648	1584	3	0	0	1	0	0	0	0
South America	COL_75	2866	876	1085	3206	2013	1723	2294	433	2072	1981	2577	1408	2361	1159	1593	2074	1645	1793	2834	977	1867	1968	2041	1695	2929	1110	1734	1610	3	0	0	1	0	0	0	0
South America	COL_76	2832	875	1088	3202	2016	1728	2294	437	2068	1982	2579	1405	2361	1162	1600	2077	1631	1754	2828	1155	1725	2054	1891	1793	2927	1036	1702	1582	7	0	0	0	0	0	0	1
South America	COL_77	2534	801	994	2906	1855	1565	2065	404	1907	1798	2333	1289	2145	1069	1441	1900	1483	1616	2590	924	1636	1730	1826	1498	2627	1073	1565	1476	2	0	1	0	0	0	0	0
South America	COL_8	2840	882	1092	3214	2018	1737	2304	438	2079	1989	2590	1410	2371	1168	1608	2079	1683	1753	2836	1146	1738	2043	1889	1836	2881	1012	1729	1653	6	0	0	0	0	0	1	0
South America	COL_90	2809	872	1082	3188	1999	1722	2286	436	2053	1975	2569	1389	2355	1161	1591	2060	1599	1754	2708	1070	1675	1662	1609	1670	2744	1091	1674	1628	7	0	0	0	0	0	0	1
South America	COL_91	2559	786	958	2859	1796	1551	2059	384	1842	1761	2300	1245	2117	1048	1427	1861	1439	1566	2584	950	1524	1568	1544	1545	2598	976	1541	1511	2	0	1	0	0	0	0	0
South America	COL_94	2818	876	1087	3190	2013	1727	2289	435	2063	1977	2574	1397	2357	1160	1599	2071	0	2	0	0	4	0	0	0	0	0	1	0	2	0	1	0	0	0	0	0
South America	COL_96	2732	859	1058	3112	1958	1675	2213	427	2012	1921	2500	1357	2286	1131	1551	2007	1575	1727	2776	977	1742	1825	1961	1586	2782	1145	1681	1587	2	0	1	0	0	0	0	0
South America	ECU_1	2835	877	1089	3204	2015	1731	2296	439	2072	1982	2581	1405	2363	1165	1603	2076	1609	1756	2728	1083	1676	1668	1618	1687	2767	1095	1685	1640	7	0	0	0	0	0	0	1
South America	ECU_16	2756	852	1044	3075	1952	1663	2191	417	2007	1903	2480	1355	2259	1119	1539	1998	1557	1666	2632	1054	1617	1598	1556	1628	2688	1064	1624	1590	7	0	0	0	0	0	0	1
South America	ECU_17	2877	889	1090	3218	2023	1742	2307	438	2080	1990	2588	1412	2377	1167	1611	2084	66	62	70	49	47	46	43	54	65	46	67	71	1	1	0	0	0	0	0	0
South America	ECU_18	2748	852	1062	3126	1966	1671	2231	425	2027	1924	2520	1363	2299	1142	1550	2018	1527	1678	2783	1075	1696	1676	1725	1702	2711	1051	1757	1511	2	0	1	0	0	0	0	0
South America	ECU_19	2761	862	1064	3143	1976	1698	2241	434	2035	1942	2529	1373	2315	1150	1568	2029	1582	1682	2805	968	1837	1793	2018	1629	2780	1160	1717	1565	2	0	1	0	0	0	0	0
South America	ECU_2	2786	859	1064	3156	1981	1689	2269	413	2033	1941	2537	1375	2329	1132	1564	2042	1578	1662	2803	1045	1704	1647	1653	1705	2787	1020	1713	1557	3	0	0	1	0	0	0	0
South America	ECU_20	2877	889	1089	3223	2024	1743	2309	440	2077	1990	2588	1410	2378	1167	1614	2084	1	2	0	0	6	0	0	1	0	2	3	0	1	1	0	0	0	0	0	0
South America	ECU_4	2882	885	1089	3222	2021	1741	2313	440	2078	1989	2586	1413	2381	1168	1610	2084	0	1	1	0	7	2	1	1	0	1	6	0	1	1	0	0	0	0	0	0
South America	ECU_6	2779	855	1058	3138	1965	1685	2244	413	2022	1919	2515	1361	2308	1131	1564	2021	1568	1708	2816	1035	1662	1714	1686	1690	2840	1060	1667	1629	3	0	0	1	0	0	0	0
South America	ECU_8	2882	887	1088	3221	2023	1741	2310	438	2080	1993	2589	1411	2383	1165	1610	2081	0	1	0	0	9	2	0	1	0	2	4	0	1	1	0	0	0	0	0	0
South America	PER_1	2819	869	1075	3192	1997	1717	2285	429	2057	1970	2567	1396	2349	1153	1590	2060	1628	1724	2858	1169	1665	2005	1854	1778	2888	1054	1690	1635	2	0	1	0	0	0	0	0
South America	VEN_1	2825	868	1084	3187	2012	1725	2279	435	2061	1975	2572	1395	2351	1159	1597	2068	1621	1681	2870	1027	1798	1808	2043	1652	2792	1152	1777	1609	2	0	1	0	0	0	0	0
South America	VEN_2	2407	750	932	2726	1738	1485	1915	394	1799	1700	2174	1210	2031	1019	1334	1773	1405	1421	2427	892	1558	1569	1764	1445	2382	1017	1487	1408	2	0	1	0	0	0	0	0

## Sheet: Female
Selected Unique Records
Continent	Country/Isolate	Dinucleotide transitions																Mutations												Cluster	Classification Targets
		AA	CC	GG	TT	AC	AG	AT	CG	CT	GT	TG	TC	TA	GC	GA	CA	AC	AG	AT	CG	CT	GT	TG	TC	TA	GC	GA	CA		C1	C2	C3	C4	C5	C6	C7
Africa	DZA_1	2833	875	1090	3208	2013	1730	2299	437	2068	1985	2582	1405	2365	1162	1601	2076	1593	1707	2899	1042	1856	1828	2042	1675	2863	1181	1770	1562	6	0	0	0	0	0	1	0
Africa	EGY_10	2830	882	1090	3207	2009	1734	2299	433	2063	1980	2579	1399	2365	1161	1604	2073	1609	1748	2813	1062	1691	1683	1691	1719	2779	1064	1742	1649	3	0	0	1	0	0	0	0
Africa	EGY_11	2845	882	1091	3217	2015	1736	2309	437	2075	1990	2590	1409	2376	1167	1605	2080	1653	1727	2864	1223	1648	2066	1827	1825	2913	1041	1669	1658	2	0	1	0	0	0	0	0
Africa	EGY_12	2845	881	1091	3215	2021	1735	2306	436	2076	1989	2589	1408	2373	1164	1607	2081	1645	1695	2876	1073	1915	1834	2053	1721	2840	1148	1840	1535	2	0	1	0	0	0	0	0
Africa	EGY_14	2845	883	1092	3212	2021	1737	2305	439	2078	1990	2588	1409	2375	1167	1607	2081	1623	1835	2773	1184	1716	2047	1788	1860	2883	1035	1725	1621	3	0	0	1	0	0	0	0
Africa	EGY_7	2845	882	1091	3210	2019	1737	2303	436	2075	1989	2587	1406	2372	1165	1606	2081	1575	1726	2858	1038	1833	1813	2063	1632	2799	1246	1768	1590	3	0	0	1	0	0	0	0
Africa	EGY_9	2838	879	1090	3202	2014	1733	2298	436	2070	1985	2584	1404	2367	1166	1602	2077	1659	1731	2849	1089	1684	1657	1680	1720	2791	1040	1794	1657	3	0	0	1	0	0	0	0
Africa	GHA_1	2182	658	821	2470	1579	1324	1786	340	1601	1531	1997	1078	1843	905	1222	1622	1260	1364	2110	832	1305	1295	1230	1306	2175	836	1300	1272	7	0	0	0	0	0	0	1
Africa	GMB_2	2812	871	1077	3164	1993	1716	2275	435	2049	1964	2560	1386	2340	1161	1588	2056	1597	1738	2696	1072	1663	1654	1602	1665	2733	1085	1671	1628	3	0	0	1	0	0	0	0
Africa	MDG_1	2849	887	1093	3216	2021	1740	2309	438	2080	1990	2590	1411	2378	1168	1610	2082	1601	1737	2902	1178	1680	2009	1888	1854	2847	1021	1773	1622	3	0	0	1	0	0	0	0
Africa	NGA_1	2844	886	1091	3218	2019	1741	2306	439	2079	1988	2586	1414	2374	1168	1609	2083	1600	1751	2975	1075	1835	1867	2018	1764	2889	1156	1822	1612	3	0	0	1	0	0	0	0
Africa	NGA_2	2846	884	1092	3214	2022	1738	2306	437	2079	1989	2589	1413	2372	1166	1609	2085	1572	1727	2862	1037	1837	1809	2069	1636	2799	1253	1771	1591	2	0	1	0	0	0	0	0
Africa	NGA_3	2840	880	1090	3204	2018	1736	2302	436	2077	1986	2585	1411	2369	1165	1606	2081	1599	1710	2901	1042	1858	1833	2040	1680	2868	1184	1775	1568	6	0	0	0	0	0	1	0
Africa	NGA_4	2846	887	1093	3217	2023	1739	2307	437	2080	1990	2589	1414	2374	1166	1609	2086	1623	1730	2855	1097	1675	1786	1718	1808	2788	1012	1747	1672	3	0	0	1	0	0	0	0
Africa	RWA_1	2606	808	993	2897	1855	1594	2097	404	1889	1831	2376	1274	2167	1067	1476	1902	1488	1609	2488	994	1548	1525	1480	1541	2540	1005	1553	1508	3	0	0	1	0	0	0	0
Africa	RWA_2	2144	661	823	2441	1525	1307	1749	337	1579	1523	1974	1061	1815	876	1217	1548	1236	1314	2075	829	1284	1277	1249	1273	2099	823	1297	1240	4	0	0	0	1	0	0	0
Africa	SEN_12	2766	864	1076	3124	1966	1699	2232	427	2024	1941	2522	1361	2315	1138	1568	2011	1645	1706	2758	1121	1685	2000	1859	1782	2802	989	1684	1611	7	0	0	0	0	0	0	1
Africa	SEN_13	2847	888	1093	3215	2022	1738	2306	439	2076	1991	2588	1410	2374	1166	1607	2084	1631	1796	2713	1082	1737	2111	1909	1879	2772	1019	1655	1712	3	0	0	1	0	0	0	0
Africa	SEN_15	2685	841	1025	3029	1913	1639	2159	416	1975	1882	2448	1331	2237	1105	1515	1958	1518	1679	2693	1011	1629	1558	1613	1586	2681	1065	1678	1519	3	0	0	1	0	0	0	0
Africa	SEN_16	2827	879	1090	3195	2006	1730	2287	436	2062	1979	2568	1396	2362	1157	1599	2062	1677	1739	2818	1142	1725	2032	1881	1821	2868	1002	1719	1643	7	0	0	0	0	0	0	1
Africa	SEN_17	2841	884	1091	3215	2019	1736	2304	437	2076	1989	2590	1407	2371	1167	1607	2080	1603	1719	2900	1110	1699	1706	1762	1749	2782	1054	1830	1604	6	0	0	0	0	0	1	0
Africa	SEN_18	2829	878	1091	3195	2007	1728	2292	438	2072	1980	2582	1401	2361	1167	1602	2063	1672	1741	2832	1147	1731	2030	1880	1830	2870	1009	1722	1641	7	0	0	0	0	0	0	1
Africa	SEN_19	2839	882	1090	3221	2017	1736	2304	438	2077	1992	2593	1408	2371	1167	1608	2077	1680	1752	2841	1145	1739	2043	1889	1835	2881	1012	1727	1653	7	0	0	0	0	0	0	1
Africa	SEN_2	2821	867	1080	3185	1999	1716	2282	426	2058	1974	2572	1392	2352	1154	1586	2063	1566	1746	2781	1126	1694	2062	1865	1826	2851	1003	1668	1583	3	0	0	1	0	0	0	0
Africa	SEN_24	2575	807	1000	2860	1820	1585	2070	406	1872	1814	2362	1279	2119	1064	1475	1884	1469	1635	2525	945	1648	1766	1786	1588	2564	1029	1562	1502	3	0	0	1	0	0	0	0
Africa	SEN_26	2770	865	1071	3134	1966	1703	2220	427	2033	1940	2515	1367	2315	1141	1564	2017	1645	1704	2761	1118	1697	1992	1855	1787	2800	992	1688	1618	7	0	0	0	0	0	0	1
Africa	SEN_28	2552	804	991	2905	1807	1564	2059	397	1895	1806	2328	1279	2151	1049	1435	1841	1488	1586	2543	959	1578	1804	1797	1568	2581	981	1547	1481	3	0	0	1	0	0	0	0
Africa	SEN_29	2752	855	1068	3116	1960	1688	2226	425	2015	1929	2510	1355	2306	1137	1560	2007	1607	1689	2759	972	1794	1835	1957	1637	2797	1090	1681	1573	3	0	0	1	0	0	0	0
Africa	SEN_3	2840	881	1091	3214	2017	1736	2302	438	2075	1988	2588	1407	2370	1167	1607	2077	1680	1750	2836	1145	1737	2041	1889	1834	2880	1011	1729	1652	7	0	0	0	0	0	0	1
Africa	SEN_30	2513	803	980	2885	1820	1546	2046	392	1883	1792	2330	1266	2130	1051	1425	1859	1460	1561	2587	938	1604	1660	1682	1584	2595	971	1557	1448	3	0	0	1	0	0	0	0
Africa	SEN_31	2594	813	1002	2936	1839	1571	2106	393	1888	1837	2380	1272	2175	1064	1449	1893	1440	1598	2592	939	1699	1689	1836	1606	2598	1041	1638	1446	3	0	0	1	0	0	0	0
Africa	SEN_33	2837	878	1087	3214	2017	1730	2294	438	2073	1981	2580	1403	2363	1166	1601	2074	1651	1773	2792	1158	1677	2058	1842	1773	2897	1024	1698	1619	3	0	0	1	0	0	0	0
Africa	SEN_39	2839	877	1091	3213	2013	1736	2303	437	2076	1983	2584	1409	2369	1167	1607	2075	1676	1747	2835	1144	1736	2038	1887	1833	2877	1010	1728	1651	7	0	0	0	0	0	0	1
Africa	SEN_4	2848	884	1093	3223	2021	1738	2306	437	2082	1991	2592	1408	2378	1168	1608	2079	2022	1739	2307	439	2085	1990	2589	1407	2376	1168	1608	2082	7	0	0	0	0	0	0	1
Africa	SEN_41	2847	887	1094	3221	2023	1740	2307	438	2079	1990	2590	1409	2376	1168	1610	2083	1658	1804	2851	988	1875	1976	2052	1700	2946	1118	1750	1617	7	0	0	0	0	0	0	1
Africa	SEN_46	2703	843	1042	3045	1921	1656	2173	408	1970	1897	2464	1326	2248	1105	1525	1974	1561	1678	2653	1032	1602	1632	1578	1610	2690	1009	1635	1558	2	0	1	0	0	0	0	0
Africa	SEN_47	2805	870	1074	3179	1984	1719	2271	438	2050	1975	2558	1389	2348	1155	1586	2042	1662	1735	2801	1131	1717	2015	1873	1811	2843	1001	1707	1638	3	0	0	1	0	0	0	0
Africa	SEN_48	2824	881	1085	3198	2011	1729	2284	436	2067	1977	2572	1401	2357	1160	1598	2068	1642	1767	2784	1156	1673	2051	1839	1775	2885	1023	1694	1612	3	0	0	1	0	0	0	0
Africa	SEN_49	2844	882	1092	3214	2019	1738	2304	438	2077	1986	2585	1410	2373	1166	1607	2080	1690	1717	2854	1045	1835	1897	2073	1671	2835	1146	1791	1633	2	0	1	0	0	0	0	0
Africa	SEN_5	2691	829	1053	3039	1920	1652	2183	410	1978	1895	2463	1330	2259	1100	1528	1962	1591	1662	2693	1097	1641	1947	1810	1744	2743	959	1649	1559	3	0	0	1	0	0	0	0
Africa	SEN_52	2345	785	929	2733	1749	1449	1951	373	1796	1706	2212	1194	2054	996	1335	1760	1413	1502	2458	970	1424	1787	1598	1572	2450	875	1432	1423	2	0	1	0	0	0	0	0
Africa	SEN_53	2845	884	1093	3223	2019	1738	2306	437	2075	1990	2591	1406	2374	1168	1608	2081	1614	1785	2792	1085	1781	1707	1664	1793	2811	1052	1772	1605	3	0	0	1	0	0	0	0
Africa	SEN_6	2831	873	1083	3201	2009	1723	2293	433	2071	1979	2578	1407	2358	1160	1594	2073	1643	1728	2814	1024	1729	1722	1750	1732	2779	1044	1734	1670	6	0	0	0	0	0	1	0
Africa	SEN_8	2745	857	1058	3115	1956	1693	2207	423	2024	1917	2498	1362	2289	1135	1562	2004	1634	1699	2739	1111	1690	1974	1832	1781	2775	979	1675	1607	7	0	0	0	0	0	0	1
Africa	SEN_9	2593	814	980	2901	1824	1563	2077	383	1878	1796	2351	1271	2127	1050	1452	1882	1491	1579	2511	1037	1578	1873	1701	1687	2615	900	1566	1469	2	0	1	0	0	0	0	0
Africa	TUN_1	2879	883	1093	3225	2017	1739	2313	438	2074	1993	2590	1410	2382	1164	1609	2079	1690	1718	2860	1045	1844	1900	2078	1670	2842	1145	1797	1634	6	0	0	0	0	0	1	0
Africa	TUN_10	2878	887	1093	3225	2022	1738	2310	438	2078	1990	2589	1413	2376	1164	1612	2083	1624	1727	2858	1096	1677	1788	1719	1805	2790	1012	1746	1674	4	0	0	0	1	0	0	0
Africa	TUN_11	2875	886	1093	3231	2021	1737	2316	437	2082	1986	2587	1412	2385	1165	1610	2079	2080	1611	2384	1165	1414	2590	1984	2077	2306	438	1741	2024	4	0	0	0	1	0	0	0
Africa	TUN_13	2873	879	1091	3203	2013	1731	2303	436	2070	1981	2584	1408	2361	1163	1607	2078	1557	1756	2943	1023	1846	1830	2034	1719	2864	1191	1798	1609	3	0	0	1	0	0	0	0
Africa	TUN_3	2878	884	1097	3224	2021	1739	2308	437	2081	1992	2592	1414	2376	1166	1610	2083	2024	1740	2312	439	2084	1994	2592	1410	2376	1166	1609	2084	7	0	0	0	0	0	0	1
Africa	TUN_4	2879	883	1093	3228	2020	1740	2311	438	2076	1995	2591	1412	2379	1165	1609	2083	2083	1611	2378	1167	1416	2590	1990	2073	2305	438	1741	2023	4	0	0	0	1	0	0	0
Africa	TUN_5	2877	885	1094	3221	2023	1737	2308	436	2080	1991	2592	1413	2374	1164	1611	2084	1695	1739	2794	1125	1777	1759	1755	1724	2845	1086	1777	1610	4	0	0	0	1	0	0	0
Africa	TUN_8	2882	882	1092	3229	2014	1742	2314	438	2075	1995	2591	1412	2381	1166	1610	2079	2079	1612	2380	1168	1416	2590	1990	2072	2305	438	1742	2023	4	0	0	0	1	0	0	0
Africa	TUN_9	2866	879	1081	3182	2010	1729	2293	436	2062	1975	2572	1402	2353	1159	1604	2073	1600	1706	2885	1106	1686	1694	1752	1736	2777	1055	1826	1608	7	0	0	0	0	0	0	1
Africa	ZAF_1	2851	886	1089	3221	2022	1741	2309	439	2079	1991	2590	1410	2379	1168	1611	2082	1617	1810	2799	1023	1709	1757	1627	1771	2861	998	1709	1659	6	0	0	0	0	0	1	0
Africa	ZAF_10	2843	881	1087	3216	2019	1738	2304	438	2080	1990	2589	1411	2374	1167	1607	2080	1652	1731	2829	1035	1734	1734	1760	1738	2787	1052	1742	1678	7	0	0	0	0	0	0	1
Africa	ZAF_1002	2881	885	1088	3225	2024	1741	2309	439	2079	1991	2590	1409	2380	1167	1612	2082	0	2	0	0	10	2	0	2	0	1	4	0	1	1	0	0	0	0	0	0
Africa	ZAF_1003	2846	887	1093	3220	2021	1741	2306	438	2079	1991	2589	1410	2377	1168	1608	2082	1655	1804	2852	988	1874	1976	2051	1701	2945	1118	1747	1617	7	0	0	0	0	0	0	1
Africa	ZAF_102	2616	800	987	3007	1858	1587	2145	395	1915	1838	2390	1294	2209	1056	1477	1900	1492	1626	2549	981	1548	1554	1494	1542	2568	1003	1558	1509	2	0	1	0	0	0	0	0
Africa	ZAF_107	2846	884	1092	3216	2021	1740	2305	438	2078	1991	2590	1411	2373	1167	1610	2083	1573	1729	2861	1039	1837	1811	2070	1636	2799	1251	1773	1590	2	0	1	0	0	0	0	0
Africa	ZAF_108	2657	828	1010	2947	1891	1633	2137	419	1927	1847	2414	1306	2191	1099	1521	1948	1579	1652	2603	1075	1621	1899	1745	1690	2680	972	1613	1550	2	0	1	0	0	0	0	0
Africa	ZAF_109	2846	886	1091	3219	2023	1740	2305	439	2080	1991	2589	1411	2376	1168	1608	2083	1671	1790	2855	1187	1674	2132	1861	1810	2986	1050	1656	1672	2	0	1	0	0	0	0	0
Africa	ZAF_11	2793	869	1075	3153	1984	1707	2260	431	2036	1963	2554	1381	2324	1148	1579	2045	1657	1726	2785	1134	1710	2007	1853	1800	2835	990	1703	1624	7	0	0	0	0	0	0	1
Africa	ZAF_110	2818	875	1081	3193	2009	1719	2288	436	2068	1969	2570	1400	2355	1162	1593	2067	1644	1785	2829	984	1861	1957	2031	1692	2921	1109	1734	1603	7	0	0	0	0	0	0	1
Africa	ZAF_112	2849	888	1089	3221	2024	1739	2304	438	2080	1991	2590	1408	2378	1168	1608	2082	1631	1795	2714	1083	1737	2115	1908	1879	2774	1019	1655	1712	7	0	0	0	0	0	0	1
Africa	ZAF_113	2847	884	1088	3220	2021	1738	2305	439	2076	1991	2588	1409	2375	1167	1607	2082	1654	1725	2864	1224	1650	2063	1826	1827	2914	1044	1670	1659	2	0	1	0	0	0	0	0
Africa	ZAF_118	2841	882	1092	3213	2019	1735	2305	439	2079	1989	2590	1408	2374	1167	1608	2076	1625	1788	2860	1011	1802	1903	2027	1640	2886	1178	1742	1638	6	0	0	0	0	0	1	0
Africa	ZAF_12	2847	886	1088	3218	2022	1739	2305	437	2083	1989	2590	1411	2376	1169	1607	2082	1602	1737	2901	1177	1681	2009	1886	1853	2845	1023	1772	1621	6	0	0	0	0	0	1	0
Africa	ZAF_120	2549	787	965	2915	1807	1544	2077	389	1852	1799	2351	1244	2136	1036	1447	1851	1419	1591	2624	951	1541	1463	1535	1514	2559	995	1597	1446	2	0	1	0	0	0	0	0
Africa	ZAF_121	2844	881	1087	3219	2019	1736	2306	439	2076	1990	2589	1409	2374	1166	1608	2080	1650	1732	2830	1033	1736	1733	1760	1738	2788	1052	1742	1679	7	0	0	0	0	0	0	1
Africa	ZAF_126	2847	885	1087	3219	2021	1737	2308	439	2078	1991	2590	1413	2375	1167	1608	2083	1626	1755	2872	1184	1715	2032	1876	1847	2887	1044	1744	1621	2	0	1	0	0	0	0	0
Africa	ZAF_127	2850	886	1091	3220	2025	1741	2306	440	2081	1989	2587	1411	2379	1168	1611	2083	1629	1797	2717	1083	1737	2114	1909	1881	2775	1021	1658	1712	7	0	0	0	0	0	0	1
Africa	ZAF_128	2669	811	1005	3001	1897	1600	2139	408	1930	1860	2418	1299	2207	1073	1491	1933	1524	1634	2588	1063	1606	1949	1765	1701	2675	934	1596	1491	2	0	1	0	0	0	0	0
Africa	ZAF_129	2841	879	1091	3217	2019	1735	2302	435	2079	1986	2588	1409	2370	1166	1606	2079	1606	1775	2892	1198	1675	2028	1838	1861	2881	1049	1736	1652	3	0	0	1	0	0	0	0
Africa	ZAF_13	2690	846	1033	3035	1945	1637	2172	418	1963	1910	2480	1319	2244	1102	1525	1981	1485	1673	2784	976	1756	1739	1934	1641	2714	1138	1693	1527	2	0	1	0	0	0	0	0
Africa	ZAF_130	2822	878	1077	3185	2002	1721	2275	434	2057	1975	2570	1390	2347	1161	1589	2063	1590	1756	2866	1190	1661	2010	1830	1848	2851	1043	1721	1641	2	0	1	0	0	0	0	0
Africa	ZAF_132	2880	884	1089	3220	2023	1742	2308	439	2079	1992	2589	1414	2376	1166	1612	2085	1657	1805	2852	988	1874	1977	2048	1702	2948	1117	1751	1619	7	0	0	0	0	0	0	1
Africa	ZAF_133	2795	864	1073	3158	1987	1712	2271	436	2047	1953	2553	1390	2328	1158	1592	2049	1654	1724	2797	1127	1711	2009	1863	1809	2833	999	1704	1631	7	0	0	0	0	0	0	1
Africa	ZAF_138	2844	886	1093	3220	2019	1740	2308	436	2080	1990	2588	1412	2379	1168	1605	2083	1694	1718	2856	1045	1841	1899	2075	1672	2839	1148	1792	1632	6	0	0	0	0	0	1	0
Africa	ZAF_14	2850	888	1090	3226	2023	1741	2306	438	2079	1990	2590	1407	2379	1168	1610	2081	2022	1741	2308	439	2082	1991	2588	1408	2377	1169	1611	2083	7	0	0	0	0	0	0	1
Africa	ZAF_143	2845	883	1087	3221	2017	1739	2305	438	2076	1989	2588	1406	2376	1167	1609	2076	1603	1775	2897	1198	1677	2031	1842	1864	2886	1049	1737	1652	3	0	0	1	0	0	0	0
Africa	ZAF_144	2838	881	1085	3211	2018	1738	2301	439	2073	1991	2587	1406	2371	1167	1606	2080	1597	1710	2904	1043	1857	1834	2041	1680	2866	1183	1775	1568	2	0	1	0	0	0	0	0
Africa	ZAF_146	2875	883	1087	3215	2020	1737	2304	439	2077	1991	2590	1409	2372	1167	1608	2081	1616	1734	2885	1040	1847	1845	2027	1682	2870	1152	1812	1570	6	0	0	0	0	0	1	0
Africa	ZAF_147	2879	885	1096	3226	2021	1739	2309	437	2080	1991	2588	1410	2383	1168	1606	2081	2021	1740	2313	438	2083	1991	2588	1409	2377	1168	1609	2084	7	0	0	0	0	0	0	1
Africa	ZAF_149	2844	881	1088	3216	2018	1738	2305	438	2080	1989	2589	1409	2376	1168	1607	2078	1652	1732	2828	1034	1733	1735	1760	1737	2787	1050	1742	1679	7	0	0	0	0	0	0	1
Africa	ZAF_150	2847	874	1087	3208	2003	1727	2295	436	2058	1981	2573	1397	2364	1162	1593	2066	1669	1745	2826	1139	1729	2035	1875	1827	2872	1001	1724	1649	7	0	0	0	0	0	0	1
Africa	ZAF_152	2842	880	1088	3214	2021	1736	2303	439	2079	1989	2590	1408	2373	1167	1609	2077	1681	1752	2836	1144	1738	2044	1889	1836	2881	1012	1729	1655	7	0	0	0	0	0	0	1
Africa	ZAF_153	2847	889	1094	3220	2021	1741	2307	436	2079	1990	2591	1409	2377	1169	1609	2084	1631	1795	2715	1082	1739	2116	1912	1882	2772	1017	1656	1712	7	0	0	0	0	0	0	1
Africa	ZAF_154	2843	883	1090	3214	2020	1738	2303	439	2078	1989	2588	1410	2372	1168	1608	2080	1611	1754	2803	1085	1737	1675	1656	1742	2811	1069	1749	1603	3	0	0	1	0	0	0	0
Africa	ZAF_160	2833	877	1083	3211	2015	1727	2293	433	2071	1982	2580	1404	2362	1160	1597	2075	1671	1740	2835	1138	1732	2030	1882	1832	2877	1007	1722	1644	7	0	0	0	0	0	0	1
Africa	ZAF_164	2840	883	1089	3213	2018	1735	2303	437	2079	1989	2585	1413	2374	1165	1603	2079	1687	1722	2761	1094	1790	1627	1710	1693	2766	1083	1822	1580	7	0	0	0	0	0	0	1
Africa	ZAF_165	2844	884	1086	3218	2019	1737	2307	439	2076	1990	2588	1409	2375	1166	1608	2079	1605	1717	2901	1110	1701	1706	1762	1749	2785	1055	1832	1604	7	0	0	0	0	0	0	1
Africa	ZAF_166	2678	823	1013	3032	1905	1614	2175	409	1945	1880	2449	1314	2239	1083	1508	1948	1497	1698	2612	1075	1625	1975	1734	1759	2702	948	1583	1515	3	0	0	1	0	0	0	0
Africa	ZAF_169	2848	887	1089	3221	2022	1740	2306	437	2080	1991	2591	1409	2377	1168	1608	2082	1656	1803	2851	988	1876	1978	2050	1703	2945	1117	1748	1617	7	0	0	0	0	0	0	1
Africa	ZAF_17	2830	872	1075	3203	2008	1725	2296	433	2068	1981	2573	1407	2363	1155	1596	2069	1595	1705	2892	1102	1687	1696	1749	1738	2773	1048	1818	1596	7	0	0	0	0	0	0	1
Africa	ZAF_172	2847	884	1091	3223	2022	1739	2308	438	2078	1991	2590	1411	2376	1166	1609	2083	1656	1803	2851	987	1876	1979	2050	1702	2945	1114	1748	1617	7	0	0	0	0	0	0	1
Africa	ZAF_176	2824	877	1075	3188	1998	1722	2283	434	2064	1968	2558	1403	2353	1153	1592	2057	1668	1733	2809	1129	1724	2023	1871	1817	2862	1008	1712	1638	2	0	1	0	0	0	0	0
Africa	ZAF_179	2855	887	1089	3223	2022	1742	2308	437	2079	1992	2591	1408	2381	1167	1611	2081	1629	1796	2717	1083	1738	2117	1910	1878	2775	1019	1657	1713	7	0	0	0	0	0	0	1
Africa	ZAF_185	2827	876	1080	3204	2006	1731	2297	438	2064	1986	2577	1403	2366	1159	1601	2066	1666	1747	2832	1140	1730	2036	1878	1829	2867	1007	1721	1649	7	0	0	0	0	0	0	1
Africa	ZAF_186	2614	805	1008	2947	1861	1593	2137	419	1914	1817	2405	1301	2160	1101	1499	1930	1553	1629	2616	1071	1597	1883	1727	1703	2655	942	1611	1533	2	0	1	0	0	0	0	0
Africa	ZAF_187	2838	872	1071	3178	1995	1712	2275	434	2057	1958	2550	1394	2343	1152	1588	2049	1602	1695	2844	970	1856	1812	2048	1653	2807	1166	1753	1602	3	0	0	1	0	0	0	0
Africa	ZAF_189	2848	886	1090	3222	2020	1741	2307	440	2078	1992	2588	1413	2376	1167	1610	2082	1656	1804	2851	989	1874	1977	2049	1701	2946	1117	1749	1616	7	0	0	0	0	0	0	1
Africa	ZAF_19	2845	883	1087	3218	2019	1737	2306	438	2079	1989	2588	1411	2375	1167	1606	2081	1613	1733	2889	1040	1847	1845	2024	1685	2860	1153	1805	1567	7	0	0	0	0	0	0	1
Africa	ZAF_193	2843	882	1088	3223	2017	1736	2308	438	2079	1987	2587	1411	2375	1169	1605	2080	1606	1720	2900	1109	1700	1708	1758	1748	2785	1053	1832	1603	7	0	0	0	0	0	0	1
Africa	ZAF_194	2872	881	1090	3212	2018	1734	2299	439	2073	1983	2582	1406	2366	1165	1606	2077	1605	1715	2892	1109	1695	1703	1763	1744	2790	1052	1837	1605	7	0	0	0	0	0	0	1
Africa	ZAF_196	2847	886	1094	3224	2022	1741	2305	437	2079	1992	2591	1409	2377	1167	1610	2082	2022	1742	2307	438	2083	1991	2589	1408	2376	1167	1610	2083	7	0	0	0	0	0	0	1
Africa	ZAF_2	2848	887	1090	3219	2023	1740	2305	438	2080	1991	2590	1410	2376	1168	1608	2083	1655	1803	2852	988	1874	1976	2050	1703	2945	1118	1748	1617	7	0	0	0	0	0	0	1
Africa	ZAF_20	2883	885	1091	3221	2024	1740	2307	439	2082	1989	2588	1411	2379	1168	1610	2082	1618	1809	2799	1023	1708	1757	1626	1771	2862	998	1708	1660	4	0	0	0	1	0	0	0
Africa	ZAF_203	2779	855	1060	3137	1962	1687	2256	424	2033	1935	2527	1373	2325	1143	1560	2024	1568	1669	2833	1015	1813	1797	1990	1637	2809	1153	1735	1528	2	0	1	0	0	0	0	0
Africa	ZAF_207	2842	881	1087	3217	2018	1738	2304	439	2080	1991	2588	1411	2376	1167	1606	2077	1681	1751	2839	1144	1738	2044	1888	1836	2883	1012	1728	1654	7	0	0	0	0	0	0	1
Africa	ZAF_208	2649	821	1004	2980	1877	1607	2135	412	1918	1857	2410	1290	2205	1083	1485	1928	1442	1617	2734	956	1722	1699	1905	1602	2677	1116	1665	1482	3	0	0	1	0	0	0	0
Africa	ZAF_213	2816	874	1072	3193	2007	1710	2285	431	2050	1972	2561	1388	2358	1142	1588	2057	1611	1757	2825	1083	1742	1685	1659	1720	2871	1089	1734	1588	3	0	0	1	0	0	0	0
Africa	ZAF_217	2842	879	1089	3219	2020	1735	2305	437	2080	1986	2590	1409	2372	1168	1608	2079	1681	1751	2838	1145	1739	2044	1887	1837	2881	1012	1729	1654	7	0	0	0	0	0	0	1
Africa	ZAF_218	2844	886	1094	3218	2020	1741	2303	437	2079	1991	2588	1411	2375	1168	1606	2083	1611	1814	2911	1159	1620	2062	1825	1791	2970	1028	1706	1655	3	0	0	1	0	0	0	0
Africa	ZAF_22	2848	886	1089	3221	2021	1740	2306	438	2079	1991	2589	1410	2377	1168	1608	2081	1655	1803	2853	987	1874	1977	2049	1702	2945	1117	1748	1617	7	0	0	0	0	0	0	1
Africa	ZAF_223	2845	888	1088	3221	2025	1738	2304	438	2080	1990	2590	1408	2376	1168	1608	2083	1628	1756	2871	1184	1715	2031	1875	1848	2887	1044	1744	1621	2	0	1	0	0	0	0	0
Africa	ZAF_224	2850	886	1088	3219	2021	1740	2306	439	2077	1991	2588	1413	2374	1167	1609	2085	1690	1727	2765	1095	1793	1627	1712	1695	2773	1084	1827	1584	6	0	0	0	0	0	1	0
Africa	ZAF_225	2749	851	1050	3112	1951	1678	2228	422	2013	1916	2500	1369	2289	1124	1559	2006	1568	1709	2633	1038	1630	1627	1568	1629	2697	1060	1636	1577	3	0	0	1	0	0	0	0
Africa	ZAF_226	2849	884	1091	3217	2022	1738	2306	439	2081	1991	2590	1411	2377	1168	1608	2081	1627	1796	2718	1083	1736	2114	1909	1879	2773	1020	1655	1712	7	0	0	0	0	0	0	1
Africa	ZAF_23	2847	885	1089	3219	2022	1738	2306	439	2077	1990	2589	1409	2376	1168	1608	2082	1563	1731	2827	1071	1719	1702	1681	1749	2810	1082	1702	1609	7	0	0	0	0	0	0	1
Africa	ZAF_232	2855	875	1082	3190	2010	1730	2288	436	2069	1974	2573	1401	2355	1167	1599	2072	1615	1724	2860	978	1870	1817	2054	1654	2838	1183	1760	1616	6	0	0	0	0	0	1	0
Africa	ZAF_237	2844	887	1094	3221	2021	1740	2304	436	2078	1992	2589	1408	2377	1167	1606	2082	1622	1732	2853	1096	1677	1784	1715	1804	2787	1012	1745	1671	2	0	1	0	0	0	0	0
Africa	ZAF_238	2876	880	1089	3218	2020	1737	2306	439	2081	1987	2588	1410	2376	1167	1610	2076	1681	1751	2838	1144	1738	2043	1889	1836	2895	1013	1736	1662	7	0	0	0	0	0	0	1
Africa	ZAF_239	2848	887	1093	3219	2023	1741	2305	439	2080	1991	2588	1411	2377	1168	1608	2083	0	2	0	0	4	0	1	1	0	1	2	0	1	1	0	0	0	0	0	0
Africa	ZAF_24	2842	881	1086	3216	2018	1736	2305	440	2076	1989	2588	1411	2370	1166	1609	2079	1681	1751	2836	1146	1737	2043	1885	1834	2883	1013	1729	1653	7	0	0	0	0	0	0	1
Africa	ZAF_240	2874	882	1089	3218	2018	1737	2304	435	2073	1986	2583	1408	2372	1163	1606	2080	1604	1714	2898	1109	1698	1704	1762	1747	2793	1053	1835	1608	7	0	0	0	0	0	0	1
Africa	ZAF_242	2849	887	1090	3224	2023	1739	2306	438	2079	1990	2588	1411	2376	1166	1608	2083	1618	1809	2799	1022	1710	1756	1625	1771	2862	998	1706	1659	6	0	0	0	0	0	1	0
Africa	ZAF_243	2874	880	1086	3214	2019	1737	2302	439	2080	1985	2585	1409	2372	1168	1607	2078	1624	1782	2863	1009	1800	1899	2028	1639	2894	1180	1749	1645	6	0	0	0	0	0	1	0
Africa	ZAF_244	2846	886	1094	3223	2018	1740	2308	437	2076	1992	2587	1411	2379	1167	1605	2082	1629	1798	2716	1080	1739	2114	1909	1877	2772	1018	1655	1712	7	0	0	0	0	0	0	1
Africa	ZAF_245	2848	887	1088	3223	2023	1742	2307	437	2079	1992	2592	1407	2379	1166	1612	2080	1668	1790	2859	1187	1673	2136	1860	1811	2989	1046	1657	1673	7	0	0	0	0	0	0	1
Africa	ZAF_25	2847	884	1090	3219	2022	1738	2305	438	2079	1992	2590	1413	2374	1166	1608	2084	1602	1747	2975	1075	1838	1868	2019	1765	2889	1154	1821	1612	2	0	1	0	0	0	0	0
Africa	ZAF_254	2775	860	1067	3127	1971	1696	2237	432	2035	1947	2528	1372	2317	1151	1558	2031	1612	1696	2757	1015	1700	1682	1706	1697	2723	1029	1704	1629	2	0	1	0	0	0	0	0
Africa	ZAF_255	2530	801	989	2875	1846	1557	2078	411	1871	1798	2337	1279	2127	1063	1449	1901	1463	1546	2610	1027	1533	1544	1579	1602	2496	961	1636	1469	2	0	1	0	0	0	0	0
Africa	ZAF_256	2876	882	1087	3221	2020	1741	2307	439	2078	1992	2589	1412	2376	1168	1608	2084	1670	1739	2855	1058	1736	1723	1681	1766	2861	1004	1757	1655	2	0	1	0	0	0	0	0
Africa	ZAF_257	2875	885	1094	3223	2020	1741	2310	437	2080	1992	2590	1412	2380	1167	1609	2082	1670	1791	2859	1190	1673	2135	1859	1808	2989	1048	1658	1671	4	0	0	0	1	0	0	0
Africa	ZAF_26	2724	852	1049	3087	1954	1669	2204	423	1990	1927	2501	1335	2285	1120	1544	1999	1586	1700	2666	1110	1654	2017	1840	1757	2738	968	1647	1552	2	0	1	0	0	0	0	0
Africa	ZAF_260	2845	887	1092	3217	2021	1739	2306	438	2078	1990	2589	1410	2376	1168	1608	2082	1694	1718	2854	1046	1839	1899	2075	1673	2839	1148	1792	1633	6	0	0	0	0	0	1	0
Africa	ZAF_262	2851	886	1091	3215	2022	1740	2310	438	2085	1989	2590	1414	2380	1169	1610	2082	0	1	1	0	7	2	0	5	0	1	2	0	1	1	0	0	0	0	0	0
Africa	ZAF_263	2822	867	1075	3185	1995	1721	2289	437	2056	1968	2566	1394	2352	1160	1595	2057	1657	1741	2816	1134	1721	2020	1864	1819	2850	1002	1718	1646	7	0	0	0	0	0	0	1
Africa	ZAF_265	2835	882	1087	3218	2016	1733	2306	437	2071	1985	2584	1402	2376	1167	1601	2078	0	1	0	0	7	3	0	0	1	2	3	0	7	0	0	0	0	0	0	1
Africa	ZAF_266	2846	885	1092	3217	2019	1742	2305	436	2079	1991	2589	1410	2376	1167	1608	2081	2019	1741	2307	438	2081	1990	2587	1410	2375	1167	1608	2082	7	0	0	0	0	0	0	1
Africa	ZAF_267	2846	885	1089	3221	2022	1740	2308	439	2078	1990	2588	1409	2380	1168	1609	2081	1629	1794	2716	1081	1738	2116	1910	1879	2774	1017	1656	1710	7	0	0	0	0	0	0	1
Africa	ZAF_269	2863	880	1092	3221	2015	1732	2305	437	2075	1988	2587	1405	2376	1168	1600	2075	1620	1785	2865	1010	1800	1899	2024	1637	2895	1180	1746	1640	6	0	0	0	0	0	1	0
Africa	ZAF_270	2848	886	1089	3222	2023	1739	2306	437	2078	1994	2589	1412	2377	1164	1607	2084	1657	1803	2850	986	1874	1979	2048	1701	2945	1115	1748	1618	7	0	0	0	0	0	0	1
Africa	ZAF_271	2840	882	1085	3213	2017	1736	2306	439	2077	1991	2589	1410	2374	1167	1606	2079	1603	1772	2867	1066	1718	1641	1699	1674	2838	1112	1788	1612	2	0	1	0	0	0	0	0
Africa	ZAF_274	2742	848	1053	3064	1947	1672	2216	416	1999	1917	2512	1345	2274	1136	1547	2012	1559	1647	2783	1041	1678	1583	1618	1662	2802	1030	1665	1551	2	0	1	0	0	0	0	0
Africa	ZAF_278	2732	853	1067	3124	1956	1675	2254	427	2015	1938	2533	1360	2313	1144	1554	2015	1599	1688	2743	1004	1696	1688	1718	1690	2712	1023	1688	1627	2	0	1	0	0	0	0	0
Africa	ZAF_28	2845	885	1094	3224	2021	1741	2305	437	2079	1992	2588	1411	2378	1166	1608	2082	1562	1733	2829	1073	1719	1703	1681	1749	2811	1082	1701	1609	6	0	0	0	0	0	1	0
Africa	ZAF_285	2846	876	1092	3210	2019	1733	2301	435	2078	1987	2589	1408	2370	1167	1604	2081	1569	1726	2857	1037	1834	1811	2067	1631	2796	1247	1772	1587	3	0	0	1	0	0	0	0
Africa	ZAF_292	2847	884	1088	3216	2020	1738	2306	438	2079	1989	2590	1409	2376	1168	1608	2080	1628	1785	2844	1073	1724	1653	1647	1710	2855	1105	1749	1653	2	0	1	0	0	0	0	0
Africa	ZAF_293	2841	883	1086	3219	2017	1735	2307	437	2076	1988	2592	1406	2372	1167	1609	2077	1681	1750	2837	1144	1740	2044	1889	1833	2881	1012	1730	1653	7	0	0	0	0	0	0	1
Africa	ZAF_294	2846	883	1087	3214	2022	1737	2304	439	2077	1989	2589	1410	2371	1167	1608	2083	1607	1776	2894	1195	1677	2028	1841	1865	2888	1049	1737	1651	3	0	0	1	0	0	0	0
Africa	ZAF_298	2848	886	1087	3221	2022	1739	2307	438	2078	1989	2589	1412	2374	1167	1609	2085	1565	1730	2828	1071	1718	1704	1681	1752	2810	1079	1704	1609	6	0	0	0	0	0	1	0
Africa	ZAF_3	2842	882	1088	3216	2018	1737	2303	438	2076	1989	2587	1408	2373	1167	1606	2079	1585	1764	2800	1137	1715	2084	1876	1840	2870	1014	1682	1595	3	0	0	1	0	0	0	0
Africa	ZAF_30	2843	881	1088	3215	2019	1737	2304	439	2079	1989	2589	1411	2371	1168	1608	2080	1623	1788	2862	1009	1802	1901	2027	1642	2886	1180	1743	1639	6	0	0	0	0	0	1	0
Africa	ZAF_302	2874	881	1085	3222	2020	1738	2305	438	2076	1992	2588	1411	2374	1164	1607	2081	1680	1751	2840	1143	1738	2043	1887	1835	2895	1013	1735	1662	7	0	0	0	0	0	0	1
Africa	ZAF_303	2849	887	1089	3220	2023	1739	2306	439	2080	1991	2589	1411	2377	1168	1608	2083	0	1	0	0	3	1	0	0	0	1	2	0	1	1	0	0	0	0	0	0
Africa	ZAF_304	2844	889	1089	3219	2024	1739	2302	440	2078	1991	2588	1409	2374	1169	1607	2083	1605	1734	2901	1177	1680	2008	1889	1853	2843	1022	1772	1621	6	0	0	0	0	0	1	0
Africa	ZAF_306	2845	882	1089	3216	2019	1739	2305	438	2080	1990	2591	1411	2373	1168	1610	2081	1614	1735	2888	1042	1847	1846	2027	1684	2861	1152	1805	1569	6	0	0	0	0	0	1	0
Africa	ZAF_307	2712	849	1041	3110	1937	1661	2209	418	2012	1920	2482	1368	2290	1118	1525	1992	1581	1682	2671	1107	1657	2023	1823	1766	2758	960	1635	1544	2	0	1	0	0	0	0	0
Africa	ZAF_308	2732	848	1051	3120	1952	1651	2240	425	1995	1926	2504	1352	2304	1112	1541	1997	1573	1701	2706	1092	1660	2017	1842	1758	2754	973	1656	1556	2	0	1	0	0	0	0	0
Africa	ZAF_31	2844	882	1088	3216	2019	1738	2305	438	2079	1990	2589	1410	2375	1167	1607	2079	1619	1727	2881	983	1882	1831	2068	1669	2846	1186	1762	1615	2	0	1	0	0	0	0	0
Africa	ZAF_311	2567	808	1002	2902	1845	1592	2074	382	1898	1808	2349	1280	2146	1049	1470	1892	1517	1626	2581	903	1708	1791	1882	1531	2661	1017	1594	1462	2	0	1	0	0	0	0	0
Africa	ZAF_312	2742	849	1056	3099	1956	1673	2237	432	1995	1936	2508	1365	2295	1128	1550	2020	1518	1685	2844	992	1799	1778	1990	1679	2755	1155	1741	1559	2	0	1	0	0	0	0	0
Africa	ZAF_313	2844	884	1088	3216	2020	1738	2304	439	2078	1991	2590	1410	2373	1167	1608	2080	1606	1719	2900	1111	1700	1705	1763	1749	2784	1056	1833	1604	7	0	0	0	0	0	0	1
Africa	ZAF_314	2853	886	1090	3217	2022	1739	2306	437	2081	1992	2591	1411	2378	1167	1607	2082	2021	1739	2307	438	2084	1991	2589	1411	2378	1168	1609	2083	7	0	0	0	0	0	0	1
Africa	ZAF_318	2802	863	1071	3157	1995	1715	2263	433	2048	1963	2554	1374	2346	1152	1587	2041	1597	1703	2835	966	1852	1805	2047	1641	2797	1169	1739	1595	3	0	0	1	0	0	0	0
Africa	ZAF_319	2846	886	1095	3222	2020	1743	2304	437	2080	1992	2589	1411	2376	1169	1608	2083	1656	1804	2852	987	1876	1976	2054	1701	2944	1118	1748	1617	7	0	0	0	0	0	0	1
Africa	ZAF_321	2880	887	1095	3218	2024	1740	2306	437	2082	1992	2592	1409	2379	1167	1610	2081	1618	1811	2798	1023	1708	1758	1628	1772	2860	996	1707	1660	7	0	0	0	0	0	0	1
Africa	ZAF_324	2849	885	1093	3219	2023	1740	2306	437	2082	1991	2593	1410	2377	1168	1610	2082	1629	1798	2717	1083	1737	2114	1911	1878	2773	1020	1657	1712	7	0	0	0	0	0	0	1
Africa	ZAF_327	2848	885	1088	3222	2022	1740	2306	442	2079	1990	2585	1412	2377	1168	1609	2081	1657	1802	2851	987	1875	1976	2049	1701	2945	1118	1748	1617	7	0	0	0	0	0	0	1
Africa	ZAF_329	2849	887	1089	3221	2023	1738	2307	439	2078	1991	2589	1409	2378	1167	1608	2082	1655	1802	2852	987	1874	1977	2049	1703	2945	1117	1748	1618	7	0	0	0	0	0	0	1
Africa	ZAF_33	2729	845	1035	3054	1950	1651	2211	426	1997	1898	2486	1350	2270	1127	1536	2003	1547	1644	2767	1068	1621	1645	1692	1682	2667	1012	1751	1548	3	0	0	1	0	0	0	0
Africa	ZAF_330	2847	886	1089	3226	2022	1740	2307	439	2078	1990	2588	1408	2379	1168	1610	2081	1624	1729	2856	1095	1679	1784	1718	1804	2789	1013	1747	1674	2	0	1	0	0	0	0	0
Africa	ZAF_331	2797	863	1067	3159	1991	1698	2269	434	2055	1946	2550	1391	2330	1155	1581	2048	1559	1788	2835	1125	1717	1975	1817	1801	2901	1091	1671	1608	2	0	1	0	0	0	0	0
Africa	ZAF_333	2834	880	1079	3193	2008	1725	2286	435	2066	1980	2579	1397	2355	1165	1595	2069	1563	1713	2841	1036	1827	1800	2055	1623	2782	1244	1757	1581	3	0	0	1	0	0	0	0
Africa	ZAF_335	2810	862	1062	3162	1960	1700	2257	430	2028	1946	2524	1380	2326	1137	1569	2022	1637	1716	2781	1117	1706	1996	1836	1794	2832	985	1701	1612	2	0	1	0	0	0	0	0
Africa	ZAF_339	2831	880	1085	3204	2010	1727	2289	436	2066	1976	2572	1403	2356	1161	1599	2071	1589	1730	2887	1168	1668	1997	1872	1844	2830	1017	1761	1613	6	0	0	0	0	0	1	0
Africa	ZAF_34	2848	886	1089	3219	2023	1740	2305	439	2079	1993	2590	1411	2376	1167	1608	2083	1656	1804	2850	988	1874	1978	2049	1703	2945	1116	1748	1617	7	0	0	0	0	0	0	1
Africa	ZAF_341	2842	881	1085	3220	2018	1735	2306	438	2077	1988	2587	1412	2371	1165	1607	2080	1681	1750	2837	1143	1739	2044	1885	1834	2882	1013	1729	1654	7	0	0	0	0	0	0	1
Africa	ZAF_343	2847	885	1087	3227	2022	1738	2309	438	2080	1988	2589	1408	2380	1168	1609	2080	1655	1800	2854	986	1877	1977	2049	1701	2945	1117	1748	1617	7	0	0	0	0	0	0	1
Africa	ZAF_345	2840	880	1086	3219	2017	1738	2308	439	2077	1988	2588	1408	2377	1168	1609	2076	1681	1752	2839	1144	1738	2044	1888	1833	2882	1012	1730	1655	7	0	0	0	0	0	0	1
Africa	ZAF_349	2844	881	1087	3217	2021	1736	2306	437	2080	1989	2590	1412	2372	1166	1608	2082	1605	1719	2901	1110	1699	1708	1761	1749	2786	1055	1832	1604	7	0	0	0	0	0	0	1
Africa	ZAF_35	2840	879	1088	3220	2017	1737	2303	437	2077	1989	2591	1408	2369	1168	1608	2079	1681	1752	2838	1145	1740	2044	1888	1835	2879	1012	1729	1653	7	0	0	0	0	0	0	1
Africa	ZAF_351	2855	885	1089	3220	2022	1738	2309	437	2078	1990	2592	1411	2375	1167	1610	2085	1691	1727	2764	1095	1794	1627	1714	1693	2773	1084	1831	1585	6	0	0	0	0	0	1	0
Africa	ZAF_352	2844	880	1089	3211	2018	1735	2303	438	2077	1989	2590	1407	2371	1166	1608	2077	1584	1763	2800	1138	1716	2082	1876	1839	2872	1013	1681	1594	3	0	0	1	0	0	0	0
Africa	ZAF_353	2822	880	1091	3188	2004	1725	2288	436	2063	1975	2575	1396	2356	1166	1595	2068	1590	1739	2947	1072	1821	1854	2005	1746	2859	1151	1810	1602	2	0	1	0	0	0	0	0
Africa	ZAF_355	2848	885	1087	3217	2021	1738	2307	438	2079	1990	2590	1412	2374	1167	1609	2083	1689	1725	2764	1094	1794	1627	1713	1695	2769	1084	1826	1584	6	0	0	0	0	0	1	0
Africa	ZAF_357	2849	887	1091	3218	2024	1739	2304	439	2082	1992	2590	1411	2378	1167	1608	2081	2023	1740	2306	440	2082	1991	2588	1410	2377	1169	1609	2082	7	0	0	0	0	0	0	1
Africa	ZAF_359	2858	867	1080	3188	2003	1717	2287	436	2063	1963	2569	1394	2349	1162	1596	2060	1615	1774	2817	1065	1712	1637	1632	1691	2835	1099	1743	1644	2	0	1	0	0	0	0	0
Africa	ZAF_36	2843	881	1088	3218	2018	1737	2304	438	2082	1990	2591	1408	2377	1167	1608	2074	1651	1732	2829	1035	1735	1735	1761	1736	2786	1051	1742	1677	7	0	0	0	0	0	0	1
Africa	ZAF_360	2584	806	989	2913	1860	1568	2101	414	1889	1821	2378	1268	2162	1085	1455	1908	1529	1610	2579	1052	1586	1872	1710	1690	2622	925	1588	1511	2	0	1	0	0	0	0	0
Africa	ZAF_363	2841	880	1092	3217	2019	1735	2305	438	2080	1988	2590	1410	2373	1168	1607	2080	1651	1734	2828	1036	1734	1734	1758	1739	2787	1051	1741	1677	7	0	0	0	0	0	0	1
Africa	ZAF_37	2842	882	1092	3218	2019	1740	2304	438	2079	1989	2590	1408	2374	1168	1611	2078	1610	1754	2804	1087	1738	1675	1657	1739	2812	1070	1749	1602	3	0	0	1	0	0	0	0
Africa	ZAF_373	2843	882	1092	3220	2020	1735	2305	439	2074	1990	2589	1406	2374	1166	1607	2079	1604	1719	2900	1109	1703	1703	1763	1746	2785	1056	1830	1604	7	0	0	0	0	0	0	1
Africa	ZAF_374	2848	887	1094	3220	2021	1742	2306	438	2079	1991	2589	1410	2378	1168	1610	2082	1629	1797	2716	1083	1737	2115	1911	1880	2773	1018	1657	1712	7	0	0	0	0	0	0	1
Africa	ZAF_375	2836	880	1086	3202	2013	1733	2301	437	2072	1983	2585	1403	2369	1169	1603	2075	1688	1636	2870	1088	1666	1679	1754	1635	2823	1047	1751	1620	2	0	1	0	0	0	0	0
Africa	ZAF_376	2705	826	1028	3033	1913	1639	2190	425	1964	1880	2457	1335	2242	1118	1521	1977	1549	1669	2637	1083	1630	1976	1801	1727	2712	959	1620	1526	2	0	1	0	0	0	0	0
Africa	ZAF_377	2663	810	1000	3014	1863	1632	2177	406	1937	1866	2432	1312	2231	1097	1507	1929	1507	1667	2695	939	1690	1783	1909	1537	2693	1088	1639	1524	2	0	1	0	0	0	0	0
Africa	ZAF_378	2845	882	1087	3218	2018	1736	2307	440	2078	1989	2588	1413	2373	1167	1607	2081	1615	1732	2889	1040	1847	1846	2026	1684	2860	1152	1805	1567	6	0	0	0	0	0	1	0
Africa	ZAF_379	2763	860	1060	3158	1989	1690	2254	433	2032	1947	2527	1378	2328	1137	1566	2039	1535	1776	2820	1123	1713	1965	1800	1803	2890	1082	1657	1585	2	0	1	0	0	0	0	0
Africa	ZAF_38	2706	850	1042	3092	1944	1659	2203	426	1999	1919	2495	1349	2276	1123	1538	1993	1579	1700	2705	1125	1629	1959	1749	1753	2785	1009	1604	1578	2	0	1	0	0	0	0	0
Africa	ZAF_380	2847	886	1091	3218	2023	1739	2306	439	2081	1990	2591	1411	2376	1168	1610	2082	1565	1733	2826	1070	1719	1703	1684	1751	2810	1081	1702	1611	6	0	0	0	0	0	1	0
Africa	ZAF_381	2850	885	1090	3218	2022	1739	2307	439	2081	1990	2589	1412	2378	1168	1608	2082	1629	1795	2716	1083	1737	2115	1909	1880	2775	1019	1655	1712	7	0	0	0	0	0	0	1
Africa	ZAF_383	2666	814	1008	3026	1891	1622	2153	409	1952	1861	2409	1319	2237	1092	1489	1941	1568	1641	2664	1062	1623	1903	1759	1723	2697	949	1618	1552	7	0	0	0	0	0	0	1
Africa	ZAF_388	2837	879	1087	3216	2018	1734	2301	438	2079	1984	2587	1406	2371	1168	1607	2075	1680	1751	2833	1145	1736	2042	1885	1834	2876	1012	1727	1654	7	0	0	0	0	0	0	1
Africa	ZAF_39	2827	873	1078	3158	1998	1712	2272	434	2039	1964	2559	1377	2339	1153	1589	2054	1997	1713	2274	434	2043	1964	2558	1376	2334	1155	1590	2061	2	0	1	0	0	0	0	0
Africa	ZAF_390	2553	798	993	2904	1854	1590	2096	405	1900	1827	2362	1280	2177	1070	1460	1896	1452	1577	2605	1033	1582	1582	1614	1588	2559	996	1643	1433	2	0	1	0	0	0	0	0
Africa	ZAF_391	2856	876	1089	3210	2007	1730	2297	436	2066	1980	2575	1401	2367	1163	1597	2070	1635	1758	2777	1142	1700	2087	1894	1812	2850	999	1710	1617	2	0	1	0	0	0	0	0
Africa	ZAF_395	2848	883	1087	3220	2019	1737	2309	438	2076	1990	2590	1410	2376	1167	1608	2081	1609	1809	2914	1158	1618	2063	1824	1788	2970	1025	1707	1656	3	0	0	1	0	0	0	0
Africa	ZAF_396	2842	881	1087	3219	2018	1736	2306	438	2078	1989	2591	1412	2370	1167	1608	2082	1652	1732	2829	1034	1736	1733	1760	1738	2786	1053	1742	1678	7	0	0	0	0	0	0	1
Africa	ZAF_397	2843	880	1083	3217	2016	1735	2311	438	2076	1989	2591	1409	2376	1167	1608	2078	1651	1729	2831	1034	1734	1734	1759	1733	2788	1052	1742	1679	7	0	0	0	0	0	0	1
Africa	ZAF_398	2842	881	1087	3213	2016	1736	2304	438	2072	1988	2586	1407	2371	1167	1606	2079	1661	1735	2853	1086	1692	1660	1680	1722	2794	1044	1797	1659	2	0	1	0	0	0	0	0
Africa	ZAF_4	2867	882	1093	3222	2013	1733	2305	436	2073	1985	2580	1404	2379	1166	1597	2075	1610	1802	2796	1021	1699	1754	1623	1766	2846	992	1703	1657	6	0	0	0	0	0	1	0
Africa	ZAF_400	2792	868	1076	3152	1989	1715	2256	433	2046	1960	2551	1381	2330	1154	1584	2047	1626	1708	2772	1023	1711	1701	1728	1708	2739	1035	1713	1647	7	0	0	0	0	0	0	1
Africa	ZAF_403	2840	878	1083	3218	2015	1736	2308	439	2074	1988	2584	1408	2377	1165	1606	2075	1675	1749	2838	1144	1739	2042	1884	1833	2880	1012	1730	1652	2	0	1	0	0	0	0	0
Africa	ZAF_405	2850	885	1090	3220	2024	1739	2306	438	2083	1989	2588	1410	2381	1168	1607	2081	2023	1739	2307	438	2085	1990	2587	1410	2379	1169	1609	2083	7	0	0	0	0	0	0	1
Africa	ZAF_408	2849	885	1092	3220	2024	1739	2305	438	2081	1991	2591	1408	2379	1168	1608	2081	1629	1797	2715	1083	1738	2115	1910	1879	2774	1019	1655	1712	7	0	0	0	0	0	0	1
Africa	ZAF_412	2847	885	1087	3218	2020	1738	2307	439	2077	1990	2589	1410	2376	1168	1608	2080	1620	1741	2863	1063	1843	1905	2098	1711	2793	1180	1822	1609	2	0	1	0	0	0	0	0
Africa	ZAF_419	2849	886	1089	3221	2023	1740	2305	439	2078	1995	2590	1413	2375	1165	1608	2084	0	2	0	0	6	1	0	1	0	1	2	0	1	1	0	0	0	0	0	0
Africa	ZAF_421	2843	881	1087	3218	2018	1736	2307	438	2078	1989	2591	1411	2372	1167	1608	2080	1622	1788	2864	1008	1803	1901	2026	1641	2887	1180	1743	1639	6	0	0	0	0	0	1	0
Africa	ZAF_426	2764	844	1045	3089	1939	1671	2218	420	2004	1909	2491	1356	2282	1131	1543	2001	1542	1648	2795	1073	1644	1642	1699	1682	2691	1013	1769	1537	2	0	1	0	0	0	0	0
Africa	ZAF_429	2846	889	1089	3224	2023	1740	2304	439	2079	1990	2588	1409	2377	1169	1608	2083	1630	1795	2715	1083	1737	2115	1907	1882	2772	1019	1654	1712	7	0	0	0	0	0	0	1
Africa	ZAF_43	2854	878	1089	3207	2007	1727	2295	436	2062	1980	2574	1398	2365	1162	1595	2071	1641	1794	2884	1035	1705	1690	1690	1739	2843	1043	1788	1693	2	0	1	0	0	0	0	0
Africa	ZAF_439	2847	886	1088	3219	2021	1738	2306	440	2078	1992	2589	1412	2375	1167	1608	2082	1694	1718	2855	1045	1839	1900	2075	1673	2838	1147	1794	1633	6	0	0	0	0	0	1	0
Africa	ZAF_442	2875	882	1087	3219	2019	1736	2304	440	2074	1993	2589	1410	2371	1164	1608	2080	1652	1732	2829	1034	1734	1734	1760	1735	2799	1051	1748	1684	7	0	0	0	0	0	0	1
Africa	ZAF_443	2835	881	1084	3213	2013	1733	2293	436	2070	1987	2579	1404	2366	1159	1601	2070	1617	1785	2856	1004	1798	1899	2022	1635	2883	1175	1738	1633	6	0	0	0	0	0	1	0
Africa	ZAF_444	2846	883	1094	3222	2023	1738	2306	437	2083	1990	2590	1408	2381	1167	1608	2078	1600	1737	2903	1177	1679	2010	1887	1850	2844	1020	1771	1623	6	0	0	0	0	0	1	0
Africa	ZAF_445	2841	885	1088	3219	2021	1739	2301	440	2078	1990	2588	1408	2373	1169	1607	2081	1645	1769	2830	1176	1700	2036	1822	1819	2917	1053	1678	1641	2	0	1	0	0	0	0	0
Africa	ZAF_449	2636	809	1011	2933	1889	1599	2131	406	1903	1840	2407	1292	2172	1085	1490	1954	1562	1636	2621	1078	1598	1883	1725	1703	2667	928	1620	1519	3	0	0	1	0	0	0	0
Africa	ZAF_45	2843	881	1090	3215	2018	1736	2305	439	2079	1989	2589	1410	2373	1167	1608	2078	1640	1763	2786	1148	1708	2098	1901	1828	2851	1002	1711	1621	2	0	1	0	0	0	0	0
Africa	ZAF_450	2878	885	1093	3225	2024	1739	2305	436	2081	1994	2590	1410	2380	1163	1607	2080	1655	1803	2855	987	1878	1977	2050	1701	2946	1117	1748	1618	7	0	0	0	0	0	0	1
Africa	ZAF_451	2839	880	1092	3210	2018	1735	2303	437	2081	1988	2590	1407	2374	1168	1606	2075	1679	1751	2837	1146	1738	2041	1888	1835	2880	1012	1729	1653	7	0	0	0	0	0	0	1
Africa	ZAF_452	2847	885	1091	3222	2024	1738	2305	438	2082	1989	2588	1410	2379	1167	1608	2081	1693	1718	2857	1044	1842	1899	2076	1674	2839	1148	1795	1633	6	0	0	0	0	0	1	0
Africa	ZAF_453	2843	880	1088	3214	2018	1736	2303	439	2078	1991	2591	1410	2371	1167	1607	2078	1680	1752	2837	1145	1738	2044	1889	1835	2881	1013	1728	1654	7	0	0	0	0	0	0	1
Africa	ZAF_455	2803	864	1072	3159	1989	1707	2260	436	2051	1952	2549	1385	2329	1159	1581	2047	1612	1737	2741	1130	1682	2052	1874	1795	2804	998	1689	1597	2	0	1	0	0	0	0	0
Africa	ZAF_457	2599	808	1007	2930	1862	1600	2106	403	1900	1821	2375	1272	2178	1075	1480	1907	1553	1609	2591	1057	1597	1860	1734	1678	2643	933	1599	1531	2	0	1	0	0	0	0	0
Africa	ZAF_458	2848	883	1090	3221	2023	1739	2307	438	2081	1989	2589	1412	2376	1168	1608	2084	1657	1803	2850	988	1875	1979	2049	1702	2946	1116	1748	1617	7	0	0	0	0	0	0	1
Africa	ZAF_459	2688	828	1025	3050	1916	1644	2175	423	1969	1889	2462	1330	2240	1116	1523	1966	1587	1666	2687	1079	1645	1927	1792	1739	2726	962	1633	1573	2	0	1	0	0	0	0	0
Africa	ZAF_46	2880	883	1095	3225	2024	1739	2308	437	2083	1991	2591	1408	2383	1167	1609	2079	0	2	1	0	12	2	0	1	1	1	0	0	1	1	0	0	0	0	0	0
Africa	ZAF_467	2847	887	1087	3227	2022	1740	2306	439	2079	1991	2588	1408	2380	1167	1610	2079	1683	1678	2940	1061	1834	1885	2090	1660	2898	1187	1761	1642	2	0	1	0	0	0	0	0
Africa	ZAF_468	2847	885	1094	3224	2020	1741	2306	437	2077	1994	2588	1410	2378	1166	1606	2082	0	3	0	0	8	2	0	0	0	0	0	1	1	1	0	0	0	0	0	0
Africa	ZAF_469	2832	877	1088	3210	2015	1731	2301	437	2072	1985	2588	1403	2366	1167	1603	2077	1647	1731	2822	1031	1734	1730	1757	1735	2781	1049	1737	1672	7	0	0	0	0	0	0	1
Africa	ZAF_47	2849	886	1091	3224	2023	1738	2305	439	2081	1989	2587	1411	2378	1168	1607	2082	2022	1739	2307	440	2083	1990	2585	1411	2377	1169	1609	2082	7	0	0	0	0	0	0	1
Africa	ZAF_470	2844	883	1088	3214	2021	1736	2305	438	2077	1988	2589	1409	2371	1167	1608	2082	1604	1718	2901	1110	1699	1703	1761	1750	2784	1056	1832	1605	7	0	0	0	0	0	0	1
Africa	ZAF_471	2846	882	1087	3219	2019	1738	2308	438	2079	1987	2588	1411	2376	1168	1610	2080	1691	1718	2855	1043	1840	1897	2075	1670	2840	1149	1795	1632	2	0	1	0	0	0	0	0
Africa	ZAF_472	2842	881	1086	3217	2016	1737	2308	439	2077	1989	2590	1412	2372	1168	1608	2080	1682	1752	2838	1144	1737	2043	1888	1834	2883	1013	1729	1655	7	0	0	0	0	0	0	1
Africa	ZAF_475	2849	885	1088	3218	2022	1740	2306	439	2077	1994	2589	1413	2375	1166	1608	2084	0	2	0	0	6	1	0	1	0	1	3	0	1	1	0	0	0	0	0	0
Africa	ZAF_476	2683	842	1036	3049	1929	1641	2180	425	1970	1897	2470	1327	2249	1112	1529	1971	1535	1634	2746	1049	1616	1627	1693	1657	2638	998	1731	1516	3	0	0	1	0	0	0	0
Africa	ZAF_479	2649	831	1042	3052	1915	1628	2170	423	1967	1893	2455	1334	2239	1119	1500	1975	1537	1636	2706	948	1784	1747	1948	1584	2680	1115	1655	1513	2	0	1	0	0	0	0	0
Africa	ZAF_480	2849	887	1089	3215	2022	1737	2307	436	2080	1989	2591	1410	2375	1168	1607	2083	1601	1735	2901	1177	1681	2008	1886	1854	2845	1022	1773	1621	6	0	0	0	0	0	1	0
Africa	ZAF_482	2839	882	1091	3212	2016	1737	2305	437	2074	1989	2590	1406	2372	1168	1607	2079	1598	1712	2906	1043	1857	1835	2043	1678	2866	1183	1776	1570	2	0	1	0	0	0	0	0
Africa	ZAF_489	2700	845	1041	3118	1954	1634	2233	424	1985	1920	2491	1346	2301	1100	1530	1986	1528	1641	2802	1050	1640	1632	1702	1694	2663	1015	1764	1533	2	0	1	0	0	0	0	0
Africa	ZAF_49	2847	886	1088	3217	2022	1739	2305	439	2079	1991	2589	1413	2374	1167	1608	2084	1690	1726	2764	1095	1793	1626	1713	1695	2770	1085	1826	1583	6	0	0	0	0	0	1	0
Africa	ZAF_491	2841	882	1091	3215	2016	1737	2308	438	2074	1989	2589	1411	2371	1165	1609	2081	1637	1763	2789	1150	1707	2095	1900	1827	2852	1003	1713	1619	2	0	1	0	0	0	0	0
Africa	ZAF_493	2841	884	1090	3215	2018	1737	2305	436	2078	1988	2591	1408	2372	1169	1607	2081	1651	1734	2828	1035	1733	1734	1759	1739	2787	1052	1741	1678	7	0	0	0	0	0	0	1
Africa	ZAF_497	2812	871	1079	3186	2003	1715	2287	435	2069	1965	2567	1401	2352	1161	1591	2061	1668	1737	2809	1134	1726	2024	1866	1824	2855	1004	1712	1639	7	0	0	0	0	0	0	1
Africa	ZAF_499	2846	888	1095	3220	2022	1741	2302	437	2081	1993	2588	1411	2378	1168	1605	2083	2023	1741	2306	438	2083	1991	2587	1412	2377	1167	1606	2083	7	0	0	0	0	0	0	1
Africa	ZAF_5	2835	880	1085	3209	2018	1732	2296	438	2078	1982	2582	1406	2366	1167	1603	2076	1584	1811	2872	1144	1746	2002	1847	1828	2942	1101	1702	1620	2	0	1	0	0	0	0	0
Africa	ZAF_50	2806	865	1068	3162	1986	1709	2271	435	2046	1957	2551	1392	2331	1148	1588	2047	1561	1733	2758	1118	1691	2051	1850	1817	2823	992	1657	1572	7	0	0	0	0	0	0	1
Africa	ZAF_502	2813	868	1076	3195	2000	1716	2285	434	2062	1966	2563	1399	2352	1154	1593	2056	1586	1756	2843	1054	1704	1628	1685	1659	2809	1101	1774	1597	2	0	1	0	0	0	0	0
Africa	ZAF_508	2580	793	1006	2973	1847	1567	2125	416	1899	1821	2372	1285	2184	1071	1464	1890	1482	1628	2634	915	1641	1748	1857	1502	2647	1075	1574	1508	2	0	1	0	0	0	0	0
Africa	ZAF_510	2853	880	1087	3212	2009	1727	2295	437	2061	1982	2572	1397	2368	1162	1592	2070	1650	1792	2831	982	1864	1971	2036	1691	2923	1105	1739	1606	7	0	0	0	0	0	0	1
Africa	ZAF_511	2788	860	1070	3129	1980	1686	2258	433	2030	1940	2542	1367	2316	1151	1569	2036	1582	1687	2802	967	1848	1790	2023	1638	2781	1157	1728	1580	3	0	0	1	0	0	0	0
Africa	ZAF_518	2568	796	978	2935	1832	1579	2121	393	1878	1834	2369	1271	2194	1047	1463	1875	1533	1534	2607	933	1713	1710	1881	1528	2607	1024	1606	1427	2	0	1	0	0	0	0	0
Africa	ZAF_519	2786	873	1073	3154	1986	1712	2235	430	2042	1957	2533	1379	2319	1144	1575	2038	1567	1712	2838	1155	1647	1975	1849	1821	2783	1001	1734	1590	6	0	0	0	0	0	1	0
Africa	ZAF_523	2689	834	1027	3044	1915	1640	2185	419	1989	1878	2449	1347	2251	1112	1521	1969	1504	1676	2652	1073	1639	1975	1771	1765	2703	955	1592	1514	2	0	1	0	0	0	0	0
Africa	ZAF_524	2655	812	1010	3022	1894	1616	2175	412	1952	1859	2432	1319	2233	1095	1509	1940	1565	1650	2661	1066	1637	1913	1764	1733	2695	947	1619	1548	3	0	0	1	0	0	0	0
Africa	ZAF_525	2850	884	1092	3222	2022	1741	2309	436	2080	1991	2591	1411	2379	1167	1610	2084	2021	1742	2310	437	2083	1991	2589	1409	2377	1168	1612	2086	7	0	0	0	0	0	0	1
Africa	ZAF_526	2881	886	1089	3223	2021	1739	2307	436	2080	1993	2590	1411	2379	1167	1604	2083	1619	1809	2798	1020	1711	1757	1625	1769	2861	996	1707	1660	4	0	0	0	1	0	0	0
Africa	ZAF_528	2841	881	1088	3211	2017	1736	2303	438	2079	1989	2590	1409	2371	1168	1607	2078	1604	1775	2863	1066	1719	1640	1699	1673	2838	1112	1787	1612	7	0	0	0	0	0	0	1
Africa	ZAF_53	2840	883	1092	3219	2022	1735	2304	437	2077	1988	2592	1405	2372	1169	1607	2081	1606	1718	2902	1110	1700	1704	1764	1748	2784	1055	1830	1604	7	0	0	0	0	0	0	1
Africa	ZAF_530	2850	886	1089	3226	2021	1741	2309	439	2077	1992	2589	1408	2381	1167	1610	2080	0	1	0	0	10	1	0	0	0	1	3	0	1	1	0	0	0	0	0	0
Africa	ZAF_531	2844	884	1087	3219	2019	1739	2305	438	2078	1989	2590	1408	2374	1169	1608	2080	1586	1816	2880	1148	1752	2007	1853	1831	2945	1103	1709	1625	3	0	0	1	0	0	0	0
Africa	ZAF_532	2817	876	1089	3193	2000	1724	2277	435	2063	1971	2566	1396	2348	1159	1596	2056	1674	1733	2812	1139	1724	2028	1881	1816	2851	1000	1715	1637	7	0	0	0	0	0	0	1
Africa	ZAF_536	2814	876	1078	3188	2004	1728	2274	433	2056	1976	2564	1388	2355	1158	1592	2059	1621	1702	2825	1191	1641	2055	1854	1820	2841	1025	1656	1649	2	0	1	0	0	0	0	0
Africa	ZAF_54	2813	872	1088	3182	1999	1724	2286	434	2056	1971	2572	1392	2348	1163	1596	2064	1606	1780	2832	1000	1794	1887	2011	1624	2855	1170	1728	1627	6	0	0	0	0	0	1	0
Africa	ZAF_546	2883	885	1089	3223	2022	1741	2308	438	2079	1990	2589	1412	2376	1167	1611	2084	0	1	0	0	7	2	0	2	0	1	3	1	1	1	0	0	0	0	0	0
Africa	ZAF_549	2722	857	1054	3079	1949	1671	2195	425	1993	1913	2491	1341	2268	1128	1545	2000	1584	1696	2669	1115	1642	2015	1838	1744	2733	979	1647	1552	3	0	0	1	0	0	0	0
Africa	ZAF_552	2870	881	1091	3228	2017	1742	2304	436	2074	1990	2588	1405	2375	1168	1607	2080	1679	1752	2841	1147	1738	2044	1889	1835	2894	1011	1735	1660	7	0	0	0	0	0	0	1
Africa	ZAF_553	2846	886	1094	3218	2023	1738	2307	437	2081	1990	2590	1412	2376	1167	1607	2084	1658	1804	2850	986	1876	1976	2051	1701	2945	1118	1747	1618	7	0	0	0	0	0	0	1
Africa	ZAF_558	2853	879	1095	3227	2024	1738	2308	437	2082	1990	2591	1410	2380	1167	1609	2082	2023	1739	2310	438	2088	1990	2590	1408	2376	1168	1611	2085	7	0	0	0	0	0	0	1
Africa	ZAF_562	2855	885	1091	3227	2024	1741	2306	439	2076	1993	2588	1409	2378	1166	1609	2084	1656	1803	2853	987	1878	1978	2051	1703	2947	1116	1751	1618	7	0	0	0	0	0	0	1
Africa	ZAF_568	2784	864	1068	3170	1982	1700	2274	433	2053	1948	2544	1394	2337	1153	1575	2043	1621	1725	2736	1131	1687	2066	1870	1798	2808	986	1679	1586	2	0	1	0	0	0	0	0
Africa	ZAF_57	2849	885	1090	3221	2022	1739	2308	439	2079	1991	2589	1413	2376	1167	1609	2084	1656	1802	2853	988	1874	1977	2050	1702	2946	1117	1750	1617	7	0	0	0	0	0	0	1
Africa	ZAF_571	2844	884	1093	3217	2019	1738	2308	437	2079	1989	2590	1412	2375	1168	1607	2083	1612	1813	2910	1159	1622	2062	1824	1791	2969	1027	1707	1655	3	0	0	1	0	0	0	0
Africa	ZAF_572	2840	882	1091	3215	2017	1739	2305	438	2079	1989	2589	1410	2374	1168	1608	2078	1683	1752	2836	1146	1740	2043	1890	1837	2882	1012	1729	1653	7	0	0	0	0	0	0	1
Africa	ZAF_574	2872	880	1091	3218	2020	1736	2304	436	2082	1991	2591	1409	2377	1165	1607	2076	1679	1753	2840	1145	1741	2042	1887	1837	2894	1013	1735	1660	7	0	0	0	0	0	0	1
Africa	ZAF_577	2591	813	1000	2899	1845	1592	2091	398	1890	1832	2369	1286	2155	1067	1467	1903	1448	1648	2638	1043	1583	1846	1724	1664	2669	1010	1549	1499	3	0	0	1	0	0	0	0
Africa	ZAF_578	2847	883	1094	3224	2023	1738	2306	437	2083	1991	2590	1408	2383	1167	1606	2078	1630	1795	2715	1083	1740	2116	1911	1876	2772	1019	1654	1712	6	0	0	0	0	0	1	0
Africa	ZAF_580	2603	819	1007	3017	1873	1596	2150	414	1934	1859	2400	1319	2221	1078	1477	1920	1546	1619	2652	1058	1630	1880	1747	1710	2674	949	1608	1518	3	0	0	1	0	0	0	0
Africa	ZAF_583	2846	886	1093	3224	2021	1741	2305	437	2079	1991	2588	1411	2377	1168	1607	2084	2022	1741	2307	438	2083	1991	2587	1410	2377	1167	1608	2083	7	0	0	0	0	0	0	1
Africa	ZAF_585	2804	875	1075	3181	2000	1721	2265	434	2051	1972	2554	1388	2347	1152	1584	2055	1999	1721	2268	434	2053	1971	2553	1386	2347	1154	1585	2055	7	0	0	0	0	0	0	1
Africa	ZAF_586	2841	881	1092	3212	2017	1739	2304	436	2077	1988	2589	1407	2372	1168	1609	2079	1691	1685	2833	1035	1889	1881	2054	1687	2853	1123	1766	1588	2	0	1	0	0	0	0	0
Africa	ZAF_59	2840	881	1092	3216	2017	1737	2306	437	2078	1990	2590	1407	2376	1167	1607	2076	1679	1753	2839	1146	1739	2043	1888	1835	2882	1012	1729	1653	7	0	0	0	0	0	0	1
Africa	ZAF_590	2833	875	1084	3206	2013	1729	2291	437	2063	1979	2573	1400	2360	1161	1599	2075	1612	1827	2762	1173	1716	2035	1776	1852	2871	1028	1719	1612	3	0	0	1	0	0	0	0
Africa	ZAF_594	2843	879	1089	3217	2020	1736	2303	437	2082	1989	2592	1408	2374	1168	1608	2078	1651	1732	2829	1035	1735	1734	1761	1738	2786	1051	1742	1678	6	0	0	0	0	0	1	0
Africa	ZAF_595	2847	886	1090	3223	2021	1738	2306	439	2077	1990	2587	1412	2374	1166	1607	2084	1638	1721	2886	1235	1675	2067	1839	1827	2954	1020	1712	1578	2	0	1	0	0	0	0	0
Africa	ZAF_599	2670	829	1023	3054	1895	1621	2176	407	1962	1879	2431	1333	2251	1096	1488	1952	1514	1603	2726	926	1769	1730	1954	1583	2671	1115	1660	1515	3	0	0	1	0	0	0	0
Africa	ZAF_6	2846	886	1090	3219	2022	1739	2305	441	2079	1990	2587	1413	2375	1168	1608	2083	1565	1732	2826	1071	1719	1702	1681	1751	2810	1082	1701	1608	6	0	0	0	0	0	1	0
Africa	ZAF_601	2631	822	1012	2966	1875	1613	2130	403	1926	1856	2418	1295	2199	1087	1492	1932	1529	1638	2633	1077	1605	1908	1753	1655	2725	973	1584	1483	2	0	1	0	0	0	0	0
Africa	ZAF_602	2853	871	1085	3186	2003	1723	2286	437	2061	1971	2572	1396	2349	1162	1600	2064	1637	1726	2801	1032	1720	1719	1741	1725	2776	1042	1736	1672	6	0	0	0	0	0	1	0
Africa	ZAF_603	2879	887	1095	3220	2024	1739	2306	439	2080	1992	2591	1410	2377	1167	1610	2082	1659	1805	2852	988	1876	1976	2052	1701	2947	1118	1750	1618	7	0	0	0	0	0	0	1
Africa	ZAF_604	2820	882	1081	3199	2007	1730	2282	434	2067	1983	2570	1400	2361	1156	1594	2062	1597	1706	2881	1102	1693	1692	1752	1742	2760	1045	1819	1593	6	0	0	0	0	0	1	0
Africa	ZAF_607	2678	833	1032	3063	1928	1631	2182	421	1989	1895	2461	1351	2252	1111	1509	1979	1554	1680	2645	1080	1644	1979	1797	1750	2706	954	1634	1527	2	0	1	0	0	0	0	0
Africa	ZAF_608	2783	855	1065	3136	1972	1696	2250	427	2032	1935	2527	1373	2318	1138	1574	2025	1651	1672	2779	1021	1759	1855	1980	1633	2776	1083	1724	1605	3	0	0	1	0	0	0	0
Africa	ZAF_61	2750	864	1057	3137	1960	1685	2235	431	2024	1940	2531	1368	2303	1148	1558	2021	1542	1758	2809	1124	1710	1953	1813	1783	2860	1072	1657	1581	2	0	1	0	0	0	0	0
Africa	ZAF_613	2823	877	1077	3202	2003	1724	2296	436	2066	1972	2568	1402	2363	1158	1597	2062	1600	1716	2875	1027	1835	1831	2018	1670	2845	1148	1792	1555	3	0	0	1	0	0	0	0
Africa	ZAF_615	2851	884	1088	3228	2020	1742	2311	437	2077	1993	2591	1409	2381	1167	1610	2082	0	1	0	0	13	2	0	0	0	1	3	0	1	1	0	0	0	0	0	0
Africa	ZAF_620	2846	886	1094	3226	2022	1740	2306	436	2078	1992	2590	1407	2379	1166	1607	2081	1653	1805	2854	988	1875	1978	2050	1700	2946	1117	1747	1617	7	0	0	0	0	0	0	1
Africa	ZAF_621	2846	884	1090	3215	2021	1738	2304	439	2078	1991	2590	1413	2371	1168	1608	2084	1600	1751	2974	1076	1835	1866	2015	1765	2889	1155	1821	1612	3	0	0	1	0	0	0	0
Africa	ZAF_622	2846	883	1089	3221	2019	1737	2309	439	2077	1989	2588	1411	2376	1165	1610	2079	1620	1728	2881	982	1884	1832	2066	1668	2849	1186	1761	1619	3	0	0	1	0	0	0	0
Africa	ZAF_623	2817	875	1082	3182	2006	1728	2273	434	2065	1978	2567	1394	2355	1158	1593	2059	1614	1774	2837	1004	1784	1885	2014	1625	2867	1170	1727	1625	7	0	0	0	0	0	0	1
Africa	ZAF_632	2874	881	1091	3216	2019	1736	2304	437	2081	1989	2592	1409	2373	1167	1608	2077	1637	1763	2790	1149	1707	2097	1901	1830	2863	1002	1718	1625	7	0	0	0	0	0	0	1
Africa	ZAF_634	2800	878	1090	3203	2005	1717	2294	438	2067	1979	2577	1401	2363	1164	1587	2065	1671	1733	2820	1142	1733	2027	1882	1827	2859	1008	1714	1641	7	0	0	0	0	0	0	1
Africa	ZAF_635	2844	884	1087	3218	2021	1737	2305	439	2077	1989	2589	1408	2374	1167	1608	2079	1606	1718	2901	1110	1698	1705	1762	1747	2785	1056	1831	1606	6	0	0	0	0	0	1	0
Africa	ZAF_64	2845	883	1088	3218	2020	1738	2305	439	2078	1989	2588	1409	2375	1166	1610	2079	1641	1763	2787	1147	1709	2095	1901	1828	2852	1003	1716	1622	2	0	1	0	0	0	0	0
Africa	ZAF_641	2738	848	1049	3085	1952	1663	2217	427	1995	1913	2489	1358	2276	1119	1546	2006	1555	1651	2794	1070	1630	1632	1699	1676	2675	1016	1770	1549	6	0	0	0	0	0	1	0
Africa	ZAF_642	2642	822	1011	3010	1883	1619	2136	412	1934	1872	2434	1315	2194	1095	1495	1951	1462	1636	2742	965	1739	1716	1920	1616	2654	1121	1665	1504	3	0	0	1	0	0	0	0
Africa	ZAF_645	2844	883	1088	3213	2020	1737	2304	440	2076	1988	2588	1410	2370	1169	1608	2083	1645	1769	2826	1176	1699	2036	1821	1818	2918	1052	1678	1641	3	0	0	1	0	0	0	0
Africa	ZAF_646	2818	876	1073	3172	1996	1714	2266	433	2056	1963	2547	1394	2345	1149	1581	2051	1602	1769	2675	1072	1707	2096	1875	1863	2728	1003	1623	1696	2	0	1	0	0	0	0	0
Africa	ZAF_648	2835	875	1084	3216	2009	1733	2302	439	2069	1987	2580	1410	2367	1160	1604	2074	1677	1747	2834	1141	1733	2040	1883	1828	2876	1008	1727	1651	3	0	0	1	0	0	0	0
Africa	ZAF_649	2849	885	1089	3222	2022	1741	2305	439	2080	1992	2590	1413	2375	1168	1610	2084	2022	1741	2308	439	2083	1991	2588	1411	2376	1169	1611	2083	7	0	0	0	0	0	0	1
Africa	ZAF_651	2842	881	1087	3220	2020	1738	2303	438	2079	1989	2590	1407	2374	1168	1608	2078	1681	1751	2839	1145	1739	2043	1889	1836	2883	1013	1729	1654	7	0	0	0	0	0	0	1
Africa	ZAF_656	2769	838	1038	3083	1931	1658	2210	420	1994	1898	2484	1351	2264	1128	1535	1996	1587	1690	2722	1089	1665	1949	1793	1770	2768	977	1660	1589	3	0	0	1	0	0	0	0
Africa	ZAF_657	2844	884	1087	3215	2022	1737	2303	439	2077	1989	2589	1408	2372	1168	1608	2081	1604	1719	2901	1109	1700	1702	1762	1750	2785	1057	1832	1604	6	0	0	0	0	0	1	0
Africa	ZAF_659	2752	864	1057	3139	1960	1685	2237	431	2023	1940	2530	1368	2303	1148	1558	2022	1582	1725	2761	1081	1722	1664	1638	1690	2804	1083	1685	1570	3	0	0	1	0	0	0	0
Africa	ZAF_66	2844	881	1086	3218	2020	1733	2306	439	2076	1991	2587	1413	2373	1162	1607	2080	1604	1718	2901	1108	1699	1707	1761	1748	2783	1054	1833	1604	7	0	0	0	0	0	0	1
Africa	ZAF_660	2775	862	1068	3157	1978	1694	2254	432	2031	1940	2533	1376	2316	1147	1571	2038	1649	1713	2778	1120	1702	1998	1845	1801	2814	986	1695	1616	7	0	0	0	0	0	0	1
Africa	ZAF_661	2848	884	1088	3223	2020	1740	2309	439	2078	1990	2587	1413	2378	1166	1610	2081	1629	1795	2717	1082	1739	2115	1907	1879	2774	1018	1656	1712	6	0	0	0	0	0	1	0
Africa	ZAF_662	2810	863	1073	3159	1975	1709	2268	431	2045	1957	2542	1392	2337	1147	1578	2038	1576	1688	2854	1021	1835	1807	1999	1652	2832	1161	1738	1547	7	0	0	0	0	0	0	1
Africa	ZAF_664	2846	886	1093	3217	2020	1740	2307	438	2077	1989	2589	1412	2373	1167	1611	2084	1600	1750	2974	1076	1835	1866	2019	1763	2890	1156	1821	1612	3	0	0	1	0	0	0	0
Africa	ZAF_666	2840	880	1085	3216	2010	1734	2307	435	2073	1986	2586	1405	2375	1166	1603	2073	1584	1761	2797	1137	1714	2085	1869	1835	2869	1008	1679	1594	7	0	0	0	0	0	0	1
Africa	ZAF_667	2601	820	998	2960	1866	1596	2109	407	1926	1850	2415	1288	2178	1085	1484	1909	1487	1588	2648	964	1706	1715	1894	1550	2627	1070	1661	1428	3	0	0	1	0	0	0	0
Africa	ZAF_669	2842	882	1087	3221	2019	1737	2303	438	2075	1993	2590	1408	2372	1164	1608	2078	1679	1752	2840	1145	1738	2043	1887	1834	2882	1013	1729	1654	7	0	0	0	0	0	0	1
Africa	ZAF_673	2622	798	1004	2967	1876	1606	2129	413	1927	1848	2409	1293	2201	1104	1477	1934	1479	1605	2678	1022	1580	1584	1653	1624	2577	986	1700	1484	3	0	0	1	0	0	0	0
Africa	ZAF_675	2854	874	1078	3209	2011	1719	2297	432	2059	1984	2580	1390	2371	1148	1598	2059	1623	1758	2814	1164	1694	2028	1811	1805	2916	1043	1673	1629	3	0	0	1	0	0	0	0
Africa	ZAF_682	2847	885	1090	3217	2022	1738	2307	439	2080	1990	2589	1413	2376	1167	1608	2083	1693	1719	2856	1044	1840	1899	2076	1674	2839	1148	1794	1633	2	0	1	0	0	0	0	0
Africa	ZAF_683	2878	886	1094	3219	2023	1739	2305	437	2082	1992	2591	1409	2379	1167	1607	2081	1657	1804	2852	988	1876	1976	2051	1701	2946	1118	1748	1618	7	0	0	0	0	0	0	1
Africa	ZAF_688	2620	807	999	2930	1862	1576	2094	413	1895	1844	2399	1277	2154	1081	1464	1910	1483	1637	2614	935	1665	1736	1872	1512	2634	1087	1615	1499	2	0	1	0	0	0	0	0
Africa	ZAF_69	2849	886	1091	3221	2023	1741	2305	438	2080	1991	2589	1412	2376	1167	1609	2084	2022	1741	2307	438	2083	1991	2588	1411	2377	1168	1610	2083	7	0	0	0	0	0	0	1
Africa	ZAF_691	2862	886	1095	3221	2024	1740	2307	437	2081	1993	2592	1409	2380	1166	1610	2081	0	2	0	0	8	0	0	0	0	1	0	0	1	1	0	0	0	0	0	0
Africa	ZAF_693	2832	881	1086	3211	2016	1728	2299	438	2076	1983	2584	1407	2366	1165	1603	2074	1609	1802	2788	1021	1702	1752	1621	1766	2847	995	1700	1652	7	0	0	0	0	0	0	1
Africa	ZAF_694	2834	878	1083	3206	2012	1732	2301	437	2075	1983	2582	1408	2367	1164	1604	2073	1618	1782	2854	1007	1798	1895	2018	1636	2878	1179	1737	1634	2	0	1	0	0	0	0	0
Africa	ZAF_698	2663	828	1016	3039	1902	1635	2160	413	1940	1886	2445	1318	2224	1098	1508	1965	1482	1694	2731	1083	1654	1895	1758	1725	2774	1026	1605	1514	3	0	0	1	0	0	0	0
Africa	ZAF_7	2850	886	1094	3219	2022	1741	2309	437	2081	1991	2591	1412	2378	1167	1611	2083	0	1	0	0	5	1	0	0	0	0	0	0	1	1	0	0	0	0	0	0
Africa	ZAF_70	2852	875	1081	3195	2008	1719	2290	435	2072	1968	2568	1404	2359	1161	1592	2066	1615	1775	2695	1075	1727	2097	1891	1873	2749	1009	1639	1699	7	0	0	0	0	0	0	1
Africa	ZAF_700	2847	886	1095	3221	2022	1740	2306	438	2079	1993	2590	1411	2377	1166	1608	2082	0	2	0	0	6	0	0	0	0	0	0	0	1	1	0	0	0	0	0	0
Africa	ZAF_701	2847	887	1095	3221	2021	1743	2303	438	2079	1993	2587	1411	2378	1168	1606	2083	2022	1742	2306	439	2082	1991	2587	1411	2377	1167	1607	2083	7	0	0	0	0	0	0	1
Africa	ZAF_705	2837	880	1083	3211	2012	1734	2300	438	2078	1984	2586	1407	2370	1168	1605	2072	1584	1763	2798	1135	1715	2083	1872	1838	2865	1014	1679	1592	3	0	0	1	0	0	0	0
Africa	ZAF_706	2843	881	1088	3218	2019	1737	2304	438	2080	1988	2588	1410	2374	1168	1607	2079	1623	1787	2863	1009	1802	1903	2027	1642	2887	1179	1743	1639	7	0	0	0	0	0	0	1
Africa	ZAF_708	2818	876	1081	3201	2006	1726	2288	436	2060	1979	2574	1394	2358	1163	1594	2068	1573	1756	2782	1131	1704	2073	1865	1826	2848	1010	1668	1582	7	0	0	0	0	0	0	1
Africa	ZAF_71	2847	885	1090	3214	2022	1736	2304	439	2078	1990	2588	1410	2373	1167	1607	2082	1681	1681	2935	1059	1832	1881	2089	1660	2894	1190	1760	1641	2	0	1	0	0	0	0	0
Africa	ZAF_710	2849	886	1090	3221	2023	1736	2306	436	2083	1988	2590	1411	2376	1168	1607	2083	1624	1729	2856	1095	1676	1784	1714	1805	2788	1013	1747	1673	3	0	0	1	0	0	0	0
Africa	ZAF_713	2792	854	1067	3130	1971	1685	2244	433	2031	1932	2534	1374	2299	1153	1565	2033	1585	1684	2803	960	1826	1788	2024	1626	2763	1156	1725	1578	2	0	1	0	0	0	0	0
Africa	ZAF_714	2848	881	1088	3218	2019	1739	2308	439	2076	1991	2590	1412	2373	1165	1612	2082	1643	1769	2830	1176	1701	2037	1823	1815	2921	1051	1681	1643	3	0	0	1	0	0	0	0
Africa	ZAF_721	2697	821	1004	3035	1914	1623	2176	415	1966	1873	2436	1336	2242	1101	1501	1969	1579	1640	2685	1068	1653	1909	1774	1745	2723	960	1634	1572	3	0	0	1	0	0	0	0
Africa	ZAF_722	2843	882	1087	3215	2019	1738	2303	439	2077	1990	2589	1407	2374	1168	1608	2077	1623	1789	2860	1009	1802	1902	2026	1640	2887	1179	1743	1639	7	0	0	0	0	0	0	1
Africa	ZAF_727	2849	885	1091	3216	2023	1737	2305	439	2079	1991	2590	1410	2374	1167	1608	2082	1655	1801	2850	988	1874	1976	2051	1703	2942	1116	1749	1616	7	0	0	0	0	0	0	1
Africa	ZAF_733	2580	804	983	2939	1836	1562	2100	396	1905	1812	2367	1290	2159	1067	1448	1889	1506	1568	2587	933	1586	1594	1607	1589	2538	961	1565	1517	2	0	1	0	0	0	0	0
Africa	ZAF_738	2841	881	1087	3215	2016	1738	2304	438	2073	1991	2589	1406	2373	1166	1607	2078	1597	1710	2908	1042	1857	1837	2044	1678	2866	1181	1777	1571	6	0	0	0	0	0	1	0
Africa	ZAF_740	2838	882	1086	3211	2015	1734	2299	437	2073	1988	2589	1407	2363	1165	1607	2077	1581	1815	2874	1146	1748	2005	1849	1829	2937	1101	1703	1624	3	0	0	1	0	0	0	0
Africa	ZAF_741	2623	808	987	2926	1864	1602	2102	407	1903	1829	2374	1282	2178	1077	1478	1913	1486	1585	2631	905	1716	1685	1899	1538	2608	1088	1616	1483	2	0	1	0	0	0	0	0
Africa	ZAF_747	2840	879	1088	3214	2019	1735	2303	438	2075	1990	2589	1407	2371	1167	1605	2081	1597	1711	2907	1041	1857	1838	2041	1680	2867	1181	1775	1570	6	0	0	0	0	0	1	0
Africa	ZAF_75	2881	885	1089	3222	2024	1738	2305	438	2078	1994	2590	1411	2377	1166	1607	2084	1630	1795	2716	1082	1738	2116	1909	1879	2773	1019	1655	1713	7	0	0	0	0	0	0	1
Africa	ZAF_751	2879	886	1094	3223	2025	1740	2304	439	2079	1990	2587	1409	2377	1167	1608	2083	1657	1804	2851	988	1874	1978	2051	1702	2946	1117	1748	1619	7	0	0	0	0	0	0	1
Africa	ZAF_753	2646	829	1020	3000	1895	1645	2136	421	1954	1877	2416	1316	2228	1103	1506	1939	1557	1630	2660	965	1617	1625	1661	1625	2604	985	1621	1581	2	0	1	0	0	0	0	0
Africa	ZAF_754	2838	878	1087	3208	2015	1732	2303	440	2073	1986	2584	1410	2368	1162	1607	2074	1681	1749	2833	1141	1734	2040	1885	1828	2879	1009	1728	1651	7	0	0	0	0	0	0	1
Africa	ZAF_755	2839	882	1086	3219	2017	1736	2302	438	2075	1985	2581	1408	2373	1164	1605	2077	1653	1801	2839	983	1877	1976	2042	1697	2942	1115	1742	1612	7	0	0	0	0	0	0	1
Africa	ZAF_76	2848	886	1089	3222	2024	1740	2306	438	2080	1991	2591	1409	2377	1168	1611	2083	1683	1680	2940	1062	1833	1885	2091	1662	2899	1188	1763	1642	6	0	0	0	0	0	1	0
Africa	ZAF_761	2781	850	1054	3107	1951	1668	2221	423	2013	1915	2507	1364	2277	1129	1556	2004	1568	1725	2766	971	1744	1836	1961	1590	2784	1139	1690	1595	2	0	1	0	0	0	0	0
Africa	ZAF_764	2783	864	1075	3148	1982	1704	2247	431	2039	1954	2543	1370	2326	1151	1574	2033	1659	1728	2818	1114	1683	1906	1805	1746	2833	1005	1732	1625	7	0	0	0	0	0	0	1
Africa	ZAF_767	2851	886	1089	3218	2020	1740	2308	439	2079	1991	2588	1414	2376	1167	1608	2083	1619	1808	2796	1023	1709	1755	1625	1770	2861	998	1706	1659	7	0	0	0	0	0	0	1
Africa	ZAF_769	2699	833	1025	3050	1909	1635	2193	424	1960	1881	2442	1342	2252	1106	1515	1970	1564	1628	2716	1158	1568	1942	1726	1727	2769	1003	1588	1565	2	0	1	0	0	0	0	0
Africa	ZAF_77	2709	833	1032	3104	1931	1651	2216	424	2002	1899	2484	1350	2281	1121	1537	1979	1607	1630	2739	992	1752	1819	1990	1612	2714	1089	1712	1558	2	0	1	0	0	0	0	0
Africa	ZAF_770	2847	883	1089	3217	2022	1739	2304	439	2078	1990	2589	1410	2373	1168	1608	2083	1616	1784	2790	1085	1780	1705	1663	1794	2812	1054	1773	1605	3	0	0	1	0	0	0	0
Africa	ZAF_771	2848	886	1087	3222	2022	1738	2306	438	2079	1993	2588	1414	2376	1166	1605	2084	1657	1802	2852	985	1875	1977	2047	1702	2944	1117	1748	1617	7	0	0	0	0	0	0	1
Africa	ZAF_773	2841	881	1089	3217	2018	1737	2305	439	2076	1990	2589	1410	2372	1167	1608	2079	1681	1752	2838	1145	1737	2044	1889	1835	2881	1012	1729	1654	7	0	0	0	0	0	0	1
Africa	ZAF_778	2823	872	1079	3200	2004	1725	2289	436	2062	1975	2574	1395	2357	1161	1599	2062	1663	1742	2821	1140	1724	2028	1871	1823	2856	1008	1717	1644	7	0	0	0	0	0	0	1
Africa	ZAF_779	2842	881	1087	3210	2016	1735	2305	438	2075	1989	2588	1410	2372	1166	1605	2079	1622	1760	2853	1080	1692	1692	1694	1740	2791	1055	1789	1653	3	0	0	1	0	0	0	0
Africa	ZAF_780	2771	864	1062	3151	1984	1692	2258	434	2033	1946	2534	1381	2321	1146	1567	2045	1574	1742	2737	1062	1744	1664	1625	1768	2740	1030	1734	1571	3	0	0	1	0	0	0	0
Africa	ZAF_782	2846	882	1087	3216	2017	1738	2307	439	2076	1991	2590	1411	2373	1167	1608	2081	1586	1773	2936	1079	1811	1865	1989	1718	2896	1172	1805	1593	6	0	0	0	0	0	1	0
Africa	ZAF_786	2844	883	1086	3217	2018	1738	2305	437	2076	1988	2588	1406	2375	1168	1608	2079	1625	1785	2846	1073	1723	1650	1646	1706	2854	1107	1749	1650	2	0	1	0	0	0	0	0
Africa	ZAF_789	2800	871	1066	3178	1985	1710	2274	434	2052	1959	2548	1394	2341	1152	1582	2046	1654	1726	2801	1127	1715	2011	1851	1811	2839	1001	1707	1626	3	0	0	1	0	0	0	0
Africa	ZAF_79	2841	886	1093	3216	2019	1738	2306	438	2079	1989	2589	1409	2377	1169	1608	2080	1692	1718	2854	1046	1839	1897	2076	1673	2837	1148	1791	1633	6	0	0	0	0	0	1	0
Africa	ZAF_791	2846	885	1094	3222	2020	1740	2304	439	2075	1992	2587	1405	2380	1167	1606	2078	0	3	0	0	8	1	0	0	0	0	0	0	7	0	0	0	0	0	0	1
Africa	ZAF_795	2685	828	1032	3043	1910	1643	2161	418	1951	1892	2466	1319	2217	1117	1520	1977	1484	1680	2768	970	1757	1741	1939	1620	2697	1137	1690	1526	3	0	0	1	0	0	0	0
Africa	ZAF_797	2852	887	1094	3219	2022	1743	2304	438	2079	1992	2588	1411	2377	1168	1609	2084	1563	1733	2827	1073	1718	1702	1683	1751	2812	1083	1704	1609	7	0	0	0	0	0	0	1
Africa	ZAF_798	2793	870	1073	3151	1978	1711	2267	430	2029	1960	2547	1374	2335	1149	1581	2043	1630	1765	2782	1129	1609	2070	1821	1779	2855	962	1669	1659	2	0	1	0	0	0	0	0
Africa	ZAF_80	2842	881	1087	3219	2019	1737	2304	438	2079	1990	2590	1408	2375	1167	1608	2077	1681	1751	2839	1145	1738	2043	1888	1834	2883	1013	1729	1654	7	0	0	0	0	0	0	1
Africa	ZAF_801	2865	876	1085	3201	2013	1728	2292	435	2071	1974	2573	1403	2358	1166	1597	2078	1645	1791	2836	983	1859	1971	2038	1696	2924	1111	1740	1612	7	0	0	0	0	0	0	1
Africa	ZAF_803	2843	881	1089	3217	2020	1736	2304	440	2080	1987	2588	1410	2373	1168	1608	2078	1685	1752	2834	1144	1739	2044	1890	1834	2883	1013	1729	1654	7	0	0	0	0	0	0	1
Africa	ZAF_805	2847	885	1087	3219	2022	1739	2304	439	2080	1991	2588	1413	2374	1166	1608	2083	1670	1737	2855	1059	1735	1722	1679	1768	2857	1005	1753	1651	3	0	0	1	0	0	0	0
Africa	ZAF_810	2708	840	1015	2991	1897	1637	2153	416	1952	1866	2424	1325	2219	1093	1519	1946	1552	1620	2648	984	1619	1626	1641	1637	2629	991	1630	1594	3	0	0	1	0	0	0	0
Africa	ZAF_815	2681	828	1029	3021	1921	1635	2208	424	1965	1875	2452	1338	2258	1114	1525	1978	1544	1619	2730	942	1779	1736	1953	1587	2689	1113	1677	1527	2	0	1	0	0	0	0	0
Africa	ZAF_817	2844	883	1087	3219	2020	1738	2305	438	2076	1992	2589	1411	2373	1164	1608	2082	1615	1733	2888	1039	1848	1846	2027	1683	2860	1152	1805	1568	7	0	0	0	0	0	0	1
Africa	ZAF_82	2873	881	1091	3221	2019	1737	2304	438	2077	1991	2590	1407	2375	1167	1607	2079	1650	1734	2829	1036	1735	1735	1760	1738	2799	1051	1747	1683	7	0	0	0	0	0	0	1
Africa	ZAF_820	2848	884	1087	3215	2023	1736	2305	439	2076	1990	2589	1407	2375	1167	1608	2081	1652	1724	2865	1223	1647	2063	1826	1828	2915	1044	1670	1658	2	0	1	0	0	0	0	0
Africa	ZAF_826	2621	816	1006	2956	1848	1611	2107	412	1908	1819	2377	1294	2164	1090	1489	1913	1484	1604	2641	958	1699	1690	1869	1544	2605	1066	1674	1443	3	0	0	1	0	0	0	0
Africa	ZAF_828	2600	814	1004	2896	1841	1598	2111	412	1883	1801	2366	1276	2155	1092	1479	1913	1510	1626	2517	1065	1559	1908	1736	1656	2601	934	1587	1480	2	0	1	0	0	0	0	0
Africa	ZAF_829	2880	888	1093	3215	2023	1742	2308	439	2081	1990	2589	1413	2377	1168	1612	2084	0	0	0	0	0	0	0	0	0	0	0	0	1	1	0	0	0	0	0	0
Africa	ZAF_830	2846	884	1089	3215	2021	1736	2306	439	2078	1990	2589	1412	2373	1166	1608	2082	1648	1692	2877	1074	1915	1834	2055	1725	2839	1148	1842	1535	2	0	1	0	0	0	0	0
Africa	ZAF_833	2843	883	1089	3220	2021	1736	2303	438	2079	1990	2591	1407	2374	1167	1608	2079	1614	1733	2889	1041	1847	1846	2028	1683	2859	1152	1805	1566	7	0	0	0	0	0	0	1
Africa	ZAF_84	2849	885	1089	3219	2021	1740	2306	440	2080	1992	2588	1415	2376	1167	1608	2083	1629	1795	2717	1082	1738	2115	1910	1881	2774	1019	1655	1712	7	0	0	0	0	0	0	1
Africa	ZAF_843	2844	882	1087	3217	2022	1735	2304	440	2076	1993	2589	1412	2371	1164	1607	2082	1602	1719	2903	1109	1700	1704	1762	1749	2785	1057	1832	1603	6	0	0	0	0	0	1	0
Africa	ZAF_844	2842	883	1089	3216	2019	1739	2304	439	2078	1990	2589	1410	2373	1168	1608	2080	1621	1728	2879	983	1883	1831	2069	1670	2845	1186	1762	1615	3	0	0	1	0	0	0	0
Africa	ZAF_849	2840	882	1091	3220	2017	1739	2303	439	2076	1993	2587	1408	2376	1166	1606	2076	1683	1754	2836	1145	1739	2045	1888	1834	2881	1010	1729	1654	7	0	0	0	0	0	0	1
Africa	ZAF_853	2820	876	1080	3196	2006	1719	2289	435	2069	1967	2568	1401	2355	1163	1592	2066	1643	1785	2830	982	1861	1957	2029	1692	2919	1110	1734	1604	7	0	0	0	0	0	0	1
Africa	ZAF_854	2857	876	1082	3199	2003	1731	2295	434	2068	1977	2574	1404	2362	1160	1602	2066	1631	1761	2815	1169	1691	2026	1812	1809	2919	1043	1678	1633	3	0	0	1	0	0	0	0
Africa	ZAF_857	2844	882	1092	3216	2021	1735	2305	438	2079	1988	2590	1409	2372	1168	1607	2081	1562	1761	2947	1024	1853	1833	2035	1728	2861	1193	1794	1610	3	0	0	1	0	0	0	0
Africa	ZAF_86	2843	882	1087	3216	2020	1738	2304	439	2078	1991	2589	1412	2372	1166	1608	2081	1620	1728	2880	983	1881	1831	2067	1669	2846	1186	1762	1615	2	0	1	0	0	0	0	0
Africa	ZAF_860	2827	877	1082	3194	2012	1722	2293	437	2073	1968	2572	1403	2359	1163	1600	2068	1621	1781	2696	1076	1730	2097	1892	1873	2752	1010	1644	1702	6	0	0	0	0	0	1	0
Africa	ZAF_870	2847	886	1089	3220	2020	1738	2307	439	2078	1991	2588	1411	2377	1166	1607	2081	1671	1737	2854	1059	1737	1720	1679	1765	2857	1006	1753	1651	3	0	0	1	0	0	0	0
Africa	ZAF_872	2846	881	1087	3215	2020	1736	2303	438	2080	1988	2589	1409	2372	1168	1607	2079	1623	1787	2863	1009	1801	1902	2026	1641	2887	1179	1744	1639	7	0	0	0	0	0	0	1
Africa	ZAF_873	2827	877	1083	3190	2009	1733	2288	437	2063	1981	2575	1403	2355	1161	1603	2071	1672	1744	2823	1140	1723	2034	1880	1822	2867	1009	1721	1645	7	0	0	0	0	0	0	1
Africa	ZAF_874	2749	853	1046	3138	1953	1689	2240	425	2032	1941	2509	1383	2320	1118	1564	1998	1593	1667	2760	1003	1680	1690	1716	1693	2710	1013	1698	1619	2	0	1	0	0	0	0	0
Africa	ZAF_879	2670	835	1041	3028	1911	1651	2171	426	1973	1888	2449	1336	2240	1114	1527	1963	1552	1702	2644	1086	1637	1944	1795	1746	2670	971	1653	1543	2	0	1	0	0	0	0	0
Africa	ZAF_88	2844	883	1087	3219	2018	1738	2307	439	2078	1991	2590	1409	2377	1166	1610	2077	1613	1733	2890	1041	1847	1847	2027	1683	2861	1151	1805	1567	6	0	0	0	0	0	1	0
Africa	ZAF_884	2877	883	1093	3218	2021	1736	2306	437	2079	1991	2591	1408	2377	1167	1607	2080	1573	1729	2860	1038	1839	1813	2068	1635	2805	1249	1776	1593	7	0	0	0	0	0	0	1
Africa	ZAF_885	2776	870	1066	3160	1993	1696	2274	434	2045	1955	2541	1389	2344	1154	1563	2055	1579	1686	2862	1095	1671	1673	1723	1725	2748	1043	1791	1576	3	0	0	1	0	0	0	0
Africa	ZAF_889	2846	887	1094	3220	2021	1743	2303	438	2079	1993	2587	1411	2377	1168	1606	2083	1657	1804	2850	987	1875	1976	2052	1701	2944	1118	1746	1618	7	0	0	0	0	0	0	1
Africa	ZAF_89	2847	886	1088	3220	2022	1738	2306	438	2080	1992	2589	1413	2376	1166	1608	2083	1680	1680	2941	1060	1833	1883	2089	1663	2896	1190	1761	1642	7	0	0	0	0	0	0	1
Africa	ZAF_894	2841	880	1089	3216	2017	1738	2307	438	2078	1989	2588	1413	2372	1166	1609	2080	1623	1788	2862	1010	1804	1901	2026	1641	2887	1180	1743	1638	7	0	0	0	0	0	0	1
Africa	ZAF_896	2644	828	1025	2985	1898	1619	2138	410	1936	1872	2432	1313	2202	1097	1493	1962	1462	1646	2737	960	1736	1725	1912	1626	2658	1120	1662	1524	3	0	0	1	0	0	0	0
Africa	ZAF_897	2848	884	1090	3224	2023	1740	2305	437	2079	1991	2591	1409	2375	1168	1608	2084	1657	1803	2850	988	1875	1978	2050	1700	2945	1116	1748	1617	7	0	0	0	0	0	0	1
Africa	ZAF_9	2649	810	1003	3037	1890	1610	2178	405	1940	1860	2433	1307	2240	1077	1505	1931	1545	1618	2653	1107	1591	1914	1731	1691	2708	941	1592	1494	2	0	1	0	0	0	0	0
Africa	ZAF_90	2806	871	1072	3178	2002	1726	2261	434	2061	1978	2559	1392	2348	1154	1588	2053	1632	1779	2819	979	1848	1955	2028	1679	2902	1110	1727	1598	7	0	0	0	0	0	0	1
Africa	ZAF_900	2841	883	1083	3215	2017	1737	2304	436	2075	1986	2587	1402	2373	1164	1610	2075	1601	1772	2866	1067	1718	1639	1696	1673	2838	1111	1789	1612	3	0	0	1	0	0	0	0
Africa	ZAF_902	2846	884	1091	3222	2024	1735	2305	438	2080	1988	2590	1410	2374	1167	1608	2082	1691	1724	2764	1095	1795	1629	1714	1696	2767	1082	1826	1583	6	0	0	0	0	0	1	0
Africa	ZAF_903	2632	810	1003	2929	1849	1578	2126	401	1903	1832	2411	1292	2155	1079	1478	1917	1500	1602	2588	952	1618	1573	1619	1604	2545	980	1613	1543	2	0	1	0	0	0	0	0
Africa	ZAF_906	2776	865	1067	3134	1974	1686	2251	431	2027	1950	2533	1377	2319	1142	1562	2034	1648	1648	2761	1011	1838	1842	2000	1659	2794	1093	1711	1551	2	0	1	0	0	0	0	0
Africa	ZAF_907	2844	887	1092	3215	2022	1737	2305	438	2076	1989	2586	1410	2375	1165	1608	2081	1564	1731	2823	1072	1718	1701	1681	1750	2807	1081	1701	1608	7	0	0	0	0	0	0	1
Africa	ZAF_908	2668	841	1015	3004	1895	1612	2177	400	1939	1857	2425	1322	2223	1076	1501	1961	1541	1610	2686	1105	1579	1908	1748	1688	2742	1004	1600	1550	3	0	0	1	0	0	0	0
Africa	ZAF_910	2784	865	1073	3161	1990	1700	2271	434	2047	1947	2542	1388	2336	1153	1575	2050	1659	1720	2787	1132	1717	2002	1853	1809	2834	998	1700	1622	3	0	0	1	0	0	0	0
Africa	ZAF_912	2841	879	1088	3216	2017	1736	2306	439	2078	1988	2589	1409	2374	1168	1608	2077	1653	1744	2802	1195	1714	2037	1855	1792	2889	1038	1720	1585	2	0	1	0	0	0	0	0
Africa	ZAF_913	2852	885	1093	3218	2021	1740	2310	437	2081	1988	2590	1412	2378	1169	1610	2084	1562	1732	2829	1073	1717	1702	1683	1750	2811	1084	1705	1610	7	0	0	0	0	0	0	1
Africa	ZAF_915	2847	886	1090	3220	2023	1736	2306	438	2080	1989	2591	1410	2375	1168	1608	2083	1563	1731	2828	1072	1718	1703	1681	1751	2810	1082	1702	1608	7	0	0	0	0	0	0	1
Africa	ZAF_916	2847	887	1089	3218	2022	1739	2304	438	2081	1990	2589	1413	2374	1167	1608	2083	1690	1727	2764	1095	1793	1625	1712	1695	2769	1086	1826	1583	6	0	0	0	0	0	1	0
Africa	ZAF_917	2794	877	1081	3161	1993	1720	2258	428	2047	1962	2546	1386	2335	1152	1578	2056	0	3	0	0	5	2	0	1	1	0	0	0	2	0	1	0	0	0	0	0
Africa	ZAF_921	2846	887	1092	3222	2022	1740	2307	439	2079	1992	2589	1409	2380	1168	1607	2081	1	1	0	0	7	1	0	1	0	0	0	0	1	1	0	0	0	0	0	0
Africa	ZAF_922	2859	886	1090	3218	2024	1740	2306	439	2081	1990	2590	1411	2377	1168	1611	2083	1627	1757	2871	1185	1716	2030	1877	1848	2890	1046	1747	1623	4	0	0	0	1	0	0	0
Africa	ZAF_923	2843	883	1087	3212	2021	1736	2301	439	2075	1987	2588	1403	2373	1167	1608	2078	1628	1773	2847	1106	1754	1702	1676	1733	2889	1106	1746	1614	3	0	0	1	0	0	0	0
Africa	ZAF_925	2848	886	1088	3216	2023	1736	2306	439	2078	1990	2589	1410	2376	1167	1607	2083	1611	1808	2912	1159	1619	2061	1823	1791	2971	1028	1707	1655	3	0	0	1	0	0	0	0
Africa	ZAF_926	2719	845	1053	3086	1945	1663	2203	422	1992	1921	2495	1336	2282	1129	1532	1995	1518	1700	2687	1098	1647	2006	1802	1763	2730	984	1610	1541	7	0	0	0	0	0	0	1
Africa	ZAF_928	2794	869	1066	3170	1998	1704	2263	433	2063	1954	2551	1392	2337	1153	1579	2048	1608	1754	2823	991	1780	1869	1995	1623	2845	1165	1717	1614	2	0	1	0	0	0	0	0
Africa	ZAF_931	2849	886	1089	3220	2023	1740	2305	439	2079	1993	2589	1413	2376	1166	1608	2084	2022	1740	2307	439	2082	1992	2588	1411	2377	1168	1609	2083	7	0	0	0	0	0	0	1
Africa	ZAF_933	2837	883	1092	3211	2018	1736	2301	437	2074	1990	2588	1405	2372	1166	1605	2079	1597	1711	2904	1044	1856	1835	2043	1679	2865	1183	1776	1567	6	0	0	0	0	0	1	0
Africa	ZAF_934	2847	887	1088	3216	2022	1738	2305	439	2079	1991	2589	1413	2373	1167	1608	2083	1603	1735	2901	1177	1681	2006	1886	1852	2845	1024	1772	1621	7	0	0	0	0	0	0	1
Africa	ZAF_935	2844	885	1093	3220	2022	1738	2306	437	2080	1992	2591	1411	2377	1166	1607	2082	1561	1733	2829	1073	1719	1703	1681	1750	2810	1083	1700	1607	7	0	0	0	0	0	0	1
Africa	ZAF_936	2840	881	1084	3212	2014	1736	2303	437	2076	1986	2584	1410	2370	1165	1606	2077	1638	1757	2783	1147	1704	2096	1896	1826	2852	1000	1709	1617	2	0	1	0	0	0	0	0
Africa	ZAF_937	2662	816	1009	3054	1898	1604	2183	406	1951	1880	2449	1315	2249	1080	1497	1938	1495	1631	2652	1005	1624	1594	1575	1651	2643	987	1637	1503	2	0	1	0	0	0	0	0
Africa	ZAF_941	2879	883	1089	3226	2020	1739	2309	439	2080	1991	2587	1414	2380	1166	1607	2082	1628	1793	2720	1081	1740	2117	1910	1880	2773	1018	1655	1713	6	0	0	0	0	0	1	0
Africa	ZAF_944	2746	842	1054	3082	1940	1671	2222	427	1985	1916	2505	1347	2268	1134	1560	2010	1613	1638	2761	1006	1763	1824	1985	1635	2735	1086	1691	1585	3	0	0	1	0	0	0	0
Africa	ZAF_947	2847	884	1090	3216	2022	1737	2304	439	2078	1989	2588	1409	2374	1168	1607	2082	1588	1773	2936	1079	1811	1865	1990	1721	2896	1173	1806	1594	3	0	0	1	0	0	0	0
Africa	ZAF_948	2847	886	1088	3219	2024	1739	2303	438	2081	1990	2590	1409	2376	1168	1608	2082	1691	1726	2763	1095	1793	1627	1713	1694	2770	1084	1826	1583	6	0	0	0	0	0	1	0
Africa	ZAF_95	2839	872	1086	3198	1998	1722	2291	434	2057	1975	2570	1394	2359	1161	1589	2063	1664	1743	2820	1138	1725	2027	1869	1827	2865	998	1722	1643	3	0	0	1	0	0	0	0
Africa	ZAF_950	2630	820	1006	2962	1868	1612	2139	408	1916	1847	2401	1313	2187	1077	1497	1927	1551	1604	2653	1143	1524	1911	1690	1688	2694	962	1549	1536	2	0	1	0	0	0	0	0
Africa	ZAF_953	2848	886	1089	3222	2022	1740	2308	438	2078	1990	2591	1410	2376	1168	1611	2083	1563	1732	2828	1071	1719	1703	1683	1750	2811	1083	1702	1611	7	0	0	0	0	0	0	1
Africa	ZAF_957	2844	883	1087	3216	2019	1737	2305	439	2077	1990	2589	1411	2372	1167	1608	2081	1614	1733	2888	1040	1847	1844	2027	1684	2859	1153	1805	1567	6	0	0	0	0	0	1	0
Africa	ZAF_96	2822	877	1083	3195	2004	1716	2282	436	2057	1971	2566	1391	2353	1159	1589	2060	1669	1704	2823	1034	1824	1888	2058	1662	2808	1137	1779	1611	6	0	0	0	0	0	1	0
Africa	ZAF_960	2840	882	1086	3211	2019	1736	2298	438	2076	1986	2588	1406	2365	1168	1608	2079	1652	1730	2823	1034	1732	1732	1759	1735	2782	1052	1740	1677	7	0	0	0	0	0	0	1
Africa	ZAF_961	2848	886	1087	3226	2016	1741	2314	437	2076	1988	2590	1409	2380	1169	1610	2081	1562	1731	2828	1070	1721	1703	1682	1746	2812	1082	1702	1610	7	0	0	0	0	0	0	1
Africa	ZAF_962	2849	885	1087	3218	2024	1741	2305	438	2081	1993	2589	1413	2377	1165	1609	2083	1620	1809	2796	1022	1710	1756	1625	1770	2862	998	1706	1660	6	0	0	0	0	0	1	0
Africa	ZAF_969	2849	887	1089	3221	2023	1741	2305	439	2080	1992	2589	1409	2379	1168	1608	2081	0	2	0	0	5	0	0	0	0	1	3	0	1	1	0	0	0	0	0	0
Africa	ZAF_971	2844	883	1088	3215	2022	1735	2304	438	2081	1989	2592	1409	2372	1168	1608	2080	1606	1719	2900	1110	1699	1705	1762	1749	2784	1056	1832	1604	6	0	0	0	0	0	1	0
Africa	ZAF_975	2852	886	1088	3223	2020	1742	2310	437	2079	1991	2592	1408	2381	1168	1612	2080	1627	1795	2720	1083	1738	2114	1910	1877	2775	1020	1658	1713	6	0	0	0	0	0	1	0
Africa	ZAF_977	2844	882	1087	3217	2018	1738	2305	438	2078	1990	2590	1409	2374	1167	1608	2079	1652	1732	2828	1035	1734	1733	1759	1736	2788	1052	1742	1678	6	0	0	0	0	0	1	0
Africa	ZAF_978	2825	874	1077	3201	2002	1728	2299	438	2067	1978	2573	1408	2362	1159	1603	2063	1613	1777	2848	1002	1797	1892	2014	1634	2872	1172	1736	1628	3	0	0	1	0	0	0	0
Africa	ZAF_98	2830	880	1081	3204	2009	1728	2289	435	2063	1978	2574	1395	2361	1160	1599	2066	1598	1801	2775	1016	1701	1745	1606	1763	2842	989	1694	1641	2	0	1	0	0	0	0	0
Africa	ZAF_980	2739	839	1038	3084	1939	1653	2222	420	1991	1899	2480	1350	2281	1114	1541	1991	1604	1684	2719	1090	1667	1952	1808	1771	2756	963	1661	1593	3	0	0	1	0	0	0	0
Africa	ZAF_984	2845	885	1090	3220	2024	1736	2304	438	2077	1990	2590	1407	2375	1166	1608	2081	1612	1810	2909	1159	1619	2061	1823	1787	2969	1027	1706	1654	3	0	0	1	0	0	0	0
Africa	ZAF_988	2829	877	1078	3205	2008	1728	2298	436	2067	1980	2581	1400	2362	1161	1604	2067	1665	1743	2828	1141	1728	2036	1877	1827	2862	1010	1721	1650	7	0	0	0	0	0	0	1
Africa	ZAF_99	2849	885	1089	3215	2021	1739	2308	438	2079	1992	2591	1413	2376	1166	1610	2083	1611	1811	2912	1159	1619	2063	1826	1790	2973	1028	1707	1656	3	0	0	1	0	0	0	0
Africa	ZAF_992	2843	880	1086	3223	2017	1739	2306	438	2078	1989	2587	1409	2377	1167	1607	2077	1621	1788	2865	1007	1807	1902	2026	1642	2888	1179	1743	1639	7	0	0	0	0	0	0	1
Africa	ZAF_993	2842	884	1092	3217	2019	1740	2304	438	2078	1990	2588	1411	2373	1167	1608	2082	1631	1777	2850	1108	1756	1705	1678	1734	2892	1109	1747	1613	3	0	0	1	0	0	0	0
Africa	ZAF_995	2845	887	1093	3216	2021	1739	2306	437	2078	1992	2590	1410	2375	1166	1608	2082	1670	1791	2853	1188	1673	2131	1858	1808	2985	1049	1656	1671	3	0	0	1	0	0	0	0
Africa	ZAF_997	2873	881	1091	3218	2018	1737	2306	437	2080	1989	2588	1409	2378	1167	1605	2078	1680	1750	2840	1146	1738	2043	1889	1836	2894	1013	1735	1659	7	0	0	0	0	0	0	1
Asia	ARE_11	2796	870	1066	3151	1991	1712	2243	431	2042	1949	2529	1377	2327	1143	1580	2037	1584	1724	2689	1068	1648	1636	1584	1658	2729	1082	1657	1615	7	0	0	0	0	0	0	1
Asia	ARE_14	2817	877	1079	3180	2000	1720	2274	434	2054	1961	2553	1391	2344	1153	1593	2055	1598	1741	2710	1076	1663	1652	1596	1672	2750	1092	1672	1630	7	0	0	0	0	0	0	1
Asia	ARE_15	2803	866	1072	3182	1988	1704	2262	429	2044	1948	2539	1380	2333	1145	1579	2040	1587	1722	2702	1068	1658	1642	1590	1664	2732	1083	1661	1624	7	0	0	0	0	0	0	1
Asia	ARE_16	2884	887	1093	3219	2023	1740	2308	440	2078	1992	2589	1411	2378	1167	1610	2083	0	1	0	0	5	0	2	0	0	1	3	0	1	1	0	0	0	0	0	0
Asia	ARE_18	2819	876	1077	3185	2002	1718	2274	434	2055	1959	2552	1390	2345	1152	1593	2054	1597	1741	2711	1075	1663	1653	1595	1672	2749	1092	1674	1631	7	0	0	0	0	0	0	1
Asia	ARE_20	2805	866	1074	3173	1988	1702	2261	429	2045	1950	2542	1384	2328	1146	1577	2044	1589	1723	2698	1068	1657	1641	1592	1665	2730	1084	1661	1624	7	0	0	0	0	0	0	1
Asia	ARE_21	2790	867	1074	3132	1973	1706	2257	430	2026	1947	2533	1371	2325	1141	1579	2028	1588	1726	2672	1068	1644	1636	1583	1650	2723	1078	1657	1614	7	0	0	0	0	0	0	1
Asia	ARE_23	2806	866	1068	3170	1992	1703	2259	430	2048	1950	2541	1385	2329	1144	1580	2043	1588	1722	2699	1068	1655	1640	1589	1665	2733	1085	1662	1623	7	0	0	0	0	0	0	1
Asia	ARE_25	2804	867	1072	3173	1989	1702	2262	428	2046	1949	2543	1383	2329	1145	1579	2043	1589	1723	2698	1069	1657	1642	1589	1666	2732	1083	1661	1623	7	0	0	0	0	0	0	1
Asia	ARE_36	2817	872	1083	3181	1997	1719	2276	433	2055	1960	2554	1391	2345	1154	1592	2053	1607	1744	2702	1072	1673	1638	1602	1679	2722	1091	1688	1646	7	0	0	0	0	0	0	1
Asia	ARE_38	2818	873	1079	3175	2000	1720	2276	434	2058	1959	2549	1400	2343	1150	1594	2057	1597	1740	2711	1075	1664	1650	1597	1673	2749	1094	1675	1630	7	0	0	0	0	0	0	1
Asia	ARE_5	2817	873	1079	3176	1998	1721	2274	435	2056	1960	2555	1393	2341	1157	1594	2056	1598	1741	2709	1076	1663	1652	1598	1673	2749	1091	1671	1630	7	0	0	0	0	0	0	1
Asia	ARE_6	2819	872	1075	3184	1997	1718	2279	435	2056	1959	2552	1393	2348	1154	1592	2052	1596	1739	2713	1074	1665	1654	1597	1670	2749	1091	1674	1630	7	0	0	0	0	0	0	1
Asia	ARE_8	2794	868	1073	3135	1976	1705	2257	427	2028	1948	2532	1370	2329	1139	1577	2029	1585	1724	2677	1067	1646	1634	1582	1653	2722	1080	1660	1615	7	0	0	0	0	0	0	1
Asia	BGD_1	2846	884	1092	3218	2021	1739	2308	437	2078	1988	2589	1411	2374	1166	1611	2082	1646	1695	2878	1075	1915	1834	2054	1726	2840	1148	1843	1537	7	0	0	0	0	0	0	1
Asia	BGD_2	2845	884	1086	3217	2024	1734	2304	439	2077	1991	2591	1409	2372	1166	1607	2082	1649	1693	2878	1072	1915	1835	2055	1724	2840	1148	1842	1535	7	0	0	0	0	0	0	1
Asia	BGD_4	2847	887	1093	3212	2023	1739	2309	436	2082	1990	2590	1415	2376	1165	1610	2084	1603	1734	2902	1178	1680	2008	1886	1855	2849	1021	1770	1622	6	0	0	0	0	0	1	0
Asia	BGD_5	2847	885	1087	3213	2023	1736	2303	439	2079	1990	2590	1411	2371	1168	1607	2083	1650	1694	2876	1072	1915	1834	2055	1725	2841	1149	1842	1535	7	0	0	0	0	0	0	1
Asia	BGD_7	2849	888	1094	3218	2023	1742	2310	441	2083	1993	2589	1418	2378	1167	1612	2084	1646	1766	2906	1192	1666	2092	1881	1834	2939	1063	1681	1681	4	0	0	0	1	0	0	0
Asia	BHR_1	2840	883	1089	3211	2022	1733	2298	439	2071	1986	2581	1407	2368	1162	1605	2080	1650	1795	2845	986	1869	1968	2046	1700	2933	1116	1744	1614	3	0	0	1	0	0	0	0
Asia	CHN_1	2883	888	1092	3213	2023	1741	2309	437	2079	1990	2588	1412	2378	1165	1611	2084	436	437	713	308	496	402	431	499	684	326	453	461	1	1	0	0	0	0	0	0
Asia	CHN_101	2879	887	1093	3211	2022	1741	2308	439	2081	1990	2589	1414	2376	1168	1611	2084	1530	1696	2771	1026	1682	1662	1638	1711	2770	1031	1668	1565	2	0	1	0	0	0	0	0
Asia	CHN_106	2847	885	1092	3215	2019	1740	2304	440	2080	1991	2587	1414	2375	1167	1608	2080	1599	1751	2975	1076	1835	1867	2018	1765	2888	1155	1822	1612	3	0	0	1	0	0	0	0
Asia	CHN_110	2881	887	1094	3216	2023	1741	2310	437	2081	1992	2589	1413	2381	1164	1611	2082	0	1	0	0	6	0	0	1	0	0	3	0	1	1	0	0	0	0	0	0
Asia	CHN_114	2880	888	1093	3216	2023	1742	2308	438	2081	1990	2590	1412	2377	1168	1612	2084	0	0	0	0	2	0	0	1	0	0	0	0	1	1	0	0	0	0	0	0
Asia	CHN_115	2796	860	1060	3150	1974	1707	2282	409	2025	1940	2526	1374	2348	1123	1580	2037	1609	1733	2767	1012	1803	1910	1891	1694	2893	1073	1658	1566	2	0	1	0	0	0	0	0
Asia	CHN_12	2815	867	1076	3165	1997	1720	2281	438	2055	1964	2561	1395	2343	1160	1595	2055	1598	1743	2703	1075	1658	1657	1605	1660	2749	1088	1675	1626	2	0	1	0	0	0	0	0
Asia	CHN_121	2843	883	1092	3216	2018	1738	2308	438	2078	1989	2589	1411	2375	1168	1608	2081	1606	1719	2900	1111	1700	1705	1764	1748	2784	1056	1832	1606	7	0	0	0	0	0	0	1
Asia	CHN_122	2878	883	1091	3212	2021	1740	2307	439	2081	1989	2589	1412	2376	1168	1612	2081	1652	1730	2865	1223	1648	2064	1827	1831	2924	1043	1676	1663	6	0	0	0	0	0	1	0
Asia	CHN_123	2846	885	1092	3214	2020	1738	2306	438	2077	1990	2589	1411	2374	1167	1607	2083	1663	1784	2861	1066	1756	1766	1738	1780	2859	1022	1799	1649	2	0	1	0	0	0	0	0
Asia	CHN_128	2836	882	1075	3172	2007	1720	2282	440	2062	1960	2557	1404	2342	1156	1600	2065	1598	1754	2851	1158	1712	1961	1892	1787	2856	1090	1765	1602	3	0	0	1	0	0	0	0
Asia	CHN_14	2646	831	1031	3064	1901	1625	2199	421	1971	1878	2451	1352	2246	1112	1506	1971	1514	1664	2581	1029	1600	1597	1532	1596	2637	1050	1584	1547	2	0	1	0	0	0	0	0
Asia	CHN_16	2896	886	1092	3211	2021	1741	2307	439	2080	1989	2588	1413	2375	1168	1611	2084	1586	1775	2938	1080	1811	1863	1993	1723	2903	1175	1813	1596	4	0	0	0	1	0	0	0
Asia	CHN_17	2842	884	1090	3215	2018	1741	2306	439	2079	1988	2587	1413	2373	1168	1611	2081	1606	1718	2901	1111	1699	1707	1766	1751	2784	1055	1832	1606	7	0	0	0	0	0	0	1
Asia	CHN_18	2880	886	1090	3214	2021	1740	2306	439	2078	1985	2583	1411	2375	1166	1611	2081	1585	1715	2806	1050	1677	1680	1672	1704	2798	1024	1743	1593	6	0	0	0	0	0	1	0
Asia	CHN_19	2880	888	1093	3217	2023	1741	2309	439	2081	1987	2587	1413	2377	1168	1612	2084	788	785	1230	424	822	813	817	799	1249	489	727	830	1	1	0	0	0	0	0	0
Asia	CHN_20	2866	884	1090	3213	2021	1740	2307	439	2078	1989	2589	1413	2373	1168	1611	2085	1625	1787	2846	1073	1723	1650	1648	1712	2865	1109	1753	1655	6	0	0	0	0	0	1	0
Asia	CHN_22	2882	889	1095	3217	2024	1741	2306	437	2083	1990	2588	1414	2377	1165	1611	2083	1	0	1	0	2	3	2	1	1	0	1	0	1	1	0	0	0	0	0	0
Asia	CHN_27	2880	888	1092	3216	2021	1742	2310	437	2079	1992	2592	1412	2377	1168	1611	2085	0	1	0	0	4	1	0	1	1	0	0	0	1	1	0	0	0	0	0	0
Asia	CHN_30	2843	883	1088	3210	2024	1734	2301	438	2077	1986	2587	1407	2369	1164	1609	2081	1607	1786	2908	1113	1677	1941	1854	1785	2884	1057	1760	1659	2	0	1	0	0	0	0	0
Asia	CHN_32	2843	884	1091	3212	2019	1740	2306	438	2080	1988	2589	1412	2373	1168	1611	2081	1606	1719	2900	1110	1699	1705	1766	1750	2784	1056	1832	1607	7	0	0	0	0	0	0	1
Asia	CHN_34	2839	881	1091	3213	2018	1737	2301	438	2076	1988	2586	1409	2370	1166	1607	2078	1682	1750	2834	1145	1737	2041	1888	1834	2880	1011	1729	1652	2	0	1	0	0	0	0	0
Asia	CHN_36	2843	885	1091	3212	2020	1740	2305	438	2080	1988	2589	1411	2373	1168	1611	2081	1606	1719	2900	1110	1699	1705	1766	1751	2784	1056	1832	1607	7	0	0	0	0	0	0	1
Asia	CHN_38	2790	862	1064	3143	1974	1701	2267	435	2033	1942	2533	1386	2325	1149	1578	2038	1582	1720	2683	1067	1646	1636	1592	1643	2719	1082	1663	1610	3	0	0	1	0	0	0	0
Asia	CHN_39	2866	888	1092	3216	2023	1741	2307	439	2081	1989	2588	1413	2376	1168	1612	2084	1683	1681	2940	1063	1833	1881	2089	1665	2901	1191	1763	1643	4	0	0	0	1	0	0	0
Asia	CHN_40	2880	886	1094	3219	2022	1741	2309	438	2080	1991	2590	1412	2378	1168	1610	2084	0	1	0	0	4	1	0	0	0	0	0	0	1	1	0	0	0	0	0	0
Asia	CHN_42	2843	885	1092	3213	2020	1740	2304	439	2080	1988	2587	1412	2373	1168	1610	2081	1606	1719	2900	1110	1699	1706	1767	1752	2783	1056	1832	1607	7	0	0	0	0	0	0	1
Asia	CHN_43	2845	884	1089	3212	2022	1736	2303	439	2078	1988	2587	1409	2374	1167	1607	2081	1600	1735	2899	1177	1677	2008	1884	1851	2844	1020	1770	1619	6	0	0	0	0	0	1	0
Asia	CHN_45	2877	886	1090	3212	2021	1740	2305	439	2080	1985	2584	1410	2376	1167	1611	2079	1564	1700	2891	937	1793	1814	2035	1666	2808	1123	1743	1630	3	0	0	1	0	0	0	0
Asia	CHN_47	2880	888	1093	3217	2021	1742	2310	439	2079	1990	2589	1413	2377	1168	1612	2084	0	0	0	0	3	0	0	1	0	0	0	0	1	1	0	0	0	0	0	0
Asia	CHN_5	2880	887	1089	3214	2022	1740	2304	439	2079	1986	2584	1413	2372	1166	1611	2083	1593	1721	2770	1057	1703	1640	1633	1705	2786	1042	1740	1584	6	0	0	0	0	0	1	0
Asia	CHN_50	2866	884	1091	3210	2021	1740	2307	439	2080	1989	2589	1414	2374	1167	1612	2083	1626	1787	2845	1074	1723	1650	1648	1712	2865	1109	1753	1655	6	0	0	0	0	0	1	0
Asia	CHN_52	2497	781	943	2823	1780	1513	2031	383	1834	1731	2252	1244	2095	1015	1397	1827	1420	1544	2557	923	1503	1536	1504	1536	2551	956	1518	1480	2	0	1	0	0	0	0	0
Asia	CHN_53	2880	888	1092	3215	2023	1742	2307	439	2081	1990	2589	1413	2377	1168	1612	2084	1631	1798	2715	1082	1738	2115	1911	1883	2774	1019	1658	1713	4	0	0	0	1	0	0	0
Asia	CHN_54	2850	885	1093	3214	2021	1741	2304	440	2082	1992	2588	1414	2376	1167	1610	2081	1669	1744	2853	1059	1735	1718	1681	1769	2857	1007	1756	1654	2	0	1	0	0	0	0	0
Asia	CHN_6	2880	888	1092	3216	2022	1742	2309	439	2081	1990	2589	1413	2378	1168	1612	2083	0	0	0	0	1	1	0	0	0	0	0	0	1	1	0	0	0	0	0	0
Asia	CHN_64	2844	882	1092	3212	2020	1737	2303	438	2078	1989	2587	1410	2373	1167	1606	2081	1669	1739	2850	1060	1735	1716	1677	1764	2853	1006	1753	1648	2	0	1	0	0	0	0	0
Asia	CHN_69	2867	890	1096	3209	2022	1741	2308	438	2082	1991	2590	1413	2378	1172	1606	2087	1	4	3	1	3	1	1	5	5	3	0	0	1	1	0	0	0	0	0	0
Asia	CHN_70	2880	888	1092	3219	2025	1740	2308	439	2081	1989	2589	1411	2378	1168	1611	2084	1	1	1	0	3	0	1	0	0	2	3	0	1	1	0	0	0	0	0	0
Asia	CHN_71	2847	887	1092	3211	2023	1741	2307	439	2081	1990	2589	1415	2374	1167	1612	2085	1603	1737	2900	1178	1679	2007	1887	1855	2848	1022	1772	1622	6	0	0	0	0	0	1	0
Asia	CHN_73	2718	853	1050	3076	1920	1663	2187	414	2004	1900	2471	1363	2256	1124	1526	1987	1523	1722	2757	1099	1674	1904	1779	1746	2806	1059	1632	1561	7	0	0	0	0	0	0	1
Asia	CHN_75	2850	889	1092	3219	2025	1745	2310	440	2084	1991	2591	1415	2379	1171	1614	2087	1664	1741	2897	1014	1841	1893	2044	1738	2839	1149	1752	1688	2	0	1	0	0	0	0	0
Asia	CHN_80	2829	878	1090	3203	2008	1730	2291	441	2068	1981	2577	1403	2359	1162	1605	2064	1573	1811	2870	1144	1742	1996	1850	1822	2924	1098	1703	1618	2	0	1	0	0	0	0	0
Asia	CHN_86	2880	888	1095	3221	2023	1743	2304	438	2081	1991	2589	1411	2376	1168	1611	2083	2	1	0	0	4	0	1	0	0	0	0	0	1	1	0	0	0	0	0	0
Asia	CHN_88	2845	888	1092	3212	2022	1741	2305	439	2081	1989	2588	1413	2375	1168	1610	2083	1692	1729	2761	1096	1792	1626	1713	1696	2771	1084	1826	1582	6	0	0	0	0	0	1	0
Asia	CHN_9	2880	888	1095	3215	2023	1742	2308	439	2081	1989	2588	1413	2377	1168	1612	2084	0	0	0	0	0	0	1	0	0	0	0	0	1	1	0	0	0	0	0	0
Asia	CHN_94	2744	861	1057	3148	1953	1683	2252	426	2019	1931	2517	1382	2302	1132	1561	2021	1564	1706	2660	1058	1641	1635	1576	1645	2697	1073	1634	1595	7	0	0	0	0	0	0	1
Asia	CHN_98	2844	884	1093	3216	2019	1739	2308	438	2079	1989	2589	1411	2376	1168	1608	2082	1622	1838	2775	1184	1721	2048	1787	1864	2885	1034	1726	1621	3	0	0	1	0	0	0	0
Asia	IDN_10	2840	881	1089	3207	2018	1737	2300	438	2074	1987	2584	1407	2370	1165	1607	2077	1611	1761	2732	1083	1680	1670	1621	1686	2771	1100	1692	1641	7	0	0	0	0	0	0	1
Asia	IDN_11	2880	885	1093	3226	2019	1741	2312	436	2078	1991	2592	1409	2380	1168	1610	2082	0	1	0	0	11	2	0	0	0	0	0	0	1	1	0	0	0	0	0	0
Asia	IDN_18	2849	875	1082	3207	2014	1721	2294	433	2070	1973	2573	1403	2361	1158	1593	2076	1582	1803	2866	1140	1745	1998	1847	1825	2945	1095	1699	1620	3	0	0	1	0	0	0	0
Asia	IDN_19	2881	885	1093	3224	2019	1740	2309	438	2080	1990	2590	1408	2382	1168	1610	2077	1625	1758	2872	1186	1716	2034	1877	1846	2889	1042	1747	1623	6	0	0	0	0	0	1	0
Asia	IDN_2	2878	888	1092	3212	2023	1741	2306	439	2081	1989	2589	1413	2374	1168	1612	2084	1622	1744	2860	1065	1841	1904	2102	1712	2797	1181	1828	1609	2	0	1	0	0	0	0	0
Asia	IDN_20	2878	888	1092	3215	2023	1740	2308	439	2081	1988	2589	1413	2376	1168	1612	2084	1627	1757	2872	1186	1714	2029	1876	1849	2891	1046	1747	1622	6	0	0	0	0	0	1	0
Asia	IDN_21	2845	884	1089	3205	2016	1737	2302	435	2069	1981	2581	1403	2369	1163	1609	2078	1619	1698	2842	1033	1682	1713	1719	1744	2778	1033	1702	1691	7	0	0	0	0	0	0	1
Asia	IDN_23	2838	881	1090	3204	2016	1738	2301	438	2075	1986	2585	1407	2370	1168	1607	2077	1612	1761	2731	1085	1679	1671	1621	1687	2771	1099	1691	1640	7	0	0	0	0	0	0	1
Asia	IDN_25	2845	886	1094	3222	2019	1742	2311	437	2079	1991	2591	1410	2380	1168	1611	2080	1616	1811	2800	1023	1708	1756	1627	1768	2860	998	1705	1659	3	0	0	1	0	0	0	0
Asia	IDN_4	2873	884	1093	3224	2018	1739	2314	436	2081	1987	2590	1412	2381	1167	1611	2080	1624	1760	2874	1185	1717	2036	1876	1847	2889	1042	1747	1621	6	0	0	0	0	0	1	0
Asia	IDN_6	2853	889	1093	3220	2024	1745	2310	440	2081	1993	2590	1418	2376	1167	1614	2089	7	5	10	0	1	0	0	1	0	0	0	0	1	1	0	0	0	0	0	0
Asia	IDN_8	2673	838	1027	2964	1917	1631	2138	419	1940	1880	2437	1314	2212	1101	1505	1956	1548	1618	2695	1164	1575	1916	1732	1716	2764	974	1609	1483	2	0	1	0	0	0	0	0
Asia	IDN_9	2878	885	1094	3224	2021	1741	2311	437	2078	1992	2592	1408	2381	1168	1610	2082	0	1	1	0	11	1	1	1	0	0	0	0	1	1	0	0	0	0	0	0
Asia	IND_10	2884	887	1091	3220	2023	1741	2307	439	2078	1991	2589	1409	2379	1167	1611	2082	2022	1741	2307	439	2082	1990	2588	1409	2378	1168	1613	2084	4	0	0	0	1	0	0	0
Asia	IND_100	2846	886	1090	3216	2022	1739	2306	440	2080	1990	2589	1411	2376	1167	1610	2080	1689	1730	2762	1095	1794	1627	1712	1696	2771	1084	1826	1583	6	0	0	0	0	0	1	0
Asia	IND_101	2848	883	1092	3216	2021	1740	2305	438	2079	1987	2587	1411	2375	1166	1612	2081	1625	1837	2773	1182	1722	2048	1789	1863	2888	1033	1728	1622	6	0	0	0	0	0	1	0
Asia	IND_103	2839	883	1091	3206	2017	1737	2301	437	2074	1988	2585	1408	2367	1165	1607	2079	1602	1716	2893	1111	1696	1703	1761	1748	2781	1054	1830	1606	2	0	1	0	0	0	0	0
Asia	IND_104	2844	881	1085	3207	2021	1733	2296	436	2073	1985	2586	1405	2367	1163	1606	2078	1606	1770	2891	1194	1675	2021	1836	1858	2885	1047	1735	1649	3	0	0	1	0	0	0	0
Asia	IND_106	2835	880	1089	3205	2011	1739	2303	436	2065	1985	2580	1402	2372	1162	1607	2074	1641	1735	2839	1032	1876	1830	2067	1645	2829	1210	1786	1604	2	0	1	0	0	0	0	0
Asia	IND_107	2875	882	1088	3212	2019	1735	2304	440	2075	1989	2587	1405	2376	1166	1607	2074	1607	1751	2801	1085	1738	1676	1656	1740	2819	1068	1756	1608	6	0	0	0	0	0	1	0
Asia	IND_108	2844	883	1091	3213	2020	1739	2304	437	2078	1989	2590	1409	2373	1169	1608	2082	1626	1787	2844	1073	1722	1650	1647	1709	2855	1108	1748	1651	6	0	0	0	0	0	1	0
Asia	IND_11	2842	868	1083	3175	1991	1721	2279	435	2054	1962	2559	1389	2346	1158	1595	2050	1584	1704	2862	1099	1677	1693	1745	1724	2765	1043	1818	1587	2	0	1	0	0	0	0	0
Asia	IND_110	2839	881	1091	3211	2016	1737	2303	438	2076	1989	2586	1411	2371	1165	1607	2078	1622	1762	2852	1080	1692	1690	1694	1738	2790	1057	1788	1653	7	0	0	0	0	0	0	1
Asia	IND_112	2875	882	1092	3212	2018	1735	2304	437	2076	1987	2589	1407	2371	1168	1606	2079	1607	1719	2892	1113	1701	1703	1759	1748	2791	1052	1841	1606	7	0	0	0	0	0	0	1
Asia	IND_113	2846	881	1091	3220	2016	1736	2310	436	2076	1991	2590	1410	2377	1165	1607	2078	1651	1729	2865	1223	1649	2068	1825	1825	2915	1041	1670	1658	6	0	0	0	0	0	1	0
Asia	IND_115	2849	891	1091	3221	2024	1742	2304	439	2078	1992	2588	1409	2377	1166	1611	2082	1684	1801	2785	939	1914	1950	2088	1684	2875	1134	1746	1650	7	0	0	0	0	0	0	1
Asia	IND_117	2852	879	1082	3201	2008	1728	2290	439	2056	1980	2574	1396	2356	1161	1598	2072	1631	1762	2811	1171	1690	2028	1812	1808	2910	1049	1670	1636	7	0	0	0	0	0	0	1
Asia	IND_118	2875	884	1088	3221	2019	1740	2306	439	2077	1988	2588	1408	2375	1168	1610	2079	1606	1719	2900	1111	1700	1705	1763	1747	2796	1056	1840	1607	7	0	0	0	0	0	0	1
Asia	IND_119	2845	883	1092	3221	2016	1740	2309	438	2077	1989	2591	1409	2375	1169	1611	2079	1605	1720	2902	1112	1703	1706	1766	1749	2785	1055	1834	1606	7	0	0	0	0	0	0	1
Asia	IND_12	2878	882	1092	3216	2019	1738	2307	439	2078	1990	2586	1410	2375	1166	1608	2077	1652	1804	2851	987	1873	1976	2049	1700	2946	1115	1748	1619	2	0	1	0	0	0	0	0
Asia	IND_120	2842	882	1091	3219	2019	1736	2307	438	2074	1991	2589	1408	2375	1166	1606	2080	1604	1718	2902	1110	1702	1704	1763	1748	2784	1055	1831	1604	7	0	0	0	0	0	0	1
Asia	IND_121	2396	770	934	2677	1724	1477	1943	370	1761	1693	2223	1190	1988	1007	1370	1783	1386	1465	2471	961	1442	1447	1522	1476	2368	917	1549	1386	3	0	0	1	0	0	0	0
Asia	IND_122	2845	883	1092	3222	2019	1739	2307	436	2078	1992	2590	1407	2380	1166	1608	2078	1569	1728	2866	1038	1838	1812	2069	1633	2799	1249	1774	1589	7	0	0	0	0	0	0	1
Asia	IND_123	2862	879	1090	3210	2011	1733	2304	435	2072	1984	2584	1403	2372	1166	1601	2073	1600	1712	2896	1110	1694	1703	1763	1742	2789	1054	1833	1602	7	0	0	0	0	0	0	1
Asia	IND_124	2781	868	1067	3135	1999	1706	2260	434	2036	1945	2537	1378	2327	1148	1584	2054	1624	1664	2821	1056	1874	1811	2011	1698	2780	1123	1809	1513	2	0	1	0	0	0	0	0
Asia	IND_128	2844	881	1088	3216	2020	1739	2307	436	2080	1989	2592	1409	2375	1167	1611	2080	1605	1719	2900	1111	1700	1706	1763	1748	2785	1055	1833	1606	7	0	0	0	0	0	0	1
Asia	IND_129	2848	886	1089	3224	2022	1739	2308	439	2078	1989	2588	1410	2378	1166	1610	2081	1626	1756	2871	1184	1716	2034	1876	1848	2888	1042	1744	1622	3	0	0	1	0	0	0	0
Asia	IND_13	2839	880	1091	3217	2013	1736	2308	437	2073	1990	2586	1409	2376	1163	1606	2075	1620	1761	2855	1080	1693	1693	1694	1736	2790	1054	1789	1653	7	0	0	0	0	0	0	1
Asia	IND_130	2879	887	1089	3222	2021	1741	2307	439	2078	1989	2588	1409	2377	1168	1611	2081	1601	1736	2901	1177	1682	2007	1887	1852	2846	1023	1776	1623	7	0	0	0	0	0	0	1
Asia	IND_131	2817	871	1083	3161	1996	1720	2284	431	2045	1975	2566	1382	2354	1151	1591	2052	1599	1746	2697	1075	1661	1654	1604	1667	2745	1086	1678	1628	2	0	1	0	0	0	0	0
Asia	IND_132	2819	880	1083	3185	2000	1721	2276	436	2060	1969	2556	1396	2348	1157	1589	2052	1604	1741	2836	1175	1699	2013	1855	1834	2854	1035	1731	1605	3	0	0	1	0	0	0	0
Asia	IND_135	2359	765	933	2670	1716	1463	1926	376	1757	1692	2213	1181	1980	1005	1359	1773	1437	1451	2427	866	1556	1579	1788	1441	2363	974	1516	1394	2	0	1	0	0	0	0	0
Asia	IND_137	2844	883	1088	3224	2018	1740	2309	436	2075	1988	2589	1406	2377	1167	1610	2080	1603	1719	2903	1111	1700	1708	1762	1748	2787	1054	1833	1606	7	0	0	0	0	0	0	1
Asia	IND_139	2878	883	1091	3218	2021	1739	2305	437	2078	1988	2588	1408	2375	1168	1607	2082	1606	1719	2900	1110	1699	1706	1764	1748	2796	1055	1840	1611	7	0	0	0	0	0	0	1
Asia	IND_14	2846	881	1088	3214	2021	1735	2302	438	2075	1988	2587	1407	2370	1165	1607	2080	1645	1690	2876	1073	1916	1833	2054	1721	2840	1147	1840	1534	7	0	0	0	0	0	0	1
Asia	IND_144	2846	885	1090	3221	2019	1738	2307	438	2073	1992	2589	1407	2376	1166	1607	2081	1649	1798	2904	1041	1709	1696	1702	1745	2851	1053	1793	1706	2	0	1	0	0	0	0	0
Asia	IND_145	2846	885	1093	3218	2019	1740	2308	438	2079	1989	2590	1410	2377	1169	1609	2081	1599	1752	2975	1076	1835	1866	2018	1762	2890	1156	1821	1612	3	0	0	1	0	0	0	0
Asia	IND_146	2845	884	1092	3213	2021	1738	2304	438	2077	1991	2590	1408	2374	1167	1609	2080	1573	1729	2859	1039	1834	1811	2067	1634	2799	1250	1771	1589	6	0	0	0	0	0	1	0
Asia	IND_148	2879	887	1089	3221	2024	1738	2306	439	2078	1989	2590	1408	2376	1167	1610	2082	1689	1729	2764	1094	1794	1626	1712	1695	2773	1085	1830	1585	6	0	0	0	0	0	1	0
Asia	IND_15	2852	886	1094	3220	2021	1741	2309	438	2080	1990	2590	1410	2379	1169	1610	2082	1618	1811	2797	1023	1708	1756	1627	1769	2860	998	1707	1660	7	0	0	0	0	0	0	1
Asia	IND_150	2845	879	1090	3209	2022	1734	2303	437	2079	1985	2586	1413	2367	1164	1608	2083	1644	1691	2876	1073	1915	1831	2052	1723	2840	1149	1840	1534	7	0	0	0	0	0	0	1
Asia	IND_154	2835	875	1082	3201	2010	1729	2286	434	2066	1978	2572	1399	2359	1162	1596	2068	1630	1676	2861	1065	1906	1824	2050	1719	2827	1142	1830	1527	2	0	1	0	0	0	0	0
Asia	IND_155	2846	886	1092	3211	2024	1740	2305	439	2082	1991	2589	1414	2375	1166	1611	2082	1626	1716	2837	1108	1866	1883	2070	1755	2761	1191	1819	1598	3	0	0	1	0	0	0	0
Asia	IND_156	2874	883	1089	3213	2018	1735	2307	438	2077	1988	2590	1408	2374	1167	1607	2078	1561	1761	2945	1024	1852	1833	2034	1724	2869	1192	1801	1612	6	0	0	0	0	0	1	0
Asia	IND_157	2769	865	1075	3123	1968	1699	2238	427	2025	1947	2530	1368	2313	1137	1574	2018	1608	1699	2785	1191	1605	2016	1791	1776	2835	1024	1633	1626	2	0	1	0	0	0	0	0
Asia	IND_158	2799	877	1082	3171	1987	1717	2255	429	2054	1962	2545	1389	2336	1149	1580	2037	1639	1719	2808	1041	1705	1704	1655	1744	2806	988	1726	1632	2	0	1	0	0	0	0	0
Asia	IND_16	2839	882	1090	3207	2017	1738	2302	438	2078	1988	2586	1409	2373	1168	1606	2078	1623	1760	2852	1081	1691	1690	1695	1740	2790	1057	1788	1653	7	0	0	0	0	0	0	1
Asia	IND_160	2881	886	1091	3220	2023	1741	2306	437	2080	1991	2591	1409	2377	1167	1611	2082	1656	1804	2851	988	1875	1978	2051	1703	2947	1116	1751	1619	7	0	0	0	0	0	0	1
Asia	IND_161	2853	886	1093	3218	2021	1742	2308	439	2081	1990	2588	1414	2378	1167	1612	2082	2021	1742	2309	439	2082	1991	2588	1413	2377	1167	1612	2084	4	0	0	0	1	0	0	0
Asia	IND_162	2845	884	1086	3217	2019	1739	2307	437	2078	1991	2589	1410	2376	1165	1608	2079	1604	1717	2903	1110	1699	1705	1762	1748	2785	1056	1833	1606	7	0	0	0	0	0	0	1
Asia	IND_163	2880	886	1088	3220	2021	1740	2307	438	2081	1989	2590	1409	2379	1168	1610	2079	1693	1719	2856	1046	1842	1900	2075	1674	2841	1147	1800	1633	4	0	0	0	1	0	0	0
Asia	IND_164	2833	876	1083	3197	2006	1735	2289	433	2072	1976	2576	1404	2354	1163	1606	2068	1575	1807	2863	1140	1746	1999	1849	1822	2932	1096	1703	1618	3	0	0	1	0	0	0	0
Asia	IND_167	2421	782	955	2729	1742	1492	1977	382	1788	1721	2260	1211	2026	1025	1387	1801	1419	1512	2492	922	1600	1602	1762	1462	2459	987	1575	1346	3	0	0	1	0	0	0	0
Asia	IND_168	2876	882	1093	3219	2017	1739	2308	438	2078	1988	2586	1408	2379	1166	1609	2076	1624	1724	2864	1092	1744	1662	1735	1728	2807	1086	1810	1616	7	0	0	0	0	0	0	1
Asia	IND_17	2563	823	1010	2866	1843	1579	2084	396	1864	1808	2358	1271	2137	1064	1466	1909	1554	1575	2566	965	1681	1711	1872	1531	2551	1054	1642	1496	2	0	1	0	0	0	0	0
Asia	IND_170	2784	861	1060	3170	1971	1687	2262	427	2031	1960	2546	1379	2332	1134	1560	2027	1588	1744	2812	990	1772	1872	1988	1614	2842	1149	1708	1595	3	0	0	1	0	0	0	0
Asia	IND_173	2665	824	1028	2989	1920	1638	2168	414	1967	1875	2449	1332	2222	1108	1518	1979	1525	1617	2720	1051	1602	1614	1673	1648	2612	994	1722	1521	2	0	1	0	0	0	0	0
Asia	IND_175	2873	884	1087	3225	2021	1738	2304	438	2078	1987	2588	1406	2375	1168	1609	2079	1604	1718	2902	1109	1701	1706	1762	1749	2796	1055	1840	1606	7	0	0	0	0	0	0	1
Asia	IND_176	2859	882	1087	3213	2013	1732	2299	438	2066	1983	2580	1400	2367	1165	1601	2075	1599	1711	2892	1109	1693	1701	1760	1742	2785	1054	1833	1602	7	0	0	0	0	0	0	1
Asia	IND_177	2847	886	1089	3215	2024	1741	2303	438	2081	1990	2589	1411	2375	1169	1609	2084	1693	1729	2761	1094	1793	1627	1713	1695	2771	1084	1827	1585	2	0	1	0	0	0	0	0
Asia	IND_179	2872	882	1089	3218	2017	1736	2305	440	2075	1986	2584	1410	2373	1166	1607	2077	1604	1717	2898	1110	1700	1706	1761	1747	2792	1055	1837	1607	7	0	0	0	0	0	0	1
Asia	IND_18	2836	879	1088	3190	2015	1731	2298	438	2070	1982	2579	1406	2365	1163	1605	2074	1622	1759	2841	1077	1687	1688	1692	1735	2784	1054	1787	1649	3	0	0	1	0	0	0	0
Asia	IND_180	2468	787	965	2755	1774	1515	1988	387	1789	1738	2276	1215	2030	1032	1415	1836	1390	1519	2497	933	1601	1579	1830	1434	2420	1105	1546	1405	2	0	1	0	0	0	0	0
Asia	IND_181	2847	886	1093	3225	2020	1741	2308	436	2079	1993	2590	1408	2382	1166	1608	2079	1654	1804	2853	988	1878	1980	2052	1701	2946	1117	1748	1617	7	0	0	0	0	0	0	1
Asia	IND_182	2814	872	1086	3163	1992	1720	2286	430	2047	1973	2565	1383	2356	1153	1589	2050	1600	1745	2698	1074	1664	1655	1606	1666	2744	1085	1677	1626	2	0	1	0	0	0	0	0
Asia	IND_184	2876	883	1086	3220	2020	1738	2308	439	2076	1989	2589	1410	2374	1165	1611	2081	1642	1768	2831	1176	1700	2038	1822	1817	2930	1052	1687	1646	6	0	0	0	0	0	1	0
Asia	IND_186	2836	881	1087	3209	2014	1740	2301	434	2069	1984	2581	1402	2372	1164	1606	2077	1640	1735	2841	1033	1877	1829	2064	1649	2831	1211	1787	1604	2	0	1	0	0	0	0	0
Asia	IND_187	2845	882	1090	3222	2018	1737	2308	437	2078	1990	2588	1410	2377	1167	1606	2080	1653	1729	2863	1222	1651	2070	1826	1828	2914	1040	1670	1658	6	0	0	0	0	0	1	0
Asia	IND_189	2843	883	1092	3209	2019	1736	2301	438	2078	1986	2586	1411	2367	1167	1607	2081	1644	1692	2875	1074	1915	1832	2053	1724	2840	1149	1837	1532	7	0	0	0	0	0	0	1
Asia	IND_19	2845	879	1088	3205	2021	1734	2297	437	2071	1986	2585	1405	2367	1162	1608	2079	1606	1773	2887	1194	1674	2023	1838	1857	2884	1045	1736	1650	7	0	0	0	0	0	0	1
Asia	IND_190	2875	883	1091	3217	2019	1737	2306	438	2079	1987	2588	1410	2374	1168	1607	2081	1643	1769	2830	1177	1699	2036	1820	1818	2930	1052	1686	1644	6	0	0	0	0	0	1	0
Asia	IND_191	2840	879	1091	3212	2016	1737	2304	437	2077	1989	2587	1409	2374	1164	1608	2075	1619	1761	2856	1081	1691	1691	1695	1738	2790	1057	1788	1655	7	0	0	0	0	0	0	1
Asia	IND_196	2842	882	1091	3225	2015	1737	2311	439	2076	1986	2586	1409	2378	1169	1606	2077	1603	1716	2905	1111	1701	1706	1763	1748	2784	1055	1831	1604	7	0	0	0	0	0	0	1
Asia	IND_197	2192	664	811	2398	1529	1336	1757	343	1563	1491	1943	1065	1808	888	1237	1576	1248	1380	2100	778	1269	1235	1201	1261	2151	832	1273	1283	4	0	0	0	1	0	0	0
Asia	IND_198	2850	886	1094	3222	2021	1740	2309	438	2080	1990	2591	1410	2379	1169	1610	2082	2021	1740	2312	439	2082	1989	2590	1409	2376	1169	1611	2084	4	0	0	0	1	0	0	0
Asia	IND_199	2847	884	1087	3224	2021	1738	2306	435	2078	1990	2590	1406	2379	1167	1606	2081	1628	1784	2847	1073	1726	1655	1648	1709	2856	1106	1750	1654	7	0	0	0	0	0	0	1
Asia	IND_2	2875	883	1091	3210	2018	1737	2302	438	2076	1988	2587	1408	2371	1167	1607	2079	1641	1770	2824	1177	1699	2034	1818	1817	2927	1051	1685	1645	6	0	0	0	0	0	1	0
Asia	IND_200	2876	886	1093	3216	2019	1741	2306	437	2079	1989	2589	1412	2374	1168	1609	2083	1647	1792	2907	1044	1706	1707	1713	1754	2853	1046	1799	1704	2	0	1	0	0	0	0	0
Asia	IND_201	2724	850	1050	3088	1964	1671	2232	433	2015	1918	2499	1372	2295	1131	1554	2018	1528	1756	2770	1112	1692	1944	1785	1781	2849	1074	1633	1583	2	0	1	0	0	0	0	0
Asia	IND_205	2837	879	1089	3202	2011	1730	2302	438	2075	1987	2586	1408	2370	1165	1602	2073	1581	1761	2801	1135	1715	2078	1874	1840	2866	1011	1679	1592	2	0	1	0	0	0	0	0
Asia	IND_209	2844	883	1088	3213	2019	1737	2305	439	2080	1986	2588	1409	2374	1168	1610	2077	1688	1635	2887	1105	1663	1681	1741	1643	2839	1048	1753	1616	3	0	0	1	0	0	0	0
Asia	IND_212	2879	885	1089	3217	2023	1740	2305	439	2077	1991	2588	1410	2375	1166	1609	2084	1650	1799	2903	1040	1709	1696	1703	1747	2859	1055	1798	1710	2	0	1	0	0	0	0	0
Asia	IND_214	2877	881	1093	3216	2019	1741	2307	436	2081	1989	2589	1413	2377	1168	1608	2083	1598	1750	2976	1076	1835	1867	2019	1761	2896	1156	1825	1614	4	0	0	0	1	0	0	0
Asia	IND_215	2843	884	1089	3219	2021	1739	2306	438	2076	1989	2590	1408	2373	1166	1611	2081	1606	1718	2900	1111	1701	1705	1765	1749	2784	1056	1833	1605	7	0	0	0	0	0	0	1
Asia	IND_216	2841	882	1089	3208	2017	1736	2304	439	2075	1989	2588	1408	2372	1166	1608	2077	1623	1761	2852	1082	1691	1690	1694	1738	2792	1056	1790	1652	7	0	0	0	0	0	0	1
Asia	IND_217	2832	865	1065	3152	1984	1705	2261	433	2039	1947	2541	1380	2326	1152	1579	2043	1581	1690	2846	1088	1671	1674	1726	1714	2745	1038	1804	1579	3	0	0	1	0	0	0	0
Asia	IND_219	2846	883	1090	3220	2020	1735	2306	438	2075	1992	2590	1407	2376	1166	1605	2079	1646	1694	2876	1072	1917	1835	2054	1722	2839	1148	1839	1535	7	0	0	0	0	0	0	1
Asia	IND_22	1363	468	565	1531	1055	856	1118	260	1052	999	1310	683	1147	622	813	1052	823	867	1379	551	944	912	1066	844	1365	617	863	797	7	0	0	0	0	0	0	1
Asia	IND_221	2877	884	1088	3223	2017	1738	2310	438	2077	1987	2585	1411	2378	1164	1609	2077	1605	1714	2905	1110	1702	1707	1764	1748	2796	1055	1840	1608	7	0	0	0	0	0	0	1
Asia	IND_223	2876	883	1088	3216	2018	1740	2306	439	2078	1990	2588	1412	2374	1168	1608	2081	1605	1716	2902	1113	1699	1705	1764	1749	2796	1056	1840	1605	7	0	0	0	0	0	0	1
Asia	IND_225	2855	872	1083	3182	2004	1722	2279	432	2062	1965	2566	1392	2349	1158	1595	2060	1593	1700	2870	1098	1686	1683	1749	1730	2765	1043	1829	1590	7	0	0	0	0	0	0	1
Asia	IND_228	2877	885	1091	3219	2017	1741	2306	439	2075	1991	2587	1408	2377	1166	1609	2077	1609	1753	2805	1087	1738	1676	1657	1740	2823	1069	1757	1609	6	0	0	0	0	0	1	0
Asia	IND_23	2845	886	1092	3215	2020	1737	2306	437	2081	1990	2590	1411	2377	1168	1606	2081	1612	1812	2911	1159	1620	2062	1823	1791	2970	1027	1707	1655	7	0	0	0	0	0	0	1
Asia	IND_233	2814	873	1082	3164	1997	1719	2267	434	2049	1960	2546	1389	2339	1151	1587	2053	1594	1737	2700	1075	1658	1647	1598	1671	2740	1089	1671	1628	2	0	1	0	0	0	0	0
Asia	IND_236	2846	884	1090	3211	2020	1737	2308	436	2077	1988	2589	1413	2371	1165	1609	2084	1647	1693	2876	1073	1916	1832	2054	1726	2840	1149	1842	1535	7	0	0	0	0	0	0	1
Asia	IND_237	2880	887	1091	3224	2023	1739	2308	438	2077	1992	2591	1409	2377	1165	1610	2082	1988	1726	2405	541	2034	2032	2511	1470	2482	1118	1630	2009	4	0	0	0	1	0	0	0
Asia	IND_24	2852	879	1088	3204	2004	1731	2295	437	2058	1981	2576	1397	2361	1162	1599	2068	1598	1709	2888	1108	1692	1698	1760	1735	2780	1049	1827	1595	7	0	0	0	0	0	0	1
Asia	IND_240	2774	865	1073	3112	1978	1694	2239	433	2025	1939	2509	1377	2321	1132	1564	2025	1563	1741	2831	1167	1627	1969	1787	1825	2812	1023	1690	1614	2	0	1	0	0	0	0	0
Asia	IND_244	2878	883	1091	3219	2021	1740	2304	437	2078	1989	2587	1408	2377	1168	1606	2081	1562	1760	2948	1025	1853	1835	2037	1728	2873	1192	1802	1614	7	0	0	0	0	0	0	1
[truncated: 1,007 more rows]
